# Supplementary material for: Malonyl-proteome profiles of Staphylococcus aureus reveal lysine malonylation modification in enzymes involved in energy metabolism
Source: Proteome Sci. 2021 Jan 12;19:1. doi: 10.1186/s12953-020-00169-1 (PMC7802289; doi:10.1186/s12953-020-00169-1)
Supplement: Supplementary file 6 — Additional file 6: Table S1. Annotated MS/MS spectra of malonylated peptides and sites in Staphylococcus aureus. [file 12953_2020_169_MOESM6_ESM.xlsx]

## Sheet: Summary
Header line description of table 1			Table 1. MS/MS spectrum database search analysis summary
Total spectrums	Number of spectrums produced by mass spectrometer
Matched spectrums	Number of spectrums matched with alignment protein		Total spectrums	Matched spectrums	Peptides	Modified peptides	Identified proteins	Identified sites
Peptides	Number of peptides which spectrums hit		36783	3742 (10.2%)	2846	422	281	440
Modified peptides	Total number of modified peptides identified
Identified proteins	Number of proteins detected by spectrum search analysis
Identified sites	Number of modification sites detected by spectrum search analysis
Header line description of worksheet "Ident"
Protein accession	Protein accession number of database used for search
Position	Modification site localization in protein
Amino acid	The amino acid that modification site modified
Protein description	Protein functional description
Gene name	Indicates the name of the gene that code for the protein sequence
Localization probability	Probability of a certain amino acid containing this modification in this peptide
PEP	The maximal posterior error probability for peptides
Score	A simple rule to be used to judge whether a result is significant or not
Modified sequence	Identified peptide sequence marked with modification sites localization probabilities
Charge	Carried charge of peptide
Mass error [ppm]	Parts per million ratio of peptide mass error between the theory and practice
MS/MS Count	Number of spectrum matched with peptide
Header line description of worksheet "pep_Ident"
ID	Identified peptide index number
Sequence	Identified peptide amino acid sequence
Length	Identified peptide amino acid length
Modifications	identified peptide with modification markers
Modified sequence	Identified peptide sequence marked with modification sites localization probabilities
Protein accession	Protein accession number of database used for search
Protein description	Protein functional description
Charge	Carried charge of peptide
m/z	Mass-to-charge ratio of peptide
Mass error [ppm]	Parts per million ratio of peptide mass error between the theory and practice
PEP	The maximal posterior error probability for peptides
Score	A simple rule to be used to judge whether a result is significant or not
MS/MS Count	Number of spectrum matched with peptide

## Sheet: Ident
Protein accession	Position	Amino acid	Protein description	Gene name	Localization probability	PEP	Score	Modified sequence	Charge	Mass error [ppm]	MS/MS Count
A0A033U6Y8	351	K	Uncharacterized protein OS=Staphylococcus aureus C0673 OX=1413510 GN=V070_02861 PE=4 SV=1	V070_02861	1	0.018766	69.716	NK(1)DIHNK(1)K	2	0.15995	1
A0A033U6Y8	346	K	Uncharacterized protein OS=Staphylococcus aureus C0673 OX=1413510 GN=V070_02861 PE=4 SV=1	V070_02861	1	0.018766	69.716	NK(1)DIHNK(1)K	2	0.15995	1
A0A033UAF5	622	K	Helicase ATP-binding domain-containing protein OS=Staphylococcus aureus C0673 OX=1413510 GN=V070_02653 PE=4 SV=1	V070_02653	1	0.0177289	48.346	IQIAAFK(1)K	2	0.26533	1
A0A033UB82	211	K	Uncharacterized protein OS=Staphylococcus aureus C0673 OX=1413510 GN=V070_02785 PE=4 SV=1	V070_02785	1	0.0170019	44.318	K(1)QAFSQMR	2	1.0163	1
A0A033UHR0	149	K	50S ribosomal protein L1 OS=Staphylococcus aureus C0673 OX=1413510 GN=rplA PE=3 SV=1	rplA	1	0.0100979	64.82	TGTVTMDIK(1)K	2	1.0023	1
A0A033UHR0	150	K	50S ribosomal protein L1 OS=Staphylococcus aureus C0673 OX=1413510 GN=rplA PE=3 SV=1	rplA	1	0.0282113	74.376	K(1)AVEEIK	2	-2.2614	1
A0A033UHV7	201	K	Fe/B12 periplasmic-binding domain-containing protein OS=Staphylococcus aureus C0673 OX=1413510 GN=V070_02348 PE=4 SV=1	V070_02348	1	0.0227555	63.185	LDQK(1)VK(1)SVK(1)SK	2	-0.0184	1
A0A033UHV7	198	K	Fe/B12 periplasmic-binding domain-containing protein OS=Staphylococcus aureus C0673 OX=1413510 GN=V070_02348 PE=4 SV=1	V070_02348	1	0.0227555	63.185	LDQK(1)VK(1)SVK(1)SK	2	-0.0184	1
A0A033UHV7	196	K	Fe/B12 periplasmic-binding domain-containing protein OS=Staphylococcus aureus C0673 OX=1413510 GN=V070_02348 PE=4 SV=1	V070_02348	1	0.0227555	63.185	LDQK(1)VK(1)SVK(1)SK	2	-0.0184	1
A0A033UTW5	48	K	Uncharacterized protein OS=Staphylococcus aureus C0673 OX=1413510 GN=V070_01472 PE=4 SV=1	V070_01472	1	0.0127129	41.242	QIRQGIHDINK(1)LK	3	0.86234	1
A0A033UX65	322	K	Uncharacterized protein OS=Staphylococcus aureus C0673 OX=1413510 GN=V070_01487 PE=3 SV=1	V070_01487	1	0.0284676	44.391	DLK(1)SNLDVIFNAEDDAGK	2	1.6334	1
A0A033UX71	549	K	UvrABC system protein B OS=Staphylococcus aureus C0673 OX=1413510 GN=uvrB PE=3 SV=1	uvrB	1	0.0059042	46.318	AARNDK(1)GK(1)VIMYADK	2	-0.2216	1
A0A033UX71	547	K	UvrABC system protein B OS=Staphylococcus aureus C0673 OX=1413510 GN=uvrB PE=3 SV=1	uvrB	1	0.0059042	46.318	AARNDK(1)GK(1)VIMYADK	2	-0.2216	1
A0A033UYW2	88	K	Putative phosphoesterase V070_01115 OS=Staphylococcus aureus C0673 OX=1413510 GN=V070_01115 PE=3 SV=1	V070_01115	1	0.0274757	54.343	VTK(1)TDELESLFSK	2	1.8031	1
A0A033UZD3	324	K	Chaperone protein DnaK OS=Staphylococcus aureus C0673 OX=1413510 GN=dnaK PE=2 SV=1	dnaK	1	0.0299919	50.452	IPAVQEAIK(1)K	2	1.8583	1
A0A033V012	116	K	Uncharacterized protein OS=Staphylococcus aureus C0673 OX=1413510 GN=V070_00889 PE=4 SV=1	V070_00889	1	0.0270481	61.958	ISNIK(1)FLEQK	2	-0.63845	1
A0A033V2H9	413	K	Aspartate--tRNA ligase OS=Staphylococcus aureus C0673 OX=1413510 GN=aspS PE=3 SV=1	aspS	0.821743	0.0226701	43.03	NK(0.822)LGK(0.178)DRGLIDPNK	2	-0.27775	1
A0A033V2U0	90	K	Catabolite control protein A OS=Staphylococcus aureus C0673 OX=1413510 GN=V070_00793 PE=4 SV=1	V070_00793	1	1.59548e-12	103.84	GLEDIATMYK(1)YHTIISNSDNDSEK	3	2.7803	1
A0A033V3T9	74	K	Uncharacterized protein OS=Staphylococcus aureus C0673 OX=1413510 GN=V070_00320 PE=4 SV=1	V070_00320	1	0.00941991	77.185	ISANISNMK(1)DAQTK	2	-1.8456	1
A0A077UDE1	160	K	Phage tail length tape-measure protein OS=Staphylococcus aureus OX=1280 GN=ERS140147_00038 PE=4 SV=1	ERS140147_00038	1	0.0140432	44.863	NTLNQLNDK(1)K	2	1.8253	1
A0A077UDZ4	152	K	Malonyl CoA-acyl carrier protein transacylase OS=Staphylococcus aureus OX=1280 GN=fabD PE=3 SV=1	fabD	1	3.62266e-11	91.416	SLSTEDK(1)VIEPANINCPGQIVVSGHK	3	1.5291	1
A0A077UHM5	18	K	Threonine--tRNA ligase OS=Staphylococcus aureus OX=1280 GN=thrS PE=3 SV=1	thrS	1	1.94067e-07	94.387	AFDK(1)GTTTEEIAQSISPGLR	3	-1.2285	1
A0A077UKC4	242	K	Foldase protein PrsA OS=Staphylococcus aureus OX=1280 GN=prsA PE=3 SV=1	prsA	0.999923	0.000338811	66.636	TSFGYHIIK(1)ADKPTDFNSEK	3	1.756	1
A0A077UM26	128	K	Pyruvate carboxylase OS=Staphylococcus aureus OX=1280 GN=cfiB_1 PE=4 SV=1	cfiB_1	1	0.00602572	46.494	TTAIK(1)AELPVIPGTDGPIK	2	1.2741	2
A0A077UMT2	215	K	Aldehyde dehydrogenase OS=Staphylococcus aureus OX=1280 GN=ERS140147_01910 PE=3 SV=1	ERS140147_01910	1	4.55903e-12	98.684	GVFNLVNGDGAGVGNPLSEHPK(1)IR	3	2.3366	1
A0A077UNA1	109	K	Transcription antitermination protein NusB OS=Staphylococcus aureus OX=1280 GN=nusB PE=3 SV=1	nusB	1	6.77399e-05	72.793	VVMNEAVELTK(1)QFSDDEHYK	3	-1.323	2
A0A077UNH0	64	K	Deoxyribose-phosphate aldolase OS=Staphylococcus aureus OX=1280 GN=dra_1 PE=4 SV=1	dra_1	1	5.98829e-17	137.21	NLEDFNK(1)MIEAGATR	2	0.71005	1
A0A077URT6	265	K	Hydrolase (HAD superfamily) OS=Staphylococcus aureus OX=1280 GN=ywpJ PE=4 SV=1	ywpJ	1	0.00311993	74.296	IAK(1)YITDTNENSGVGK	2	-0.10586	1
A0A077UTD0	181	K	Putative ATP-dependent protease ATP-binding subunit ClpL OS=Staphylococcus aureus OX=1280 GN=clpL PE=3 SV=1	clpL	1	0.00110174	89.624	GAFEENIQK(1)LIEGVK	2	0.70083	1
A0A077V0G8	331	K	Leukocidin S subunit OS=Staphylococcus aureus OX=1280 GN=ERS140147_02062 PE=4 SV=1	ERS140147_02062	0.944611	0.0221526	54.343	VVDK(0.945)YSDQNK(0.055)PYK	2	2.037	1
A0A077VL81	422	K	Protein translocase subunit SecY OS=Staphylococcus aureus OX=1280 GN=secY_1 PE=3 SV=1	secY_1	1	0.000242913	98.105	SLEAQVTQK(1)EYK	2	1.1007	1
A0A0D1JQA9	21	K	Cytokinin riboside 5'-monophosphate phosphoribohydrolase OS=Staphylococcus aureus subsp. aureus OX=46170 GN=QU38_10435 PE=3 SV=1	QU38_10435	1	3.54286e-07	111.64	GHDPSYLQK(1)AYDLGK	2	0.99666	1
A0A0E1X434	33	K	UPF0342 protein HMPREF0769_11833 OS=Staphylococcus aureus subsp. aureus MN8 OX=548470 GN=HMPREF0769_11833 PE=3 SV=1	HMPREF0769_11833	1	0.00153317	58.98	EAFANVK(1)ANEESK	2	-2.3326	1
A0A0E1X434	55	K	UPF0342 protein HMPREF0769_11833 OS=Staphylococcus aureus subsp. aureus MN8 OX=548470 GN=HMPREF0769_11833 PE=3 SV=1	HMPREF0769_11833	1	2.26006e-08	82.635	ETQINFQQK(1)QMQGEEITEEDLQK	3	-2.7197	1
A0A0H3JT97	10	K	Uncharacterized protein OS=Staphylococcus aureus (strain Mu50 / ATCC 700699) OX=158878 GN=SAV0386 PE=4 SV=1	SAV0386	1	0.0135989	44.925	TIQSIK(1)DPHYNEALK	3	0.35061	1
A0A0H3K384	26	K	Uncharacterized protein OS=Staphylococcus aureus (strain MW2) OX=196620 GN=MW1437 PE=4 SV=1	MW1437	1	0.0202515	63.181	EK(1)AGILFEELAHNK	2	0.1781	1
A0A0H3K756	110	K	Hypoxanthine phosphoribosyltransferase OS=Staphylococcus aureus (strain Newman) OX=426430 GN=hpt PE=3 SV=1	hpt	1	0.000200765	82.651	K(1)VNSLEIVTLLDKPNR	3	-1.9072	1
A0A0U1MDV9	161	K	Redox-sensing transcriptional repressor Rex OS=Staphylococcus aureus OX=1280 GN=rex PE=3 SV=1	rex	1	0.00206958	83.856	VAQK(1)IADELVQAGVK	2	2.9705	2
A0A0U1MFX6	375	K	Serine--tRNA ligase OS=Staphylococcus aureus OX=1280 GN=serS PE=3 SV=1	serS	1	1.85679e-11	119.68	AAK(1)PELAHTLNGSGLAVGR	3	-0.94044	2
A0A0U1MFX6	66	K	Serine--tRNA ligase OS=Staphylococcus aureus OX=1280 GN=serS PE=3 SV=1	serS	1	0.00628197	71.601	NK(1)ENADDVIAEMR	2	-1.1931	1
A0A0U1MFX6	253	K	Serine--tRNA ligase OS=Staphylococcus aureus OX=1280 GN=serS PE=3 SV=1	serS	1	0.00184337	52.772	NEIIQPGILPEK(1)FTGQSACFR	2	0.70333	2
A0A0U1MI40	445	K	Methionine--tRNA ligase OS=Staphylococcus aureus OX=1280 GN=metS PE=3 SV=1	metS	1	0.000476705	82.663	YIDETTPWVLAK(1)DESQK	2	0.44921	1
A0A0U1MK55	166	K	Ribonuclease J OS=Staphylococcus aureus OX=1280 GN=rnj PE=3 SV=1	rnj	1	0.0210268	40.242	IVHTGDFK(1)FDFTPVGK	3	1.0809	1
A0A0U1MKT5	59	K	DNA-directed RNA polymerase subunit omega OS=Staphylococcus aureus OX=1280 GN=rpoZ PE=3 SV=1	rpoZ	1	0.00466451	79.659	ALEEIAEGK(1)IR	2	-2.5848	1
A0A0U1ML60	220	K	Alanine dehydrogenase OS=Staphylococcus aureus OX=1280 GN=ald PE=3 SV=1	ald	1	3.58758e-05	97.904	DVTIVK(1)STPENLAEQIK	2	-1.2161	1
A0A0U1MLN5	60	K	ADP-ribose pyrophosphatase OS=Staphylococcus aureus OX=1280 GN=nudF PE=4 SV=1	nudF	1	0.0100111	85.29	KEVLLVK(1)QYR	2	0.79305	1
A0A0U1MRH3	59	K	50S ribosomal protein L6 OS=Staphylococcus aureus OX=1280 GN=rplF PE=1 SV=1	rplF	1	2.82947e-09	117.18	QEENTIEVVRPSESK(1)EDR	3	1.0616	1
A0A0U1MX25	231	K	Phosphomethylpyrimidine kinase OS=Staphylococcus aureus OX=1280 GN=pdxK PE=4 SV=1	pdxK	1	0.0105089	73.435	TPK(1)EAVISAK	2	3.1015	1
A0A0U1MY72	315	K	Pyruvate dehydrogenase E1 component subunit alpha OS=Staphylococcus aureus OX=1280 GN=pdhA PE=4 SV=1	pdhA	1	3.7698e-12	131.66	GLWNEEK(1)ENEVIER	2	-1.5021	2
A0A0U1MY72	214	K	Pyruvate dehydrogenase E1 component subunit alpha OS=Staphylococcus aureus OX=1280 GN=pdhA PE=4 SV=1	pdhA	1	0.0212931	59.227	SK(1)QTAAETLAQK	2	-0.69752	1
A0A0U1MY72	13	K	Pyruvate dehydrogenase E1 component subunit alpha OS=Staphylococcus aureus OX=1280 GN=pdhA PE=4 SV=1	pdhA	1	0.0318493	45.885	LQAQFDAVK(1)VLNDTQSK	2	-0.77261	1
A0A0U1N014	38	K	Delta-aminolevulinic acid dehydratase OS=Staphylococcus aureus OX=1280 GN=hemB PE=3 SV=1	hemB	0.999959	0.00738909	44.998	KEDLIYPIFVVEK(1)DDIK	3	0.4936	1
A0A0U1N0K7	153	K	Glucosamine-6-phosphate deaminase OS=Staphylococcus aureus OX=1280 GN=SAMEA2445518_00033 PE=4 SV=1	SAMEA2445518_00033	1	5.4088e-08	131.83	EVVEK(1)LYQENGK	2	-2.5728	2
A0A133QCU1	98	K	2,3-bisphosphoglycerate-dependent phosphoglycerate mutase (Fragment) OS=Staphylococcus aureus OX=1280 GN=HMPREF3211_00061 PE=3 SV=1	HMPREF3211_00061	1	4.08825e-05	102.65	HYGGLQGLNK(1)DDAR	2	0.92433	2
A0A143SME3	32	K	Immunoglobulin G binding protein A (Fragment) OS=Staphylococcus aureus OX=1280 GN=spa PE=4 SV=1	spa	0.987715	0.0143857	40.493	K(0.992)TTK(0.037)NLVK(0.984)K(0.988)TTK	2	-1.924	1
A0A143SME3	24	K	Immunoglobulin G binding protein A (Fragment) OS=Staphylococcus aureus OX=1280 GN=spa PE=4 SV=1	spa	0.992033	0.0143857	40.493	K(0.992)TTK(0.037)NLVK(0.984)K(0.988)TTK	2	-1.924	1
A0A143SME3	31	K	Immunoglobulin G binding protein A (Fragment) OS=Staphylococcus aureus OX=1280 GN=spa PE=4 SV=1	spa	0.983517	0.0143857	40.493	K(0.992)TTK(0.037)NLVK(0.984)K(0.988)TTK	2	-1.924	1
A0A173M2C6	736	K	Phi77 ORF002-like protein, phage minor structural protein OS=Staphylococcus aureus OX=1280 PE=4 SV=1		0.999374	0.00545329	53.6	QNSELK(0.001)ARNAEK(0.999)K	2	0.16511	1
A0A1L1JYE6	80	K	UDP-N-acetylglucosamine 1-carboxyvinyltransferase OS=Staphylococcus aureus OX=1280 GN=murA PE=3 SV=1	murA	0.98976	0.000190235	48.286	K(0.01)DENAVIVDATK(0.99)TLNEEAPYEYVSK	3	0.88355	1
A0A1Q1PSV0	18	K	Uncharacterized protein (Fragment) OS=Staphylococcus aureus subsp. aureus OX=46170 PE=4 SV=1		1	0.0223274	40.067	ARQK(1)WTLK	2	-2.0651	1
A0A1Q8DAZ4	12	K	Fe-S cluster assembly protein SufB OS=Staphylococcus aureus OX=1280 GN=BSZ10_12555 PE=4 SV=1	BSZ10_12555	1	7.82927e-05	75.533	APDVGDYK(1)YGFHDEDVSIFR	3	0.42306	1
A0A1Q8DBU8	103	K	50S ribosomal protein L15 OS=Staphylococcus aureus OX=1280 GN=rplO PE=3 SV=1	rplO	1	1.85334e-08	88.548	FEDGTEVTPALLVETGVVK(1)NEK	3	-0.87316	1
A0A1Q8DCV5	169	K	DNA-binding response regulator OS=Staphylococcus aureus OX=1280 GN=BSZ10_08810 PE=4 SV=1	BSZ10_08810	1	0.00378049	76.332	NQVLTK(1)DQLYAK	2	-1.0776	1
A0A1Q8DD26	261	K	Aldehyde dehydrogenase family protein OS=Staphylococcus aureus OX=1280 GN=BSZ10_08665 PE=3 SV=1	BSZ10_08665	1	0.000395147	90.348	SPYIVLDDVDVK(1)EVAK	2	3.5402	1
A0A1Q8DD72	44	K	Pyruvate kinase OS=Staphylococcus aureus OX=1280 GN=BSZ10_08420 PE=3 SV=1	BSZ10_08420	1	0.0154736	44.44	LNFSHGSHEEHK(1)AR	3	0.49827	1
A0A1Q8DDB0	74	K	DNA-binding protein OS=Staphylococcus aureus OX=1280 GN=BSZ10_08325 PE=4 SV=1	BSZ10_08325	1	0.0277349	50.534	QTNSYDLAFEELEK(1)EK	2	4.1121	1
A0A1Q8DDS2	123	K	FMN-dependent NADH-azoreductase OS=Staphylococcus aureus OX=1280 GN=azoR PE=3 SV=1	azoR	1	0.00261264	76.158	TFK(1)YTAEGPQGLLTDK	2	1.0652	1
A0A1Q8DDV1	367	K	Probable malate:quinone oxidoreductase OS=Staphylococcus aureus OX=1280 GN=mqo PE=3 SV=1	mqo	1	0.00663456	48.729	YSFDQIIMTK(1)EGCMNHLR	3	-0.47285	2
A0A1Q8DDV1	335	K	Probable malate:quinone oxidoreductase OS=Staphylococcus aureus OX=1280 GN=mqo PE=3 SV=1	mqo	1	0.00746616	77.185	NGSNLDLFK(1)SIK	2	2.769	2
A0A1Q8DDZ4	67	K	DNA-binding protein OS=Staphylococcus aureus OX=1280 GN=BSZ10_06920 PE=3 SV=1	BSZ10_06920	1	1.35887e-19	154.1	NPQTGK(1)EIEIPASK	2	-1.4074	3
A0A1Q8DE33	5	K	Transketolase OS=Staphylococcus aureus OX=1280 GN=BSZ10_06770 PE=3 SV=1	BSZ10_06770	1	0.00871033	62.162	MFNEK(1)DQLAIDTIR	2	1.6306	1
A0A1Q8DEH4	72	K	Uncharacterized protein OS=Staphylococcus aureus OX=1280 GN=BSZ10_06015 PE=4 SV=1	BSZ10_06015	1	5.21227e-10	152.07	LTEDIQGK(1)VER	2	-0.29241	1
A0A1Q8DF91	289	K	Dihydrolipoyl dehydrogenase OS=Staphylococcus aureus OX=1280 GN=BSZ10_04685 PE=3 SV=1	BSZ10_04685	1	5.34759e-08	99.963	RPNTDELGLEELGLK(1)FADR	3	-0.68131	1
A0A1Q8DF92	92	K	DUF697 domain-containing protein OS=Staphylococcus aureus OX=1280 GN=BSZ10_04765 PE=4 SV=1	BSZ10_04765	1	0.00177635	65.477	IYGLDHK(1)QVNTLGDDVK	3	0.071751	1
A0A1Q8DGF6	92	K	Uncharacterized protein OS=Staphylococcus aureus OX=1280 GN=BSZ10_02095 PE=4 SV=1	BSZ10_02095	1	0.0184465	47.302	FEINVSK(1)NIK(1)K	2	1.8201	1
A0A1Q8DGF6	95	K	Uncharacterized protein OS=Staphylococcus aureus OX=1280 GN=BSZ10_02095 PE=4 SV=1	BSZ10_02095	1	0.0184465	47.302	FEINVSK(1)NIK(1)K	2	1.8201	1
A0A1Q8DH67	89	K	Lactate dehydrogenase OS=Staphylococcus aureus OX=1280 GN=BSZ10_01065 PE=3 SV=1	BSZ10_01065	1	0.0022742	68.168	TAGFDMYDLELAK(1)K	2	-2.5216	2
A0A1Q8DH79	239	K	Pyruvate oxidase OS=Staphylococcus aureus OX=1280 GN=BSZ10_01180 PE=3 SV=1	BSZ10_01180	1	8.93617e-06	57.21	IPVIHTLPAK(1)TIIPDDHPYSIGNLGK	4	-0.11228	1
A0A1Q8DHH3	188	K	Autolysin OS=Staphylococcus aureus OX=1280 GN=BSZ10_00230 PE=4 SV=1	BSZ10_00230	1	0.0289674	57.55	K(1)AILGGAK	2	0.92601	1
A0A1Q8DHR5	446	K	Nitrate reductase subunit alpha OS=Staphylococcus aureus OX=1280 GN=BSZ10_00685 PE=3 SV=1	BSZ10_00685	1	0.0149579	47.657	K(1)VTLANGK	2	-1.5727	1
A0A1W5T8T7	4	K	Putative membrane protein OS=Staphylococcus aureus OX=1280 PE=4 SV=1		0.999885	0.0300503	44.395	MKLK(1)YINK	2	1.737	1
A0A2D1CK30	24	K	30S ribosomal protein S10 OS=Staphylococcus aureus OX=1280 GN=rpsJ PE=3 SV=1	rpsJ	1	7.14816e-07	109.04	VIDQSAEK(1)IVETAK	2	-1.2441	1
A0A2S6DFE3	66	K	Probable transcriptional regulatory protein C7P97_12080 OS=Staphylococcus aureus OX=1280 GN=C7P97_12080 PE=3 SV=1	C7P97_12080	1	0.000129647	99.796	TYSVPNHIIEK(1)AIEK	2	-1.6422	2
A0A2S6DIZ2	71	K	Type I glyceraldehyde-3-phosphate dehydrogenase (Fragment) OS=Staphylococcus aureus OX=1280 GN=CSC87_15190 PE=4 SV=1	CSC87_15190	1	0.00307701	89.231	NLDNPHK(1)DLR	2	1.4368	1
A0A2S6DJS3	215	K	Pyruvate dehydrogenase (Acetyl-transferring) E1 component subunit alpha (Fragment) OS=Staphylococcus aureus OX=1280 GN=CSC87_13880 PE=4 SV=1	CSC87_13880	0.810373	0.0027762	58.079	TSDEDDEWVK(0.81)K(0.19)DPLVR	3	2.8838	1
A0A2X2JUG5	75	K	50S ribosomal protein L18 OS=Staphylococcus aureus OX=1280 GN=rplR PE=4 SV=1	rplR	1	0.00551172	74.141	VELATK(1)VGEAIAK	2	1.8114	1
A0A2X2JUG5	49	K	50S ribosomal protein L18 OS=Staphylococcus aureus OX=1280 GN=rplR PE=4 SV=1	rplR	1	5.68807e-09	104.53	HIYAQIIDDNK(1)GVTLAQASSK	3	1.982	1
A0A2X2JXN0	53	K	Thioredoxin OS=Staphylococcus aureus OX=1280 GN=trxA_1 PE=4 SV=1	trxA_1	1	0.0303912	51.495	DGQPVDK(1)VVGFQPK	2	1.4595	1
A0A2X2JXX4	59	K	ESAT-6-like protein OS=Staphylococcus aureus OX=1280 GN=esxA PE=3 SV=1	esxA	1	7.0259e-20	155.96	FEEQFQQLSPK(1)VEK	2	-0.33482	1
A0A2X2JXX4	62	K	ESAT-6-like protein OS=Staphylococcus aureus OX=1280 GN=esxA PE=3 SV=1	esxA	1	1.17229e-06	107.74	VEK(1)FAQLLEEIK	2	-0.31466	1
A0A2X2JYX5	269	K	NADH dehydrogenase OS=Staphylococcus aureus OX=1280 GN=NCTC7878_00625 PE=4 SV=1	NCTC7878_00625	1	0.000270891	97.235	GSK(1)LMEESFEGVK	2	2.2426	2
A0A2X2JYX5	152	K	NADH dehydrogenase OS=Staphylococcus aureus OX=1280 GN=NCTC7878_00625 PE=4 SV=1	NCTC7878_00625	1	0.00904073	76.073	FANYAASK(1)EK	2	-0.30724	1
A0A2X2JYX5	144	K	NADH dehydrogenase OS=Staphylococcus aureus OX=1280 GN=NCTC7878_00625 PE=4 SV=1	NCTC7878_00625	1	2.22207e-07	117.18	HIEDK(1)FANYAASK	2	0.93417	1
A0A2X2K1B6	56	K	Uncharacterized protein conserved in bacteria OS=Staphylococcus aureus OX=1280 GN=NCTC7878_01399 PE=4 SV=1	NCTC7878_01399	1	0.023999	63.426	K(1)VIAPLIK	2	1.6382	1
A0A2X2K2B2	84	K	5-amino-6-(5-phosphoribosylamino)uracil reductase OS=Staphylococcus aureus OX=1280 GN=ribD_1 PE=4 SV=1	ribD_1	1	0.0219033	46.069	AK(1)AK(1)QLPQITVK	2	-1.08	1
A0A2X2K2B2	86	K	5-amino-6-(5-phosphoribosylamino)uracil reductase OS=Staphylococcus aureus OX=1280 GN=ribD_1 PE=4 SV=1	ribD_1	1	0.0219033	46.069	AK(1)AK(1)QLPQITVK	2	-1.08	1
A0A2X2K695	151	K	Deoxyribose-phosphate aldolase OS=Staphylococcus aureus OX=1280 GN=dra_2 PE=3 SV=1	dra_2	1	2.73144e-06	71.651	AAGADFVK(1)TSTGFAGGGATAEDVK	3	-0.085519	1
A0A2X2KJ73	5	K	TmRNA-binding protein SmpB OS=Staphylococcus aureus OX=1280 GN=smpB_1 PE=4 SV=1	smpB_1	1	0.00556659	70.808	K(1)SPGTLAENR	2	0.10511	2
A0A2X2LW70	242	K	Iron-sulfur cluster assembly protein SufD OS=Staphylococcus aureus OX=1280 GN=sufD_2 PE=4 SV=1	sufD_2	1	0.000857935	83.423	SVVVGTGEQK(1)INLTSK	2	-1.8528	1
A0A2X2M020	49	K	30S ribosomal protein S2 OS=Staphylococcus aureus OX=1280 GN=rpsB PE=1 SV=1	rpsB	1	0.000184002	112.44	K(1)VDEAYNFLK	2	1.6089	2
A0A2X2M020	73	K	30S ribosomal protein S2 OS=Staphylococcus aureus OX=1280 GN=rpsB PE=1 SV=1	rpsB	1	0.000267452	87.654	QVSEDGGQVLFVGTK(1)K	2	2.4479	1
A0A2X2M020	45	K	30S ribosomal protein S2 OS=Staphylococcus aureus OX=1280 GN=rpsB PE=1 SV=1	rpsB	1	0.00235145	85.493	NGIYIIDLQK(1)TVK	2	0.9761	1
A0A2Y9TRY4	384	K	Aspartyl/glutamyl-tRNA(Asn/Gln) amidotransferase subunit B OS=Staphylococcus aureus OX=1280 GN=gatB PE=3 SV=1	gatB	1	0.0136218	62.861	LIEDGTMSSK(1)IAK	2	0.53243	1
A0A2Y9TRY4	456	K	Aspartyl/glutamyl-tRNA(Asn/Gln) amidotransferase subunit B OS=Staphylococcus aureus OX=1280 GN=gatB PE=3 SV=1	gatB	1	9.58894e-05	60.062	ASK(1)GQANPQLVNQLLK	2	2.7233	1
A0A2Y9TRY4	388	K	Aspartyl/glutamyl-tRNA(Asn/Gln) amidotransferase subunit B OS=Staphylococcus aureus OX=1280 GN=gatB PE=3 SV=1	gatB	1	1.03079e-06	94.538	K(1)VFPELAAK	2	2.3858	1
A0A380DLE6	66	K	Putative DUF28-containing protein OS=Staphylococcus aureus OX=1280 GN=NCTC6133_00798 PE=4 SV=1	NCTC6133_00798	1	0.0223273	40.432	TYSVPNHIIEK(1)AIDK	3	-2.5272	1
A0A380DRL8	33	K	CSD family cold shock protein OS=Staphylococcus aureus OX=1280 GN=cspA PE=4 SV=1	cspA	1	0.00881662	66.299	GPQAANVVK(1)L	2	1.2884	1
A0A380DTQ1	50	K	50S ribosomal protein L4 OS=Staphylococcus aureus OX=1280 GN=rplD PE=4 SV=1	rplD	1	0.0260495	50.088	NVLSTLEQPK(1)K	2	0.038186	1
A0A380DTU2	20	K	Iron-sulfur cluster regulator IscR OS=Staphylococcus aureus OX=1280 GN=iscR_2 PE=4 SV=1	iscR_2	1	0.000119482	128.54	K(1)EGQGCISLK	2	0.57372	1
A0A380DUE7	311	K	Serine hydroxymethyltransferase OS=Staphylococcus aureus OX=1280 GN=glyA PE=3 SV=1	glyA	1	0.0193241	52.72	NTIPFDQEK(1)PFVTSGIR	2	0.52363	1
A0A380DVD9	86	K	Potassium-transporting ATPase subunit B 2 OS=Staphylococcus aureus OX=1280 GN=kdpB_4 PE=4 SV=1	kdpB_4	1	0.0098578	53.211	IGK(1)QLLMTR	2	0.36277	1
A0A380DVG0	123	K	Translation initiation factor IF-3 OS=Staphylococcus aureus OX=1280 GN=infC PE=3 SV=1	infC	1	0.000149589	103.44	AITHK(1)EIGQR	2	0.75048	2
A0A380DX73	260	K	Adenylosuccinate lyase OS=Staphylococcus aureus OX=1280 GN=purB_2 PE=4 SV=1	purB_2	1	0.0240099	44.366	GQK(1)GSSAMPHK	3	-1.9512	1
A0A380DX99	8	K	Molybdenum cofactor biosynthesis protein B OS=Staphylococcus aureus OX=1280 GN=moaB_2 PE=4 SV=1	moaB_2	1	0.0100626	74.237	GEHQNVK(1)LNR	2	-0.86748	2
A0A380DXY3	156	K	Pyrimidine-nucleoside phosphorylase OS=Staphylococcus aureus OX=1280 GN=pdp PE=3 SV=1	pdp	1	9.2226e-08	110.44	VAVVGQSGNLTPADK(1)K	2	-0.91568	1
A0A380DYD9	342	K	Zn-dependent hydrolase OS=Staphylococcus aureus OX=1280 GN=NCTC5664_02203 PE=4 SV=1	NCTC5664_02203	1	0.000965587	88.338	AGAHIIPNNK(1)K	2	0.18208	1
A0A380DYD9	343	K	Zn-dependent hydrolase OS=Staphylococcus aureus OX=1280 GN=NCTC5664_02203 PE=4 SV=1	NCTC5664_02203	1	0.000557974	82.01	K(1)IHASSHGCMEELK	3	0.26318	1
A0A380DZB9	447	K	Topoisomerase IV subunit B OS=Staphylococcus aureus OX=1280 GN=parE_2 PE=4 SV=1	parE_2	1	0.00928212	69.721	K(1)FQAILPLR	2	-0.10907	1
A0A380E0X3	47	K	Uncharacterized protein OS=Staphylococcus aureus OX=1280 GN=NCTC5664_03087 PE=4 SV=1	NCTC5664_03087	1	0.00644297	64.454	VASK(1)TSAAISNTASDVK	2	-0.8582	1
A0A380E122	102	K	Phosphate acyltransferase OS=Staphylococcus aureus OX=1280 GN=plsX_2 PE=3 SV=1	plsX_2	1	2.43393e-18	140.95	ISLLNIGTEPAK(1)GNSLTK	3	0.7576	2
A0A380E1N6	6	K	Thioredoxin reductase OS=Staphylococcus aureus OX=1280 GN=trxB_4 PE=4 SV=1	trxB_4	1	0.0138425	53.565	K(1)LGVPGEQELGGR	2	1.1139	1
A0A380E2J6	198	K	Iron-sulfur cluster assembly ATPase SufC OS=Staphylococcus aureus OX=1280 GN=yurY PE=4 SV=1	yurY	1	0.0163166	65.043	VVK(1)SGGPELAK	2	-0.64377	1
A0A380E4Q6	528	K	Exodeoxyribonuclease V alpha chain OS=Staphylococcus aureus OX=1280 GN=recD PE=4 SV=1	recD	0.999999	0.00321655	65.241	MKLGQK(1)IDITQR	2	-1.1248	1
A0A380E903	92	K	ATPase TraE OS=Staphylococcus aureus OX=1280 GN=NCTC10702_00036 PE=4 SV=1	NCTC10702_00036	0.999875	0.0297071	44.349	TK(1)QK(0.848)K(0.848)K(0.303)SR	2	-0.52781	1
A0A380E903	95	K	ATPase TraE OS=Staphylococcus aureus OX=1280 GN=NCTC10702_00036 PE=4 SV=1	NCTC10702_00036	0.84836	0.0297071	44.349	TK(1)QK(0.848)K(0.848)K(0.303)SR	2	-0.52781	1
A0A380E903	94	K	ATPase TraE OS=Staphylococcus aureus OX=1280 GN=NCTC10702_00036 PE=4 SV=1	NCTC10702_00036	0.84836	0.0297071	44.349	TK(1)QK(0.848)K(0.848)K(0.303)SR	2	-0.52781	1
A0A380EFL0	334	K	Scaffold protein sufB OS=Staphylococcus aureus OX=1280 GN=NCTC10702_01397 PE=4 SV=1	NCTC10702_01397	1	0.00267945	57.173	MIHK(1)APNTSSTIVSK	3	-1.1242	1
A0A380EHV2	328	K	3-oxoacyl-[acyl-carrier-protein] synthase, KASII OS=Staphylococcus aureus OX=1280 GN=fabF PE=3 SV=1	fabF	1	0.00700882	61.11	NTFGEAAK(1)HLK	3	2.453	1
A0A380EKQ6	59	K	Elongation factor P OS=Staphylococcus aureus OX=1280 GN=efp PE=3 SV=1	efp	1	0.0128259	59.15	AGEK(1)VEPAMIENR	2	3.1166	1
A0A380ELR3	97	K	Transaldolase OS=Staphylococcus aureus OX=1280 GN=tal PE=4 SV=1	tal	1	6.33906e-12	128.79	IPIVNTK(1)GESTIPLIK	2	2.264	1
A0A389XRT2	437	K	Ser-Asp rich fibrinogen/bone sialoprotein-binding protein SdrE_1 OS=Staphylococcus aureus OX=1280 GN=sdrE_1 PE=4 SV=1	sdrE_1	1	0.0277812	52.482	K(1)NVNLIR	2	-1.9866	1
A0A3A3AQW1	358	K	Pyruvate oxidase OS=Staphylococcus aureus OX=1280 GN=cidC PE=3 SV=1	cidC	1	0.00452763	50.897	NNNSK(1)PLRPER	3	-0.68679	1
A0A3M9DXN1	11	K	Thiol reductase thioredoxin OS=Staphylococcus aureus OX=1280 GN=DDL17_07305 PE=4 SV=1	DDL17_07305	1	4.25169e-12	121.03	SNESFK(1)SIINSDTPVIVK	2	0.032362	1
A0A4T9Z4Q4	1248	K	Mannosyl-glycoprotein endo-beta-N-acetylglucosamidase OS=Staphylococcus aureus subsp. aureus OX=46170 GN=FAF17_04715 PE=4 SV=1	FAF17_04715	1	0.0125269	47.774	IGEIGK(1)YFDIPQYK	3	2.7232	1
A0A5C8X1Y9	152	K	2-oxo acid dehydrogenase subunit E2 (Fragment) OS=Staphylococcus aureus OX=1280 GN=FVP29_19450 PE=4 SV=1	FVP29_19450	1	0.00124523	75.911	ILDGLQTGK(1)FMNHIK	3	1.2065	1
A0A5C8X2B0	202	K	Ribose-phosphate pyrophosphokinase (Fragment) OS=Staphylococcus aureus OX=1280 GN=FVP29_19975 PE=3 SV=1	FVP29_19975	1	9.89472e-09	105.46	TPIAIIDK(1)R	2	-4.2662	1
A0A5C8X3J2	5	K	GTP pyrophosphokinase family protein (Fragment) OS=Staphylococcus aureus OX=1280 GN=FVP29_17825 PE=4 SV=1	FVP29_17825	1	7.03569e-05	60.735	K(1)QYEVGEQASPIEFVTGR	2	0.24071	2
A0A5C8X421	338	K	Inosine-5'-monophosphate dehydrogenase (Fragment) OS=Staphylococcus aureus OX=1280 GN=guaB PE=3 SV=1	guaB	1	0.0141382	60.157	K(1)FVPEGIEGR	2	-1.8492	1
A0A5C8X571	62	K	Uridine monophosphate kinase (Fragment) OS=Staphylococcus aureus OX=1280 GN=FVP29_14200 PE=4 SV=1	FVP29_14200	1	0.012747	64.52	GK(1)TGSDLGMDR	2	-0.8968	1
A0A5C8X589	93	K	Arsenate reductase OS=Staphylococcus aureus OX=1280 GN=spxA_1 PE=3 SV=1	spxA_1	1	0.000852737	56.514	LELLSSDGMLVK(1)R	2	-1.5492	2
A0A5C8X5B7	34	K	30S ribosomal protein S12 (Fragment) OS=Staphylococcus aureus OX=1280 GN=FVP29_13465 PE=4 SV=1	FVP29_13465	1	0.00351775	59.796	K(1)FTDLNSPQK	2	-2.3595	1
A0A5C8X5B7	43	K	30S ribosomal protein S12 (Fragment) OS=Staphylococcus aureus OX=1280 GN=FVP29_13465 PE=4 SV=1	FVP29_13465	1	0.000974319	91.961	FTDLNSPQK(1)R	2	2.4979	1
A0A5C8X7Q8	3	K	SDR family NAD(P)-dependent oxidoreductase (Fragment) OS=Staphylococcus aureus OX=1280 GN=FVP29_09105 PE=4 SV=1	FVP29_09105	1	0.00971648	58.079	TK(1)SALVTGASR	2	0.3621	1
A0A5C8X8E1	38	K	CoA-disulfide reductase (Fragment) OS=Staphylococcus aureus OX=1280 GN=FVP29_07925 PE=4 SV=1	FVP29_07925	1	0.000348893	99.283	K(1)YALAYTPEK	2	-0.15366	1
A0A5C8XBB5	179	K	DUF1054 family protein (Fragment) OS=Staphylococcus aureus OX=1280 GN=FVP29_03010 PE=4 SV=1	FVP29_03010	1	0.0193831	60.398	AITPQDK(1)R	2	-1.2897	1
A0A5S9EUA0	299	K	Proline dehydrogenase OS=Staphylococcus aureus OX=1280 GN=TMSFP482_16730 PE=4 SV=1	TMSFP482_16730	1	2.51287e-08	110.12	LAERPQNLSLALK(1)EFVK	3	-2.101	1
A0A658B9J9	235	K	L-threonine dehydratase catabolic TdcB OS=Staphylococcus aureus OX=1280 GN=DDL17_15820 PE=3 SV=1	DDL17_15820	1	3.50098e-14	110.38	VDSTIADGCDVK(1)VPGEQTYEVVK	3	1.7477	1
A0A659FUB0	266	K	Carbamate kinase OS=Staphylococcus aureus OX=1280 GN=arcC PE=3 SV=1	arcC	1	0.000143879	98.943	YAAQAK(1)FAEGSMLPK	3	-1.0127	2
A0A6A8FYG7	53	K	1-acyl-sn-glycerol-3-phosphate acyltransferase (Fragment) OS=Staphylococcus aureus OX=1280 GN=GF572_06090 PE=4 SV=1	GF572_06090	1	0.012314	52.495	RPINLLK(1)DNK	3	-0.33866	1
A0A6A9GTV7	30	K	Catabolite control protein A OS=Staphylococcus aureus OX=1280 GN=ccpA PE=4 SV=1	ccpA	1	0.0159611	60.489	VVNGNQNVK(1)AETK	2	-0.948	1
A0A6B0A7W0	427	K	AAA domain-containing protein OS=Staphylococcus aureus OX=1280 GN=GO651_14495 PE=4 SV=1	GO651_14495	0.911778	8.0701e-06	78.554	VK(0.088)NEK(0.912)EAAVHAQEFENAANLR	4	3.4981	1
A0A6B0AR42	57	K	CsbD family protein OS=Staphylococcus aureus OX=1280 GN=GO661_09025 PE=4 SV=1	GO661_09025	1	0.00597723	89.047	ATDFIDK(1)LK	2	-1.2908	1
A0A6B0AR42	41	K	CsbD family protein OS=Staphylococcus aureus OX=1280 GN=GO661_09025 PE=4 SV=1	GO661_09025	1	0.00423029	92.866	AK(1)EFVENAK	2	-0.35268	1
A0A6B0AR42	15	K	CsbD family protein OS=Staphylococcus aureus OX=1280 GN=GO661_09025 PE=4 SV=1	GO661_09025	1	0.00103236	92.427	GNVK(1)ETVGNVTDNK	2	0.026267	1
A0A6B0B8B7	210	K	Helix-turn-helix domain-containing protein (Fragment) OS=Staphylococcus aureus OX=1280 GN=GO793_00445 PE=4 SV=1	GO793_00445	1	0.00515178	56.424	ETAGHIIHELK(1)DEK	3	0.90782	1
A0A6B0BAU5	203	K	Ketose-bisphosphate aldolase (Fragment) OS=Staphylococcus aureus OX=1280 GN=GO793_02780 PE=4 SV=1	GO793_02780	1	0.00586141	89.301	IK(1)EFGTSNR	2	-0.57204	1
A0A6B0BAU5	111	K	Ketose-bisphosphate aldolase (Fragment) OS=Staphylococcus aureus OX=1280 GN=GO793_02780 PE=4 SV=1	GO793_02780	1	1.68968e-11	100.7	TGIDALAPALGSVHGPYK(1)GEPK	3	2.0505	2
A0A6B0BAU5	168	K	Ketose-bisphosphate aldolase (Fragment) OS=Staphylococcus aureus OX=1280 GN=GO793_02780 PE=4 SV=1	GO793_02780	1	1.63632e-24	160.55	INVNTENQIASAK(1)AVR	2	1.0168	1
A0A6B0BAU5	48	K	Ketose-bisphosphate aldolase (Fragment) OS=Staphylococcus aureus OX=1280 GN=GO793_02780 PE=4 SV=1	GO793_02780	1	0.0109895	50.116	K(1)VVEYAHEK	3	-1.1751	1
A0A6B0BDT6	46	K	NADP-dependent phosphogluconate dehydrogenase (Fragment) OS=Staphylococcus aureus OX=1280 GN=gndA PE=4 SV=1	gndA	1	0.0226785	61.167	TDLMVEESK(1)GK	2	0.63059	1
A0A6B0BDT6	259	K	NADP-dependent phosphogluconate dehydrogenase (Fragment) OS=Staphylococcus aureus OX=1280 GN=gndA PE=4 SV=1	gndA	1	2.33087e-08	136.83	ILDTAGQK(1)GTGK	2	0.6556	1
A0A6B0BGX4	76	K	Transporter substrate-binding domain-containing protein (Fragment) OS=Staphylococcus aureus OX=1280 GN=GO793_18085 PE=4 SV=1	GO793_18085	1	0.00771843	55.37	K(1)QK(1)PNAK(1)IK	2	2.3775	1
A0A6B0BGX4	78	K	Transporter substrate-binding domain-containing protein (Fragment) OS=Staphylococcus aureus OX=1280 GN=GO793_18085 PE=4 SV=1	GO793_18085	1	0.00771843	55.37	K(1)QK(1)PNAK(1)IK	2	2.3775	1
A0A6B0BGX4	82	K	Transporter substrate-binding domain-containing protein (Fragment) OS=Staphylococcus aureus OX=1280 GN=GO793_18085 PE=4 SV=1	GO793_18085	1	0.00771843	55.37	K(1)QK(1)PNAK(1)IK	2	2.3775	1
A0A6B0BK82	17	K	Acryloyl-CoA reductase (Fragment) OS=Staphylococcus aureus OX=1280 GN=GO793_04015 PE=4 SV=1	GO793_04015	0.971643	0.00681599	46.415	AFVIDK(0.028)DESGK(0.972)VTPTFK	3	1.2031	1
A0A6B0BSI2	100	K	CTP synthase (Fragment) OS=Staphylococcus aureus OX=1280 GN=GO793_17275 PE=4 SV=1	GO793_17275	1	0.0125699	78.939	VYSHVLK(1)K	2	1.456	1
A0A6B0BUT7	237	K	Methylenetetrahydrofolate--tRNA-(Uracil(54)-C(5))-methyltransferase (FADH(2)-oxidizing) TrmFO (Fragment) OS=Staphylococcus aureus OX=1280 GN=GO793_12680 PE=4 SV=1	GO793_12680	0.999785	0.00780629	41.689	K(1)TLLFGPMKPVGLEDPK	3	2.4596	1
A0A6B0D0I6	178	K	DNA-directed RNA polymerase subunit alpha (Fragment) OS=Staphylococcus aureus OX=1280 GN=rpoA PE=4 SV=1	rpoA	1	0.00881712	55.112	SEAEMMK(1)VR	2	-0.64398	1
A0A6B0D5T8	97	K	Tryptophan--tRNA ligase (Fragment) OS=Staphylococcus aureus OX=1280 GN=trpS PE=4 SV=1	trpS	1	0.000231243	93.226	NFISLLDEPNVAAK(1)K	2	-1.0715	1
A0A6B1RF37	49	K	Nitric oxide dioxygenase OS=Staphylococcus aureus OX=1280 GN=GAY51_02405 PE=4 SV=1	GAY51_02405	1	8.20651e-05	87.676	AHPELLNMFNQTNQK(1)R	3	1.6709	1
A0A6B1RIE9	134	K	Alcohol dehydrogenase AdhP OS=Staphylococcus aureus OX=1280 GN=adhP PE=4 SV=1	adhP	1	0.00501252	41.911	VPEK(1)LDPAAASSITCAGVTTYK	3	-2.7157	1
A0A6B1RKF6	281	K	Molybdopterin molybdenumtransferase MoeA OS=Staphylococcus aureus OX=1280 GN=GAY51_01205 PE=4 SV=1	GAY51_01205	1	0.0247794	67.334	VLFNK(1)VAMR	2	-2.7651	1
A0A6B1RLG9	265	K	Zinc-binding dehydrogenase OS=Staphylococcus aureus OX=1280 GN=GAY51_01625 PE=4 SV=1	GAY51_01625	1	0.026974	59.908	IQGTLIK(1)K	2	-0.2208	1
A0A6B1RMR4	328	K	Transcriptional regulator OS=Staphylococcus aureus OX=1280 GN=GAY51_12330 PE=4 SV=1	GAY51_12330	1	0.000215631	99.344	VETDK(1)VTTSVETK	2	-2.8833	1
A0A6B1RMR4	336	K	Transcriptional regulator OS=Staphylococcus aureus OX=1280 GN=GAY51_12330 PE=4 SV=1	GAY51_12330	1	0.00500176	78.814	VTTSVETK(1)TEK	2	-0.35075	1
A0A6B1RNA8	190	K	Ferrochelatase OS=Staphylococcus aureus OX=1280 GN=hemH PE=4 SV=1	hemH	1	2.24492e-08	87.196	GLIEK(1)NNDPYPQELEHTALLIK	3	0.91678	1
A0A6B1RND6	103	K	Xanthine phosphoribosyltransferase OS=Staphylococcus aureus OX=1280 GN=xpt PE=4 SV=1	xpt	1	0.0286283	61.11	NK(1)TSTIIVSK	2	0.26581	1
A0A6B1RND6	83	K	Xanthine phosphoribosyltransferase OS=Staphylococcus aureus OX=1280 GN=xpt PE=4 SV=1	xpt	1	4.8596e-08	99.092	AK(1)PSTLTDGYYETSIHSFTK	3	2.0108	1
A0A6B1RND6	101	K	Xanthine phosphoribosyltransferase OS=Staphylococcus aureus OX=1280 GN=xpt PE=4 SV=1	xpt	1	4.02535e-05	68.386	AKPSTLTDGYYETSIHSFTK(1)NK	3	0.89648	2
A0A6B1RNF5	217	K	Triose-phosphate isomerase OS=Staphylococcus aureus OX=1280 GN=GAY51_03870 PE=4 SV=1	GAY51_03870	1	6.9907e-05	104.9	IQYGGSVK(1)PNNIK	2	0.23371	1
A0A6B1RNF5	151	K	Triose-phosphate isomerase OS=Staphylococcus aureus OX=1280 GN=GAY51_03870 PE=4 SV=1	GAY51_03870	1	0.00807319	62.055	K(1)AVAGLSEEQLK	2	0.36563	1
A0A6B1RNF5	150	K	Triose-phosphate isomerase OS=Staphylococcus aureus OX=1280 GN=GAY51_03870 PE=4 SV=1	GAY51_03870	1	0.0151032	56.29	ANDVVGEQVK(1)K	2	-0.93238	1
A0A6B1RQ03	25	K	HTH-type transcriptional regulator SarS OS=Staphylococcus aureus OX=1280 GN=sarS PE=4 SV=1	sarS	0.835338	0.00901257	54.09	K(0.835)VK(0.165)PEVDMTIK	3	0.44285	1
A0A6B1RQF5	282	K	Elastin-binding protein EbpS OS=Staphylococcus aureus OX=1280 GN=ebpS PE=4 SV=1	ebpS	1	8.72549e-05	54.865	GAAIGAGTAGLAGGAASK(1)SASAASK	3	-0.42728	1
A0A6B1RTI2	149	K	Uncharacterized protein OS=Staphylococcus aureus OX=1280 GN=GAY51_06375 PE=4 SV=1	GAY51_06375	1	0.0024533	81.854	SVAVSNEESK(1)ASALK	2	-1.0283	1
A0A6B1RTI2	154	K	Uncharacterized protein OS=Staphylococcus aureus OX=1280 GN=GAY51_06375 PE=4 SV=1	GAY51_06375	1	0.00499311	54.898	ASALK(1)AQQAAIK	2	0.20742	1
A0A6B1RTI2	101	K	Uncharacterized protein OS=Staphylococcus aureus OX=1280 GN=GAY51_06375 PE=4 SV=1	GAY51_06375	1	0.0128602	52.862	NEQAALK(1)AQQAAIK	2	2.5576	1
A0A6B1RTI2	14	K	Uncharacterized protein OS=Staphylococcus aureus OX=1280 GN=GAY51_06375 PE=4 SV=1	GAY51_06375	1	0.00189807	71.98	NK(1)HTYQNEPLPNR	3	0.44929	1
A0A6B1RUQ0	626	K	Translation initiation factor IF-2 OS=Staphylococcus aureus OX=1280 GN=infB PE=4 SV=1	infB	1	0.00335093	73.448	VSK(1)VGTIAGCYVTEGK	2	2.5274	1
A0A6B1RUQ0	111	K	Translation initiation factor IF-2 OS=Staphylococcus aureus OX=1280 GN=infB PE=4 SV=1	infB	1	0.00559386	72.891	NNK(1)PQNQPAAPK	2	1.4741	1
A0A6B1RUQ0	150	K	Translation initiation factor IF-2 OS=Staphylococcus aureus OX=1280 GN=infB PE=4 SV=1	infB	1	0.0246218	50.897	LNVESSEIIK(1)K	2	1.9618	1
A0A6B1RWP0	127	K	Elongation factor Ts OS=Staphylococcus aureus OX=1280 GN=GAY51_11945 PE=4 SV=1	GAY51_11945	1	0.0143414	66.246	IK(1)EAILTIGEK	2	2.7765	1
A0A6B1RWP0	219	K	Elongation factor Ts OS=Staphylococcus aureus OX=1280 GN=GAY51_11945 PE=4 SV=1	GAY51_11945	1	3.22742e-20	156.17	QQALNEGK(1)PENIVEK	2	-1.9228	2
A0A6B1RWP0	289	K	Elongation factor Ts OS=Staphylococcus aureus OX=1280 GN=GAY51_11945 PE=4 SV=1	GAY51_11945	1	0.0210763	56.514	EENFADEVK(1)GQMK	2	-1.4264	1
A0A6B1RWP0	24	K	Elongation factor Ts OS=Staphylococcus aureus OX=1280 GN=GAY51_11945 PE=4 SV=1	GAY51_11945	1	0.0149439	59.227	TGAGMMDCK(1)K	2	-0.5054	1
A0A6B3J3J6	4	K	LPXTG cell wall anchor domain-containing protein (Fragment) OS=Staphylococcus aureus OX=1280 GN=G0004_13780 PE=4 SV=1	G0004_13780	1	0.02547	42.19	APTK(1)K(1)AQSK	2	0.84146	1
A0A6B3J3J6	5	K	LPXTG cell wall anchor domain-containing protein (Fragment) OS=Staphylococcus aureus OX=1280 GN=G0004_13780 PE=4 SV=1	G0004_13780	1	0.02547	42.19	APTK(1)K(1)AQSK	2	0.84146	1
A0A6B5B7N3	56	K	Glutamine--fructose-6-phosphate transaminase (Isomerizing) OS=Staphylococcus aureus OX=1280 GN=glmS PE=4 SV=1	glmS	1	1.92156e-06	98.002	K(1)VADSSDFDGPVGIGHTR	3	-1.2489	1
A0A6B5B7N3	46	K	Glutamine--fructose-6-phosphate transaminase (Isomerizing) OS=Staphylococcus aureus OX=1280 GN=glmS PE=4 SV=1	glmS	1	3.48415e-07	93.812	GYDSAGIAVVNEDNTTVFK(1)EK	3	-1.8675	2
A0A6B5BCA5	320	K	Ornithine--oxo-acid transaminase OS=Staphylococcus aureus OX=1280 GN=G0V21_03190 PE=4 SV=1	G0V21_03190	1	0.000918294	92.19	SLELGEYFK(1)EQLK	2	-1.113	1
A0A6B5BMQ1	6	K	CsbD family protein OS=Staphylococcus aureus OX=1280 GN=G0W92_03945 PE=4 SV=1	G0W92_03945	1	0.00435633	85.672	ADESK(1)FDQFK	2	1.6427	1
A0A6B5BYF4	84	K	DUF488 domain-containing protein OS=Staphylococcus aureus OX=1280 GN=G0V76_01435 PE=4 SV=1	G0V76_01435	1	0.0200189	45.28	DQDAQK(1)DAFDK(1)LK	2	2.8106	1
A0A6B5BYF4	79	K	DUF488 domain-containing protein OS=Staphylococcus aureus OX=1280 GN=G0V76_01435 PE=4 SV=1	G0V76_01435	1	0.0200189	45.28	DQDAQK(1)DAFDK(1)LK	2	2.8106	1
A0A6B5C3Z3	10	K	ABC transporter ATP-binding protein OS=Staphylococcus aureus OX=1280 GN=G0Y89_00645 PE=4 SV=1	G0Y89_00645	1	0.00372811	82.651	DIIK(1)NFGEGLSETK	2	2.5066	1
A0A6B5FF04	286	K	Fe-S cluster assembly protein SufD OS=Staphylococcus aureus OX=1280 GN=sufD PE=4 SV=1	sufD	1	0.0125769	58.079	STSSLK(1)SVVIGTGEQK	2	1.3582	1
A0A6B5FID7	47	K	(Deoxy)nucleoside triphosphate pyrophosphohydrolase OS=Staphylococcus aureus OX=1280 GN=G0Y99_11820 PE=4 SV=1	G0Y99_11820	1	0.00125113	94.309	NETEK(1)EALIR	2	-3.5305	1
A0A6B5GNM7	111	K	50S ribosomal protein L22 OS=Staphylococcus aureus OX=1280 GN=rplV PE=4 SV=1	rplV	1	0.00449036	56.514	TSHITIVVSDAK(1)EEAK	3	-0.35478	2
A0A6B5H121	286	K	DNA repair protein Rad50 OS=Staphylococcus aureus OX=1280 GN=G0Z13_13675 PE=4 SV=1	G0Z13_13675	1	0.000280809	106.67	NK(1)QEQAAYIK	2	-0.53976	1
A0A6B5HIK0	199	K	Enoyl-ACP reductase FabI OS=Staphylococcus aureus OX=1280 GN=fabI PE=4 SV=1	fabI	1	0.00594355	69.361	TLSAK(1)GVGGFNTILK	2	-0.3623	1
A0A6B5HIK0	26	K	Enoyl-ACP reductase FabI OS=Staphylococcus aureus OX=1280 GN=fabI PE=4 SV=1	fabI	1	0.0126151	58.024	SIAFGVAK(1)VLDQLGAK	2	1.6973	1
A0A6B5I265	348	K	ATP-dependent Clp protease ATP-binding subunit OS=Staphylococcus aureus OX=1280 GN=G0X69_04915 PE=4 SV=1	G0X69_04915	1	0.0125243	66.267	K(1)AVSAEEYK	2	-0.64001	1
A0A6B5I2R8	310	K	DNA gyrase subunit A OS=Staphylococcus aureus OX=1280 GN=gyrA PE=4 SV=1	gyrA	1	0.00247762	76.586	K(1)DANASVILNNLYK	2	0.024247	1
A0A6B5I3U4	30	K	Transcriptional regulator (Fragment) OS=Staphylococcus aureus OX=1280 GN=G0V76_13030 PE=4 SV=1	G0V76_13030	1	0.0133953	57.434	ILSQEDYFDK(1)K	2	0.17006	1
A0A6B5I3U4	51	K	Transcriptional regulator (Fragment) OS=Staphylococcus aureus OX=1280 GN=G0V76_13030 PE=4 SV=1	G0V76_13030	1	0.02467	62.633	K(1)IESLLSR	2	0.23435	1
A0A6B5I3U4	20	K	Transcriptional regulator (Fragment) OS=Staphylococcus aureus OX=1280 GN=G0V76_13030 PE=4 SV=1	G0V76_13030	1	6.9632e-07	110.84	AVK(1)ILSQEDYFDK	2	2.7032	1
A0A6B5IAJ9	180	K	Response regulator transcription factor OS=Staphylococcus aureus OX=1280 GN=G0V76_05795 PE=4 SV=1	G0V76_05795	1	0.0126798	51.771	TVK(1)THVSNILSK	3	0.32157	1
A0A6B5IAJ9	133	K	Response regulator transcription factor OS=Staphylococcus aureus OX=1280 GN=G0V76_05795 PE=4 SV=1	G0V76_05795	1	0.0209664	54.898	GESVFEPEILVK(1)MR	2	-0.28218	1
A0A6B5INL4	102	K	YtxH domain-containing protein (Fragment) OS=Staphylococcus aureus OX=1280 GN=G0Y40_12015 PE=4 SV=1	G0Y40_12015	1	1.53264e-17	139.88	GK(1)FDDEGGAAPNNNLR	2	0.48605	1
A0A6B5IW32	14	K	Asp23/Gls24 family envelope stress response protein (Fragment) OS=Staphylococcus aureus OX=1280 GN=G0Y39_11460 PE=4 SV=1	G0Y39_11460	1	0.00491821	54.309	HGVNISK(1)TANK	3	-0.80541	1
A0A6B5IWQ1	509	K	Ribonuclease J (Fragment) OS=Staphylococcus aureus OX=1280 GN=G0Y39_12630 PE=4 SV=1	G0Y39_12630	1	0.0309841	76.165	IK(1)TDVISK	2	-1.4309	1
A0A6B5K1Z1	227	K	ADP-forming succinate--CoA ligase subunit beta OS=Staphylococcus aureus OX=1280 GN=sucC PE=4 SV=1	sucC	1	0.0295373	49.189	HK(1)DVVELR	3	-1.2987	1
A0A6B5KXU0	48	K	Zinc-binding alcohol dehydrogenase family protein OS=Staphylococcus aureus OX=1280 GN=G0X68_08590 PE=4 SV=1	G0X68_08590	1	0.0265241	52.891	VNSISLNPVDTK(1)QR	2	-0.97573	1
A0A6B5LYT4	163	K	Uncharacterized protein OS=Staphylococcus aureus OX=1280 GN=G0Z30_00670 PE=4 SV=1	G0Z30_00670	1	0.00948354	45.28	NTLNQLNNK(1)EVK(1)TR	3	1.9365	1
A0A6B5LYT4	160	K	Uncharacterized protein OS=Staphylococcus aureus OX=1280 GN=G0Z30_00670 PE=4 SV=1	G0Z30_00670	1	0.00948354	45.28	NTLNQLNNK(1)EVK(1)TR	3	1.9365	1
A0A6B5MGD4	618	K	ATP-dependent metallopeptidase FtsH/Yme1/Tma family protein OS=Staphylococcus aureus OX=1280 GN=G0Z30_13305 PE=4 SV=1	G0Z30_13305	0.966668	1.6479e-14	113.73	LPEIDYDAAK(0.967)VVK(0.033)DEESEFNDGK	3	0.47925	1
A0A6B5MHG9	835	K	Valine--tRNA ligase OS=Staphylococcus aureus OX=1280 GN=G0X47_01375 PE=4 SV=1	G0X47_01375	1	0.0140533	60.255	K(1)LSNENFVSK	2	-0.079476	1
A0A6B5QQ07	104	K	Thioredoxin family protein (Fragment) OS=Staphylococcus aureus OX=1280 GN=G0Y42_11745 PE=4 SV=1	G0Y42_11745	1	0.0113726	47.548	LIDQYLTNGK(1)SR	2	-1.7226	1
A0A6B5SE92	63	K	DEAD/DEAH box helicase OS=Staphylococcus aureus OX=1280 GN=G0Y75_11455 PE=4 SV=1	G0Y75_11455	1	0.0176203	55.66	TGAFGIPLIEK(1)IVGK	2	0.81442	1
A0A6B5SE92	118	K	DEAD/DEAH box helicase OS=Staphylococcus aureus OX=1280 GN=G0Y75_11455 PE=4 SV=1	G0Y75_11455	1	0.000788254	86.214	K(1)GPQIVVGTPGR	2	0.43587	1
A0A6B5T415	43	K	Phenylalanine--tRNA ligase subunit beta OS=Staphylococcus aureus OX=1280 GN=G0Z16_01135 PE=4 SV=1	G0Z16_01135	0.999953	0.0278472	47.774	DIK(1)NLVAGFVK(0.5)SK(0.5)EK	2	0.49095	1
A0A6B5TE67	67	K	Uncharacterized protein OS=Staphylococcus aureus OX=1280 GN=G0Y08_08465 PE=4 SV=1	G0Y08_08465	1	0.0175522	60.91	SLDAFSNK(1)K	2	0.2885	1
A0A6B5TP74	273	K	PTS transporter subunit EIIA OS=Staphylococcus aureus OX=1280 GN=G0V88_08810 PE=4 SV=1	G0V88_08810	1	0.00940724	47.082	RPEELINK(1)ALDTSR	3	1.0221	1
A0A6B5TP74	223	K	PTS transporter subunit EIIA OS=Staphylococcus aureus OX=1280 GN=G0V88_08810 PE=4 SV=1	G0V88_08810	1	0.00198644	58.373	VETNGSSGIK(1)NHLTEQDIK	3	-2.1874	1
A0A6B5TQF4	488	K	YSIRK-type signal peptide-containing protein OS=Staphylococcus aureus OX=1280 GN=G0W53_00820 PE=4 SV=1	G0W53_00820	1	7.75601e-09	119.46	VGEGQPTEEITK(1)QPIDK	3	1.7597	2
A0A6B5TUA1	21	K	DNA-directed RNA polymerase subunit beta OS=Staphylococcus aureus OX=1280 GN=rpoC PE=4 SV=1	rpoC	1	0.0287684	57.785	K(1)PETINYR	2	-1.1692	1
A0A6B5UDB5	42	K	DUF1514 domain-containing protein (Fragment) OS=Staphylococcus aureus OX=1280 GN=G0W04_00730 PE=4 SV=1	G0W04_00730	1	0.0255723	41.652	RMNNDIK(1)K	2	1.2789	1
A0A6B5UMM0	19	K	Uncharacterized protein OS=Staphylococcus aureus OX=1280 GN=G0X47_00400 PE=4 SV=1	G0X47_00400	1	0.00129872	117.09	K(1)IVQHLEER	2	-0.98831	1
A0A6B5UN24	555	K	Molecular chaperone DnaK OS=Staphylococcus aureus OX=1280 GN=dnaK PE=4 SV=1	dnaK	1	0.0002684	97.631	TALEGQDIEEIK(1)SK	2	1.4178	1
A0A6C1EUG3	27	K	Phosphoglycerate kinase OS=Staphylococcus aureus OX=1280 GN=GZ067_05860 PE=4 SV=1	GZ067_05860	1	0.000426131	84.107	ADFNVPLK(1)DGEITNDNR	3	1.4249	2
A0A6C1EUG3	272	K	Phosphoglycerate kinase OS=Staphylococcus aureus OX=1280 GN=GZ067_05860 PE=4 SV=1	GZ067_05860	1	0.00888241	76.357	VAK(1)EFSNDAK	2	0.39325	1
A0A6C1EUG3	261	K	Phosphoglycerate kinase OS=Staphylococcus aureus OX=1280 GN=GZ067_05860 PE=4 SV=1	GZ067_05860	1	2.96276e-07	120.53	HGDK(1)ILLPVDTK	2	1.431	2
A0A6C1EUG3	181	K	Phosphoglycerate kinase OS=Staphylococcus aureus OX=1280 GN=GZ067_05860 PE=4 SV=1	GZ067_05860	0.999998	2.78744e-05	64.589	EIK(1)FIGGVVNDPHKPVVAILGGAK	4	0.43581	1
A0A6C1EUG3	192	K	Phosphoglycerate kinase OS=Staphylococcus aureus OX=1280 GN=GZ067_05860 PE=4 SV=1	GZ067_05860	1	0.00752054	40.986	FIGGVVNDPHK(1)PVVAILGGAK	3	1.251	1
A0A6C1EUG3	211	K	Phosphoglycerate kinase OS=Staphylococcus aureus OX=1280 GN=GZ067_05860 PE=4 SV=1	GZ067_05860	1	5.91226e-12	142.91	INVIK(1)NLVNIADK	2	-2.43	1
A0A6D1RY52	20	K	Membrane protein OS=Staphylococcus aureus OX=1280 GN=SAMEA1708664_02358 PE=4 SV=1	SAMEA1708664_02358	1	0.0227601	58.172	YGESPK(1)YPSTIK	2	-0.50548	1
A0A6D2GXJ7	283	K	ATP synthase F0F1 subunit alpha OS=Staphylococcus aureus OX=1280 GN=atpA PE=4 SV=1	atpA	1	0.0225941	79.451	K(1)VAGTLR	2	-0.20492	1
A0A6D2H3K1	1645	K	Phage tail tape measure protein OS=Staphylococcus aureus OX=1280 GN=SAMEA2080329_02483 PE=4 SV=1	SAMEA2080329_02483	0.993708	0.0168305	45.661	INNK(0.994)LEK(0.006)QK	2	-4.3246	1
A6QJ75	69	K	30S ribosomal protein S5 OS=Staphylococcus aureus (strain Newman) OX=426430 GN=rpsE PE=3 SV=1	rpsE	1	0.0320371	55.718	K(1)DLVVVPR	2	2.0851	1
A6QJ75	155	K	30S ribosomal protein S5 OS=Staphylococcus aureus (strain Newman) OX=426430 GN=rpsE PE=3 SV=1	rpsE	1	0.00286233	97.734	NAEDVAK(1)LR	2	-2.1278	1
E9LJ88	38	K	Superoxide dismutase A (Fragment) OS=Staphylococcus aureus OX=1280 GN=sodA PE=4 SV=1	sodA	1	2.10284e-09	105.24	HHNTYVTK(1)LNAAVEGTDLESK	3	0.82455	2
I6QWL1	24	K	Uncharacterized protein OS=Staphylococcus aureus OX=1280 PE=4 SV=1		1	0.0133953	57.434	K(1)QAEIYPTALK	2	1.4649	1
P39853	303	K	Capsular polysaccharide biosynthesis protein CapD OS=Staphylococcus aureus OX=1280 GN=capD PE=3 SV=1	capD	1	0.0259579	68.846	QVSK(1)FDPQK	2	-0.9579	1
P67513	279	K	Leucine--tRNA ligase OS=Staphylococcus aureus (strain N315) OX=158879 GN=leuS PE=1 SV=1	leuS	1	0.0280461	61.423	VK(1)AYQTEASK	2	-0.057469	1
Q2FVA3	8	K	D-lactate dehydrogenase, putative OS=Staphylococcus aureus (strain NCTC 8325) OX=93061 GN=SAOUHSC_02830 PE=3 SV=1	SAOUHSC_02830	1	0.00010932	107.39	K(1)NNVEVTTSK	2	-1.1015	1
Q2FVA3	211	K	D-lactate dehydrogenase, putative OS=Staphylococcus aureus (strain NCTC 8325) OX=93061 GN=SAOUHSC_02830 PE=3 SV=1	SAOUHSC_02830	1	0.0107034	64.121	K(1)GAILVNAAR	2	0.034431	1
Q2FVA6	58	K	N-acetyltransferase domain-containing protein OS=Staphylococcus aureus (strain NCTC 8325) OX=93061 GN=SAOUHSC_02827 PE=4 SV=1	SAOUHSC_02827	1	0.0109693	57.347	LLK(1)AVVEHAR	3	0.7012	1
Q2G1U3	206	K	Oligoendopeptidase F OS=Staphylococcus aureus (strain NCTC 8325) OX=93061 GN=SAOUHSC_00937 PE=3 SV=1	SAOUHSC_00937	1	0.000493512	62.589	DGNAHPLTQGTFIK(1)YLETDDR	3	2.2193	1
Q2YVZ4	53	K	Immunoglobulin-binding protein Sbi OS=Staphylococcus aureus (strain bovine RF122 / ET3-1) OX=273036 GN=sbi PE=3 SV=1	sbi	1	0.000572461	49.66	HQTTQNNYITDQQK(1)AFYQVLHLK	4	-1.8397	1
Q2YWN8	15	K	UPF0337 protein SAB0772 OS=Staphylococcus aureus (strain bovine RF122 / ET3-1) OX=273036 GN=SAB0772 PE=3 SV=1	SAB0772	1	0.0134384	46.704	GNVK(1)ETIGNVTDNK	3	-0.18265	1
Q2YX14	308	K	Probable quinol oxidase subunit 2 OS=Staphylococcus aureus (strain bovine RF122 / ET3-1) OX=273036 GN=qoxA PE=3 SV=1	qoxA	1	0.00644994	69.03	K(1)AQITNANYK	2	-1.2505	1
Q2YX14	296	K	Probable quinol oxidase subunit 2 OS=Staphylococcus aureus (strain bovine RF122 / ET3-1) OX=273036 GN=qoxA PE=3 SV=1	qoxA	0.836658	4.15806e-18	121.46	DPNFTSEENMFK(0.837)DVSEK(0.163)PLIPAR	3	-0.90243	1
Q6GDG4	93	K	Immunodominant staphylococcal antigen B OS=Staphylococcus aureus (strain MRSA252) OX=282458 GN=isaB PE=3 SV=1	isaB	1	0.0292326	57.175	YDQTFK(1)GVTAK	2	2.2739	1
Q6GDJ7	183	K	Fructose-bisphosphate aldolase class 1 OS=Staphylococcus aureus (strain MRSA252) OX=282458 GN=fda PE=3 SV=3	fda	1	0.00200707	74.657	GLVPIIEPEVNINAK(1)DK	2	-2.1795	1
Q6GDJ7	223	K	Fructose-bisphosphate aldolase class 1 OS=Staphylococcus aureus (strain MRSA252) OX=282458 GN=fda PE=3 SV=3	fda	1	2.86176e-07	91.416	LTIPTEANLYK(1)DLAEHPNVVR	3	1.9894	1
Q6GFZ4	66	K	Thiol peroxidase OS=Staphylococcus aureus (strain MRSA252) OX=282458 GN=tpx PE=3 SV=1	tpx	1	0.00835694	95.815	K(1)FNSEASK	2	1.0615	1
Q6GGC5	25	K	30S ribosomal protein S21 OS=Staphylococcus aureus (strain MRSA252) OX=282458 GN=rpsU PE=3 SV=1	rpsU	1	0.00323891	79.652	SVSK(1)SGTIQEVR	2	-0.31235	1
Q6GGC5	8	K	30S ribosomal protein S21 OS=Staphylococcus aureus (strain MRSA252) OX=282458 GN=rpsU PE=3 SV=1	rpsU	1	0.00391622	77.185	K(1)NESLEDALR	2	0.44443	1
Q6GGW9	25	K	Alanine dehydrogenase 1 OS=Staphylococcus aureus (strain MRSA252) OX=282458 GN=ald1 PE=3 SV=1	ald1	1	0.026433	60.547	K(1)LTDAGHK	2	-1.5829	1
Q6GGW9	246	K	Alanine dehydrogenase 1 OS=Staphylococcus aureus (strain MRSA252) OX=282458 GN=ald1 PE=3 SV=1	ald1	1	0.00036598	69.765	KADVFISTILIPGAK(1)PPK	3	0.92293	1
Q6GGW9	32	K	Alanine dehydrogenase 1 OS=Staphylococcus aureus (strain MRSA252) OX=282458 GN=ald1 PE=3 SV=1	ald1	1	6.90192e-07	114.63	LTDAGHK(1)VIVEK	2	0.78167	2
Q6GGW9	73	K	Alanine dehydrogenase 1 OS=Staphylococcus aureus (strain MRSA252) OX=282458 GN=ald1 PE=3 SV=1	ald1	1	0.025697	40.493	VK(1)EPHESEYQYFK	3	0.83384	1
Q6GGW9	37	K	Alanine dehydrogenase 1 OS=Staphylococcus aureus (strain MRSA252) OX=282458 GN=ald1 PE=3 SV=1	ald1	1	0.000112566	79.467	VIVEK(1)NAGIGSGFSNDMYEK	2	-0.55022	1
Q6GGW9	232	K	Alanine dehydrogenase 1 OS=Staphylococcus aureus (strain MRSA252) OX=282458 GN=ald1 PE=3 SV=1	ald1	0.999999	0.00149628	61.16	K(1)ADVFISTILIPGAKPPK	3	0.83751	1
Q6GHP2	598	K	Isoleucine--tRNA ligase OS=Staphylococcus aureus (strain MRSA252) OX=282458 GN=ileS PE=3 SV=1	ileS	1	0.0186479	54.668	MSK(1)SLGNVIVPDQVVK	2	2.3286	1
Q6GHP2	611	K	Isoleucine--tRNA ligase OS=Staphylococcus aureus (strain MRSA252) OX=282458 GN=ileS PE=3 SV=1	ileS	1	0.000658713	92.264	SLGNVIVPDQVVK(1)QK	2	-1.1027	1
Q6GJD0	151	K	50S ribosomal protein L1 OS=Staphylococcus aureus (strain MRSA252) OX=282458 GN=rplA PE=3 SV=1	rplA	1	0.0282113	74.376	K(1)AVEEIK	2	-2.2614	1
Q6GJD0	141	K	50S ribosomal protein L1 OS=Staphylococcus aureus (strain MRSA252) OX=282458 GN=rplA PE=3 SV=1	rplA	1	0.0156811	56.017	GLMPNPK(1)TGTVTMDVK	2	-2.2819	1
Q6GJD0	14	K	50S ribosomal protein L1 OS=Staphylococcus aureus (strain MRSA252) OX=282458 GN=rplA PE=3 SV=1	rplA	1	0.0118805	65.043	YQEAASK(1)VDR	2	1.9808	1
Q6GJD0	150	K	50S ribosomal protein L1 OS=Staphylococcus aureus (strain MRSA252) OX=282458 GN=rplA PE=3 SV=1	rplA	1	0.00141914	89.301	TGTVTMDVK(1)K	2	-0.39955	1
Q7X2S0	3	K	Clumping factor B (Fragment) OS=Staphylococcus aureus OX=1280 GN=clfB PE=4 SV=1	clfB	0.999487	0.0258952	42.426	MK(0.999)K(0.999)RIDYLSNK(0.002)QNK	2	-0.64809	1
Q7X2S0	2	K	Clumping factor B (Fragment) OS=Staphylococcus aureus OX=1280 GN=clfB PE=4 SV=1	clfB	0.998647	0.0258952	42.426	MK(0.999)K(0.999)RIDYLSNK(0.002)QNK	2	-0.64809	1
Q8NUK8	6	K	Ornithine carbamoyltransferase, catabolic OS=Staphylococcus aureus (strain MW2) OX=196620 GN=arcB PE=3 SV=1	arcB	1	0.00439884	85.554	TEIQK(1)PYDLK	2	2.1502	1
Q8NUK8	92	K	Ornithine carbamoyltransferase, catabolic OS=Staphylococcus aureus (strain MW2) OX=196620 GN=arcB PE=3 SV=1	arcB	1	0.0181263	70.552	NDIQLGK(1)K	2	-0.90863	1
Q8NVA9	269	K	Lipid II:glycine glycyltransferase OS=Staphylococcus aureus (strain MW2) OX=196620 GN=femX PE=3 SV=1	femX	1	0.0111549	57.288	K(1)AQNMINDAQNK	2	-0.72456	1
Q8NX44	40	K	Ornithine carbamoyltransferase OS=Staphylococcus aureus (strain MW2) OX=196620 GN=argF PE=3 SV=1	argF	1	0.0118171	71.085	YIGTEK(1)PMLK	2	-1.3542	1
Q8NX44	283	K	Ornithine carbamoyltransferase OS=Staphylococcus aureus (strain MW2) OX=196620 GN=argF PE=3 SV=1	argF	1	0.000306984	41.354	TGNPNVIFEHCLPSFHNADTK(1)IGQQIFEK	4	-0.45183	1
Q8NX44	291	K	Ornithine carbamoyltransferase OS=Staphylococcus aureus (strain MW2) OX=196620 GN=argF PE=3 SV=1	argF	1	0.00774495	68.972	IGQQIFEK(1)YGIR	2	1.4305	1
Q8NXZ0	148	K	Lysine--tRNA ligase OS=Staphylococcus aureus (strain MW2) OX=196620 GN=lysS PE=3 SV=1	lysS	1	0.00383945	51.554	SLRPLPDK(1)FHGLQDIEQR	3	0.38956	1
Q8NYH4	103	K	Iron-sulfur cluster repair protein ScdA OS=Staphylococcus aureus (strain MW2) OX=196620 GN=scdA PE=3 SV=1	scdA	1	0.0208398	62.287	NLTPYVTK(1)LSK	2	0.089492	1
Q8NYH4	106	K	Iron-sulfur cluster repair protein ScdA OS=Staphylococcus aureus (strain MW2) OX=196620 GN=scdA PE=3 SV=1	scdA	1	0.00502228	47.75	LSK(1)VHGPNHPYLVELK	4	-2.1657	1
Q8NYH4	45	K	Iron-sulfur cluster repair protein ScdA OS=Staphylococcus aureus (strain MW2) OX=196620 GN=scdA PE=3 SV=1	scdA	1	0.00333305	73.386	K(1)NVDLNELLQR	2	1.0362	1
Q99UU0	266	K	Carbamate kinase 1 OS=Staphylococcus aureus (strain Mu50 / ATCC 700699) OX=158878 GN=arcC1 PE=3 SV=1	arcC1	1	0.00605734	69.188	YIDENQFAK(1)GSMLPK	2	-0.23905	1
Q99UU0	15	K	Carbamate kinase 1 OS=Staphylococcus aureus (strain Mu50 / ATCC 700699) OX=158878 GN=arcC1 PE=3 SV=1	arcC1	1	2.57649e-06	79.426	IVVALGGNALGK(1)SPQEQLELVK	3	2.3396	1
Q99WA2	42	K	L25 OS=Staphylococcus aureus (strain Mu50 / ATCC 700699) OX=158878 GN=rplY PE=3 SV=1	rplY	1	0.0159611	60.489	NVSVK(1)VDEVEFIK	2	0.55103	1
Q99WA2	37	K	50S ribosomal protein L25 OS=Staphylococcus aureus (strain Mu50 / ATCC 700699) OX=158878 GN=rplY PE=3 SV=1	rplY	1	1.7876e-17	138.97	VPAVVYGYGTK(1)NVSVK	3	-1.997	2
Q99WA2	68	K	50S ribosomal protein L25 OS=Staphylococcus aureus (strain Mu50 / ATCC 700699) OX=158878 GN=rplY PE=3 SV=1	rplY	1	0.00470614	78.95	NGVIELGVGSK(1)TIK	2	-2.7004	3
Q99WA2	5	K	50S ribosomal protein L25 OS=Staphylococcus aureus (strain Mu50 / ATCC 700699) OX=158878 GN=rplY PE=3 SV=1	rplY	1	0.0212523	85.533	ASLK(1)SIIR	2	0.92039	1
Q9AGS5	96	K	50S ribosomal protein L11 OS=Staphylococcus aureus OX=1280 GN=rplK PE=3 SV=1	rplK	1	0.0297049	77.062	TK(1)VATVTK	2	0.25322	1
Q9F0R1	18	K	HTH-type transcriptional regulator SarR OS=Staphylococcus aureus (strain NCTC 8325) OX=93061 GN=sarR PE=1 SV=3	sarR	1	0.000460597	73.928	INDINDLVNATFQVK(1)K	3	-1.5572	1
Q9FDP4	44	K	Uncharacterized protein OS=Staphylococcus aureus OX=1280 GN=DQV53_00015 PE=4 SV=1	DQV53_00015	1	0.00341923	76.679	K(1)MFIEILAK	2	1.5747	1
Q9KX07	53	K	Thioredoxin reductase (Fragment) OS=Staphylococcus aureus OX=1280 PE=3 SV=1		1	0.00807319	62.055	K(1)FGAVYQYGDIK	2	1.2419	1
R4R123	1166	K	DNA-directed RNA polymerase subunit beta (Fragment) OS=Staphylococcus aureus OX=1280 GN=rpoB PE=3 SV=1	rpoB	1	0.000112964	98.573	K(1)VDLQQNDAPETQK	2	-0.51123	1
T1Y5L6	208	K	L-lactate dehydrogenase OS=Staphylococcus aureus subsp. aureus CN1 OX=1193576 GN=ldh PE=3 SV=1	ldh	1	1.14945e-11	118.05	TLLEQRPEGK(1)AQIEQIFVQTR	3	-2.0569	1
T1Y5Y2	75	K	50S ribosomal protein L7/L12 OS=Staphylococcus aureus subsp. aureus CN1 OX=1193576 GN=rplL PE=3 SV=1	rplL	1	0.000150633	102.9	AVK(1)EATGLGLK	2	1.0136	2
T1Y6H5	21	K	30S ribosomal protein S7 OS=Staphylococcus aureus subsp. aureus CN1 OX=1193576 GN=rpsG PE=3 SV=1	rpsG	1	8.55096e-05	90.464	RDVLPDPIHNSK(1)LVTK	3	-1.572	1
T1Y6H5	136	K	30S ribosomal protein S7 OS=Staphylococcus aureus subsp. aureus CN1 OX=1193576 GN=rpsG PE=3 SV=1	rpsG	1	0.00114021	59.163	LANEILDAANNTGGAVK(1)K	3	2.3007	1
T1Y6M8	215	K	Glyceraldehyde-3-phosphate dehydrogenase OS=Staphylococcus aureus subsp. aureus CN1 OX=1193576 GN=SAKOR_00776 PE=3 SV=1	SAKOR_00776	1	0.00174817	67.76	AAAENIIPNSTGAAK(1)AIGK	2	-0.93288	2
T1Y6M8	116	K	Glyceraldehyde-3-phosphate dehydrogenase OS=Staphylococcus aureus subsp. aureus CN1 OX=1193576 GN=SAKOR_00776 PE=3 SV=1	SAKOR_00776	1	0.00939621	46.249	K(1)VLISAPATGDLK	2	1.1407	1
T1Y6M8	219	K	Glyceraldehyde-3-phosphate dehydrogenase OS=Staphylococcus aureus subsp. aureus CN1 OX=1193576 GN=SAKOR_00776 PE=3 SV=1	SAKOR_00776	1	0.0261082	56.527	AIGK(1)VIPEIDGK	2	2.0176	1
T1Y6M8	105	K	Glyceraldehyde-3-phosphate dehydrogenase OS=Staphylococcus aureus subsp. aureus CN1 OX=1193576 GN=SAKOR_00776 PE=3 SV=1	SAKOR_00776	1	2.38424e-08	136.63	DK(1)AQAHIEAGAK	2	-0.23071	1
T1Y6M8	115	K	Glyceraldehyde-3-phosphate dehydrogenase OS=Staphylococcus aureus subsp. aureus CN1 OX=1193576 GN=SAKOR_00776 PE=3 SV=1	SAKOR_00776	1	0.00436743	69.261	AQAHIEAGAK(1)K	2	-0.37751	1
T1Y764	167	K	ATP-dependent Clp protease proteolytic subunit OS=Staphylococcus aureus subsp. aureus CN1 OX=1193576 GN=clpP PE=3 SV=1	clpP	1	4.50997e-06	102.07	IQK(1)DTDRDNFLTAEEAK	3	0.87183	1
T1Y7S0	3	K	50S ribosomal protein L28 OS=Staphylococcus aureus subsp. aureus CN1 OX=1193576 GN=rpmB PE=3 SV=1	rpmB	1	0.0023358	113.99	GK(1)QCFVTGR	2	-0.94541	1
T1Y7U3	271	K	Dihydrolipoamide acetyltransferase component of pyruvate dehydrogenase complex OS=Staphylococcus aureus subsp. aureus CN1 OX=1193576 GN=SAKOR_01017 PE=3 SV=1	SAKOR_01017	1	6.4562e-07	91.589	K(1)YPALNTSFNEEAGEIVHK	3	0.30313	1
T1Y7U3	243	K	Dihydrolipoamide acetyltransferase component of pyruvate dehydrogenase complex OS=Staphylococcus aureus subsp. aureus CN1 OX=1193576 GN=SAKOR_01017 PE=3 SV=1	SAKOR_01017	0.814684	0.00142094	70.47	K(0.815)FK(0.185)EIAAEQGTK	3	-0.056777	1
T1Y7U3	87	K	Dihydrolipoamide acetyltransferase component of pyruvate dehydrogenase complex OS=Staphylococcus aureus subsp. aureus CN1 OX=1193576 GN=SAKOR_01017 PE=3 SV=1	SAKOR_01017	1	2.14544e-08	96.052	IDAPDAEDMQFK(1)GHDDDSSSK	3	-0.24872	1
T1Y7U3	245	K	Dihydrolipoamide acetyltransferase component of pyruvate dehydrogenase complex OS=Staphylococcus aureus subsp. aureus CN1 OX=1193576 GN=SAKOR_01017 PE=3 SV=1	SAKOR_01017	0.961685	6.88424e-05	106.38	K(0.038)FK(0.962)EIAAEQGTK	2	0.11845	1
T1Y7U3	214	K	Dihydrolipoamide acetyltransferase component of pyruvate dehydrogenase complex OS=Staphylococcus aureus subsp. aureus CN1 OX=1193576 GN=SAKOR_01017 PE=3 SV=1	SAKOR_01017	1	0.00898964	76.165	AIAK(1)AMVNSK	2	0.6926	1
T1Y7U3	417	K	Dihydrolipoamide acetyltransferase component of pyruvate dehydrogenase complex OS=Staphylococcus aureus subsp. aureus CN1 OX=1193576 GN=SAKOR_01017 PE=3 SV=1	SAKOR_01017	1	0.00145621	61.477	QIDGATGQNAMNHIK(1)R	3	2.3822	1
T1Y861	369	K	Cell division protein FtsZ OS=Staphylococcus aureus subsp. aureus CN1 OX=1193576 GN=ftsZ PE=3 SV=1	ftsZ	1	0.00290284	65.949	THTTK(1)EDDIPSFIR	3	2.0535	1
T1Y861	325	K	Cell division protein FtsZ OS=Staphylococcus aureus subsp. aureus CN1 OX=1193576 GN=ftsZ PE=3 SV=1	ftsZ	1	8.60197e-53	189.52	K(1)SGSTGFGTSVNTSSNATSK	2	-1.0238	1
T1Y978	99	K	Universal stress protein OS=Staphylococcus aureus subsp. aureus CN1 OX=1193576 GN=SAKOR_01651 PE=3 SV=1	SAKOR_01651	1	8.90416e-09	84.509	K(1)LAHEINADLIMSGTSGLNAVER	3	-0.26621	2
T1Y978	61	K	Universal stress protein OS=Staphylococcus aureus subsp. aureus CN1 OX=1193576 GN=SAKOR_01651 PE=3 SV=1	SAKOR_01651	1	0.0244663	41.088	SK(1)HFAEELLNGYK	3	2.4088	1
T1Y9R0	30	K	Acetate kinase OS=Staphylococcus aureus subsp. aureus CN1 OX=1193576 GN=ackA PE=3 SV=1	ackA	1	3.23371e-07	115.12	MPEEELVTK(1)GLIER	2	-2.0723	1
T1YA07	21	K	Acyl carrier protein OS=Staphylococcus aureus subsp. aureus CN1 OX=1193576 GN=acpP PE=3 SV=1	acpP	1	3.2022e-26	124.99	LGVDADK(1)VTEDASFK	2	4.1663	1
T1YA45	408	K	Trigger factor OS=Staphylococcus aureus subsp. aureus CN1 OX=1193576 GN=tig PE=3 SV=1	tig	1	0.0112624	62.94	NTLGNTDIIK(1)NDVR	2	-2.4083	1
T1YA45	33	K	Trigger factor OS=Staphylococcus aureus subsp. aureus CN1 OX=1193576 GN=tig PE=3 SV=1	tig	1	0.0171914	45.368	ALDQAFK(1)K	2	1.0538	1
T1YA45	37	K	Trigger factor OS=Staphylococcus aureus subsp. aureus CN1 OX=1193576 GN=tig PE=3 SV=1	tig	1	0.0178297	64.121	VVK(1)QINVPGFR	2	-2.1721	1
T1YA45	23	K	Trigger factor OS=Staphylococcus aureus subsp. aureus CN1 OX=1193576 GN=tig PE=3 SV=1	tig	0.999965	0.00433054	46.46	KEGNEGLLTVTVPAEK(1)VNK	3	2.6441	1
T1YA47	63	K	Fumarate hydratase class II OS=Staphylococcus aureus subsp. aureus CN1 OX=1193576 GN=fumC PE=3 SV=1	fumC	1	0.00552	68.088	AAALANFDLGK(1)LSEAK	2	0.5383	1
T1YAQ4	149	K	30S ribosomal protein S3 OS=Staphylococcus aureus subsp. aureus CN1 OX=1193576 GN=rpsC PE=3 SV=1	rpsC	1	0.000932854	87.568	GIK(1)TQVSGR	2	1.6736	1
T1YAQ4	85	K	30S ribosomal protein S3 OS=Staphylococcus aureus subsp. aureus CN1 OX=1193576 GN=rpsC PE=3 SV=1	rpsC	1	0.0188987	70.942	GGSEIEK(1)LR	2	-1.755	1
T1YAQ4	134	K	30S ribosomal protein S3 OS=Staphylococcus aureus subsp. aureus CN1 OX=1193576 GN=rpsC PE=3 SV=1	rpsC	1	0.018654	94.309	VQK(1)QAITR	2	1.3651	1
T1YAQ4	210	K	30S ribosomal protein S3 OS=Staphylococcus aureus subsp. aureus CN1 OX=1193576 GN=rpsC PE=3 SV=1	rpsC	1	0.00214694	88.385	GEVLPTK(1)NTSGGGK	2	1.4895	1
T1YAQ4	97	K	30S ribosomal protein S3 OS=Staphylococcus aureus subsp. aureus CN1 OX=1193576 GN=rpsC PE=3 SV=1	rpsC	1	0.000135653	109.44	K(1)VHINVIEIK	2	1.0857	2
T1YAQ4	78	K	30S ribosomal protein S3 OS=Staphylococcus aureus subsp. aureus CN1 OX=1193576 GN=rpsC PE=3 SV=1	rpsC	1	9.16575e-17	135.23	PGMVIGK(1)GGSEIEK	2	0.84203	2
T1YAV5	27	K	Biotin carboxyl carrier protein of acetyl-CoA carboxylase OS=Staphylococcus aureus subsp. aureus CN1 OX=1193576 GN=SAKOR_01474 PE=4 SV=1	SAKOR_01474	1	2.23503e-05	66.068	STLTEINIEDTK(1)GK	2	1.6736	1
T1YBA9	59	K	50S ribosomal protein L14 OS=Staphylococcus aureus subsp. aureus CN1 OX=1193576 GN=rplN PE=3 SV=1	rplN	0.999998	0.00635874	84.759	KGDVVK(1)AVIVR	2	-0.21692	3
T1YBA9	53	K	50S ribosomal protein L14 OS=Staphylococcus aureus subsp. aureus CN1 OX=1193576 GN=rplN PE=3 SV=1	rplN	1	0.0319815	49.448	NATPGGVVK(1)K	2	1.2603	1
T1YBK5	202	K	Hydroxymethylglutaryl-CoA synthase OS=Staphylococcus aureus subsp. aureus CN1 OX=1193576 GN=SAKOR_02536 PE=4 SV=1	SAKOR_02536	1	0.00264012	81.157	YPLVDGALSK(1)DAYIR	2	1.6753	1
T1YBK5	242	K	Hydroxymethylglutaryl-CoA synthase OS=Staphylococcus aureus subsp. aureus CN1 OX=1193576 GN=SAKOR_02536 PE=4 SV=1	SAKOR_02536	1	5.54943e-44	186.9	K(1)ALESIIDNADETTQER	2	0.74643	2
T1YBP9	46	K	50S ribosomal protein L17 OS=Staphylococcus aureus subsp. aureus CN1 OX=1193576 GN=rplQ PE=3 SV=1	rplQ	1	0.0314201	56.569	SVVEK(1)LITLGK	2	0.18333	1
T1YCD9	7	K	50S ribosomal protein L15 OS=Staphylococcus aureus subsp. aureus CN1 OX=1193576 GN=rplO PE=3 SV=1	rplO	1	0.0148996	46.73	LHELK(1)PAEGSR	3	-0.64907	1
T1YCT6	29	K	Putative cytosolic protein OS=Staphylococcus aureus subsp. aureus CN1 OX=1193576 GN=SAKOR_02139 PE=4 SV=1	SAKOR_02139	1	0.00142672	57.692	IPTSEIK(1)NITQDQDIHAVPK	3	0.82695	1
T1YCX6	8	K	50S ribosomal protein L36 OS=Staphylococcus aureus subsp. aureus CN1 OX=1193576 GN=rpmJ PE=3 SV=1	rpmJ	1	0.00240927	92.265	VRPSVK(1)PICEK	2	-0.32257	1
T1YD05	97	K	Arginine deiminase OS=Staphylococcus aureus subsp. aureus CN1 OX=1193576 GN=arcA PE=3 SV=1	arcA	1	1.42399e-07	135.86	K(1)TILGHEEEIK	3	0.012485	2
T1YD05	256	K	Arginine deiminase OS=Staphylococcus aureus subsp. aureus CN1 OX=1193576 GN=arcA PE=3 SV=1	arcA	1	0.00301469	75.102	IFENPQATFK(1)K	2	0.24565	1
T1YD05	16	K	Arginine deiminase OS=Staphylococcus aureus subsp. aureus CN1 OX=1193576 GN=arcA PE=3 SV=1	arcA	1	0.0108058	63.691	VNSEIGALK(1)TVLLK	2	-1.0033	1
T1YD05	257	K	Arginine deiminase OS=Staphylococcus aureus subsp. aureus CN1 OX=1193576 GN=arcA PE=3 SV=1	arcA	1	0.00112975	86.944	K(1)VVAIEIPTSR	2	-0.49375	1
T1YD05	242	K	Arginine deiminase OS=Staphylococcus aureus subsp. aureus CN1 OX=1193576 GN=arcA PE=3 SV=1	arcA	1	3.67078e-10	153.81	TSAQAIEK(1)LAR	2	-0.77444	5
W0G6J3	123	K	Alkaline shock protein 23 (Fragment) OS=Staphylococcus aureus OX=1280 GN=asp23 PE=4 SV=1	asp23	1	7.30655e-06	116.58	VTELVK(1)EQVK	2	0.41871	2
W0G6J3	39	K	Alkaline shock protein 23 (Fragment) OS=Staphylococcus aureus OX=1280 GN=asp23 PE=4 SV=1	asp23	1	0.0119855	64.52	QQEQNQEPQFK(1)NK	2	0.92747	1
W0G6J3	28	K	Alkaline shock protein 23 (Fragment) OS=Staphylococcus aureus OX=1280 GN=asp23 PE=4 SV=1	asp23	1	4.28385e-11	132.08	QK(1)QQEQNQEPQFK	2	-0.2034	1
W0G6J3	113	K	Alkaline shock protein 23 (Fragment) OS=Staphylococcus aureus OX=1280 GN=asp23 PE=4 SV=1	asp23	1	6.66405e-07	109.79	VILEYGESAPK(1)IFR	3	1.0615	2
W5TZ48	9	K	Neomycin phosphotransferase III (Fragment) OS=Staphylococcus aureus OX=1280 PE=4 SV=1		1	0.0315508	54.812	CVK(1)DTEGMSPAK	2	-1.6898	1
W8TMZ7	16	K	Glutamate dehydrogenase OS=Staphylococcus aureus OX=1280 GN=gudB PE=3 SV=1	gudB	1	0.00490281	45.579	TENNNLVTSTQGIIK(1)EALHK	3	0.95298	1
W8TQ45	33	K	50S ribosomal protein L9 OS=Staphylococcus aureus OX=1280 GN=rplI PE=3 SV=1	rplI	1	9.31166e-07	107.5	K(1)NYAVEATPGNLK	2	0.7316	1
W8TQ45	88	K	50S ribosomal protein L9 OS=Staphylococcus aureus OX=1280 GN=rplI PE=3 SV=1	rplI	1	0.00810878	68.123	TGEGGK(1)LFGSVSTK	2	1.9047	1
W8TQ45	96	K	50S ribosomal protein L9 OS=Staphylococcus aureus OX=1280 GN=rplI PE=3 SV=1	rplI	1	0.00223389	82.877	LFGSVSTK(1)QIAEALK	2	-2.3337	1
W8TQ45	135	K	50S ribosomal protein L9 OS=Staphylococcus aureus OX=1280 GN=rplI PE=3 SV=1	rplI	1	0.0264728	53.869	LDK(1)EVEGTIR	2	-3.344	1
W8TRE5	22	K	Adenylate kinase OS=Staphylococcus aureus OX=1280 GN=adk PE=3 SV=1	adk	1	0.00968649	65.295	GTQASEIVK(1)K	2	1.3388	1
W8TRE5	40	K	Adenylate kinase OS=Staphylococcus aureus OX=1280 GN=adk PE=3 SV=1	adk	1	0.00526777	83.137	AIK(1)EETELGK	2	0.78063	1
W8TRE5	79	K	Adenylate kinase OS=Staphylococcus aureus OX=1280 GN=adk PE=3 SV=1	adk	1	0.00391622	77.185	K(1)GFLLDGFPR	2	2.067	1
W8TRT9	74	K	Elongation factor Tu OS=Staphylococcus aureus OX=1280 GN=tufA PE=3 SV=1	tufA	1	1.66369e-25	163.44	GITINTSHIEYQTDK(1)R	3	0.99806	1
W8TRT9	10	K	Elongation factor Tu OS=Staphylococcus aureus OX=1280 GN=tufA PE=3 SV=1	tufA	1	3.28525e-08	110.75	SK(1)EHANIGTIGHVDHGK	3	0.33311	2
W8TRT9	264	K	Elongation factor Tu OS=Staphylococcus aureus OX=1280 GN=tufA PE=3 SV=1	tufA	1	9.1259e-05	89.663	K(1)LLDYAEAGDNIGALLR	3	-0.19998	2
W8TRT9	314	K	Elongation factor Tu OS=Staphylococcus aureus OX=1280 GN=tufA PE=3 SV=1	tufA	1	0.00807926	68.481	AEVYVLSK(1)DEGGR	2	2.1704	2
W8TRW6	46	K	Cysteine synthase OS=Staphylococcus aureus OX=1280 GN=cysK PE=3 SV=1	cysK	1	0.0012669	90.561	LEYQNPGGSVK(1)DR	2	-1.9071	1
W8TRX1	87	K	Polyribonucleotide nucleotidyltransferase OS=Staphylococcus aureus OX=1280 GN=yabR PE=4 SV=1	yabR	0.999995	0.000485806	88.19	QHTSK(1)PSHQKPVQK	3	1.7194	1
W8TRX1	18	K	Polyribonucleotide nucleotidyltransferase OS=Staphylococcus aureus OX=1280 GN=yabR PE=4 SV=1	yabR	1	0.00253561	73.296	K(1)FGAFVELPEGK	2	-1.6064	1
W8TS62	164	K	Probable manganese-dependent inorganic pyrophosphatase OS=Staphylococcus aureus OX=1280 GN=ppaC PE=3 SV=1	ppaC	1	6.94426e-18	142.88	SPTCTQQDVK(1)AAEELK	2	0.78266	1
W8TS62	297	K	Probable manganese-dependent inorganic pyrophosphatase OS=Staphylococcus aureus OX=1280 GN=ppaC PE=3 SV=1	ppaC	1	0.00794676	59.345	K(1)QIVPQITEALTK	2	1.8837	2
W8TSM8	6	K	Formate C-acetyltransferase OS=Staphylococcus aureus OX=1280 GN=pflB PE=4 SV=1	pflB	1	0.000593145	78.674	MLETNK(1)NHATAWQGFK	3	-0.23254	1
W8TSM8	610	K	Formate C-acetyltransferase OS=Staphylococcus aureus OX=1280 GN=pflB PE=4 SV=1	pflB	1	1.85368e-23	140.63	K(1)TGNTPDGR	2	-0.8154	1
W8TSM8	162	K	Formate C-acetyltransferase OS=Staphylococcus aureus OX=1280 GN=pflB PE=4 SV=1	pflB	1	0.000737168	90.422	K(1)AGVITGLPDAYGR	2	0.22017	2
W8TUB4	74	K	50S ribosomal protein L23 OS=Staphylococcus aureus OX=1280 GN=rplW PE=1 SV=1	rplW	1	0.00956945	87.806	YQGYTNK(1)R	2	-1.8971	1
W8TUC3	18	K	50S ribosomal protein L5 OS=Staphylococcus aureus OX=1280 GN=rplE PE=1 SV=1	rplE	1	0.00805907	54.402	FNTEVTENLMK(1)K	2	1.7868	1
W8TUC3	19	K	50S ribosomal protein L5 OS=Staphylococcus aureus OX=1280 GN=rplE PE=1 SV=1	rplE	1	0.00391612	63.062	K(1)FNYSSVMEVPK	2	-1.2393	1
W8TUM1	109	K	UDP-N-acetylglucosamine 1-carboxyvinyltransferase OS=Staphylococcus aureus OX=1280 GN=murZ PE=3 SV=1	murZ	1	0.0063872	57.525	K(1)CVIGLPGGCPLGPR	2	-1.5715	1
W8TV52	56	K	Ferritin OS=Staphylococcus aureus OX=1280 GN=ftnA PE=3 SV=1	ftnA	1	0.012167	48.216	FHGQK(1)IYNYINDR	3	-4.1875	1
W8TV55	142	K	Methionine aminopeptidase OS=Staphylococcus aureus OX=1280 GN=map_1 PE=3 SV=1	map_1	0.999425	0.00371324	49.988	VK(0.001)PGTK(0.999)LSNIGK	2	-1.7996	1
W8TV55	148	K	Methionine aminopeptidase OS=Staphylococcus aureus OX=1280 GN=map_1 PE=3 SV=1	map_1	1	0.0115187	50.966	LSNIGK(1)AVHNTAR	3	-0.071892	1
W8TVK2	43	K	30S ribosomal protein S4 OS=Staphylococcus aureus OX=1280 GN=rpsD PE=1 SV=1	rpsD	1	0.0038095	77.597	K(1)LSEYGLQLR	2	1.0913	1
W8TVL7	83	K	ATP-dependent 6-phosphofructokinase OS=Staphylococcus aureus OX=1280 GN=pfkA PE=3 SV=1	pfkA	1	0.0291386	57.347	K(1)VAIENLR	2	1.1977	1
W8TVL7	289	K	ATP-dependent 6-phosphofructokinase OS=Staphylococcus aureus OX=1280 GN=pfkA PE=3 SV=1	pfkA	1	0.0229212	62.582	GVGIK(1)NNK	2	0.61332	1
W8TVM8	127	K	Threonine--tRNA ligase OS=Staphylococcus aureus OX=1280 GN=thrS PE=3 SV=1	thrS	1	0.00370283	82.069	TMK(1)QIVNENMK	2	-2.4818	1
W8TVM8	212	K	Threonine--tRNA ligase OS=Staphylococcus aureus OX=1280 GN=thrS PE=3 SV=1	thrS	1	0.00681698	71.085	GDSNNK(1)MLQR	2	-1.5587	1
W8TZY6	46	K	2-oxoisovalerate dehydrogenase OS=Staphylococcus aureus OX=1280 GN=pdhB PE=4 SV=1	pdhB	1	1.44757e-07	118.21	VTEGLQK(1)EFGEDR	2	1.9727	1
W8U1R6	162	K	Alkyl hydroperoxide reductase C OS=Staphylococcus aureus OX=1280 GN=ahpC PE=3 SV=1	ahpC	1	3.89821e-08	148.13	K(1)NPGEVCPAK	2	-0.96884	1
W8U1R6	171	K	Alkyl hydroperoxide reductase C OS=Staphylococcus aureus OX=1280 GN=ahpC PE=3 SV=1	ahpC	1	2.70109e-11	122.01	NPGEVCPAK(1)WEEGAK	2	0.38599	3
W8U3W0	71	K	50S ribosomal protein L3 OS=Staphylococcus aureus OX=1280 GN=rplC PE=1 SV=1	rplC	1	0.0136714	45.653	YANK(1)PAEGHAK	3	2.2393	1
W8U3W0	78	K	50S ribosomal protein L3 OS=Staphylococcus aureus OX=1280 GN=rplC PE=1 SV=1	rplC	0.999998	6.54567e-05	70.889	YANKPAEGHAK(1)K	3	2.5449	1
W8U3X2	132	K	50S ribosomal protein L6 OS=Staphylococcus aureus OX=1280 GN=rplF PE=1 SV=1	rplF	1	0.0082806	70.598	NTVVK(1)VEGISK	2	1.3644	1
W8U3X2	101	K	50S ribosomal protein L6 OS=Staphylococcus aureus OX=1280 GN=rplF PE=1 SV=1	rplF	1	0.000336298	65.149	AQMQGK(1)DLILNVGYSHPVEIK	3	0.51682	1
W8U472	133	K	ATP synthase subunit delta OS=Staphylococcus aureus OX=1280 GN=atpH PE=3 SV=1	atpH	1	0.0138274	52.495	LVTQQTK(1)LSK	2	0.010365	1
W8U472	126	K	ATP synthase subunit delta OS=Staphylococcus aureus OX=1280 GN=atpH PE=3 SV=1	atpH	1	0.00811255	77.74	IVK(1)LVTQQTK	2	0.075981	1
W8U570	98	K	3-deoxy-7-phosphoheptulonate synthase OS=Staphylococcus aureus OX=1280 GN=aroA_2 PE=4 SV=1	aroA_2	0.895168	0.000132179	64.574	K(0.895)LK(0.105)PEDTIVTFDNGGIIGDGNK	3	2.9397	1
W8U595	14	K	Putative transcription factor OS=Staphylococcus aureus OX=1280 GN=uspA_1 PE=4 SV=1	uspA_1	1	3.3949e-11	123.02	NILLGVDTQLK(1)NEK	2	-2.0128	1
W8U5G0	93	K	Arsenate reductase OS=Staphylococcus aureus OX=1280 GN=spxA_2 PE=3 SV=1	spxA_2	1	0.00980058	56.514	LELLSSDGMLVK(1)R	2	-1.5492	1
W8U5G0	55	K	Arsenate reductase OS=Staphylococcus aureus OX=1280 GN=spxA_2 PE=3 SV=1	spxA_2	1	0.00475893	46.065	TIIANTGVEINK(1)LFNTHGAK	3	-1.689	1
W8U5T9	67	K	DNA-binding protein OS=Staphylococcus aureus OX=1280 GN=hu PE=3 SV=1	hu	1	1.70043e-37	194.05	NPQTGK(1)EIDIPASK	2	0.54453	2
W8U5T9	18	K	DNA-binding protein OS=Staphylococcus aureus OX=1280 GN=hu PE=3 SV=1	hu	1	6.65644e-21	150.68	TDLINAVAEQADLTK(1)K	2	2.0961	3
W8U6H8	13	K	30S ribosomal protein S15 OS=Staphylococcus aureus OX=1280 GN=rpsO PE=1 SV=1	rpsO	1	2.63392e-06	99.752	KNEIIK(1)EYR	2	0.71502	2
W8U7S8	464	K	Probable malate:quinone oxidoreductase OS=Staphylococcus aureus OX=1280 GN=mqo2 PE=3 SV=1	mqo2	1	0.00307633	59.342	K(1)MIPSYGESLIEDEK	2	-2.5033	1
W8U8T8	33	K	30S ribosomal protein S8 OS=Staphylococcus aureus OX=1280 GN=rpsH PE=1 SV=1	rpsH	1	0.00560572	53.557	LELPASNIK(1)K	2	-0.79709	1
W8U8T8	24	K	30S ribosomal protein S8 OS=Staphylococcus aureus OX=1280 GN=rpsH PE=1 SV=1	rpsH	1	1.75534e-07	126.16	HEK(1)LELPASNIK	2	-1.946	1
W8U8T8	47	K	30S ribosomal protein S8 OS=Staphylococcus aureus OX=1280 GN=rpsH PE=1 SV=1	rpsH	1	5.12994e-24	167.14	SEGFIK(1)NVEYVEDDK	2	-1.5196	1
W8U8U6	114	K	30S ribosomal protein S13 OS=Staphylococcus aureus OX=1280 GN=rpsM PE=1 SV=1	rpsM	0.999824	0.000756502	126.83	KGPVK(1)TVANK	2	0.66853	1
W8U942	71	K	Uracil phosphoribosyltransferase OS=Staphylococcus aureus OX=1280 GN=upp PE=3 SV=1	upp	1	0.00828178	72.2	K(1)LAIVPILR	2	-2.4222	1
W8U942	110	K	Uracil phosphoribosyltransferase OS=Staphylococcus aureus OX=1280 GN=upp PE=3 SV=1	upp	1	0.0128117	63.682	DPETLK(1)AVEYFAK	2	-0.035526	1
W8UAF4	381	K	Glycine--tRNA ligase OS=Staphylococcus aureus OX=1280 GN=glyS PE=3 SV=1	glyS	1	0.017773	71.085	K(1)LSGEAIK	2	-0.071353	1
W8UAF4	193	K	Glycine--tRNA ligase OS=Staphylococcus aureus OX=1280 GN=glyS PE=3 SV=1	glyS	1	0.003433	72.848	K(1)LPFGIGQIGK	2	-1.248	1
W8UAF4	380	K	Glycine--tRNA ligase OS=Staphylococcus aureus OX=1280 GN=glyS PE=3 SV=1	glyS	1	0.015392	63.212	AAILPLSK(1)K	2	1.5529	1
W8UB98	324	K	Polyribonucleotide nucleotidyltransferase OS=Staphylococcus aureus OX=1280 GN=pnpA PE=3 SV=1	pnpA	1	0.00437443	52.451	K(1)PDEIRPLDSEVGILPR	3	1.5624	1
W8UB98	685	K	Polyribonucleotide nucleotidyltransferase OS=Staphylococcus aureus OX=1280 GN=pnpA PE=3 SV=1	pnpA	1	0.00229088	113.69	ITEIDK(1)QGR	2	1.0258	1
W8URN4	92	K	Dihydrolipoyl dehydrogenase OS=Staphylococcus aureus OX=1280 GN=lpdA PE=3 SV=1	lpdA	1	0.00337728	83.204	VQEFK(1)SSVVNK	2	2.2384	1
W8URN4	158	K	Dihydrolipoyl dehydrogenase OS=Staphylococcus aureus OX=1280 GN=lpdA PE=3 SV=1		1	0.00565198	77.185	PIEIPNFK(1)FGK	2	0.52581	1
W8URN4	98	K	Dihydrolipoyl dehydrogenase OS=Staphylococcus aureus OX=1280 GN=lpdA PE=3 SV=1	lpdA	1	0.0319497	48.616	SSVVNK(1)LTGGVEGLLK	2	2.2259	1
W8URN4	34	K	Dihydrolipoyl dehydrogenase OS=Staphylococcus aureus OX=1280 GN=lpdA PE=3 SV=1	lpdA	1	0.00724072	69.331	AAQLGQK(1)VTIVEK	2	0.88864	1
W8URN4	56	K	Dihydrolipoyl dehydrogenase OS=Staphylococcus aureus OX=1280 GN=lpdA PE=3 SV=1	lpdA	1	1.68519e-05	66.828	GNLGGVCLNVGCIPSK(1)ALLHASHR	4	0.76373	1
W8URN4	379	K	Dihydrolipoyl dehydrogenase OS=Staphylococcus aureus OX=1280 GN=lpdA PE=3 SV=1	lpdA	1	0.00733922	52.576	ASK(1)FPYAANGR	2	-0.89214	1
W8URN4	133	K	Dihydrolipoyl dehydrogenase OS=Staphylococcus aureus OX=1280 GN=lpdA PE=3 SV=1	lpdA	1	8.55116e-14	146.77	VMDEK(1)SAQTYNFK	2	0.64978	1
W8USY9	222	K	Phosphate acetyltransferase OS=Staphylococcus aureus OX=1280 GN=eutD PE=4 SV=1	eutD	1	0.00494183	78.964	VQEAVK(1)LAQQK	2	1.5785	1
W8UT26	495	K	Elongation factor G OS=Staphylococcus aureus OX=1280 GN=fusA PE=3 SV=1	fusA	1	3.41809e-06	120.84	SSAQVQGK(1)FSR	2	1.2837	1
W8UT26	688	K	Elongation factor G OS=Staphylococcus aureus OX=1280 GN=fusA PE=3 SV=1	fusA	1	0.0189532	59.418	SIAEDIIK(1)K	2	-0.67794	1
W8UT26	342	K	Elongation factor G OS=Staphylococcus aureus OX=1280 GN=fusA PE=3 SV=1	fusA	1	2.26493e-12	130.36	VYSGTMTSGSYVK(1)NSTK	2	-0.2751	2
W8UTF4	12	K	Transcriptional regulator OS=Staphylococcus aureus OX=1280 GN=BN1321_80096 PE=4 SV=1	BN1321_80096	1	0.003265	58.107	TK(1)HNLEIDELAQQLNEK	3	0.92111	1
W8UVN7	3	K	50S ribosomal protein L30 OS=Staphylococcus aureus OX=1280 GN=rpmD PE=1 SV=1	rpmD	1	0.0214405	56.087	AK(1)LQITLTR	2	-1.6386	1
W8UVN7	30	K	50S ribosomal protein L30 OS=Staphylococcus aureus OX=1280 GN=rpmD PE=1 SV=1	rpmD	1	5.12139e-05	100.97	K(1)TNSSVVVEDNPAIR	2	1.2886	1
W8UVN7	51	K	50S ribosomal protein L30 OS=Staphylococcus aureus OX=1280 GN=rpmD PE=1 SV=1	rpmD	1	0.000216967	129.37	VK(1)HLVTVEEK	2	-0.1193	1
W8UWZ6	145	K	DUF948 domain-containing protein OS=Staphylococcus aureus OX=1280 GN=ytxG PE=4 SV=1	ytxG	1	1.22724e-11	118.54	GSANYK(1)ANNVATDANHSYTSR	3	-0.22804	1
W8UX29	156	K	Pyruvate kinase OS=Staphylococcus aureus OX=1280 GN=pyk PE=3 SV=1	pyk	1	0.00132812	117.52	K(1)GVNLPGVR	2	-2.3421	1
W8UX29	68	K	Pyruvate kinase OS=Staphylococcus aureus OX=1280 GN=pyk PE=3 SV=1	pyk	1	0.000192881	100.43	IVAILLDTK(1)GPEIR	2	1.7742	1
W8UX29	341	K	Pyruvate kinase OS=Staphylococcus aureus OX=1280 GN=pyk PE=3 SV=1	pyk	1	9.67997e-18	143.67	NIAVSAEAAQDYK(1)K	2	-0.40583	1
W8UX29	425	K	Pyruvate kinase OS=Staphylococcus aureus OX=1280 GN=pyk PE=3 SV=1	pyk	1	4.82726e-37	168.55	K(1)STDALLNNAVATAVETGR	2	-1.4834	2
W8UXC3	36	K	30S ribosomal protein S20 OS=Staphylococcus aureus OX=1280 GN=rpsT PE=1 SV=1	rpsT	1	2.68383e-11	134.14	NAK(1)TAVSNNADNK	2	-0.65989	1
W8UXC3	70	K	30S ribosomal protein S20 OS=Staphylococcus aureus OX=1280 GN=rpsT PE=1 SV=1	rpsT	1	0.000131748	102.69	AAQSNLIHSNK(1)ADR	2	0.055271	1
X5E0H3	28	K	Uncharacterized protein OS=Staphylococcus aureus OX=1280 GN=BN1321_260262 PE=4 SV=1	BN1321_260262	1	4.13213e-17	141.99	DK(1)INEYTGSNNEEK	2	1.4283	1
X5E0H3	15	K	Uncharacterized protein OS=Staphylococcus aureus OX=1280 GN=BN1321_260262 PE=4 SV=1	BN1321_260262	1	3.34533e-11	112.95	FK(1)NSDNEQVK	2	-0.63458	1
X5EIY6	2	K	Rhodanese-like domain protein OS=Staphylococcus aureus OX=1280 GN=BTN44_03295 PE=4 SV=1	BTN44_03295	1	0.00402033	83.214	K(1)SITTDELK	2	-1.9613	1

## Sheet: pep_Ident
ID	Sequence	Length	Modifications	Modified sequence	Protein accession	Protein description	Charge	m/z	Mass error [ppm]	PEP	Score	MS/MS Count
0	AAADLLGQPLYK	12	Deamidation (NQ)	_AAADLLGQ(de)PLYK_	W8USI1	Enolase OS=Staphylococcus aureus OX=1280 GN=eno PE=3 SV=1	2	630.845	-1.1062	0.0053876	83.182	1
1	AAAENIIPNSTGAAK	15	Unmodified	_AAAENIIPNSTGAAK_	T1Y6M8	Glyceraldehyde-3-phosphate dehydrogenase OS=Staphylococcus aureus subsp. aureus CN1 OX=1193576 GN=SAKOR_00776 PE=3 SV=1	2	714.378	-0.46326	9.919e-05	97.797	1
2	AAAENIIPNSTGAAK	15	Unmodified	_AAAENIIPNSTGAAK_	T1Y6M8	Glyceraldehyde-3-phosphate dehydrogenase OS=Staphylococcus aureus subsp. aureus CN1 OX=1193576 GN=SAKOR_00776 PE=3 SV=1	2	714.378	-0.17891	0.0041443	68.044	1
3	AAAENIIPNSTGAAKAIGK	19	malon(K)	_AAAENIIPNSTGAAK(ma)AIGK_	T1Y6M8	Glyceraldehyde-3-phosphate dehydrogenase OS=Staphylococcus aureus subsp. aureus CN1 OX=1193576 GN=SAKOR_00776 PE=3 SV=1	3	628.334	-0.65719	0.0046646	50.255	1
4	AAAENIIPNSTGAAKAIGK	19	malon(K)	_AAAENIIPNSTGAAK(ma)AIGK_	T1Y6M8	Glyceraldehyde-3-phosphate dehydrogenase OS=Staphylococcus aureus subsp. aureus CN1 OX=1193576 GN=SAKOR_00776 PE=3 SV=1	2	941.997	-0.93188	0.0017482	67.76	1
5	AAALANFDLGKLSEAK	16	malon(K)	_AAALANFDLGK(ma)LSEAK_	T1YA47	Fumarate hydratase class II OS=Staphylococcus aureus subsp. aureus CN1 OX=1193576 GN=fumC PE=3 SV=1	2	852.944	0.53767	0.00552	68.088	1
6	AACEAYGYELDEETEK	16	Unmodified	_AACEAYGYELDEETEK_	W8TSM8	Formate C-acetyltransferase OS=Staphylococcus aureus OX=1280 GN=pflB PE=4 SV=1	3	626.596	0.99412	2.627e-06	105.17	1
7	AACEAYGYELDEETEK	16	Unmodified	_AACEAYGYELDEETEK_	W8TSM8	Formate C-acetyltransferase OS=Staphylococcus aureus OX=1280 GN=pflB PE=4 SV=1	2	939.391	0.28656	1.6256e-05	103.77	1
8	AAELELPLTK	10	Unmodified	_AAELELPLTK_	A0A380EG11	Peptide deformylase OS=Staphylococcus aureus OX=1280 GN=def PE=4 SV=1	2	542.816	-1.2508	0.00037872	101.3	1
9	AAEMLDKPIEDLR	13	Oxidation (M)	_AAEM(ox)LDKPIEDLR_	T1Y9R0	Acetate kinase OS=Staphylococcus aureus subsp. aureus CN1 OX=1193576 GN=ackA PE=3 SV=1	2	758.887	-0.90264	0.0089894	57.434	1
10	AAEMLDKPIEDLR	13	Unmodified	_AAEMLDKPIEDLR_	T1Y9R0	Acetate kinase OS=Staphylococcus aureus subsp. aureus CN1 OX=1193576 GN=ackA PE=3 SV=1	3	500.929	2.069	0.0052011	53.448	1
11	AAEMLDKPIEDLR	13	Unmodified	_AAEMLDKPIEDLR_	T1Y9R0	Acetate kinase OS=Staphylococcus aureus subsp. aureus CN1 OX=1193576 GN=ackA PE=3 SV=1	2	750.89	2.7495	0.00075836	94.781	1
12	AAFTVASIDLGAHPEFLGK	19	Unmodified	_AAFTVASIDLGAHPEFLGK_	Q8NUK8	Ornithine carbamoyltransferase, catabolic OS=Staphylococcus aureus (strain MW2) OX=196620 GN=arcB PE=3 SV=1	3	648.679	0.41276	1.6212e-06	86.8	1
13	AAGADFVK	8	Unmodified	_AAGADFVK_	A0A2X2K695	Deoxyribose-phosphate aldolase OS=Staphylococcus aureus OX=1280 GN=dra_2 PE=3 SV=1	2	389.708		0.029588	41.876	1
14	AAGADFVKTSTGFAGGGATAEDVK	24	Unmodified	_AAGADFVKTSTGFAGGGATAEDVK_	A0A2X2K695	Deoxyribose-phosphate aldolase OS=Staphylococcus aureus OX=1280 GN=dra_2 PE=3 SV=1	3	743.366	-0.44086	0.027847	22.257	1
15	AAGADFVKTSTGFAGGGATAEDVK	24	malon(K)	_AAGADFVK(ma)TSTGFAGGGATAEDVK_	A0A2X2K695	Deoxyribose-phosphate aldolase OS=Staphylococcus aureus OX=1280 GN=dra_2 PE=3 SV=1	3	772.033	-0.085407	2.7314e-06	71.651	1
16	AAGNNNELYK	10	Unmodified	_AAGNNNELYK_	A0A6B1RU84	Alpha/beta hydrolase OS=Staphylococcus aureus OX=1280 GN=GC242_07790 PE=4 SV=1	2	547.267	-0.55307	0.017183	51.436	1
17	AAIDTHGVGAGAVR	14	Unmodified	_AAIDTHGVGAGAVR_	A0A6B5DIH9	Glycine C-acetyltransferase OS=Staphylococcus aureus OX=1280 GN=G0Y59_09165 PE=4 SV=1	3	432.234	0.7031	0.015092	37.793	1
18	AAIEEAHK	8	Unmodified	_AAIEEAHK_	T1Y894	Hexulose-6-phosphate synthase OS=Staphylococcus aureus subsp. aureus CN1 OX=1193576 GN=SAKOR_00559 PE=4 SV=1	2	434.73	0.31587	0.012991	85.212	1
19	AAIISLTK	8	Unmodified	_AAIISLTK_	A0A380DTY4	Short-chain dehydrogenase OS=Staphylococcus aureus OX=1280 GN=yghA_2 PE=4 SV=1	2	408.763		0.031916	57.859	1
20	AAILPLSKK	9	malon(K)	_AAILPLSK(ma)K_	W8UAF4	Glycine--tRNA ligase OS=Staphylococcus aureus OX=1280 GN=glyS PE=3 SV=1	2	513.813	1.5498	0.015392	63.212	1
21	AAITTAETAASIK	13	Unmodified	_AAITTAETAASIK_	A0A6B1RKW5	Immunoglobulin-binding protein sbi OS=Staphylococcus aureus OX=1280 GN=GAY51_09490 PE=4 SV=1	2	624.346	1.7064	0.0067083	65.495	1
22	AAKPELAHTLNGSGLAVGR	19	Deamidation (NQ)	_AAKPELAHTLN(de)GSGLAVGR_	A0A0U1MFX6	Serine--tRNA ligase OS=Staphylococcus aureus OX=1280 GN=serS PE=3 SV=1	3	621.674	-0.41732	6.0164e-14	121.26	1
23	AAKPELAHTLNGSGLAVGR	19	Deamidation (NQ)	_AAKPELAHTLN(de)GSGLAVGR_	A0A0U1MFX6	Serine--tRNA ligase OS=Staphylococcus aureus OX=1280 GN=serS PE=3 SV=1	4	466.508	1.6663	0.0037148	43.326	1
24	AAKPELAHTLNGSGLAVGR	19	Deamidation (NQ)	_AAKPELAHTLN(de)GSGLAVGR_	A0A0U1MFX6	Serine--tRNA ligase OS=Staphylococcus aureus OX=1280 GN=serS PE=3 SV=1	3	621.674	0.90642	0.0002116	73.688	1
25	AAKPELAHTLNGSGLAVGR	19	Deamidation (NQ),malon(K)	_AAK(ma)PELAHTLN(de)GSGLAVGR_	A0A0U1MFX6	Serine--tRNA ligase OS=Staphylococcus aureus OX=1280 GN=serS PE=3 SV=1	3	650.341	0.72081	0.00080095	64.298	1
26	AAKPELAHTLNGSGLAVGR	19	Unmodified	_AAKPELAHTLNGSGLAVGR_	A0A0U1MFX6	Serine--tRNA ligase OS=Staphylococcus aureus OX=1280 GN=serS PE=3 SV=1	4	466.262	-2.4385	4.4724e-07	93.115	1
27	AAKPELAHTLNGSGLAVGR	19	Unmodified	_AAKPELAHTLNGSGLAVGR_	A0A0U1MFX6	Serine--tRNA ligase OS=Staphylococcus aureus OX=1280 GN=serS PE=3 SV=1	3	621.346	-2.162	0.00090775	60.764	1
28	AAKPELAHTLNGSGLAVGR	19	malon(K)	_AAK(ma)PELAHTLNGSGLAVGR_	A0A0U1MFX6	Serine--tRNA ligase OS=Staphylococcus aureus OX=1280 GN=serS PE=3 SV=1	3	650.013	-0.93898	1.8568e-11	119.68	1
29	AANTKVR	7	Acetyl (Protein N-term),Deamidation (NQ)	_(ac)AAN(de)TKVR_	A0A380DZ93	Putative NAD-dependent epimerase/dehydratase OS=Staphylococcus aureus OX=1280 GN=NCTC6133_03285 PE=4 SV=1	2	401.725	1.1665	0.025186	41.302	1
30	AAQLGQKVTIVEK	13	malon(K)	_AAQLGQK(ma)VTIVEK_	W8URN4	Dihydrolipoyl dehydrogenase OS=Staphylococcus aureus OX=1280 GN=lpdA PE=3 SV=1	2	735.912	0.88742	0.0072407	69.331	1
31	AAQSNLIHSNK	11	Unmodified	_AAQSNLIHSNK_	W8UXC3	30S ribosomal protein S20 OS=Staphylococcus aureus OX=1280 GN=rpsT PE=1 SV=1	3	394.879	1.0477	0.0033638	61.833	1
32	AAQSNLIHSNK	11	Unmodified	_AAQSNLIHSNK_	W8UXC3	30S ribosomal protein S20 OS=Staphylococcus aureus OX=1280 GN=rpsT PE=1 SV=1	2	591.815	1.343	1.6439e-06	123.67	1
33	AAQSNLIHSNKADR	14	malon(K)	_AAQSNLIHSNK(ma)ADR_	W8UXC3	30S ribosomal protein S20 OS=Staphylococcus aureus OX=1280 GN=rpsT PE=1 SV=1	2	805.898	0.055202	0.00013175	102.69	1
34	AARNDKGKVIMYADK	15	Oxidation (M),Deamidation (NQ),2 malon(K)	_AARN(de)DK(ma)GK(ma)VIM(ox)YADK_	A0A033UX71	UvrABC system protein B OS=Staphylococcus aureus C0673 OX=1413510 GN=uvrB PE=3 SV=1	2	934.938	-0.22136	0.0059042	46.318	1
35	AASSLTGDNATIPNHK	16	Unmodified	_AASSLTGDNATIPNHK_	W8TMY9	2-keto-4-pentenoate hydratase OS=Staphylococcus aureus OX=1280 GN=yisK PE=4 SV=1	3	532.937	1.1481	0.0041519	51.03	1
36	AASSLTGDNATIPNHK	16	Unmodified	_AASSLTGDNATIPNHK_	W8TMY9	2-keto-4-pentenoate hydratase OS=Staphylococcus aureus OX=1280 GN=yisK PE=4 SV=1	2	798.902	0.51358	3.7998e-05	98.676	1
37	AATIIFDK	8	Unmodified	_AATIIFDK_	A0A380DM07	Phosphomethylpyrimidine kinase OS=Staphylococcus aureus OX=1280 GN=pdxK PE=4 SV=1	2	439.753	-3.1528	0.023977	70.256	1
38	AAVDTLIVIPNDR	13	Unmodified	_AAVDTLIVIPNDR_	T1Y861	Cell division protein FtsZ OS=Staphylococcus aureus subsp. aureus CN1 OX=1193576 GN=ftsZ PE=3 SV=1	2	698.893	0.849	0.0015092	84.892	1
39	AAYFGEESK	9	Unmodified	_AAYFGEESK_	X5EIQ4	Dihydroxyacetone kinase OS=Staphylococcus aureus OX=1280 GN=dhaL PE=4 SV=1	2	501.232	-0.25437	0.0051939	83.456	1
40	AAYPINHIDNIVVPSK	16	Unmodified	_AAYPINHIDNIVVPSK_	A0A6B0BLJ6	Phosphoenolpyruvate carboxykinase (ATP) (Fragment) OS=Staphylococcus aureus OX=1280 GN=pckA PE=4 SV=1	3	584.321	-0.83084	0.0036145	52.599	1
41	AAYPINHIDNIVVPSK	16	Unmodified	_AAYPINHIDNIVVPSK_	A0A6B0BLJ6	Phosphoenolpyruvate carboxykinase (ATP) (Fragment) OS=Staphylococcus aureus OX=1280 GN=pckA PE=4 SV=1	2	875.978	-0.065918	0.012823	53.565	1
42	ADAQQNNFNK	10	Unmodified	_ADAQQNNFNK_	A1KE71	Immunoglobulin G binding protein A (Fragment) OS=Staphylococcus aureus OX=1280 GN=spa PE=4 SV=1	2	575.268	-1.4153	3.1743e-05	133.13	1
43	ADDIQNEIK	9	Unmodified	_ADDIQNEIK_	A0A6B5I265	ATP-dependent Clp protease ATP-binding subunit OS=Staphylococcus aureus OX=1280 GN=G0X69_04915 PE=4 SV=1	2	523.262	0.45966	0.0063712	80.688	1
44	ADDSAEFAALAFK	13	Unmodified	_ADDSAEFAALAFK_	W8UT26	Elongation factor G OS=Staphylococcus aureus OX=1280 GN=fusA PE=3 SV=1	2	678.328	-0.9694	7.4952e-05	102.87	1
45	ADDSAEFAALAFK	13	Unmodified	_ADDSAEFAALAFK_	W8UT26	Elongation factor G OS=Staphylococcus aureus OX=1280 GN=fusA PE=3 SV=1	2	678.328	-0.23639	0.000472	92.856	1
46	ADESKFDQFK	10	malon(K)	_ADESK(ma)FDQFK_	A0A6B5BMQ1	CsbD family protein OS=Staphylococcus aureus OX=1280 GN=G0W92_03945 PE=4 SV=1	2	650.788	1.6402	0.0043563	85.672	1
47	ADFNVPLKDGEITNDNR	17	malon(K)	_ADFNVPLK(ma)DGEITNDNR_	A0A6C1EUG3	Phosphoglycerate kinase OS=Staphylococcus aureus OX=1280 GN=GZ067_05860 PE=4 SV=1	2	1002.47	1.3593	0.00042613	84.107	1
48	ADFNVPLKDGEITNDNR	17	malon(K)	_ADFNVPLK(ma)DGEITNDNR_	A0A6C1EUG3	Phosphoglycerate kinase OS=Staphylococcus aureus OX=1280 GN=GZ067_05860 PE=4 SV=1	3	668.648	1.4228	0.0097424	45.992	1
49	ADGLVSGAAHSTGDTVRPALQIIK	24	Unmodified	_ADGLVSGAAHSTGDTVRPALQIIK_	W8USY9	Phosphate acetyltransferase OS=Staphylococcus aureus OX=1280 GN=eutD PE=4 SV=1	4	595.076	1.1312	0.018602	26.157	1
50	ADGQFVTGGSILYR	14	Unmodified	_ADGQFVTGGSILYR_	Q93EN9	Putative 50S ribosomal protein L27 (Fragment) OS=Staphylococcus aureus OX=1280 PE=4 SV=1	2	742.381	0.90108	0.0046201	68.972	1
51	ADGQFVTGGSILYR	14	Unmodified	_ADGQFVTGGSILYR_	Q93EN9	Putative 50S ribosomal protein L27 (Fragment) OS=Staphylococcus aureus OX=1280 PE=4 SV=1	3	495.256	1.9203	0.021804	31.58	1
52	ADIDGLHPGR	10	Unmodified	_ADIDGLHPGR_	A0A6B5T415	Phenylalanine--tRNA ligase subunit beta OS=Staphylococcus aureus OX=1280 GN=G0Z16_01135 PE=4 SV=1	2	525.77		0.0024677	70.399	1
53	ADIDYAHAEADTTYGK	16	Unmodified	_ADIDYAHAEADTTYGK_	T1YAQ4	30S ribosomal protein S3 OS=Staphylococcus aureus subsp. aureus CN1 OX=1193576 GN=rpsC PE=3 SV=1	3	580.929	1.5402	0.00021265	80.738	1
54	ADIDYAHAEADTTYGK	16	Unmodified	_ADIDYAHAEADTTYGK_	T1YAQ4	30S ribosomal protein S3 OS=Staphylococcus aureus subsp. aureus CN1 OX=1193576 GN=rpsC PE=3 SV=1	3	580.929	1.0168	0.019845	31.089	1
55	ADILKLDVDENPSTAAK	17	Unmodified	_ADILKLDVDENPSTAAK_	A0A2X2JXN0	Thioredoxin OS=Staphylococcus aureus OX=1280 GN=trxA_1 PE=4 SV=1	3	600.651	-1.2377	1.0825e-06	105.89	1
56	ADILKLDVDENPSTAAK	17	Unmodified	_ADILKLDVDENPSTAAK_	A0A2X2JXN0	Thioredoxin OS=Staphylococcus aureus OX=1280 GN=trxA_1 PE=4 SV=1	2	900.473	0.12375	9.4933e-08	116.13	1
57	ADITVVNDTGELYNVINQK	19	Unmodified	_ADITVVNDTGELYNVINQK_	A0A380EDH2	Transcriptional regulator OS=Staphylococcus aureus OX=1280 GN=NCTC10702_00728 PE=4 SV=1	3	702.695	-0.98107	2.8472e-05	79.514	1
58	ADITVVNDTGELYNVINQK	19	Unmodified	_ADITVVNDTGELYNVINQK_	A0A380EDH2	Transcriptional regulator OS=Staphylococcus aureus OX=1280 GN=NCTC10702_00728 PE=4 SV=1	2	1053.54	-1.7413	5.396e-14	125.96	1
59	ADKPTDFNSEK	11	Unmodified	_ADKPTDFNSEK_	A0A2X2K537	Peptidylprolyl isomerase OS=Staphylococcus aureus OX=1280 GN=prsA_2 PE=4 SV=1	3	417.867	0.23891	0.00035866	88.338	1
60	ADKPTDFNSEK	11	Unmodified	_ADKPTDFNSEK_	A0A2X2K537	Peptidylprolyl isomerase OS=Staphylococcus aureus OX=1280 GN=prsA_2 PE=4 SV=1	2	626.296	0.32927	0.0087163	80.871	1
61	ADNISNVK	8	Unmodified	_ADNISNVK_	A0A2X2K0V2	D-arabino-3-hexulose 6-phosphate formaldehyde lyase OS=Staphylococcus aureus OX=1280 GN=NCTC5664_00055 PE=4 SV=1	2	430.727	-0.21739	0.023977	70.256	1
62	ADNSFQYADNSIDTTDGK	18	Unmodified	_ADNSFQYADNSIDTTDGK_	A0A6B5TQF4	YSIRK-type signal peptide-containing protein OS=Staphylococcus aureus OX=1280 GN=G0W53_00820 PE=4 SV=1	2	981.422	-1.496	4.2711e-06	102.57	1
63	ADNVLQDR	8	Unmodified	_ADNVLQDR_	A0A6B0D0C8	Alkyl hydroperoxide reductase subunit F (Fragment) OS=Staphylococcus aureus OX=1280 GN=ahpF PE=4 SV=1	2	465.736		0.010204	78.264	1
64	ADQIAGIGITNQR	13	Unmodified	_ADQIAGIGITNQR_	Q8NWX7	Glycerol kinase OS=Staphylococcus aureus (strain MW2) OX=196620 GN=glpK PE=3 SV=1	2	678.865	-2.2373	0.0057235	67.136	1
65	ADVQDLNHGTVHSPSPVDVK	20	Unmodified	_ADVQDLNHGTVHSPSPVDVK_	T1YCW9	L-lactate dehydrogenase OS=Staphylococcus aureus subsp. aureus CN1 OX=1193576 GN=ldh PE=3 SV=1	3	705.687	-1.7474	0.00013099	68.639	1
66	ADVQDLNHGTVHSPSPVDVK	20	Unmodified	_ADVQDLNHGTVHSPSPVDVK_	T1YCW9	L-lactate dehydrogenase OS=Staphylococcus aureus subsp. aureus CN1 OX=1193576 GN=ldh PE=3 SV=1	4	529.517	-0.83234	0.029756	7.6353	1
67	ADVQDLNHGTVHSPSPVDVK	20	Unmodified	_ADVQDLNHGTVHSPSPVDVK_	T1YCW9	L-lactate dehydrogenase OS=Staphylococcus aureus subsp. aureus CN1 OX=1193576 GN=ldh PE=3 SV=1	3	705.687	-1.6932	5.75e-21	143.04	1
68	AEENITFSVEK	11	Unmodified	_AEENITFSVEK_	W8U3X2	50S ribosomal protein L6 OS=Staphylococcus aureus OX=1280 GN=rplF PE=1 SV=1	2	633.814	1.1863	0.0031627	78.324	1
69	AEGAHITPFIEK	12	Unmodified	_AEGAHITPFIEK_	T1YCG5	3-methyl-2-oxobutanoate hydroxymethyltransferase OS=Staphylococcus aureus subsp. aureus CN1 OX=1193576 GN=panB PE=3 SV=1	3	438.235	0.88634	0.011723	42.785	1
70	AEGLHGDITQAK	12	Unmodified	_AEGLHGDITQAK_	A0A6B5SE92	DEAD/DEAH box helicase OS=Staphylococcus aureus OX=1280 GN=G0Y75_11455 PE=4 SV=1	2	620.32	-0.55028	7.8949e-16	165.58	1
71	AEGNMNIFIIEYDDVNK	17	Unmodified	_AEGNMNIFIIEYDDVNK_	T1YD05	Arginine deiminase OS=Staphylococcus aureus subsp. aureus CN1 OX=1193576 GN=arcA PE=3 SV=1	3	662.316	1.7271	0.016165	32.858	1
72	AEGNMNIFIIEYDDVNK	17	Unmodified	_AEGNMNIFIIEYDDVNK_	T1YD05	Arginine deiminase OS=Staphylococcus aureus subsp. aureus CN1 OX=1193576 GN=arcA PE=3 SV=1	2	992.97	2.9201	0.00027428	83.404	1
73	AEIEGEMGDTHVGLQAR	17	Unmodified	_AEIEGEMGDTHVGLQAR_	Q2FZ09	Protein RecA OS=Staphylococcus aureus (strain NCTC 8325) OX=93061 GN=recA PE=3 SV=1	3	604.956	1.196	0.030791	20.439	1
74	AELLAPMSAIAGQR	14	Unmodified	_AELLAPMSAIAGQR_	Q6GGW9	Alanine dehydrogenase 1 OS=Staphylococcus aureus (strain MRSA252) OX=282458 GN=ald1 PE=3 SV=1	2	714.387	0.62118	0.0045145	69.258	1
75	AELPNLEEELK	11	Unmodified	_AELPNLEEELK_	W8UVY7	Peptide chain release factor 1 OS=Staphylococcus aureus OX=1280 GN=prfA PE=3 SV=1	2	642.838	0.17148	0.0023611	81.625	1
76	AELVQSFVER	10	Unmodified	_AELVQSFVER_	W8USY9	Phosphate acetyltransferase OS=Staphylococcus aureus OX=1280 GN=eutD PE=4 SV=1	2	589.314	1.6183	0.00039485	100.88	1
77	AEQYSEGTVPLHTLR	15	Unmodified	_AEQYSEGTVPLHTLR_	T1YAQ4	30S ribosomal protein S3 OS=Staphylococcus aureus subsp. aureus CN1 OX=1193576 GN=rpsC PE=3 SV=1	3	567.625	2.0128	0.015117	36.775	1
78	AEQYSEGTVPLHTLR	15	Unmodified	_AEQYSEGTVPLHTLR_	T1YAQ4	30S ribosomal protein S3 OS=Staphylococcus aureus subsp. aureus CN1 OX=1193576 GN=rpsC PE=3 SV=1	3	567.625	1.3511	0.00016418	89.911	1
79	AEQYSEGTVPLHTLR	15	Unmodified	_AEQYSEGTVPLHTLR_	T1YAQ4	30S ribosomal protein S3 OS=Staphylococcus aureus subsp. aureus CN1 OX=1193576 GN=rpsC PE=3 SV=1	2	850.934	1.3664	6.7634e-30	176.29	1
80	AEQYSEGTVPLHTLR	15	Unmodified	_AEQYSEGTVPLHTLR_	T1YAQ4	30S ribosomal protein S3 OS=Staphylococcus aureus subsp. aureus CN1 OX=1193576 GN=rpsC PE=3 SV=1	3	567.625	1.9077	0.0032778	54.281	1
81	AETVEALMETTLPNGK	16	Oxidation (M)	_AETVEALM(ox)ETTLPNGK_	A0A6B1RWP0	Elongation factor Ts OS=Staphylococcus aureus OX=1280 GN=GAY51_11945 PE=4 SV=1	2	860.427	-1.0717	0.0022649	64.52	1
82	AETVEALMETTLPNGK	16	Unmodified	_AETVEALMETTLPNGK_	A0A6B1RWP0	Elongation factor Ts OS=Staphylococcus aureus OX=1280 GN=GAY51_11945 PE=4 SV=1	2	852.43	-3.0835	7.2499e-31	176.4	1
83	AEVTSYDDYVQYGGESGAK	19	Unmodified	_AEVTSYDDYVQYGGESGAK_	T1Y603	Ribosome-binding ATPase YchF OS=Staphylococcus aureus subsp. aureus CN1 OX=1193576 GN=ychF PE=3 SV=1	2	1019.95	1.5105	2.7147e-27	153.36	1
84	AEVYVLSK	8	Unmodified	_AEVYVLSK_	W8TRT9	Elongation factor Tu OS=Staphylococcus aureus OX=1280 GN=tufA PE=3 SV=1	2	454.758	-0.24686	0.021102	73.573	1
85	AEVYVLSKDEGGR	13	malon(K)	_AEVYVLSK(ma)DEGGR_	W8TRT9	Elongation factor Tu OS=Staphylococcus aureus OX=1280 GN=tufA PE=3 SV=1	2	754.865	1.4235	0.010504	66.022	1
86	AEVYVLSKDEGGR	13	malon(K)	_AEVYVLSK(ma)DEGGR_	W8TRT9	Elongation factor Tu OS=Staphylococcus aureus OX=1280 GN=tufA PE=3 SV=1	2	754.865	2.1675	0.0080793	68.481	1
87	AFDKGTTTEEIAQSISPGLR	20	malon(K)	_AFDK(ma)GTTTEEIAQSISPGLR_	A0A077UHM5	Threonine--tRNA ligase OS=Staphylococcus aureus OX=1280 GN=thrS PE=3 SV=1	3	736.366	-1.2268	1.9407e-07	94.387	1
88	AFDMDVLYTGPNR	13	Oxidation (M)	_AFDM(ox)DVLYTGPNR_	A0A380ELB0	Glyoxylate reductase / Glyoxylate reductase / Hydroxypyruvate reductase OS=Staphylococcus aureus OX=1280 GN=NCTC10702_03618 PE=3 SV=1	2	757.851	4.0708	0.011934	49.298	1
89	AFDMDVLYTGPNR	13	Unmodified	_AFDMDVLYTGPNR_	A0A380ELB0	Glyoxylate reductase / Glyoxylate reductase / Hydroxypyruvate reductase OS=Staphylococcus aureus OX=1280 GN=NCTC10702_03618 PE=3 SV=1	2	749.853	0.46392	0.00088787	89.663	1
90	AFGLIDEDQIVGK	13	Unmodified	_AFGLIDEDQIVGK_	A0A6B5IUF8	Signal peptidase I (Fragment) OS=Staphylococcus aureus OX=1280 GN=lepB PE=4 SV=1	2	702.872	3.0323	0.0074709	64.224	1
91	AFIETYQQQHPEDEVK	16	Unmodified	_AFIETYQQQHPEDEVK_	A0A6B1RS86	FMN-dependent NADH-azoreductase OS=Staphylococcus aureus OX=1280 GN=GAY51_02555 PE=4 SV=1	3	654.646	0.11658	2.487e-08	112.34	1
92	AFNVEGLDAR	10	Unmodified	_AFNVEGLDAR_	A0A5C8XBB5	DUF1054 family protein (Fragment) OS=Staphylococcus aureus OX=1280 GN=FVP29_03010 PE=4 SV=1	2	546.278	1.4307	0.0027205	85.355	1
93	AFVIDKDESGK	11	Unmodified	_AFVIDKDESGK_	A0A6B0BK82	Acryloyl-CoA reductase (Fragment) OS=Staphylococcus aureus OX=1280 GN=GO793_04015 PE=4 SV=1	3	403.543	0.224	0.014208	43.604	1
94	AFVIDKDESGKVTPTFK	17	malon(K)	_AFVIDKDESGK(ma)VTPTFK_	A0A6B0BK82	Acryloyl-CoA reductase (Fragment) OS=Staphylococcus aureus OX=1280 GN=GO793_04015 PE=4 SV=1	3	656.67	1.2012	0.006816	46.415	1
95	AGAHIIPNNKK	11	malon(K)	_AGAHIIPNNK(ma)K_	A0A380DYD9	Zn-dependent hydrolase OS=Staphylococcus aureus OX=1280 GN=NCTC5664_02203 PE=4 SV=1	2	624.838	0.18178	0.00096559	88.338	1
96	AGAIVVAVGLPVDK	14	Unmodified	_AGAIVVAVGLPVDK_	A0A6B1RIE9	Alcohol dehydrogenase AdhP OS=Staphylococcus aureus OX=1280 GN=adhP PE=4 SV=1	2	654.898	1.5746	0.0043099	69.92	1
97	AGAIVVAVGLPVDK	14	Unmodified	_AGAIVVAVGLPVDK_	A0A6B1RIE9	Alcohol dehydrogenase AdhP OS=Staphylococcus aureus OX=1280 GN=adhP PE=4 SV=1	2	654.898	1.5224	0.0067629	63.185	1
98	AGEKVEPAMIENR	13	Oxidation (M),malon(K)	_AGEK(ma)VEPAM(ox)IENR_	A0A380EKQ6	Elongation factor P OS=Staphylococcus aureus OX=1280 GN=efp PE=3 SV=1	2	773.364	3.1125	0.012826	59.15	1
99	AGEPFAPGANPMHGR	15	Unmodified	_AGEPFAPGANPMHGR_	W8TSM8	Formate C-acetyltransferase OS=Staphylococcus aureus OX=1280 GN=pflB PE=4 SV=1	3	503.574	0.37097	0.02908	22.911	1
100	AGEPFAPGANPMHGR	15	Unmodified	_AGEPFAPGANPMHGR_	W8TSM8	Formate C-acetyltransferase OS=Staphylococcus aureus OX=1280 GN=pflB PE=4 SV=1	3	503.574	1.1803	0.012418	39.364	1
101	AGEPFAPGANPMHGR	15	Unmodified	_AGEPFAPGANPMHGR_	W8TSM8	Formate C-acetyltransferase OS=Staphylococcus aureus OX=1280 GN=pflB PE=4 SV=1	2	754.857	0.027461	0.0044688	67.234	1
102	AGEPFAPGANPMHGR	15	Oxidation (M)	_AGEPFAPGANPM(ox)HGR_	W8TSM8	Formate C-acetyltransferase OS=Staphylococcus aureus OX=1280 GN=pflB PE=4 SV=1	2	762.854	-1.4131	0.01016	48.214	1
103	AGEYEDCKDADLVVITAGAPQKPGETR	27	Unmodified	_AGEYEDCKDADLVVITAGAPQKPGETR_	T1YCW9	L-lactate dehydrogenase OS=Staphylococcus aureus subsp. aureus CN1 OX=1193576 GN=ldh PE=3 SV=1	4	723.353	1.9845	0.0022549	34.408	1
104	AGEYSDCHDADLVVICAGAAQKPGETR	27	Unmodified	_AGEYSDCHDADLVVICAGAAQKPGETR_	T1Y5L6	L-lactate dehydrogenase OS=Staphylococcus aureus subsp. aureus CN1 OX=1193576 GN=ldh PE=3 SV=1	3	964.108	1.2842	1.1009e-15	99.6	1
105	AGFDDGNRPIGSFLFVGPTGVGK	23	Unmodified	_AGFDDGNRPIGSFLFVGPTGVGK_	A0A6B5I265	ATP-dependent Clp protease ATP-binding subunit OS=Staphylococcus aureus OX=1280 GN=G0X69_04915 PE=4 SV=1	3	770.062	2.4461	1.4674e-15	119.41	1
106	AGIDINR	7	Unmodified	_AGIDINR_	A0A380ELA9	50S ribosomal protein L20 OS=Staphylococcus aureus OX=1280 GN=rplT PE=3 SV=1	2	379.711		1.062e-30	151.17	1
107	AGINSVQELADK	12	Unmodified	_AGINSVQELADK_	W8TRE8	DNA-directed RNA polymerase subunit alpha OS=Staphylococcus aureus OX=1280 GN=rpoA PE=3 SV=1	2	622.828	1.3782	0.0037677	71.176	1
108	AGINSVQELADK	12	Unmodified	_AGINSVQELADK_	W8TRE8	DNA-directed RNA polymerase subunit alpha OS=Staphylococcus aureus OX=1280 GN=rpoA PE=3 SV=1	2	622.828	0.31011	0.00073624	89.301	1
109	AGLAEISIPENEPGSSIMPGK	21	Unmodified	_AGLAEISIPENEPGSSIMPGK_	T1YA47	Fumarate hydratase class II OS=Staphylococcus aureus subsp. aureus CN1 OX=1193576 GN=fumC PE=3 SV=1	3	699.689	1.6631	0.031064	16.717	1
110	AGLGMTDGILSLVPAAR	17	Oxidation (M)	_AGLGM(ox)TDGILSLVPAAR_	W8U942	Uracil phosphoribosyltransferase OS=Staphylococcus aureus OX=1280 GN=upp PE=3 SV=1	2	829.451	-0.068478	0.00082337	70.038	1
111	AGQFYINQR	9	Unmodified	_AGQFYINQR_	A0A2X2M020	30S ribosomal protein S2 OS=Staphylococcus aureus OX=1280 GN=rpsB PE=1 SV=1	2	548.78	1.2859	0.0024177	93.429	1
112	AGTGCYVSISGDK	13	Unmodified	_AGTGCYVSISGDK_	A0A6B1RUX1	Beta-propeller fold lactonase family protein OS=Staphylococcus aureus OX=1280 GN=GAY51_10050 PE=4 SV=1	2	657.803	-0.013924	0.02255	51.092	1
113	AGTNGVHGAPLGEDER	16	Deamidation (NQ)	_AGTN(de)GVHGAPLGEDER_	T1Y9N5	Transketolase OS=Staphylococcus aureus subsp. aureus CN1 OX=1193576 GN=SAKOR_01278 PE=3 SV=1	3	527.581	-0.15513	0.002506	60.489	1
114	AGVITESEVQEIIDHFIMK	19	Oxidation (M)	_AGVITESEVQEIIDHFIM(ox)K_	W8TSM8	Formate C-acetyltransferase OS=Staphylococcus aureus OX=1280 GN=pflB PE=4 SV=1	3	725.705	1.9874	7.8802e-05	77.795	1
115	AGVTDYK	7	Unmodified	_AGVTDYK_	A0A380ELR3	Transaldolase OS=Staphylococcus aureus OX=1280 GN=tal PE=4 SV=1	2	377.193	1.2268	0.032045	77.741	1
116	AGYTVNNTPK	10	Deamidation (NQ)	_AGYTVN(de)NTPK_	A0A133PYK9	CHAP domain protein OS=Staphylococcus aureus OX=1280 GN=ssaA2_1 PE=4 SV=1	2	533.264	0.74518	0.0099761	94.692	1
117	AGYTVNNTPK	10	Unmodified	_AGYTVNNTPK_	A0A133PYK9	CHAP domain protein OS=Staphylococcus aureus OX=1280 GN=ssaA2_1 PE=4 SV=1	2	532.772	0.73198	0.0044864	79.07	1
118	AHLQMLEER	9	Unmodified	_AHLQMLEER_	W8TVM8	Threonine--tRNA ligase OS=Staphylococcus aureus OX=1280 GN=thrS PE=3 SV=1	2	563.787	0.31156	0.00011079	136.57	1
119	AHNIINDINDIDGTGHR	17	Unmodified	_AHNIINDINDIDGTGHR_	T1Y9R0	Acetate kinase OS=Staphylococcus aureus subsp. aureus CN1 OX=1193576 GN=ackA PE=3 SV=1	4	469.483	0.87545	0.00035906	71.354	1
120	AHNIINDINDIDGTGHR	17	Unmodified	_AHNIINDINDIDGTGHR_	T1Y9R0	Acetate kinase OS=Staphylococcus aureus subsp. aureus CN1 OX=1193576 GN=ackA PE=3 SV=1	3	625.642	0.94616	1.7884e-26	154.88	1
121	AHPELLNMFNQTNQK	15	Oxidation (M)	_AHPELLNM(ox)FNQTNQK_	A0A6B1RF37	Nitric oxide dioxygenase OS=Staphylococcus aureus OX=1280 GN=GAY51_02405 PE=4 SV=1	3	600.961	1.8843	0.0019239	67.838	1
122	AHPELLNMFNQTNQK	15	Unmodified	_AHPELLNMFNQTNQK_	A0A6B1RF37	Nitric oxide dioxygenase OS=Staphylococcus aureus OX=1280 GN=GAY51_02405 PE=4 SV=1	3	595.63	2.0181	7.8475e-06	104.55	1
123	AHPELLNMFNQTNQK	15	Unmodified	_AHPELLNMFNQTNQK_	A0A6B1RF37	Nitric oxide dioxygenase OS=Staphylococcus aureus OX=1280 GN=GAY51_02405 PE=4 SV=1	2	892.941	1.7055	0.0090551	44.853	1
124	AHPELLNMFNQTNQKR	16	malon(K)	_AHPELLNMFNQTNQK(ma)R_	A0A6B1RF37	Nitric oxide dioxygenase OS=Staphylococcus aureus OX=1280 GN=GAY51_02405 PE=4 SV=1	3	676.33	1.6684	8.2065e-05	87.676	1
125	AHVIYPTVPENLINEQTK	18	Unmodified	_AHVIYPTVPENLINEQTK_	A0A380ELS4	S-adenosylmethionine synthase OS=Staphylococcus aureus OX=1280 GN=metK_1 PE=3 SV=1	3	689.369	-2.4069	2.3621e-06	96.773	1
126	AHWDLVEELK	10	Unmodified	_AHWDLVEELK_	A0A1Q8DFK8	Serine--tRNA ligase OS=Staphylococcus aureus OX=1280 GN=serS PE=3 SV=1	2	620.322	1.5299	0.00015588	107.06	1
127	AHWDLVEELK	10	Unmodified	_AHWDLVEELK_	A0A1Q8DFK8	Serine--tRNA ligase OS=Staphylococcus aureus OX=1280 GN=serS PE=3 SV=1	3	413.884	1.5774	0.0078591	53.751	1
128	AIAKAMVNSK	10	malon(K)	_AIAK(ma)AMVNSK_	T1Y7U3	Dihydrolipoamide acetyltransferase component of pyruvate dehydrogenase complex OS=Staphylococcus aureus subsp. aureus CN1 OX=1193576 GN=SAKOR_01017 PE=3 SV=1	2	559.797	0.69136	0.0089896	76.165	1
129	AIAVGIPGIQVDGMDALAVYQATK	24	Unmodified	_AIAVGIPGIQVDGMDALAVYQATK_	A0A0U1MY72	Pyruvate dehydrogenase E1 component subunit alpha OS=Staphylococcus aureus OX=1280 GN=pdhA PE=4 SV=1	3	801.098	0.80762	0.00045965	46.065	1
130	AIDALVPIGR	10	Unmodified	_AIDALVPIGR_	A0A6D2GXJ7	ATP synthase F0F1 subunit alpha OS=Staphylococcus aureus OX=1280 GN=atpA PE=4 SV=1	2	512.811	1.9804	0.018785	59.908	1
131	AIDVLDITAAHLSAQSPAIDK	21	Unmodified	_AIDVLDITAAHLSAQSPAIDK_	A0A6B5I265	ATP-dependent Clp protease ATP-binding subunit OS=Staphylococcus aureus OX=1280 GN=G0X69_04915 PE=4 SV=1	3	717.055	0.41623	5.7543e-09	101.48	1
132	AIEEEFGVTAAAPVAVAGAAGGADAAAEK	29	Unmodified	_AIEEEFGVTAAAPVAVAGAAGGADAAAEK_	T1Y5Y2	50S ribosomal protein L7/L12 OS=Staphylococcus aureus subsp. aureus CN1 OX=1193576 GN=rplL PE=3 SV=1	3	872.105	-0.30232	1.3364e-35	135.34	1
133	AIENENDTYLTK	12	Unmodified	_AIENENDTYLTK_	A0A2X2K146	Holliday junction ATP-dependent DNA helicase RuvA OS=Staphylococcus aureus OX=1280 GN=ruvA_2 PE=3 SV=1	2	705.841	0.44123	7.709e-06	107.09	1
134	AIGDQLTCIFVDHGLLR	17	Unmodified	_AIGDQLTCIFVDHGLLR_	A0A380DLM1	GMP synthase [glutamine-hydrolyzing] OS=Staphylococcus aureus OX=1280 GN=guaA PE=3 SV=1	3	643.34	1.693	0.00016813	79.346	1
135	AIGKVIPEIDGK	12	malon(K)	_AIGK(ma)VIPEIDGK_	T1Y6M8	Glyceraldehyde-3-phosphate dehydrogenase OS=Staphylococcus aureus subsp. aureus CN1 OX=1193576 GN=SAKOR_00776 PE=3 SV=1	2	663.369	2.0145	0.026108	56.527	1
136	AIGNALELQEAIDTLK	16	Unmodified	_AIGNALELQEAIDTLK_	A0A380DXY3	Pyrimidine-nucleoside phosphorylase OS=Staphylococcus aureus OX=1280 GN=pdp PE=3 SV=1	2	849.967	1.4053	2.1341e-17	132.84	1
137	AIGNALELQEAIDTLK	16	Unmodified	_AIGNALELQEAIDTLK_	A0A380DXY3	Pyrimidine-nucleoside phosphorylase OS=Staphylococcus aureus OX=1280 GN=pdp PE=3 SV=1	3	566.981	0.56415	1.8469e-05	94.487	1
138	AIGNALELQEAIDTLK	16	Unmodified	_AIGNALELQEAIDTLK_	A0A380DXY3	Pyrimidine-nucleoside phosphorylase OS=Staphylococcus aureus OX=1280 GN=pdp PE=3 SV=1	2	849.967	-0.84788	1.1572e-07	110.84	1
139	AIGVCNFNVHHLEK	14	Unmodified	_AIGVCNFNVHHLEK_	A0A5C8X8E8	Aldo/keto reductase (Fragment) OS=Staphylococcus aureus OX=1280 GN=FVP29_09260 PE=4 SV=1	3	546.612	0.71705	0.0020153	60.196	1
140	AIGVVGGYVAGTK	13	Unmodified	_AIGVVGGYVAGTK_	A0A6B5DIH9	Glycine C-acetyltransferase OS=Staphylococcus aureus OX=1280 GN=G0Y59_09165 PE=4 SV=1	2	596.34	2.6797	0.015724	54.898	1
141	AIGYPIHTM	9	Unmodified	_AIGYPIHTM_	W8URN4	Dihydrolipoyl dehydrogenase OS=Staphylococcus aureus OX=1280 GN=lpdA PE=3 SV=1	2	501.757	2.0067	0.014284	67.981	1
142	AIGYPIHTM	9	Oxidation (M)	_AIGYPIHTM(ox)_	W8URN4	Dihydrolipoyl dehydrogenase OS=Staphylococcus aureus OX=1280 GN=lpdA PE=3 SV=1	2	509.755	-0.17248	0.019728	42.599	1
143	AIIAANLGVNPTSDGEVIR	19	Unmodified	_AIIAANLGVNPTSDGEVIR_	A0A5C8X9A9	Ribosome recycling factor (Fragment) OS=Staphylococcus aureus OX=1280 GN=FVP29_06260 PE=3 SV=1	2	955.521	1.116	3.2495e-99	234.57	1
144	AIKEETELGK	10	malon(K)	_AIK(ma)EETELGK_	W8TRE5	Adenylate kinase OS=Staphylococcus aureus OX=1280 GN=adk PE=3 SV=1	2	602.309	0.77932	0.0052678	83.137	1
145	AIKEETELGK	10	Unmodified	_AIKEETELGK_	W8TRE5	Adenylate kinase OS=Staphylococcus aureus OX=1280 GN=adk PE=3 SV=1	2	559.309		0.020079	43.297	1
146	AILEGQTNPPTLNSEIK	17	Unmodified	_AILEGQTNPPTLNSEIK_	A0A380E1D6	Uncharacterized protein OS=Staphylococcus aureus OX=1280 GN=NCTC5664_02481 PE=4 SV=1	2	912.989	1.4441	1.2394e-05	102.08	1
147	AILSLEAPIGR	11	Unmodified	_AILSLEAPIGR_	W8TZY6	2-oxoisovalerate dehydrogenase OS=Staphylococcus aureus OX=1280 GN=pdhB PE=4 SV=1	2	570.343	1.935	0.00022267	96.171	1
148	AINEIRPGMTGAEADAISR	19	Unmodified	_AINEIRPGMTGAEADAISR_	A0A6B5HWV6	Aminopeptidase P family protein OS=Staphylococcus aureus OX=1280 GN=G0X69_01445 PE=4 SV=1	3	658.002	1.7398	1.6796e-06	87.352	1
149	AIQDVTGLEENDPVIQAWAK	20	Unmodified	_AIQDVTGLEENDPVIQAWAK_	A0A6B1RF37	Nitric oxide dioxygenase OS=Staphylococcus aureus OX=1280 GN=GAY51_02405 PE=4 SV=1	3	733.043	-1.1864	1.1473e-06	85.087	1
150	AISGQGSTLIEAVTSR	16	Unmodified	_AISGQGSTLIEAVTSR_	T1YAU4	2-oxoisovalerate dehydrogenase alpha subunit OS=Staphylococcus aureus subsp. aureus CN1 OX=1193576 GN=SAKOR_01464 PE=4 SV=1	2	795.428	0.46243	0.0061952	61.477	1
151	AISTEEAEITLINK	14	Unmodified	_AISTEEAEITLINK_	A0A2X2JYX5	NADH dehydrogenase OS=Staphylococcus aureus OX=1280 GN=NCTC7878_00625 PE=4 SV=1	2	766.414	1.1349	0.0022687	82.651	1
152	AITHKEIGQR	10	malon(K)	_AITHK(ma)EIGQR_	A0A380DVG0	Translation initiation factor IF-3 OS=Staphylococcus aureus OX=1280 GN=infC PE=3 SV=1	3	413.554	0.15163	0.00014959	103.44	1
153	AITHKEIGQR	10	malon(K)	_AITHK(ma)EIGQR_	A0A380DVG0	Translation initiation factor IF-3 OS=Staphylococcus aureus OX=1280 GN=infC PE=3 SV=1	2	619.828	0.74926	0.012371	70.089	1
154	AITPQDKR	8	malon(K)	_AITPQDK(ma)R_	A0A5C8XBB5	DUF1054 family protein (Fragment) OS=Staphylococcus aureus OX=1280 GN=FVP29_03010 PE=4 SV=1	2	507.764		0.019383	60.398	1
155	AIVAATESGSTAR	13	Unmodified	_AIVAATESGSTAR_	W8UX29	Pyruvate kinase OS=Staphylococcus aureus OX=1280 GN=pyk PE=3 SV=1	2	617.325	0.077378	1.3411e-07	117.2	1
156	AIVAATESGSTAR	13	Unmodified	_AIVAATESGSTAR_	W8UX29	Pyruvate kinase OS=Staphylococcus aureus OX=1280 GN=pyk PE=3 SV=1	2	617.325	1.7009	0.0058119	66.989	1
157	AIVIGGGLLGLECAR	15	Unmodified	_AIVIGGGLLGLECAR_	A0A6B5EK94	NAD(P)/FAD-dependent oxidoreductase OS=Staphylococcus aureus OX=1280 GN=G0Y82_06660 PE=4 SV=1	2	749.924	-0.70781	0.017695	51.03	1
158	AIVKVTDADFDSK	13	Unmodified	_AIVKVTDADFDSK_	Q6GHU0	Thioredoxin OS=Staphylococcus aureus (strain MRSA252) OX=282458 GN=trxA PE=3 SV=1	3	470.249	1.3959	0.004463	54.898	1
159	AIVQATTHYQDYELIGR	17	Unmodified	_AIVQATTHYQDYELIGR_	T1Y826	Pyridoxal 5'-phosphate synthase subunit PdxS OS=Staphylococcus aureus subsp. aureus CN1 OX=1193576 GN=pdxS PE=3 SV=1	3	660.006	-0.30874	1.9538e-06	104.2	1
160	AKAKQLPQITVK	12	Deamidation (NQ),2 malon(K)	_AK(ma)AK(ma)Q(de)LPQITVK_	A0A2X2K2B2	5-amino-6-(5-phosphoribosylamino)uracil reductase OS=Staphylococcus aureus OX=1280 GN=ribD_1 PE=4 SV=1	2	749.412	-1.0786	0.021903	46.069	1
161	AKEFVENAK	9	malon(K)	_AK(ma)EFVENAK_	A0A6B0AR42	CsbD family protein OS=Staphylococcus aureus OX=1280 GN=GO661_09025 PE=4 SV=1	2	561.277	-0.35205	0.0042303	92.866	1
162	AKLQITLTR	9	malon(K)	_AK(ma)LQITLTR_	W8UVN7	50S ribosomal protein L30 OS=Staphylococcus aureus OX=1280 GN=rpmD PE=1 SV=1	2	565.332	-1.6357	0.02144	56.087	1
163	AKPGEISWDSPFGEGR	16	Unmodified	_AKPGEISWDSPFGEGR_	A0A6B0CVC1	Cysteine--tRNA ligase (Fragment) OS=Staphylococcus aureus OX=1280 GN=GO941_11870 PE=4 SV=1	3	578.281	-2.6603	0.002405	56.817	1
164	AKPSTLTDGYYETSIHSFTK	20	malon(K)	_AK(ma)PSTLTDGYYETSIHSFTK_	A0A6B1RND6	Xanthine phosphoribosyltransferase OS=Staphylococcus aureus OX=1280 GN=xpt PE=4 SV=1	3	778.038	2.0082	4.8596e-08	99.092	1
165	AKPSTLTDGYYETSIHSFTKNK	22	malon(K)	_AKPSTLTDGYYETSIHSFTK(ma)NK_	A0A6B1RND6	Xanthine phosphoribosyltransferase OS=Staphylococcus aureus OX=1280 GN=xpt PE=4 SV=1	3	858.75	0.89543	4.0254e-05	68.386	1
166	AKPSTLTDGYYETSIHSFTKNK	22	malon(K)	_AKPSTLTDGYYETSIHSFTK(ma)NK_	A0A6B1RND6	Xanthine phosphoribosyltransferase OS=Staphylococcus aureus OX=1280 GN=xpt PE=4 SV=1	4	644.314	2.3832	0.0012303	44.6	1
167	ALDDDEIIELVDK	13	Unmodified	_ALDDDEIIELVDK_	X5EIR3	Peptide methionine sulfoxide reductase MsrB OS=Staphylococcus aureus OX=1280 GN=msrB PE=3 SV=1	2	744.377	-0.37113	0.0026833	77.776	1
168	ALDIDIVPPAQADGK	15	Unmodified	_ALDIDIVPPAQADGK_	A0A6B5KXY6	Organic hydroperoxide resistance protein (Fragment) OS=Staphylococcus aureus OX=1280 GN=G0X68_13670 PE=4 SV=1	2	761.909	-0.5934	0.0088983	56.872	1
169	ALDMGAVECHIIDATK	16	Unmodified	_ALDMGAVECHIIDATK_	Q8NXF2	Argininosuccinate synthase OS=Staphylococcus aureus (strain MW2) OX=196620 GN=argG PE=3 SV=1	3	581.952	-1.4125	8.2017e-05	88.385	1
170	ALDQAFKK	8	malon(K)	_ALDQAFK(ma)K_	T1YA45	Trigger factor OS=Staphylococcus aureus subsp. aureus CN1 OX=1193576 GN=tig PE=3 SV=1	2	503.764		0.017191	45.368	1
171	ALDTTHYILTESK	13	Unmodified	_ALDTTHYILTESK_	A0A133QCU1	2,3-bisphosphoglycerate-dependent phosphoglycerate mutase (Fragment) OS=Staphylococcus aureus OX=1280 GN=HMPREF3211_00061 PE=3 SV=1	3	497.928	1.8171	0.0095875	43.761	1
172	ALDTTHYILTESK	13	Unmodified	_ALDTTHYILTESK_	A0A133QCU1	2,3-bisphosphoglycerate-dependent phosphoglycerate mutase (Fragment) OS=Staphylococcus aureus OX=1280 GN=HMPREF3211_00061 PE=3 SV=1	2	746.388	2.1946	1.3197e-11	136.3	1
173	ALEEIAEGKIR	11	malon(K)	_ALEEIAEGK(ma)IR_	A0A0U1MKT5	DNA-directed RNA polymerase subunit omega OS=Staphylococcus aureus OX=1280 GN=rpoZ PE=3 SV=1	2	657.849	-2.5808	0.0046645	79.659	1
174	ALEGDAQYEEK	11	Unmodified	_ALEGDAQYEEK_	W8TRT9	Elongation factor Tu OS=Staphylococcus aureus OX=1280 GN=tufA PE=3 SV=1	2	626.788	0.078191	0.0037709	75.819	1
175	ALEILGLDK	9	Unmodified	_ALEILGLDK_	A0A380DPY9	Haloacid dehalogenase-like hydrolase OS=Staphylococcus aureus OX=1280 GN=nagD_3 PE=4 SV=1	2	486.292	-1.1538	0.021062	62.463	1
176	ALEPMGEEYLNVVK	14	Oxidation (M)	_ALEPM(ox)GEEYLNVVK_	Q2G1U3	Oligoendopeptidase F OS=Staphylococcus aureus (strain NCTC 8325) OX=93061 GN=SAOUHSC_00937 PE=3 SV=1	2	804.403	2.7691	0.0096648	50.088	1
177	ALEPMGEEYLNVVK	14	Unmodified	_ALEPMGEEYLNVVK_	Q2G1U3	Oligoendopeptidase F OS=Staphylococcus aureus (strain NCTC 8325) OX=93061 GN=SAOUHSC_00937 PE=3 SV=1	2	796.405	-0.19097	2.0439e-05	106.32	1
178	ALEPSIVGQEHYEVAR	16	Unmodified	_ALEPSIVGQEHYEVAR_	W8UW00	ATP synthase subunit beta OS=Staphylococcus aureus OX=1280 GN=atpD PE=3 SV=1	3	599.976	1.509	0.00035762	77.324	1
179	ALEQNLKPVVVVNK	14	Unmodified	_ALEQNLKPVVVVNK_	A0A6B0B4S1	Translational GTPase TypA (Fragment) OS=Staphylococcus aureus OX=1280 GN=typA PE=4 SV=1	3	517.647	-2.434	0.0043151	53.448	1
180	ALFATLSNQELVDK	14	Unmodified	_ALFATLSNQELVDK_	T1YD05	Arginine deiminase OS=Staphylococcus aureus subsp. aureus CN1 OX=1193576 GN=arcA PE=3 SV=1	2	774.917	-1.6641	8.8996e-20	153.81	1
181	ALFATLSNQELVDK	14	Unmodified	_ALFATLSNQELVDK_	T1YD05	Arginine deiminase OS=Staphylococcus aureus subsp. aureus CN1 OX=1193576 GN=arcA PE=3 SV=1	2	774.917	-1.3959	1.3285e-29	176.25	1
182	ALGDAVESIYDASVNK	16	Unmodified	_ALGDAVESIYDASVNK_	Q6GDJ7	Fructose-bisphosphate aldolase class 1 OS=Staphylococcus aureus (strain MRSA252) OX=282458 GN=fda PE=3 SV=3	3	551.277	2.9302	0.0025053	41.088	1
183	ALGDAVESIYDASVNKN	17	Unmodified	_ALGDAVESIYDASVNKN_	Q6GDJ7	Fructose-bisphosphate aldolase class 1 OS=Staphylococcus aureus (strain MRSA252) OX=282458 GN=fda PE=3 SV=3	2	883.434	-1.4108	0.00012799	90.561	1
184	ALGDYEYEEIETR	13	Unmodified	_ALGDYEYEEIETR_	A0A5C8XAM8	Probable DNA-directed RNA polymerase subunit delta (Fragment) OS=Staphylococcus aureus OX=1280 GN=FVP29_04565 PE=3 SV=1	2	794.362	-0.33606	0.004133	69.92	1
185	ALGIFTVSDHLLR	13	Unmodified	_ALGIFTVSDHLLR_	A0A033UPV9	Purine nucleoside phosphorylase DeoD-type OS=Staphylococcus aureus C0673 OX=1413510 GN=deoD PE=3 SV=1	3	481.277	2.1645	0.0023918	61.11	1
186	ALGLITEENGITSPSAIVGLEK	22	Unmodified	_ALGLITEENGITSPSAIVGLEK_	W8UX29	Pyruvate kinase OS=Staphylococcus aureus OX=1280 GN=pyk PE=3 SV=1	2	1106.61	1.258	5.5508e-64	195.56	1
187	ALGLITEENGITSPSAIVGLEK	22	Unmodified	_ALGLITEENGITSPSAIVGLEK_	W8UX29	Pyruvate kinase OS=Staphylococcus aureus OX=1280 GN=pyk PE=3 SV=1	3	738.074	0.047536	1.9543e-06	77.959	1
188	ALGLITEENGITSPSAIVGLEK	22	Deamidation (NQ)	_ALGLITEEN(de)GITSPSAIVGLEK_	W8UX29	Pyruvate kinase OS=Staphylococcus aureus OX=1280 GN=pyk PE=3 SV=1	3	738.402	-0.75506	1.8553e-11	97.49	1
189	ALGLITEENGITSPSAIVGLEK	22	Deamidation (NQ)	_ALGLITEEN(de)GITSPSAIVGLEK_	W8UX29	Pyruvate kinase OS=Staphylococcus aureus OX=1280 GN=pyk PE=3 SV=1	2	1107.1	-0.82931	1.0156e-38	166.27	1
190	ALIFNETELEEAYK	14	Unmodified	_ALIFNETELEEAYK_	W8U862	Molecular chaperone GroEL OS=Staphylococcus aureus OX=1280 GN=BTN44_14810 PE=4 SV=1	2	835.42	0.021138	8.2956e-05	102.52	1
191	ALKPGEALVQTEYCGVCHTDLHVK	24	Unmodified	_ALKPGEALVQTEYCGVCHTDLHVK_	A0A6B1RIE9	Alcohol dehydrogenase AdhP OS=Staphylococcus aureus OX=1280 GN=adhP PE=4 SV=1	4	682.091	2.1283	1.0988e-14	107.56	1
192	ALLEADPEYR	10	Unmodified	_ALLEADPEYR_	A0A2S6DJ73	30S ribosomal protein S9 (Fragment) OS=Staphylococcus aureus OX=1280 GN=CSC87_14700 PE=3 SV=1	2	588.798	1.0231	0.0049631	77.662	1
193	ALQQQGLTADK	11	Unmodified	_ALQQQGLTADK_	A0A2X2K537	Peptidylprolyl isomerase OS=Staphylococcus aureus OX=1280 GN=prsA_2 PE=4 SV=1	2	586.817	-0.10551	1.4646e-07	137.89	1
194	ALQSAGLEVTAIR	13	Unmodified	_ALQSAGLEVTAIR_	T1YB95	30S ribosomal protein S11 OS=Staphylococcus aureus subsp. aureus CN1 OX=1193576 GN=rpsK PE=3 SV=1	2	664.88	2.7104	0.00094418	89.231	1
195	ALQSAGLEVTAIR	13	Unmodified	_ALQSAGLEVTAIR_	T1YB95	30S ribosomal protein S11 OS=Staphylococcus aureus subsp. aureus CN1 OX=1193576 GN=rpsK PE=3 SV=1	2	664.88	-0.70277	0.0069797	65.043	1
196	ALSLDDTNGFVK	12	Unmodified	_ALSLDDTNGFVK_	W8URN4	Dihydrolipoyl dehydrogenase OS=Staphylococcus aureus OX=1280 GN=lpdA PE=3 SV=1	2	640.33	0.28433	0.0040458	69.864	1
197	ALSLDDTNGFVK	12	Deamidation (NQ)	_ALSLDDTN(de)GFVK_	W8URN4	Dihydrolipoyl dehydrogenase OS=Staphylococcus aureus OX=1280 GN=lpdA PE=3 SV=1	2	640.822		3.8832e-05	71.176	1
198	ALSTNDDIETACR	13	Unmodified	_ALSTNDDIETACR_	A0A380EHV2	3-oxoacyl-[acyl-carrier-protein] synthase, KASII OS=Staphylococcus aureus OX=1280 GN=fabF PE=3 SV=1	2	733.333	-3.1728	2.0818e-07	115.57	1
199	ALSTNDDIETACRPFQEGR	19	Unmodified	_ALSTNDDIETACRPFQEGR_	A0A380EHV2	3-oxoacyl-[acyl-carrier-protein] synthase, KASII OS=Staphylococcus aureus OX=1280 GN=fabF PE=3 SV=1	3	727.339	-0.5852	2.4429e-06	83.758	1
200	ALVDSGAVTDAYIQAMK	17	Unmodified	_ALVDSGAVTDAYIQAMK_	A0A5C8X881	PTS sugar transporter subunit IIA (Fragment) OS=Staphylococcus aureus OX=1280 GN=FVP29_08165 PE=4 SV=1	2	876.945	1.0047	7.9565e-08	108.63	1
201	ALVPSGASTGEHEAVELR	18	Unmodified	_ALVPSGASTGEHEAVELR_	W8USI1	Enolase OS=Staphylococcus aureus OX=1280 GN=eno PE=3 SV=1	3	608.315	-0.99485	0.0010932	60.764	1
202	ALVPSGASTGEHEAVELR	18	Unmodified	_ALVPSGASTGEHEAVELR_	W8USI1	Enolase OS=Staphylococcus aureus OX=1280 GN=eno PE=3 SV=1	3	608.315	-0.087015	1.4129e-07	106.93	1
203	ALVPSGASTGEHEAVELR	18	Unmodified	_ALVPSGASTGEHEAVELR_	W8USI1	Enolase OS=Staphylococcus aureus OX=1280 GN=eno PE=3 SV=1	2	911.968	-0.39704	2.6167e-12	120.9	1
204	ALVPSGASTGEHEAVELR	18	Unmodified	_ALVPSGASTGEHEAVELR_	W8USI1	Enolase OS=Staphylococcus aureus OX=1280 GN=eno PE=3 SV=1	3	608.315	-1.158	0.00025448	69.979	1
205	ALYLQGYNSAK	11	Unmodified	_ALYLQGYNSAK_	T1Y6B2	Acid phosphatase OS=Staphylococcus aureus subsp. aureus CN1 OX=1193576 GN=SAKOR_00299 PE=4 SV=1	2	614.322	1.8738	1.9616e-06	121.61	1
206	AMEELYEQGK	10	Unmodified	_AMEELYEQGK_	A0A5C8X8E8	Aldo/keto reductase (Fragment) OS=Staphylococcus aureus OX=1280 GN=FVP29_09260 PE=4 SV=1	2	599.276	0.43002	0.00019767	105.98	1
207	ANDVVGEQVK	10	Unmodified	_ANDVVGEQVK_	A0A6B1RNF5	Triose-phosphate isomerase OS=Staphylococcus aureus OX=1280 GN=GAY51_03870 PE=4 SV=1	2	529.777	-0.61357	0.00022594	111.73	1
208	ANDVVGEQVKK	11	malon(K)	_ANDVVGEQVK(ma)K_	A0A6B1RNF5	Triose-phosphate isomerase OS=Staphylococcus aureus OX=1280 GN=GAY51_03870 PE=4 SV=1	2	636.825	-0.9309	0.015103	56.29	1
209	ANEDESQWNSLLEK	14	Unmodified	_ANEDESQWNSLLEK_	T1Y9N5	Transketolase OS=Staphylococcus aureus subsp. aureus CN1 OX=1193576 GN=SAKOR_01278 PE=3 SV=1	2	831.884	0.31562	4.0305e-37	189.1	1
210	ANHEQIIEAIK	11	Unmodified	_ANHEQIIEAIK_	T1Y5Y2	50S ribosomal protein L7/L12 OS=Staphylococcus aureus subsp. aureus CN1 OX=1193576 GN=rplL PE=3 SV=1	3	422.566	-0.79287	0.00072688	79.659	1
211	ANHEQIIEAIK	11	Unmodified	_ANHEQIIEAIK_	T1Y5Y2	50S ribosomal protein L7/L12 OS=Staphylococcus aureus subsp. aureus CN1 OX=1193576 GN=rplL PE=3 SV=1	2	633.346	-0.91036	2.561e-28	188.15	1
212	ANHEQIIEAIK	11	Unmodified	_ANHEQIIEAIK_	T1Y5Y2	50S ribosomal protein L7/L12 OS=Staphylococcus aureus subsp. aureus CN1 OX=1193576 GN=rplL PE=3 SV=1	3	422.566	0.099954	0.0091081	49.448	1
213	ANHEQIIEAIK	11	Deamidation (NQ)	_AN(de)HEQIIEAIK_	T1Y5Y2	50S ribosomal protein L7/L12 OS=Staphylococcus aureus subsp. aureus CN1 OX=1193576 GN=rplL PE=3 SV=1	3	422.894	1.3223	0.0058865	59.418	1
214	ANHEQIIEAIK	11	Deamidation (NQ)	_AN(de)HEQIIEAIK_	T1Y5Y2	50S ribosomal protein L7/L12 OS=Staphylococcus aureus subsp. aureus CN1 OX=1193576 GN=rplL PE=3 SV=1	2	633.838	2.2577	0.0018032	101.32	1
215	ANHEQIIEAIK	11	Deamidation (NQ)	_AN(de)HEQIIEAIK_	T1Y5Y2	50S ribosomal protein L7/L12 OS=Staphylococcus aureus subsp. aureus CN1 OX=1193576 GN=rplL PE=3 SV=1	3	422.894	0.026511	0.0015994	73.951	1
216	ANHEQIIEAIK	11	Deamidation (NQ)	_AN(de)HEQIIEAIK_	T1Y5Y2	50S ribosomal protein L7/L12 OS=Staphylococcus aureus subsp. aureus CN1 OX=1193576 GN=rplL PE=3 SV=1	2	633.838	0.20703	0.0021177	100.22	1
217	ANNVATDANHSYTSR	15	Unmodified	_ANNVATDANHSYTSR_	W8UWZ6	DUF948 domain-containing protein OS=Staphylococcus aureus OX=1280 GN=ytxG PE=4 SV=1	3	540.917	-0.28301	0.00040431	81.327	1
218	ANNVATDANHSYTSR	15	Unmodified	_ANNVATDANHSYTSR_	W8UWZ6	DUF948 domain-containing protein OS=Staphylococcus aureus OX=1280 GN=ytxG PE=4 SV=1	3	540.917	-0.43704	3.7828e-12	123.1	1
219	ANNVATDANHSYTSR	15	Unmodified	_ANNVATDANHSYTSR_	W8UWZ6	DUF948 domain-containing protein OS=Staphylococcus aureus OX=1280 GN=ytxG PE=4 SV=1	2	810.872	-1.0794	8.3181e-08	116.86	1
220	ANNVATDANHSYTSR	15	Deamidation (NQ)	_AN(de)NVATDANHSYTSR_	W8UWZ6	DUF948 domain-containing protein OS=Staphylococcus aureus OX=1280 GN=ytxG PE=4 SV=1	3	541.245	0.5225	0.011689	43.69	1
221	ANQSATTNNTKPVAK	15	Unmodified	_ANQSATTNNTKPVAK_	A0A142G9F0	N-acetylmuramoyl-L-alanine amidase OS=Staphylococcus aureus OX=1280 GN=atl PE=4 SV=1	3	515.606		0.010044	37.366	1
222	APAIFVIQNNNYAISTPR	18	Deamidation (NQ)	_APAIFVIQ(de)NNNYAISTPR_	A0A0U1MY72	Pyruvate dehydrogenase E1 component subunit alpha OS=Staphylococcus aureus OX=1280 GN=pdhA PE=4 SV=1	3	664.018		0.00012883	52.862	1
223	APDVGDYKYGFHDEDVSIFR	20	malon(K)	_APDVGDYK(ma)YGFHDEDVSIFR_	A0A1Q8DAZ4	Fe-S cluster assembly protein SufB OS=Staphylococcus aureus OX=1280 GN=BSZ10_12555 PE=4 SV=1	3	806.029	0.42253	7.8293e-05	75.533	1
224	APGSVGMASDASR	13	Oxidation (M)	_APGSVGM(ox)ASDASR_	W8U3W0	50S ribosomal protein L3 OS=Staphylococcus aureus OX=1280 GN=rplC PE=1 SV=1	2	611.28	-0.68714	0.0015249	74.475	1
225	APGSVGMASDASR	13	Unmodified	_APGSVGMASDASR_	W8U3W0	50S ribosomal protein L3 OS=Staphylococcus aureus OX=1280 GN=rplC PE=1 SV=1	2	603.283	-1.3396	0.0015866	84.297	1
226	APGSVGMASDASR	13	Unmodified	_APGSVGMASDASR_	W8U3W0	50S ribosomal protein L3 OS=Staphylococcus aureus OX=1280 GN=rplC PE=1 SV=1	2	603.283	0.67699	0.0020957	80.96	1
227	APGSVGMASDASR	13	Unmodified	_APGSVGMASDASR_	W8U3W0	50S ribosomal protein L3 OS=Staphylococcus aureus OX=1280 GN=rplC PE=1 SV=1	2	603.283	1.189	0.0080946	63.185	1
228	APPETFIEPNK	11	Unmodified	_APPETFIEPNK_	A0A6B5IWQ1	Ribonuclease J (Fragment) OS=Staphylococcus aureus OX=1280 GN=G0Y39_12630 PE=4 SV=1	2	621.822	-0.39584	0.0016529	85.813	1
229	APTKKAQSK	9	Acetyl (Protein N-term),2 malon(K)	_(ac)APTK(ma)K(ma)AQSK_	A0A6B3J3J6	LPXTG cell wall anchor domain-containing protein (Fragment) OS=Staphylococcus aureus OX=1280 GN=G0004_13780 PE=4 SV=1	2	586.793	0.84002	0.02547	42.19	1
230	APVSLSSEAEYQR	13	Unmodified	_APVSLSSEAEYQR_	A0A380DMP1	Ornithine aminotransferase OS=Staphylococcus aureus OX=1280 GN=rocD2_3 PE=4 SV=1	2	718.854	0.32778	0.0035847	72.891	1
231	AQAHIEAGAKK	11	malon(K)	_AQAHIEAGAK(ma)K_	T1Y6M8	Glyceraldehyde-3-phosphate dehydrogenase OS=Staphylococcus aureus subsp. aureus CN1 OX=1193576 GN=SAKOR_00776 PE=3 SV=1	2	605.315	-0.37688	0.0043674	69.261	1
232	AQEDVLAGLTEVLNK	15	Unmodified	_AQEDVLAGLTEVLNK_	A0A6A9GTV7	Catabolite control protein A OS=Staphylococcus aureus OX=1280 GN=ccpA PE=4 SV=1	2	800.433	0.37336	0.00069758	89.358	1
233	AQELDELQAK	10	Unmodified	_AQELDELQAK_	X5E0B0	Glutamyl-tRNA(Gln) amidotransferase subunit A OS=Staphylococcus aureus OX=1280 GN=gatA PE=3 SV=1	2	572.796	1.8457	0.013569	54.784	1
234	AQENGLTVVDAFNFEAPK	18	Deamidation (NQ)	_AQEN(de)GLTVVDAFNFEAPK_	A0A380DTQ1	50S ribosomal protein L4 OS=Staphylococcus aureus OX=1280 GN=rplD PE=4 SV=1	2	975.976	-1.763	0.014512	70.094	1
235	AQENGLTVVDAFNFEAPK	18	Unmodified	_AQENGLTVVDAFNFEAPK_	A0A380DTQ1	50S ribosomal protein L4 OS=Staphylococcus aureus OX=1280 GN=rplD PE=4 SV=1	2	975.484	1.0067	5.6439e-06	100.97	1
236	AQENGLTVVDAFNFEAPK	18	Unmodified	_AQENGLTVVDAFNFEAPK_	A0A380DTQ1	50S ribosomal protein L4 OS=Staphylococcus aureus OX=1280 GN=rplD PE=4 SV=1	3	650.658	0.82999	0.0010008	61.757	1
237	AQEQAQAIEK	10	Unmodified	_AQEQAQAIEK_	A0A0E1X434	UPF0342 protein HMPREF0769_11833 OS=Staphylococcus aureus subsp. aureus MN8 OX=548470 GN=HMPREF0769_11833 PE=3 SV=1	2	558.288	1.1208	3.055e-08	152.07	1
238	AQEQAQAIEK	10	Unmodified	_AQEQAQAIEK_	A0A0E1X434	UPF0342 protein HMPREF0769_11833 OS=Staphylococcus aureus subsp. aureus MN8 OX=548470 GN=HMPREF0769_11833 PE=3 SV=1	2	558.288	0.96879	0.00024221	104.82	1
239	AQEQAQAIEKDENISALMNAEQK	23	Unmodified	_AQEQAQAIEKDENISALMNAEQK_	A0A0E1X434	UPF0342 protein HMPREF0769_11833 OS=Staphylococcus aureus subsp. aureus MN8 OX=548470 GN=HMPREF0769_11833 PE=3 SV=1	3	853.75	-2.108	9.9171e-24	134.47	1
240	AQHDEAQQNAFYQVLNMPNLNADQR	25	Oxidation (M)	_AQHDEAQQNAFYQVLNM(ox)PNLNADQR_	D7RHB1	SpA IgG-binding domain protein (Fragment) OS=Staphylococcus aureus OX=1280 PE=4 SV=1	3	977.786	0.54976	3.8172e-15	100.04	1
241	AQHNDAVGPTK	11	Unmodified	_AQHNDAVGPTK_	W8TMZ7	Glutamate dehydrogenase OS=Staphylococcus aureus OX=1280 GN=gudB PE=3 SV=1	3	379.86	0.36878	0.0042135	58.511	1
242	AQIEQIFVQTR	11	Unmodified	_AQIEQIFVQTR_	T1Y5L6	L-lactate dehydrogenase OS=Staphylococcus aureus subsp. aureus CN1 OX=1193576 GN=ldh PE=3 SV=1	2	666.867	0.72216	0.00091273	90.614	1
243	AQKPVDNITQIIGGTPVVK	19	Unmodified	_AQKPVDNITQIIGGTPVVK_	W8TRW6	Cysteine synthase OS=Staphylococcus aureus OX=1280 GN=cysK PE=3 SV=1	3	660.049	-2.1312	1.9036e-10	111.73	1
244	AQLTVPDNK	9	Unmodified	_AQLTVPDNK_	W8TQJ7	Cytochrome aa3 quinol oxidase subunit I OS=Staphylococcus aureus OX=1280 GN=qoxB PE=3 SV=1	2	493.269	-1.1856	0.0019844	95.09	1
245	AQMADSVNNVK	11	Unmodified	_AQMADSVNNVK_	W8TWX6	DAK2 domain fusion protein YloV OS=Staphylococcus aureus OX=1280 GN=DDL17_06185 PE=4 SV=1	2	588.788	0.81569	0.0033972	77.358	1
246	AQMQGKDLILNVGYSHPVEIK	21	malon(K)	_AQMQGK(ma)DLILNVGYSHPVEIK_	W8U3X2	50S ribosomal protein L6 OS=Staphylococcus aureus OX=1280 GN=rplF PE=1 SV=1	3	809.418	0.51617	0.0003363	65.149	1
247	AQSEQDQAFLSK	12	Unmodified	_AQSEQDQAFLSK_	W8TMY9	2-keto-4-pentenoate hydratase OS=Staphylococcus aureus OX=1280 GN=yisK PE=4 SV=1	2	676.328	0.16438	6.5966e-07	109	1
248	ARQKWTLK	8	Deamidation (NQ),malon(K)	_ARQ(de)K(ma)WTLK_	A0A1Q1PSV0	Uncharacterized protein (Fragment) OS=Staphylococcus aureus subsp. aureus OX=46170 PE=4 SV=1	2	559.304	-2.0614	0.022327	40.067	1
249	ASALKAQQAAIK	12	malon(K)	_ASALK(ma)AQQAAIK_	A0A6B1RTI2	Uncharacterized protein OS=Staphylococcus aureus OX=1280 GN=GAY51_06375 PE=4 SV=1	2	643.359		0.0049931	54.898	1
250	ASEDAPVGPGPR	12	Unmodified	_ASEDAPVGPGPR_	W8TSP0	Dipeptidase PepV OS=Staphylococcus aureus OX=1280 GN=sapep PE=4 SV=1	2	576.786	0.44419	0.00021316	94.767	1
251	ASEDNEWNLK	10	Unmodified	_ASEDNEWNLK_	A0A6B0BDT6	NADP-dependent phosphogluconate dehydrogenase (Fragment) OS=Staphylococcus aureus OX=1280 GN=gndA PE=4 SV=1	2	603.275	1.8042	0.00029734	123.75	1
252	ASIVVEAANGPTTPEATR	18	Unmodified	_ASIVVEAANGPTTPEATR_	W8TMZ7	Glutamate dehydrogenase OS=Staphylococcus aureus OX=1280 GN=gudB PE=3 SV=1	2	892.463	-0.83953	1.254e-29	119.08	1
253	ASKFPYAANGR	11	Deamidation (NQ),malon(K)	_ASK(ma)FPYAAN(de)GR_	W8URN4	Dihydrolipoyl dehydrogenase OS=Staphylococcus aureus OX=1280 GN=lpdA PE=3 SV=1	2	634.799		0.0073392	52.576	1
254	ASKGQANPQLVNQLLK	16	malon(K)	_ASK(ma)GQANPQLVNQLLK_	A0A2Y9TRY4	Aspartyl/glutamyl-tRNA(Asn/Gln) amidotransferase subunit B OS=Staphylococcus aureus OX=1280 GN=gatB PE=3 SV=1	2	897.989		9.5889e-05	60.062	1
255	ASLIEAVAETSDELMEK	17	Oxidation (M)	_ASLIEAVAETSDELM(ox)EK_	W8UT26	Elongation factor G OS=Staphylococcus aureus OX=1280 GN=fusA PE=3 SV=1	3	617.968	-0.12768	0.00080479	70.117	1
256	ASLIEAVAETSDELMEK	17	Oxidation (M)	_ASLIEAVAETSDELM(ox)EK_	W8UT26	Elongation factor G OS=Staphylococcus aureus OX=1280 GN=fusA PE=3 SV=1	2	926.448	0.6571	3.9572e-05	92.264	1
257	ASLKSIIR	8	malon(K)	_ASLK(ma)SIIR_	Q99WA2	50S ribosomal protein L25 OS=Staphylococcus aureus (strain Mu50 / ATCC 700699) OX=158878 GN=rplY PE=3 SV=1	2	487.287	0.91849	0.021252	85.533	1
258	ASNPEEEVIAK	11	Unmodified	_ASNPEEEVIAK_	W8UT26	Elongation factor G OS=Staphylococcus aureus OX=1280 GN=fusA PE=3 SV=1	2	593.801	1.3454	0.0045002	72.817	1
259	ASSPVIEK	8	Unmodified	_ASSPVIEK_	T1YBB3	50S ribosomal protein L22 OS=Staphylococcus aureus subsp. aureus CN1 OX=1193576 GN=rplV PE=3 SV=1	2	415.735	0.21836	0.018409	76.679	1
260	ATDFIDK	7	Unmodified	_ATDFIDK_	A0A6B0AR42	CsbD family protein OS=Staphylococcus aureus OX=1280 GN=GO661_09025 PE=4 SV=1	2	405.206	0.84986	0.0084575	117.18	1
261	ATDFIDKLK	9	malon(K)	_ATDFIDK(ma)LK_	A0A6B0AR42	CsbD family protein OS=Staphylococcus aureus OX=1280 GN=GO661_09025 PE=4 SV=1	2	568.795	-1.2885	0.0059772	89.047	1
262	ATHEEGILHPVEIIESMQK	19	Unmodified	_ATHEEGILHPVEIIESMQK_	T1YBP0	Acetolactate synthase OS=Staphylococcus aureus subsp. aureus CN1 OX=1193576 GN=SAKOR_02175 PE=3 SV=1	4	541.029	2.5659	0.023983	21.676	1
263	ATIGQVGNLQHELVNVGK	18	Unmodified	_ATIGQVGNLQHELVNVGK_	B3VKN3	50S ribosomal protein L2 OS=Staphylococcus aureus OX=1280 GN=rap PE=1 SV=1	3	626.346	0.88948	1.0613e-05	91.317	1
264	ATIGQVGNLQHELVNVGK	18	Unmodified	_ATIGQVGNLQHELVNVGK_	B3VKN3	50S ribosomal protein L2 OS=Staphylococcus aureus OX=1280 GN=rap PE=1 SV=1	2	939.016	0.073477	6.4873e-37	172.12	1
265	ATIVCEPSLVIFANK	15	Unmodified	_ATIVCEPSLVIFANK_	W8U6K8	Ribonuclease 3 OS=Staphylococcus aureus OX=1280 GN=rnc PE=3 SV=1	2	831.45	-0.23816	0.0036569	69.261	1
266	ATQLGTIANETIK	13	Unmodified	_ATQLGTIANETIK_	A0A6B5INL4	YtxH domain-containing protein (Fragment) OS=Staphylococcus aureus OX=1280 GN=G0Y40_12015 PE=4 SV=1	2	680.378	-0.88991	0.004133	69.92	1
267	ATQLGTIANETIK	13	Unmodified	_ATQLGTIANETIK_	A0A6B5INL4	YtxH domain-containing protein (Fragment) OS=Staphylococcus aureus OX=1280 GN=G0Y40_12015 PE=4 SV=1	2	680.378	-0.29441	0.0010947	88.075	1
268	AVAGEGPTLIETMTYR	16	Unmodified	_AVAGEGPTLIETMTYR_	A0A0U1MY72	Pyruvate dehydrogenase E1 component subunit alpha OS=Staphylococcus aureus OX=1280 GN=pdhA PE=4 SV=1	2	854.932	-0.95783	1.8179e-18	144.29	1
269	AVAGLSEEQLK	11	Unmodified	_AVAGLSEEQLK_	A0A6B1RNF5	Triose-phosphate isomerase OS=Staphylococcus aureus OX=1280 GN=GAY51_03870 PE=4 SV=1	2	572.814	-0.82465	0.0012238	88.596	1
270	AVDTGDGVLLVVK	13	Unmodified	_AVDTGDGVLLVVK_	A0A6B5AFN7	Dihydroxyacetone kinase (Fragment) OS=Staphylococcus aureus OX=1280 GN=G0U86_02005 PE=4 SV=1	2	643.372	-0.13538	0.0078083	63.662	1
271	AVIIATGAEYK	11	Unmodified	_AVIIATGAEYK_	Q9KX07	Thioredoxin reductase (Fragment) OS=Staphylococcus aureus OX=1280 PE=3 SV=1	2	568.322	0.64051	0.027334	53.013	1
272	AVITVPAYFNDAER	14	Unmodified	_AVITVPAYFNDAER_	A0A6B5UN24	Molecular chaperone DnaK OS=Staphylococcus aureus OX=1280 GN=dnaK PE=4 SV=1	2	783.402	-0.23095	0.0023909	81.904	1
273	AVITVPAYFNDAER	14	Unmodified	_AVITVPAYFNDAER_	A0A6B5UN24	Molecular chaperone DnaK OS=Staphylococcus aureus OX=1280 GN=dnaK PE=4 SV=1	2	783.402	0.11068	0.0019159	84.753	1
274	AVKEATGLGLK	11	malon(K)	_AVK(ma)EATGLGLK_	T1Y5Y2	50S ribosomal protein L7/L12 OS=Staphylococcus aureus subsp. aureus CN1 OX=1193576 GN=rplL PE=3 SV=1	2	586.83	1.1496	0.006972	73.877	1
275	AVKEATGLGLK	11	malon(K)	_AVK(ma)EATGLGLK_	T1Y5Y2	50S ribosomal protein L7/L12 OS=Staphylococcus aureus subsp. aureus CN1 OX=1193576 GN=rplL PE=3 SV=1	2	586.83	1.0119	0.00015063	102.9	1
276	AVKILSQEDYFDK	13	malon(K)	_AVK(ma)ILSQEDYFDK_	A0A6B5I3U4	Transcriptional regulator (Fragment) OS=Staphylococcus aureus OX=1280 GN=G0V76_13030 PE=4 SV=1	2	821.404	2.6999	6.9632e-07	110.84	1
277	AVMAATLGS	9	Unmodified	_AVMAATLGS_	Q8NUK8	Ornithine carbamoyltransferase, catabolic OS=Staphylococcus aureus (strain MW2) OX=196620 GN=arcB PE=3 SV=1	1	820.423	-0.067311	0.028464	34.892	1
278	AVMKPVEGTILTVAK	15	Oxidation (M)	_AVM(ox)KPVEGTILTVAK_	W8TWX6	DAK2 domain fusion protein YloV OS=Staphylococcus aureus OX=1280 GN=DDL17_06185 PE=4 SV=1	3	524.972	0.24702	0.0018687	59.68	1
279	AVNEFDVGNLYLNR	14	Unmodified	_AVNEFDVGNLYLNR_	A0A6D1RS46	Delta-1-pyrroline-5-carboxylate dehydrogenase OS=Staphylococcus aureus OX=1280 GN=rocA PE=4 SV=1	2	812.41	2.4281	1.9678e-07	115.12	1
280	AVQNAVETLK	10	Unmodified	_AVQNAVETLK_	A0A6B5I4K3	Asp-tRNA(Asn)/Glu-tRNA(Gln) amidotransferase subunit GatA OS=Staphylococcus aureus OX=1280 GN=gatA PE=4 SV=1	2	536.803	-0.57574	0.0019342	88.948	1
281	AVVVQEAQR	9	Unmodified	_AVVVQEAQR_	W8TZY6	2-oxoisovalerate dehydrogenase OS=Staphylococcus aureus OX=1280 GN=pdhB PE=4 SV=1	2	500.283	-0.026783	0.0010376	109.71	1
282	AWHDHSDAISK	11	Unmodified	_AWHDHSDAISK_	W8U1R6	Alkyl hydroperoxide reductase C OS=Staphylococcus aureus OX=1280 GN=ahpC PE=3 SV=1	3	422.867	1.1679	7.7782e-10	145.23	1
283	AYAALTTETVQEAQTR	16	Unmodified	_AYAALTTETVQEAQTR_	A0A6B5L6B0	Hsp33 family molecular chaperone HslO (Fragment) OS=Staphylococcus aureus OX=1280 GN=hslO PE=4 SV=1	2	876.942	0.19348	0.020872	47.548	1
284	AYAVTKPQTTQTVSK	15	Unmodified	_AYAVTKPQTTQTVSK_	A0A142G9F0	N-acetylmuramoyl-L-alanine amidase OS=Staphylococcus aureus OX=1280 GN=atl PE=4 SV=1	3	541.63	0.0046026	0.00061386	77.746	1
285	AYAVTKPQTTQTVSK	15	Unmodified	_AYAVTKPQTTQTVSK_	A0A142G9F0	N-acetylmuramoyl-L-alanine amidase OS=Staphylococcus aureus OX=1280 GN=atl PE=4 SV=1	3	541.63	0.24157	0.0015771	64.52	1
286	AYGAELVLTPGSEAMK	16	Unmodified	_AYGAELVLTPGSEAMK_	W8TRW6	Cysteine synthase OS=Staphylococcus aureus OX=1280 GN=cysK PE=3 SV=1	2	818.916	0.60048	4.1831e-08	116.78	1
287	AYITPGLGDAGDR	13	Unmodified	_AYITPGLGDAGDR_	W8U942	Uracil phosphoribosyltransferase OS=Staphylococcus aureus OX=1280 GN=upp PE=3 SV=1	2	653.325		2.5263e-06	77.894	1
288	AYLAEPVAPK	10	Unmodified	_AYLAEPVAPK_	A0A142G9F0	N-acetylmuramoyl-L-alanine amidase OS=Staphylococcus aureus OX=1280 GN=atl PE=4 SV=1	2	529.798	-1.5284	0.0088638	68.657	1
289	AYLESEEEDNPTIGDMIGDK	20	Oxidation (M)	_AYLESEEEDNPTIGDM(ox)IGDK_	Q6GGT5	30S ribosomal protein S1 OS=Staphylococcus aureus (strain MRSA252) OX=282458 GN=rpsA PE=3 SV=1	3	747.995	1.731	0.0033436	49.592	1
290	AYLESEEEDNPTIGDMIGDK	20	Unmodified	_AYLESEEEDNPTIGDMIGDK_	Q6GGT5	30S ribosomal protein S1 OS=Staphylococcus aureus (strain MRSA252) OX=282458 GN=rpsA PE=3 SV=1	3	742.663	-2.2825	0.0004497	62.739	1
291	AYLESEEEDNPTIGDMIGDK	20	Unmodified	_AYLESEEEDNPTIGDMIGDK_	Q6GGT5	30S ribosomal protein S1 OS=Staphylococcus aureus (strain MRSA252) OX=282458 GN=rpsA PE=3 SV=1	2	1113.49	-0.63624	1.1761e-27	154.55	1
292	AYLLVEPDLTFDK	13	Unmodified	_AYLLVEPDLTFDK_	T1Y8C2	Phosphoenolpyruvate-protein phosphotransferase OS=Staphylococcus aureus subsp. aureus CN1 OX=1193576 GN=SAKOR_01005 PE=3 SV=1	2	762.403	-2.0915	0.0034028	73.877	1
293	AYLVDTAKPTPTPK	14	Unmodified	_AYLVDTAKPTPTPK_	A0A142G9F0	N-acetylmuramoyl-L-alanine amidase OS=Staphylococcus aureus OX=1280 GN=atl PE=4 SV=1	2	751.417	-2.7213	3.0488e-19	153.81	1
294	AYPLLNSSWQGNEIVLHK	18	Unmodified	_AYPLLNSSWQGNEIVLHK_	A0A5C8X1Y9	2-oxo acid dehydrogenase subunit E2 (Fragment) OS=Staphylococcus aureus OX=1280 GN=FVP29_19450 PE=4 SV=1	3	690.365	0.19582	1.4865e-05	89.358	1
295	AYVDHPQTHFPLNEQGK	17	Unmodified	_AYVDHPQTHFPLNEQGK_	A0A6B5L6B0	Hsp33 family molecular chaperone HslO (Fragment) OS=Staphylococcus aureus OX=1280 GN=hslO PE=4 SV=1	4	495.995	-0.86975	0.019309	27.526	1
296	AYVGTTDTFYDNIK	14	Unmodified	_AYVGTTDTFYDNIK_	Q99UH2	Aerobic glycerol-3-phosphate dehydrogenase OS=Staphylococcus aureus (strain Mu50 / ATCC 700699) OX=158878 GN=glpD PE=3 SV=2	2	804.383	0.39626	0.0023909	81.904	1
297	CEYCTTGR	8	Unmodified	_CEYCTTGR_	A0A6B1RIE9	Alcohol dehydrogenase AdhP OS=Staphylococcus aureus OX=1280 GN=adhP PE=4 SV=1	2	523.705	0.27084	0.026329	68.016	1
298	CMSQPLFR	8	Oxidation (M)	_CM(ox)SQPLFR_	T1YD05	Arginine deiminase OS=Staphylococcus aureus subsp. aureus CN1 OX=1193576 GN=arcA PE=3 SV=1	2	527.744	2.9582	0.010998	70.525	1
299	CQAQLVEGLIHFVSR	15	Unmodified	_CQAQLVEGLIHFVSR_	Q9AIU7	DNA ligase OS=Staphylococcus aureus OX=1280 GN=ligA PE=1 SV=1	3	586.31	-2.7053	0.019444	30.072	1
300	CVKDTEGMSPAK	12	malon(K)	_CVK(ma)DTEGMSPAK_	W5TZ48	Neomycin phosphotransferase III (Fragment) OS=Staphylococcus aureus OX=1280 PE=4 SV=1	2	704.808	-1.6873	0.031551	54.812	1
301	DAAYDIIQAK	10	Unmodified	_DAAYDIIQAK_	T1Y5L6	L-lactate dehydrogenase OS=Staphylococcus aureus subsp. aureus CN1 OX=1193576 GN=ldh PE=3 SV=1	2	554.288	0.3401	0.011813	66.056	1
302	DADLVVITAGAPQKPGETR	19	Unmodified	_DADLVVITAGAPQKPGETR_	T1YCW9	L-lactate dehydrogenase OS=Staphylococcus aureus subsp. aureus CN1 OX=1193576 GN=ldh PE=3 SV=1	3	646.681	2.0608	5.9181e-07	92.474	1
303	DADLVVITAGAPQKPGETR	19	Unmodified	_DADLVVITAGAPQKPGETR_	T1YCW9	L-lactate dehydrogenase OS=Staphylococcus aureus subsp. aureus CN1 OX=1193576 GN=ldh PE=3 SV=1	3	646.681	3.8672	0.0013073	56.708	1
305	DALKTALEGQDIEEIKSKKEELEK	24	Unmodified	_DALKTALEGQDIEEIKSKKEELEK_	A0A6B5UN24	Molecular chaperone DnaK OS=Staphylococcus aureus OX=1280 GN=dnaK PE=4 SV=1	3	915.49	-0.048444	0.030958	1.7667	1
306	DAMENGVLAGYPLIDVK	17	Oxidation (M)	_DAM(ox)ENGVLAGYPLIDVK_	W8UT26	Elongation factor G OS=Staphylococcus aureus OX=1280 GN=fusA PE=3 SV=1	2	910.959	-1.5132	0.0012257	67.645	1
307	DASTLAHK	8	Unmodified	_DASTLAHK_	W8U1R6	Alkyl hydroperoxide reductase C OS=Staphylococcus aureus OX=1280 GN=ahpC PE=3 SV=1	2	421.722	1.4455	0.021383	73.248	1
308	DCPFNIEGGDELVLSK	16	Unmodified	_DCPFNIEGGDELVLSK_	T1YD05	Arginine deiminase OS=Staphylococcus aureus subsp. aureus CN1 OX=1193576 GN=arcA PE=3 SV=1	2	896.925	0.32223	1.3199e-17	137.61	1
309	DCPFNIEGGDELVLSK	16	Unmodified	_DCPFNIEGGDELVLSK_	T1YD05	Arginine deiminase OS=Staphylococcus aureus subsp. aureus CN1 OX=1193576 GN=arcA PE=3 SV=1	3	598.286	0.39917	0.00045554	75.018	1
310	DDPFNPAIALNK	12	Unmodified	_DDPFNPAIALNK_	Q53664	Extramembranal protein OS=Staphylococcus aureus OX=1280 GN=dltD PE=4 SV=1	2	657.838	1.716	0.01385	58.172	1
311	DDPNINPEECVVVSPDHGGVTR	22	Unmodified	_DDPNINPEECVVVSPDHGGVTR_	A0A5C8X2B0	Ribose-phosphate pyrophosphokinase (Fragment) OS=Staphylococcus aureus OX=1280 GN=FVP29_19975 PE=3 SV=1	3	802.705	1.1638	9.0335e-05	64.749	1
312	DDPSQSANLLAEAK	14	Unmodified	_DDPSQSANLLAEAK_	A1KE71	Immunoglobulin G binding protein A (Fragment) OS=Staphylococcus aureus OX=1280 GN=spa PE=4 SV=1	2	729.857	-1.7673	0.0020941	83.692	1
313	DDPSQSANLLSEAK	14	Unmodified	_DDPSQSANLLSEAK_	A1KE71	Immunoglobulin G binding protein A (Fragment) OS=Staphylococcus aureus OX=1280 GN=spa PE=4 SV=1	2	737.855	0.86427	1.7474e-07	115.68	1
314	DDPSQSANVLGEAK	14	Unmodified	_DDPSQSANVLGEAK_	A1KE71	Immunoglobulin G binding protein A (Fragment) OS=Staphylococcus aureus OX=1280 GN=spa PE=4 SV=1	2	715.842	1.7436	2.4571e-11	121.18	1
315	DDPSQSANVLGEAK	14	Unmodified	_DDPSQSANVLGEAK_	A1KE71	Immunoglobulin G binding protein A (Fragment) OS=Staphylococcus aureus OX=1280 GN=spa PE=4 SV=1	2	715.842	1.4393	0.0031088	77.42	1
316	DEGEVTASDITHDSDVEILNPELK	24	Unmodified	_DEGEVTASDITHDSDVEILNPELK_	W8TRE8	DNA-directed RNA polymerase subunit alpha OS=Staphylococcus aureus OX=1280 GN=rpoA PE=3 SV=1	3	876.084	0.21981	9.7177e-41	162.11	1
317	DELPLPENVNIVTK	14	Unmodified	_DELPLPENVNIVTK_	W8TMY9	2-keto-4-pentenoate hydratase OS=Staphylococcus aureus OX=1280 GN=yisK PE=4 SV=1	2	790.93	0.096878	4.531e-07	108.58	1
318	DENISALMNAEQK	13	Oxidation (M)	_DENISALM(ox)NAEQK_	A0A0E1X434	UPF0342 protein HMPREF0769_11833 OS=Staphylococcus aureus subsp. aureus MN8 OX=548470 GN=HMPREF0769_11833 PE=3 SV=1	2	739.843	2.9251	5.2883e-11	124.51	1
319	DEQGFIEQDIQR	12	Unmodified	_DEQGFIEQDIQR_	W8UAB2	Transcription elongation factor GreA OS=Staphylococcus aureus OX=1280 GN=greA PE=3 SV=1	2	739.35	-3.9704	0.023052	52.816	1
320	DESFTSNSSNAQATDSVSER	20	Unmodified	_DESFTSNSSNAQATDSVSER_	T1Y861	Cell division protein FtsZ OS=Staphylococcus aureus subsp. aureus CN1 OX=1193576 GN=ftsZ PE=3 SV=1	2	1066.45	-0.40722	1.7487e-36	161.08	1
321	DESFTSNSSNAQATDSVSER	20	Unmodified	_DESFTSNSSNAQATDSVSER_	T1Y861	Cell division protein FtsZ OS=Staphylococcus aureus subsp. aureus CN1 OX=1193576 GN=ftsZ PE=3 SV=1	3	711.305	-0.97173	5.121e-07	90.718	1
322	DFASLLHEDLK	11	Unmodified	_DFASLLHEDLK_	T1YAQ4	30S ribosomal protein S3 OS=Staphylococcus aureus subsp. aureus CN1 OX=1193576 GN=rpsC PE=3 SV=1	2	644.333	-2.5439	1.5517e-06	108.35	1
323	DFASLLHEDLK	11	Unmodified	_DFASLLHEDLK_	T1YAQ4	30S ribosomal protein S3 OS=Staphylococcus aureus subsp. aureus CN1 OX=1193576 GN=rpsC PE=3 SV=1	3	429.891	-2.2486	0.0068824	53.211	1
324	DFVNALPTLPDSK	13	Unmodified	_DFVNALPTLPDSK_	A0A6B1RNF5	Triose-phosphate isomerase OS=Staphylococcus aureus OX=1280 GN=GAY51_03870 PE=4 SV=1	2	708.872	1.7715	0.0022939	79.885	1
325	DGAYDIHFVK	10	Unmodified	_DGAYDIHFVK_	D2JTI8	Immunodominant antigen A (Fragment) OS=Staphylococcus aureus OX=1280 GN=SA2356 PE=4 SV=1	3	388.861	0.59427	0.0193	37.73	1
326	DGAYDIHFVK	10	Unmodified	_DGAYDIHFVK_	D2JTI8	Immunodominant antigen A (Fragment) OS=Staphylococcus aureus OX=1280 GN=SA2356 PE=4 SV=1	2	582.788		1.923e-12	117.28	1
327	DGETQVGEVAK	11	Unmodified	_DGETQVGEVAK_	A0A033UZD3	Chaperone protein DnaK OS=Staphylococcus aureus C0673 OX=1413510 GN=dnaK PE=2 SV=1	2	566.778	1.4815	3.195e-15	168.85	1
328	DGFYNIVR	8	Unmodified	_DGFYNIVR_	A0A5C8X2V3	30S ribosomal protein S6 (Fragment) OS=Staphylococcus aureus OX=1280 GN=FVP29_18255 PE=3 SV=1	2	492.251	0.21278	0.031253	63.565	1
329	DGNAHPLTQGTFIK	14	Deamidation (NQ)	_DGN(de)AHPLTQGTFIK_	Q2G1U3	Oligoendopeptidase F OS=Staphylococcus aureus (strain NCTC 8325) OX=93061 GN=SAOUHSC_00937 PE=3 SV=1	2	750.378	-1.0506	4.903e-06	111.64	1
330	DGNAHPLTQGTFIKYLETDDR	21	malon(K)	_DGNAHPLTQGTFIK(ma)YLETDDR_	Q2G1U3	Oligoendopeptidase F OS=Staphylococcus aureus (strain NCTC 8325) OX=93061 GN=SAOUHSC_00937 PE=3 SV=1	3	826.391	2.2166	0.00049351	62.589	1
331	DGNDLEEIDNAITTAK	16	Unmodified	_DGNDLEEIDNAITTAK_	T1Y9N5	Transketolase OS=Staphylococcus aureus subsp. aureus CN1 OX=1193576 GN=SAKOR_01278 PE=3 SV=1	2	859.908	0.81707	2.6395e-31	180.7	1
332	DGQPVDKVVGFQPK	14	Unmodified	_DGQPVDKVVGFQPK_	A0A2X2JXN0	Thioredoxin OS=Staphylococcus aureus OX=1280 GN=trxA_1 PE=4 SV=1	3	505.272	-0.18354	0.023554	32.152	1
333	DGQPVDKVVGFQPK	14	Unmodified	_DGQPVDKVVGFQPK_	A0A2X2JXN0	Thioredoxin OS=Staphylococcus aureus OX=1280 GN=trxA_1 PE=4 SV=1	2	757.404	-1.5707	1.3324e-06	110.22	1
334	DGQPVDKVVGFQPK	14	malon(K)	_DGQPVDK(ma)VVGFQPK_	A0A2X2JXN0	Thioredoxin OS=Staphylococcus aureus OX=1280 GN=trxA_1 PE=4 SV=1	2	800.404	1.4577	0.030391	51.495	1
335	DHAFQIENVITAR	13	Unmodified	_DHAFQIENVITAR_	A0A2X2JYX5	NADH dehydrogenase OS=Staphylococcus aureus OX=1280 GN=NCTC7878_00625 PE=4 SV=1	3	505.263	0.96317	0.024773	28.812	1
336	DHDEDELSHYSNATTDIEYK	20	Unmodified	_DHDEDELSHYSNATTDIEYK_	W8UAF4	Glycine--tRNA ligase OS=Staphylococcus aureus OX=1280 GN=glyS PE=3 SV=1	3	794.672	0.79601	6.1608e-21	142.88	1
337	DHPDYADLEK	10	Unmodified	_DHPDYADLEK_	A0A6B5QQ07	Thioredoxin family protein (Fragment) OS=Staphylococcus aureus OX=1280 GN=G0Y42_11745 PE=4 SV=1	3	401.516	0.97838	0.0285	25.474	1
338	DHSYTPLPNK	10	Unmodified	_DHSYTPLPNK_	Q8NW87	Alanine--tRNA ligase OS=Staphylococcus aureus (strain MW2) OX=196620 GN=alaS PE=3 SV=1	2	586.291	-0.17297	0.00022784	105.2	1
339	DIAIYAPLTGEYVK	14	Unmodified	_DIAIYAPLTGEYVK_	Q6GGY5	PTS system glucose-specific EIIA component OS=Staphylococcus aureus (strain MRSA252) OX=282458 GN=crr PE=3 SV=1	2	776.917	-0.92667	0.0030668	53.981	1
340	DIIKNFGEGLSETK	14	malon(K)	_DIIK(ma)NFGEGLSETK_	A0A6B5C3Z3	ABC transporter ATP-binding protein OS=Staphylococcus aureus OX=1280 GN=G0Y89_00645 PE=4 SV=1	2	818.907	2.5036	0.0037281	82.651	1
341	DIINHLNYK	9	Unmodified	_DIINHLNYK_	A0A6B5I3U4	Transcriptional regulator (Fragment) OS=Staphylococcus aureus OX=1280 GN=G0V76_13030 PE=4 SV=1	2	565.304	-2.7971	0.0032991	90.263	1
342	DIINHLNYK	9	Unmodified	_DIINHLNYK_	A0A6B5I3U4	Transcriptional regulator (Fragment) OS=Staphylococcus aureus OX=1280 GN=G0V76_13030 PE=4 SV=1	3	377.205	0.40352	0.026031	30.687	1
343	DIKNLVAGFVKSKEK	15	Deamidation (NQ),2 malon(K)	_DIK(ma)N(de)LVAGFVK(ma)SKEK_	A0A6B5T415	Phenylalanine--tRNA ligase subunit beta OS=Staphylococcus aureus OX=1280 GN=G0Z16_01135 PE=4 SV=1	2	924.983	0.49041	0.027847	47.774	1
344	DIMAEAEELK	10	Unmodified	_DIMAEAEELK_	T1Y5L6	L-lactate dehydrogenase OS=Staphylococcus aureus subsp. aureus CN1 OX=1193576 GN=ldh PE=3 SV=1	2	574.779	-4.2144	0.0072095	71.03	1
345	DIYDAIEETDPTIK	14	Unmodified	_DIYDAIEETDPTIK_	X5E0B0	Glutamyl-tRNA(Gln) amidotransferase subunit A OS=Staphylococcus aureus OX=1280 GN=gatA PE=3 SV=1	2	811.893	-1.3328	0.0022687	82.651	1
346	DKAQAHIEAGAK	12	malon(K)	_DK(ma)AQAHIEAGAK_	T1Y6M8	Glyceraldehyde-3-phosphate dehydrogenase OS=Staphylococcus aureus subsp. aureus CN1 OX=1193576 GN=SAKOR_00776 PE=3 SV=1	2	662.828	-0.23036	2.3842e-08	136.63	1
347	DKDEAPIALVGK	12	Unmodified	_DKDEAPIALVGK_	A0A380E280	Cytosol aminopeptidase OS=Staphylococcus aureus OX=1280 GN=pepA_1 PE=3 SV=1	3	419.235	0.40771	0.021791	34.768	1
348	DKDEAPIALVGK	12	Unmodified	_DKDEAPIALVGK_	A0A380E280	Cytosol aminopeptidase OS=Staphylococcus aureus OX=1280 GN=pepA_1 PE=3 SV=1	2	628.348	0.22724	0.00025168	102.87	1
349	DKEIQETAEVLSR	13	Unmodified	_DKEIQETAEVLSR_	A0A6B5I265	ATP-dependent Clp protease ATP-binding subunit OS=Staphylococcus aureus OX=1280 GN=G0X69_04915 PE=4 SV=1	3	506.598	1.5091	0.00072338	78.505	1
350	DKEIQETAEVLSR	13	Unmodified	_DKEIQETAEVLSR_	A0A6B5I265	ATP-dependent Clp protease ATP-binding subunit OS=Staphylococcus aureus OX=1280 GN=G0X69_04915 PE=4 SV=1	2	759.394	1.4887	4.9203e-10	121.99	1
351	DKINEYTGSNNEEK	14	malon(K)	_DK(ma)INEYTGSNNEEK_	X5E0H3	Uncharacterized protein OS=Staphylococcus aureus OX=1280 GN=BN1321_260262 PE=4 SV=1	2	863.874	1.4266	4.1321e-17	141.99	1
352	DKNDDIVHQILTEGLEK	17	Unmodified	_DKNDDIVHQILTEGLEK_	A0A5C8X5L7	Alpha/beta hydrolase (Fragment) OS=Staphylococcus aureus OX=1280 GN=FVP29_12910 PE=4 SV=1	3	656.341	1.0514	3.8978e-14	132.51	1
353	DKNDDIVHQILTEGLEK	17	Unmodified	_DKNDDIVHQILTEGLEK_	A0A5C8X5L7	Alpha/beta hydrolase (Fragment) OS=Staphylococcus aureus OX=1280 GN=FVP29_12910 PE=4 SV=1	4	492.507	-1.7048	0.015502	34.928	1
354	DKPGYAQAIK	10	Unmodified	_DKPGYAQAIK_	W8TSV1	Phosphopentomutase OS=Staphylococcus aureus OX=1280 GN=drm PE=3 SV=1	3	364.201	1.163	0.02155	43.77	1
355	DKQEMLQTIGAK	12	Unmodified	_DKQEMLQTIGAK_	Q8NWC9	Probable glycine dehydrogenase (decarboxylating) subunit 1 OS=Staphylococcus aureus (strain MW2) OX=196620 GN=gcvPA PE=3 SV=1	2	681.358	-3.4791	0.0041623	84.297	1
356	DKQEMLQTIGAK	12	Unmodified	_DKQEMLQTIGAK_	Q8NWC9	Probable glycine dehydrogenase (decarboxylating) subunit 1 OS=Staphylococcus aureus (strain MW2) OX=196620 GN=gcvPA PE=3 SV=1	3	454.575	-0.26708	0.0010315	71.806	1
357	DKVNFVQAEVTK	12	Unmodified	_DKVNFVQAEVTK_	A0A2X2JYX5	NADH dehydrogenase OS=Staphylococcus aureus OX=1280 GN=NCTC7878_00625 PE=4 SV=1	3	459.917	0.75021	0.0003287	84.892	1
358	DKVNFVQAEVTK	12	Unmodified	_DKVNFVQAEVTK_	A0A2X2JYX5	NADH dehydrogenase OS=Staphylococcus aureus OX=1280 GN=NCTC7878_00625 PE=4 SV=1	2	689.372	0.17381	9.0212e-29	186.56	1
359	DLAEHPNVVR	10	Unmodified	_DLAEHPNVVR_	Q6GDJ7	Fructose-bisphosphate aldolase class 1 OS=Staphylococcus aureus (strain MRSA252) OX=282458 GN=fda PE=3 SV=3	2	575.304	-1.9979	0.021192	57.785	1
360	DLAEHPNVVR	10	Unmodified	_DLAEHPNVVR_	Q6GDJ7	Fructose-bisphosphate aldolase class 1 OS=Staphylococcus aureus (strain MRSA252) OX=282458 GN=fda PE=3 SV=3	3	383.872	-3.189	0.025983	28.958	1
361	DLATVEQKPK	10	Unmodified	_DLATVEQKPK_	A0A2S6DJE9	Translation initiation factor IF-3 OS=Staphylococcus aureus OX=1280 GN=infC PE=3 SV=1	3	376.88		0.0028393	58.699	1
362	DLELQDVDIETPVTK	15	Unmodified	_DLELQDVDIETPVTK_	W8U942	Uracil phosphoribosyltransferase OS=Staphylococcus aureus OX=1280 GN=upp PE=3 SV=1	2	857.941	2.4092	2.1559e-07	111.64	1
363	DLETIVGVQTEK	12	Unmodified	_DLETIVGVQTEK_	W8TSM8	Formate C-acetyltransferase OS=Staphylococcus aureus OX=1280 GN=pflB PE=4 SV=1	2	666.356	0.60148	0.0012085	84.365	1
364	DLKSNLDVIFNAEDDAGK	18	malon(K)	_DLK(ma)SNLDVIFNAEDDAGK_	A0A033UX65	Uncharacterized protein OS=Staphylococcus aureus C0673 OX=1413510 GN=V070_01487 PE=3 SV=1	2	1025.48	1.6318	0.028468	44.391	1
365	DLSNAGAHVVDESVVVDNNIVTSR	24	Unmodified	_DLSNAGAHVVDESVVVDNNIVTSR_	A0A6B1RUV9	DJ-1/PfpI/YhbO family deglycase/protease OS=Staphylococcus aureus OX=1280 GN=GAY51_10320 PE=4 SV=1	3	837.421	1.808	1.5767e-12	103.03	1
366	DLTAPTAVKPTTSAAK	16	Unmodified	_DLTAPTAVKPTTSAAK_	A0A142G9F0	N-acetylmuramoyl-L-alanine amidase OS=Staphylococcus aureus OX=1280 GN=atl PE=4 SV=1	3	524.626	1.9615	0.0014899	63.682	1
367	DNEALSTGVNIYQGQVTNQGLATSHDLDYK	30	Unmodified	_DNEALSTGVNIYQGQVTNQGLATSHDLDYK_	Q6GGW9	Alanine dehydrogenase 1 OS=Staphylococcus aureus (strain MRSA252) OX=282458 GN=ald1 PE=3 SV=1	3	1084.52	0.76685	2.5083e-09	67.911	1
368	DNFNSIASHHDNAK	14	Unmodified	_DNFNSIASHHDNAK_	A0A6B1RF37	Nitric oxide dioxygenase OS=Staphylococcus aureus OX=1280 GN=GAY51_02405 PE=4 SV=1	3	523.906	-0.18861	7.7453e-08	112.42	1
369	DNFNSIASHHDNAK	14	Unmodified	_DNFNSIASHHDNAK_	A0A6B1RF37	Nitric oxide dioxygenase OS=Staphylococcus aureus OX=1280 GN=GAY51_02405 PE=4 SV=1	4	393.181	-0.51621	0.02393	24.954	1
370	DPDFDQFPK	9	Unmodified	_DPDFDQFPK_	X5E2H8	1,4-dihydroxy-2-naphthoyl-CoA synthase OS=Staphylococcus aureus OX=1280 GN=menB PE=3 SV=1	2	554.751	-1.4317	3.6852e-08	156.18	1
371	DPETLKAVEYFAK	13	malon(K)	_DPETLK(ma)AVEYFAK_	W8U942	Uracil phosphoribosyltransferase OS=Staphylococcus aureus OX=1280 GN=upp PE=3 SV=1	2	798.893	-0.035482	0.012812	63.682	1
372	DPNFTSEENMFK	12	Oxidation (M)	_DPNFTSEENM(ox)FK_	Q2YX14	Probable quinol oxidase subunit 2 OS=Staphylococcus aureus (strain bovine RF122 / ET3-1) OX=273036 GN=qoxA PE=3 SV=1	2	737.811	0.31265	0.00018341	92.856	1
373	DPNFTSEENMFK	12	Unmodified	_DPNFTSEENMFK_	Q2YX14	Probable quinol oxidase subunit 2 OS=Staphylococcus aureus (strain bovine RF122 / ET3-1) OX=273036 GN=qoxA PE=3 SV=1	2	729.814	-3.001	2.4257e-15	118.61	1
374	DPNFTSEENMFKDVSEKPLIPAR	23	malon(K)	_DPNFTSEENMFK(ma)DVSEKPLIPAR_	Q2YX14	Probable quinol oxidase subunit 2 OS=Staphylococcus aureus (strain bovine RF122 / ET3-1) OX=273036 GN=qoxA PE=3 SV=1	3	917.437	-0.90144	4.1581e-18	121.46	1
375	DQDAQKDAFDKLK	13	Deamidation (NQ),2 malon(K)	_DQDAQ(de)K(ma)DAFDK(ma)LK_	A0A6B5BYF4	DUF488 domain-containing protein OS=Staphylococcus aureus OX=1280 GN=G0V76_01435 PE=4 SV=1	2	847.873	2.8073	0.020019	45.28	1
376	DQLFVMFGIMHEAK	14	Oxidation (M),Deamidation (NQ)	_DQ(de)LFVM(ox)FGIMHEAK_	A0A077VXG9	UPF0637 protein ERS140147_01275 OS=Staphylococcus aureus OX=1280 GN=ERS140147_01275 PE=3 SV=1	2	841.899	1.7586	0.020614	45.28	1
377	DSDDLDGLNYLAGK	14	Unmodified	_DSDDLDGLNYLAGK_	A0A5C8X3S3	Glucose-6-phosphate isomerase (Fragment) OS=Staphylococcus aureus OX=1280 GN=FVP29_16385 PE=3 SV=1	2	748.349	1.5489	2.6554e-05	105.95	1
378	DSNYTSVK	8	Unmodified	_DSNYTSVK_	A0A6B5L9I5	Molybdate ABC transporter substrate-binding protein (Fragment) OS=Staphylococcus aureus OX=1280 GN=modA PE=4 SV=1	2	457.217	2.2532	0.027794	66.692	1
379	DSTIFLHCLPAFHDTNTLYGQEIYEK	26	Unmodified	_DSTIFLHCLPAFHDTNTLYGQEIYEK_	Q8NUK8	Ornithine carbamoyltransferase, catabolic OS=Staphylococcus aureus (strain MW2) OX=196620 GN=arcB PE=3 SV=1	4	778.873	1.4702	4.6214e-20	114.92	1
380	DSYIAEIDASDAEK	14	Unmodified	_DSYIAEIDASDAEK_	A0A6B5B7N3	Glutamine--fructose-6-phosphate transaminase (Isomerizing) OS=Staphylococcus aureus OX=1280 GN=glmS PE=4 SV=1	2	763.846	1.608	0.0031166	77.372	1
381	DTDRDNFLTAEEAK	14	Unmodified	_DTDRDNFLTAEEAK_	T1Y764	ATP-dependent Clp protease proteolytic subunit OS=Staphylococcus aureus subsp. aureus CN1 OX=1193576 GN=clpP PE=3 SV=1	2	812.876	0.91604	0.00014709	104.95	1
382	DTDSALQENEELFK	14	Unmodified	_DTDSALQENEELFK_	A0A380EFL0	Scaffold protein sufB OS=Staphylococcus aureus OX=1280 GN=NCTC10702_01397 PE=4 SV=1	2	819.878	1.3051	1.3618e-23	162.93	1
383	DTEGMSPAK	9	Unmodified	_DTEGMSPAK_	W5TZ48	Neomycin phosphotransferase III (Fragment) OS=Staphylococcus aureus OX=1280 PE=4 SV=1	2	468.211	-2.9016	0.020137	63.216	1
384	DVAMHIAAINPKYVSSEQVSEEEINHER	28	Deamidation (NQ)	_DVAMHIAAIN(de)PKYVSSEQVSEEEINHER_	A0A6B1RWP0	Elongation factor Ts OS=Staphylococcus aureus OX=1280 GN=GAY51_11945 PE=4 SV=1	4	799.886	-1.6246	4.3811e-09	78.128	1
385	DVDPVAEVMK	10	Unmodified	_DVDPVAEVMK_	A0A6B1RIE9	Alcohol dehydrogenase AdhP OS=Staphylococcus aureus OX=1280 GN=adhP PE=4 SV=1	2	551.776	-0.84532	0.014571	63.624	1
386	DVKPIYLNGEEGNK	14	Unmodified	_DVKPIYLNGEEGNK_	W8TNQ9	ABC superfamily ATP binding cassette transporter, binding protein OS=Staphylococcus aureus OX=1280 GN=psaA PE=1 SV=1	3	525.939	-1.4887	0.020781	34.444	1
387	DVLPDPIHNSK	11	Unmodified	_DVLPDPIHNSK_	T1Y6H5	30S ribosomal protein S7 OS=Staphylococcus aureus subsp. aureus CN1 OX=1193576 GN=rpsG PE=3 SV=1	3	412.219	-0.40654	0.013481	42.843	1
388	DVLPDPIHNSK	11	Unmodified	_DVLPDPIHNSK_	T1Y6H5	30S ribosomal protein S7 OS=Staphylococcus aureus subsp. aureus CN1 OX=1193576 GN=rpsG PE=3 SV=1	3	412.219	0.27259	0.011829	44.847	1
389	DVQSTLQK	8	Unmodified	_DVQSTLQK_	W8UW00	ATP synthase subunit beta OS=Staphylococcus aureus OX=1280 GN=atpD PE=3 SV=1	2	459.748		0.029209	69.598	1
390	DVTIVKSTPENLAEQIK	17	malon(K)	_DVTIVK(ma)STPENLAEQIK_	A0A0U1ML60	Alanine dehydrogenase OS=Staphylococcus aureus OX=1280 GN=ald PE=3 SV=1	2	986.018	-1.2149	3.5876e-05	97.904	1
391	DVTTEHEGEVSTILHDEIK	19	Unmodified	_DVTTEHEGEVSTILHDEIK_	A0A6B1RF37	Nitric oxide dioxygenase OS=Staphylococcus aureus OX=1280 GN=GAY51_02405 PE=4 SV=1	3	718.018	1.084	1.5369e-06	87.24	1
392	DVVEQQFEVAK	11	Unmodified	_DVVEQQFEVAK_	Q6GDJ7	Fructose-bisphosphate aldolase class 1 OS=Staphylococcus aureus (strain MRSA252) OX=282458 GN=fda PE=3 SV=3	2	646.33	-0.64	6.8664e-07	129.89	1
393	DYADINFTYVGDGR	14	Unmodified	_DYADINFTYVGDGR_	Q8NX44	Ornithine carbamoyltransferase OS=Staphylococcus aureus (strain MW2) OX=196620 GN=argF PE=3 SV=1	2	803.363	3.604	0.00014175	98.943	1
394	DYQAGKDNQK	10	Deamidation (NQ)	_DYQAGKDNQ(de)K_	A0A6B5BAJ1	CamS family sex pheromone protein OS=Staphylococcus aureus OX=1280 GN=G0U67_13985 PE=4 SV=1	2	584.267		0.025095	45.368	1
395	DYQGKPLVCVGILK	14	Unmodified	_DYQGKPLVCVGILK_	A0A0H3K756	Hypoxanthine phosphoribosyltransferase OS=Staphylococcus aureus (strain Newman) OX=426430 GN=hpt PE=3 SV=1	3	530.629	0.36915	0.018205	36.572	1
396	DYQVNQQMFDLTGK	14	Unmodified	_DYQVNQQMFDLTGK_	Q8NUK8	Ornithine carbamoyltransferase, catabolic OS=Staphylococcus aureus (strain MW2) OX=196620 GN=arcB PE=3 SV=1	2	843.893	1.5176	3.6696e-20	156.24	1
397	EAAAGLPEDVK	11	Unmodified	_EAAAGLPEDVK_	A0A0U1N0K7	Glucosamine-6-phosphate deaminase OS=Staphylococcus aureus OX=1280 GN=SAMEA2445518_00033 PE=4 SV=1	2	550.285	2.9276	0.0064605	68.515	1
398	EADHTLLLHAGPEIAVASTK	20	Unmodified	_EADHTLLLHAGPEIAVASTK_	A0A6B5B7N3	Glutamine--fructose-6-phosphate transaminase (Isomerizing) OS=Staphylococcus aureus OX=1280 GN=glmS PE=4 SV=1	4	519.03	2.5271	3.0881e-07	92.096	1
399	EADHTLLLHAGPEIAVASTK	20	Unmodified	_EADHTLLLHAGPEIAVASTK_	A0A6B5B7N3	Glutamine--fructose-6-phosphate transaminase (Isomerizing) OS=Staphylococcus aureus OX=1280 GN=glmS PE=4 SV=1	3	691.704	2.2381	4.5875e-100	235.24	1
400	EAFANVKANEESK	13	malon(K)	_EAFANVK(ma)ANEESK_	A0A0E1X434	UPF0342 protein HMPREF0769_11833 OS=Staphylococcus aureus subsp. aureus MN8 OX=548470 GN=HMPREF0769_11833 PE=3 SV=1	2	761.855	-2.3295	0.0015332	58.98	1
401	EAILTIGEK	9	Unmodified	_EAILTIGEK_	A0A6B1RWP0	Elongation factor Ts OS=Staphylococcus aureus OX=1280 GN=GAY51_11945 PE=4 SV=1	2	487.282	-0.82127	0.0087186	76.228	1
402	EASVSHVEIER	11	Unmodified	_EASVSHVEIER_	T1YAQ4	30S ribosomal protein S3 OS=Staphylococcus aureus subsp. aureus CN1 OX=1193576 GN=rpsC PE=3 SV=1	3	419.214	-0.20713	0.012811	43.613	1
403	EATVDAEAQHDAEQQVAEAHVEASK	25	Unmodified	_EATVDAEAQHDAEQQVAEAHVEASK_	A0A6B5UMM0	Uncharacterized protein OS=Staphylococcus aureus OX=1280 GN=G0X47_00400 PE=4 SV=1	4	666.56	-1.2719	0.024729	20.482	1
404	EAVVNDETPGNAIHTEVIDSEENDEDGR	28	Unmodified	_EAVVNDETPGNAIHTEVIDSEENDEDGR_	A0A6B5I2R8	DNA gyrase subunit A OS=Staphylococcus aureus OX=1280 GN=gyrA PE=4 SV=1	3	1018.79	-0.52842	3.3444e-16	100.7	1
405	EAYANEGPTLK	11	Unmodified	_EAYANEGPTLK_	T1YBB3	50S ribosomal protein L22 OS=Staphylococcus aureus subsp. aureus CN1 OX=1193576 GN=rplV PE=3 SV=1	2	596.796		0.00013213	77.062	1
406	EDGNGVHVVKPGDTVNDIAK	20	Unmodified	_EDGNGVHVVKPGDTVNDIAK_	A1KE71	Immunoglobulin G binding protein A (Fragment) OS=Staphylococcus aureus OX=1280 GN=spa PE=4 SV=1	3	688.683	0.48226	8.2811e-28	149.53	1
407	EDGNGVHVVKPGDTVNDIAK	20	Unmodified	_EDGNGVHVVKPGDTVNDIAK_	A1KE71	Immunoglobulin G binding protein A (Fragment) OS=Staphylococcus aureus OX=1280 GN=spa PE=4 SV=1	4	516.764	0.59707	0.0042841	42.529	1
408	EDNNKPGKDDGNKPGK	16	Unmodified	_EDNNKPGKDDGNKPGK_	A0A380DMM8	Immunoglobulin G binding protein A OS=Staphylococcus aureus OX=1280 GN=spa_2 PE=4 SV=1	2	856.914		0.02328	21.314	1
409	EEGVEVLYLEK	11	Unmodified	_EEGVEVLYLEK_	T1YD05	Arginine deiminase OS=Staphylococcus aureus subsp. aureus CN1 OX=1193576 GN=arcA PE=3 SV=1	2	654.34	-0.21867	0.017789	57.175	1
410	EEHGYFEPQQFENPANPEVHELTTGPELLQQFEGK	35	Unmodified	_EEHGYFEPQQFENPANPEVHELTTGPELLQQFEGK_	W8TRW6	Cysteine synthase OS=Staphylococcus aureus OX=1280 GN=cysK PE=3 SV=1	4	1017.98	0.97891	9.5042e-31	114.76	1
411	EEIGLSTGLPLVLHGGTGIPTK	22	Unmodified	_EEIGLSTGLPLVLHGGTGIPTK_	A0A6D1RT20	Fructose-bisphosphate aldolase OS=Staphylococcus aureus OX=1280 GN=fba PE=4 SV=1	3	730.411	-1.2675	4.659e-06	71.853	1
412	EELNYLK	7	Unmodified	_EELNYLK_	A0A380EKQ6	Elongation factor P OS=Staphylococcus aureus OX=1280 GN=efp PE=3 SV=1	2	454.74	2.3966	0.025456	86.866	1
413	EELNYLK	7	Unmodified	_EELNYLK_	A0A380EKQ6	Elongation factor P OS=Staphylococcus aureus OX=1280 GN=efp PE=3 SV=1	2	454.74	-0.19157	0.025508	90.986	1
414	EELSEQYR	8	Unmodified	_EELSEQYR_	W8TSM8	Formate C-acetyltransferase OS=Staphylococcus aureus OX=1280 GN=pflB PE=4 SV=1	2	527.246	0.68922	0.01101	116.73	1
415	EENFADEVKGQMK	13	malon(K)	_EENFADEVK(ma)GQMK_	A0A6B1RWP0	Elongation factor Ts OS=Staphylococcus aureus OX=1280 GN=GAY51_11945 PE=4 SV=1	2	805.854	-1.4247	0.021076	56.514	1
416	EEQDTFAVNSQQK	13	Unmodified	_EEQDTFAVNSQQK_	T1Y5Z1	Acetyl-CoA acetyltransferase OS=Staphylococcus aureus subsp. aureus CN1 OX=1193576 GN=SAKOR_00351 PE=3 SV=1	2	762.352	0.6145	0.0012603	86.803	1
417	EEVPEEEYTIDIGK	14	Unmodified	_EEVPEEEYTIDIGK_	W8TZY6	2-oxoisovalerate dehydrogenase OS=Staphylococcus aureus OX=1280 GN=pdhB PE=4 SV=1	2	825.891	1.7599	0.00020223	95.264	1
418	EEYSVTLDDIDLEK	14	Unmodified	_EEYSVTLDDIDLEK_	A0A6B1RLY3	Class 1b ribonucleoside-diphosphate reductase subunit alpha OS=Staphylococcus aureus OX=1280 GN=nrdE PE=4 SV=1	2	834.896	-0.21817	0.0036831	73.834	1
419	EFNPIIENALDTTTK	15	Unmodified	_EFNPIIENALDTTTK_	A0A6B0CYY4	Ribonucleotide-diphosphate reductase subunit beta (Fragment) OS=Staphylococcus aureus OX=1280 GN=GO941_11235 PE=4 SV=1	2	853.436		2.952e-11	89.484	1
420	EFTAPLITNDGVTIAK	16	Unmodified	_EFTAPLITNDGVTIAK_	A0A6B0BQA0	Chaperonin GroEL (Fragment) OS=Staphylococcus aureus OX=1280 GN=groL PE=4 SV=1	2	845.457	1.286	0.012823	53.565	1
421	EGHYTSFIDK	10	Unmodified	_EGHYTSFIDK_	A0A380DMD2	L-threonine 3-dehydrogenase OS=Staphylococcus aureus OX=1280 GN=NCTC6133_00654 PE=4 SV=1	3	399.524	-0.30198	0.027477	26.889	1
422	EGNEGLLTVTVPAEK	15	Unmodified	_EGNEGLLTVTVPAEK_	T1YA45	Trigger factor OS=Staphylococcus aureus subsp. aureus CN1 OX=1193576 GN=tig PE=3 SV=1	2	778.912	-0.44989	0.0028399	73.593	1
423	EHANIGTIGHVDHGK	15	Unmodified	_EHANIGTIGHVDHGK_	W8TRT9	Elongation factor Tu OS=Staphylococcus aureus OX=1280 GN=tufA PE=3 SV=1	4	396.952	-1.0609	0.00023441	85.837	1
424	EHANIGTIGHVDHGK	15	Unmodified	_EHANIGTIGHVDHGK_	W8TRT9	Elongation factor Tu OS=Staphylococcus aureus OX=1280 GN=tufA PE=3 SV=1	3	528.934	-1.0423	1.051e-08	118.52	1
425	EHANIGTIGHVDHGK	15	Unmodified	_EHANIGTIGHVDHGK_	W8TRT9	Elongation factor Tu OS=Staphylococcus aureus OX=1280 GN=tufA PE=3 SV=1	4	396.952	-1.7207	0.00051638	76.728	1
426	EHANIGTIGHVDHGK	15	Unmodified	_EHANIGTIGHVDHGK_	W8TRT9	Elongation factor Tu OS=Staphylococcus aureus OX=1280 GN=tufA PE=3 SV=1	2	792.898	-2.3783	6.2673e-47	205.66	1
427	EHANIGTIGHVDHGK	15	Unmodified	_EHANIGTIGHVDHGK_	W8TRT9	Elongation factor Tu OS=Staphylococcus aureus OX=1280 GN=tufA PE=3 SV=1	3	528.934	-2.1668	1.7864e-18	143.81	1
428	EHDHFAQVLR	10	Unmodified	_EHDHFAQVLR_	T1YD05	Arginine deiminase OS=Staphylococcus aureus subsp. aureus CN1 OX=1193576 GN=arcA PE=3 SV=1	3	417.879	0.84187	0.0015736	74.173	1
429	EHDHFAQVLR	10	Unmodified	_EHDHFAQVLR_	T1YD05	Arginine deiminase OS=Staphylococcus aureus subsp. aureus CN1 OX=1193576 GN=arcA PE=3 SV=1	2	626.315	-1.0746	0.0049631	77.662	1
430	EIANQVLDTK	10	Unmodified	_EIANQVLDTK_	A0A6B1RWP0	Elongation factor Ts OS=Staphylococcus aureus OX=1280 GN=GAY51_11945 PE=4 SV=1	2	565.806	-0.40238	0.0072095	71.03	1
431	EIAYELNLK	9	Deamidation (NQ)	_EIAYELN(de)LK_	A0A033UR30	Uncharacterized protein OS=Staphylococcus aureus C0673 OX=1413510 GN=V070_01990 PE=4 SV=1	3	365.197	0.10806	0.017118	50.04	1
432	EIDIPASK	8	Unmodified	_EIDIPASK_	W8U5T9	DNA-binding protein OS=Staphylococcus aureus OX=1280 GN=hu PE=3 SV=1	2	436.74	0.27393	0.030307	64.42	1
433	EIKFIGGVVNDPHKPVVAILGGAK	24	malon(K)	_EIK(ma)FIGGVVNDPHKPVVAILGGAK_	A0A6C1EUG3	Phosphoglycerate kinase OS=Staphylococcus aureus OX=1280 GN=GZ067_05860 PE=4 SV=1	4	636.86	0.43512	2.7874e-05	64.589	1
434	EIKKAIDNIKETK	13	Unmodified	_EIKKAIDNIKETK_	A0A0U1MFQ4	Uncharacterized protein OS=Staphylococcus aureus OX=1280 GN=SAMEA2445518_01541 PE=4 SV=1	2	765.449		0.031698	2.9683	1
435	EISSCSNCTDFQAR	14	Unmodified	_EISSCSNCTDFQAR_	A0A0U1MFX6	Serine--tRNA ligase OS=Staphylococcus aureus OX=1280 GN=serS PE=3 SV=1	2	837.846	0.16923	7.9225e-17	134.68	1
436	EISVPVGDETLGR	13	Unmodified	_EISVPVGDETLGR_	W8UW00	ATP synthase subunit beta OS=Staphylococcus aureus OX=1280 GN=atpD PE=3 SV=1	2	686.359	1.0457	0.02715	48.527	1
437	EISYIQAEGFAGGELK	16	Unmodified	_EISYIQAEGFAGGELK_	A0A6B5B7N3	Glutamine--fructose-6-phosphate transaminase (Isomerizing) OS=Staphylococcus aureus OX=1280 GN=glmS PE=4 SV=1	2	856.431	-2.2465	0.0035489	67.646	1
438	EITEAVTEGVPTYVSVFAGR	20	Unmodified	_EITEAVTEGVPTYVSVFAGR_	A0A380ELR3	Transaldolase OS=Staphylococcus aureus OX=1280 GN=tal PE=4 SV=1	3	709.032	0.75977	0.0024319	45.916	1
439	EKAEAVVEEIK	11	Unmodified	_EKAEAVVEEIK_	A0A5C8X7Q8	SDR family NAD(P)-dependent oxidoreductase (Fragment) OS=Staphylococcus aureus OX=1280 GN=FVP29_09105 PE=4 SV=1	3	415.563	1.1384	0.0042481	60	1
440	EKAGILFEELAHNK	14	Deamidation (NQ),malon(K)	_EK(ma)AGILFEELAHN(de)K_	A0A0H3K384	Uncharacterized protein OS=Staphylococcus aureus (strain MW2) OX=196620 GN=MW1437 PE=4 SV=1	2	843.423	0.17789	0.020252	63.181	1
441	ELANISAGR	9	Unmodified	_ELANISAGR_	A0A5C8X9A9	Ribosome recycling factor (Fragment) OS=Staphylococcus aureus OX=1280 GN=FVP29_06260 PE=3 SV=1	2	465.754		0.021463	46.334	1
442	ELEEETGYIAK	11	Unmodified	_ELEEETGYIAK_	A0A0U1MLN5	ADP-ribose pyrophosphatase OS=Staphylococcus aureus OX=1280 GN=nudF PE=4 SV=1	2	641.314		0.014616	47.844	1
443	ELFHETDEEINKK	13	Unmodified	_ELFHETDEEINKK_	A0A6B1RNF5	Triose-phosphate isomerase OS=Staphylococcus aureus OX=1280 GN=GAY51_03870 PE=4 SV=1	3	544.602	0.15131	3.9057e-12	136.01	1
444	ELFHETDEEINKK	13	Unmodified	_ELFHETDEEINKK_	A0A6B1RNF5	Triose-phosphate isomerase OS=Staphylococcus aureus OX=1280 GN=GAY51_03870 PE=4 SV=1	2	816.399	-0.01746	3.3072e-07	113.24	1
445	ELFSNDEYK	9	Unmodified	_ELFSNDEYK_	W8TVM8	Threonine--tRNA ligase OS=Staphylococcus aureus OX=1280 GN=thrS PE=3 SV=1	2	572.761	0.11073	0.0050429	83.998	1
446	ELGADAIINSK	11	Unmodified	_ELGADAIINSK_	A0A6B1RIE9	Alcohol dehydrogenase AdhP OS=Staphylococcus aureus OX=1280 GN=adhP PE=4 SV=1	2	565.806	1.4822	0.0026963	80.245	1
447	ELGKEPNK	8	Unmodified	_ELGKEPNK_	A0A2S6DJ97	Molecular chaperone DnaK (Fragment) OS=Staphylococcus aureus OX=1280 GN=dnaK PE=4 SV=1	2	457.751	-0.6552	0.0097498	81.119	1
448	ELIGEIKDPIIDVPLK	16	Unmodified	_ELIGEIKDPIIDVPLK_	A0A6B5T8X8	P-loop NTPase OS=Staphylococcus aureus OX=1280 GN=G0Z16_09105 PE=4 SV=1	3	598.02	2.2345	0.0014901	63.681	1
449	ELLGMSHEDIAQTFK	15	Unmodified	_ELLGMSHEDIAQTFK_	A0A6B0BDT6	NADP-dependent phosphogluconate dehydrogenase (Fragment) OS=Staphylococcus aureus OX=1280 GN=gndA PE=4 SV=1	3	573.619	1.9005	0.010773	40.941	1
450	ELNPTDELLNR	11	Unmodified	_ELNPTDELLNR_	Q8NX44	Ornithine carbamoyltransferase OS=Staphylococcus aureus (strain MW2) OX=196620 GN=argF PE=3 SV=1	2	657.338	-0.36798	6.8521e-08	141.88	1
451	ELNPTDELLNR	11	Unmodified	_ELNPTDELLNR_	Q8NX44	Ornithine carbamoyltransferase OS=Staphylococcus aureus (strain MW2) OX=196620 GN=argF PE=3 SV=1	2	657.338	-0.63872	0.00056545	92.866	1
452	ELNTLLQK	8	Unmodified	_ELNTLLQK_	A0A6B0CMV4	GTP-sensing pleiotropic transcriptional regulator CodY (Fragment) OS=Staphylococcus aureus OX=1280 GN=codY PE=4 SV=1	2	479.782	-0.094305	0.01977	75.109	1
453	EMEEIGLSTGLPLVLHGGTGIPTK	24	Oxidation (M)	_EM(ox)EEIGLSTGLPLVLHGGTGIPTK_	A0A6B0BAU5	Ketose-bisphosphate aldolase (Fragment) OS=Staphylococcus aureus OX=1280 GN=GO793_02780 PE=4 SV=1	3	822.437	2.231	7.1977e-12	95.926	1
454	EMEEIGLSTGLPLVLHGGTGIPTK	24	Unmodified	_EMEEIGLSTGLPLVLHGGTGIPTK_	A0A6B0BAU5	Ketose-bisphosphate aldolase (Fragment) OS=Staphylococcus aureus OX=1280 GN=GO793_02780 PE=4 SV=1	3	817.105	-1.1315	3.2506e-13	106.63	1
455	EMEVTDEVFESK	12	Oxidation (M)	_EM(ox)EVTDEVFESK_	Q8NX44	Ornithine carbamoyltransferase OS=Staphylococcus aureus (strain MW2) OX=196620 GN=argF PE=3 SV=1	2	729.819	0.72182	7.7748e-05	96.82	1
456	EMEVTDEVFESK	12	Unmodified	_EMEVTDEVFESK_	Q8NX44	Ornithine carbamoyltransferase OS=Staphylococcus aureus (strain MW2) OX=196620 GN=argF PE=3 SV=1	2	721.821	-2.6544	8.6867e-09	140.14	1
457	EMSVLELNDLVK	12	Oxidation (M)	_EM(ox)SVLELNDLVK_	T1Y5Y2	50S ribosomal protein L7/L12 OS=Staphylococcus aureus subsp. aureus CN1 OX=1193576 GN=rplL PE=3 SV=1	2	703.366	1.53	0.0011551	77.185	1
458	ENADDVIAEMR	11	Oxidation (M)	_ENADDVIAEM(ox)R_	A0A0U1MFX6	Serine--tRNA ligase OS=Staphylococcus aureus OX=1280 GN=serS PE=3 SV=1	2	639.785	1.4364	0.0079538	57.792	1
459	ENADDVIAEMR	11	Unmodified	_ENADDVIAEMR_	A0A0U1MFX6	Serine--tRNA ligase OS=Staphylococcus aureus OX=1280 GN=serS PE=3 SV=1	2	631.788	-0.44459	0.0028791	79.492	1
460	ENGMTIVHPYDDK	13	Unmodified	_ENGMTIVHPYDDK_	A0A658B9J9	L-threonine dehydratase catabolic TdcB OS=Staphylococcus aureus OX=1280 GN=DDL17_15820 PE=3 SV=1	3	506.901	2.4653	0.010611	42.785	1
461	ENGVDLSQDK	10	Unmodified	_ENGVDLSQDK_	A0A6B5UN24	Molecular chaperone DnaK OS=Staphylococcus aureus OX=1280 GN=dnaK PE=4 SV=1	2	552.762	6.772e-05	0.013103	64.918	1
462	ENIGEPMHRIFK	12	Oxidation (M)	_ENIGEPM(ox)HRIFK_	A0A0U1MFL3	Capsular polysaccharide synthesis enzyme Cap8P OS=Staphylococcus aureus OX=1280 GN=mnaA_1 PE=3 SV=1	2	743.877	1.6307	0.0086941	61.344	1
463	ENLAEVLDK	9	Unmodified	_ENLAEVLDK_	A0A2X2JXN0	Thioredoxin OS=Staphylococcus aureus OX=1280 GN=trxA_1 PE=4 SV=1	2	515.774	0.82399	0.016649	66.056	1
464	ENLAEVLDKHL	11	Unmodified	_ENLAEVLDKHL_	A0A2X2JXN0	Thioredoxin OS=Staphylococcus aureus OX=1280 GN=trxA_1 PE=4 SV=1	3	427.566	2.1065	0.0038671	61.344	1
465	ENLAEVLDKHL	11	Unmodified	_ENLAEVLDKHL_	A0A2X2JXN0	Thioredoxin OS=Staphylococcus aureus OX=1280 GN=trxA_1 PE=4 SV=1	2	640.846	2.2523	3.4183e-06	127.87	1
466	ENSEHFNVEIAK	12	Unmodified	_ENSEHFNVEIAK_	A0A380DR62	Putative DUF1447-containing protein OS=Staphylococcus aureus OX=1280 GN=NCTC6133_01312 PE=4 SV=1	3	472.897	2.2887	0.00025042	64.827	1
467	ENTYEGVEAVIDK	13	Unmodified	_ENTYEGVEAVIDK_	A0A659FUB0	Carbamate kinase OS=Staphylococcus aureus OX=1280 GN=arcC PE=3 SV=1	2	733.854	1.8997	0.0013861	85.837	1
468	ENTYEGVEAVIDKDFASEK	19	Unmodified	_ENTYEGVEAVIDKDFASEK_	A0A659FUB0	Carbamate kinase OS=Staphylococcus aureus OX=1280 GN=arcC PE=3 SV=1	3	715.339	-0.63996	4.0127e-07	93.371	1
469	EPDYLFEEK	9	Unmodified	_EPDYLFEEK_	A0A380E498	SpoIIIE family cell division protein OS=Staphylococcus aureus OX=1280 GN=sftA PE=3 SV=1	2	585.272	0.89437	0.022172	61.56	1
470	EPHESEYQYFK	11	Unmodified	_EPHESEYQYFK_	Q6GGW9	Alanine dehydrogenase 1 OS=Staphylococcus aureus (strain MRSA252) OX=282458 GN=ald1 PE=3 SV=1	2	728.823	-1.5311	0.00023618	95.477	1
471	EPYPNYNR	8	Unmodified	_EPYPNYNR_	A0A6B5EK94	NAD(P)/FAD-dependent oxidoreductase OS=Staphylococcus aureus OX=1280 GN=G0Y82_06660 PE=4 SV=1	2	526.743	-1.7153	0.0197	75.189	1
472	EQEWDDVIDTNLK	13	Unmodified	_EQEWDDVIDTNLK_	A0A5C8X7Q8	SDR family NAD(P)-dependent oxidoreductase (Fragment) OS=Staphylococcus aureus OX=1280 GN=FVP29_09105 PE=4 SV=1	2	802.876		1.0245e-11	101.32	1
473	EQNGAAMSLGR	11	Oxidation (M)	_EQNGAAM(ox)SLGR_	W8TSM8	Formate C-acetyltransferase OS=Staphylococcus aureus OX=1280 GN=pflB PE=4 SV=1	2	575.269	-1.4044	0.0047852	64.64	1
474	EQNGAAMSLGR	11	Unmodified	_EQNGAAMSLGR_	W8TSM8	Formate C-acetyltransferase OS=Staphylococcus aureus OX=1280 GN=pflB PE=4 SV=1	2	567.272	-0.75782	0.0037709	75.819	1
475	EQQLDVISR	9	Unmodified	_EQQLDVISR_	W8TSM8	Formate C-acetyltransferase OS=Staphylococcus aureus OX=1280 GN=pflB PE=4 SV=1	2	544.291	1.3629	0.014407	67.881	1
476	EQVQNHQKK	9	2 Deamidation (NQ)	_EQVQ(de)N(de)HQKK_	A0A1J0HSB3	Uncharacterized protein OS=Staphylococcus aureus OX=1280 GN=G_00007 PE=4 SV=1	2	570.786	1.4202	0.018663	43.083	1
477	EQWNDGSNTLCIR	13	Unmodified	_EQWNDGSNTLCIR_	T1YD05	Arginine deiminase OS=Staphylococcus aureus subsp. aureus CN1 OX=1193576 GN=arcA PE=3 SV=1	2	796.86	-1.8176	4.9155e-11	130.1	1
478	ESGLLGLSGTSSDLR	15	Unmodified	_ESGLLGLSGTSSDLR_	T1Y9R0	Acetate kinase OS=Staphylococcus aureus subsp. aureus CN1 OX=1193576 GN=ackA PE=3 SV=1	2	746.386	2.785	0.018787	50.305	1
480	ESQLTEALFAEKPVAK	16	Unmodified	_ESQLTEALFAEKPVAK_	A0A6B1RTI2	Uncharacterized protein OS=Staphylococcus aureus OX=1280 GN=GAY51_06375 PE=4 SV=1	3	587.652		0.015408	28.549	1
481	ETAGHIIHELKDEK	14	malon(K)	_ETAGHIIHELK(ma)DEK_	A0A6B0B8B7	Helix-turn-helix domain-containing protein (Fragment) OS=Staphylococcus aureus OX=1280 GN=GO793_00445 PE=4 SV=1	3	569.285	0.90621	0.0051518	56.424	1
482	ETGGLPDAEK	10	Unmodified	_ETGGLPDAEK_	A0A6D2GXJ7	ATP synthase F0F1 subunit alpha OS=Staphylococcus aureus OX=1280 GN=atpA PE=4 SV=1	2	508.748	0.41898	0.028783	54.486	1
483	ETLIDAMEHPEEYPQLTIR	19	Unmodified	_ETLIDAMEHPEEYPQLTIR_	W8TSM8	Formate C-acetyltransferase OS=Staphylococcus aureus OX=1280 GN=pflB PE=4 SV=1	3	762.375	-1.5528	5.0941e-05	77.08	1
484	ETPVEVEFDQIEK	13	Unmodified	_ETPVEVEFDQIEK_	A0A380DL47	Transcription termination/antitermination protein NusG OS=Staphylococcus aureus OX=1280 GN=nusG_1 PE=3 SV=1	2	781.883	0.84517	0.0056644	67.234	1
485	ETQINFQQK	9	Unmodified	_ETQINFQQK_	A0A0E1X434	UPF0342 protein HMPREF0769_11833 OS=Staphylococcus aureus subsp. aureus MN8 OX=548470 GN=HMPREF0769_11833 PE=3 SV=1	2	568.291	0.064327	0.0011615	104.06	1
486	ETQINFQQKQMQGEEITEEDLQK	23	malon(K)	_ETQINFQQK(ma)QMQGEEITEEDLQK_	A0A0E1X434	UPF0342 protein HMPREF0769_11833 OS=Staphylococcus aureus subsp. aureus MN8 OX=548470 GN=HMPREF0769_11833 PE=3 SV=1	3	960.778	-2.7168	2.2601e-08	82.635	1
487	EVIENIKPTVLIGTSTQTGAFTEDAVK	27	Unmodified	_EVIENIKPTVLIGTSTQTGAFTEDAVK_	A0A6B5T592	NAD-dependent malic enzyme OS=Staphylococcus aureus OX=1280 GN=G0Z16_05940 PE=4 SV=1	3	954.51	1.407	8.6703e-20	107.65	1
488	EVLLTEEDIQNICK	14	Unmodified	_EVLLTEEDIQNICK_	W8U1F7	Hypoxanthine phosphoribosyltransferase OS=Staphylococcus aureus OX=1280 GN=hpt PE=3 SV=1	2	852.43	1.7845	0.012759	54.898	1
489	EVSMGYDHVYTPVLANVDLYK	21	Oxidation (M)	_EVSM(ox)GYDHVYTPVLANVDLYK_	W8TVM8	Threonine--tRNA ligase OS=Staphylococcus aureus OX=1280 GN=thrS PE=3 SV=1	3	810.395	1.6748	4.1917e-07	89.011	1
490	EVSMGYDHVYTPVLANVDLYK	21	Oxidation (M)	_EVSM(ox)GYDHVYTPVLANVDLYK_	W8TVM8	Threonine--tRNA ligase OS=Staphylococcus aureus OX=1280 GN=thrS PE=3 SV=1	3	810.395	0.86518	0.0061665	41.615	1
491	EVSMGYDHVYTPVLANVDLYK	21	Unmodified	_EVSMGYDHVYTPVLANVDLYK_	W8TVM8	Threonine--tRNA ligase OS=Staphylococcus aureus OX=1280 GN=thrS PE=3 SV=1	3	805.063	0.38856	2.5905e-09	104.84	1
492	EVVEKLYQENGK	12	Deamidation (NQ),malon(K)	_EVVEK(ma)LYQEN(de)GK_	A0A0U1N0K7	Glucosamine-6-phosphate deaminase OS=Staphylococcus aureus OX=1280 GN=SAMEA2445518_00033 PE=4 SV=1	2	761.867	3.1464	0.0020597	89.805	1
493	EVVEKLYQENGK	12	malon(K)	_EVVEK(ma)LYQENGK_	A0A0U1N0K7	Glucosamine-6-phosphate deaminase OS=Staphylococcus aureus OX=1280 GN=SAMEA2445518_00033 PE=4 SV=1	2	761.375	-2.5694	5.4088e-08	131.83	1
494	EYAIVNLDQLNK	12	Unmodified	_EYAIVNLDQLNK_	T1YCD9	50S ribosomal protein L15 OS=Staphylococcus aureus subsp. aureus CN1 OX=1193576 GN=rplO PE=3 SV=1	2	710.378	-0.070639	0.00078388	88.803	1
495	EYGLIDEVMVPETK	14	Unmodified	_EYGLIDEVMVPETK_	T1Y764	ATP-dependent Clp protease proteolytic subunit OS=Staphylococcus aureus subsp. aureus CN1 OX=1193576 GN=clpP PE=3 SV=1	2	811.903	1.9892	0.0025059	81.185	1
496	EYPNIEIVAIEPEASPVLSGGEPGPHK	27	Unmodified	_EYPNIEIVAIEPEASPVLSGGEPGPHK_	W8TRW6	Cysteine synthase OS=Staphylococcus aureus OX=1280 GN=cysK PE=3 SV=1	3	943.815	-1.9284	1.0409e-15	99.219	1
497	FAEEENVR	8	Unmodified	_FAEEENVR_	A0A659IAS8	Type I glutamate--ammonia ligase OS=Staphylococcus aureus OX=1280 GN=glnA PE=3 SV=1	2	497.235		0.030015	50.04	1
498	FAEGSMLPK	9	Oxidation (M)	_FAEGSM(ox)LPK_	A0A659FUB0	Carbamate kinase OS=Staphylococcus aureus OX=1280 GN=arcC PE=3 SV=1	2	498.247	2.0214	0.026275	46.462	1
499	FAGFGGSSDGQDYETIR	17	Unmodified	_FAGFGGSSDGQDYETIR_	A0A6B0A7W0	AAA domain-containing protein OS=Staphylococcus aureus OX=1280 GN=GO651_14495 PE=4 SV=1	2	903.9	0.35146	0.00016811	88.385	1
500	FAGSYHGHSDLVLVAAGSGPSQLGSPDSAGVPESVAR	37	Unmodified	_FAGSYHGHSDLVLVAAGSGPSQLGSPDSAGVPESVAR_	X5E188	Glutamate-1-semialdehyde 2,1-aminomutase OS=Staphylococcus aureus OX=1280 GN=gsaB PE=3 SV=1	4	895.692	-1.9801	0.016433	21.01	1
501	FANEIQQYGFEVK	13	Unmodified	_FANEIQQYGFEVK_	W8TSP0	Dipeptidase PepV OS=Staphylococcus aureus OX=1280 GN=sapep PE=4 SV=1	2	786.888	0.41576	1.6894e-18	164.53	1
502	FANYAASK	8	Unmodified	_FANYAASK_	A0A2X2JYX5	NADH dehydrogenase OS=Staphylococcus aureus OX=1280 GN=NCTC7878_00625 PE=4 SV=1	2	436.219		3.5539e-06	104.06	1
503	FANYAASKEK	10	malon(K)	_FANYAASK(ma)EK_	A0A2X2JYX5	NADH dehydrogenase OS=Staphylococcus aureus OX=1280 GN=NCTC7878_00625 PE=4 SV=1	2	607.788	-0.30673	0.0090407	76.073	1
504	FAQLLEEIK	9	Unmodified	_FAQLLEEIK_	A0A2X2JXX4	ESAT-6-like protein OS=Staphylococcus aureus OX=1280 GN=esxA PE=3 SV=1	2	545.811	-2.1738	0.0013883	113.62	1
505	FAQQIADVVQDK	12	Unmodified	_FAQQIADVVQDK_	W8U427	Phosphoglucosamine mutase OS=Staphylococcus aureus OX=1280 GN=glmM PE=3 SV=1	2	681.357	2.1501	0.0036868	71.558	1
506	FDAVVEDVVEK	11	Unmodified	_FDAVVEDVVEK_	A0A6B1RIH8	Preprotein translocase subunit SecA OS=Staphylococcus aureus OX=1280 GN=secA PE=4 SV=1	2	625.319	2.6745	0.027285	53.034	1
507	FDDVQQDIEAVVK	13	Unmodified	_FDDVQQDIEAVVK_	A0A2X2K695	Deoxyribose-phosphate aldolase OS=Staphylococcus aureus OX=1280 GN=dra_2 PE=3 SV=1	2	753.378	0.041568	0.0058119	66.989	1
508	FDENACVIIR	10	Unmodified	_FDENACVIIR_	T1YBA9	50S ribosomal protein L14 OS=Staphylococcus aureus subsp. aureus CN1 OX=1193576 GN=rplN PE=3 SV=1	2	618.806	-0.57155	2.5399e-26	185.61	1
509	FDENACVIIR	10	Unmodified	_FDENACVIIR_	T1YBA9	50S ribosomal protein L14 OS=Staphylococcus aureus subsp. aureus CN1 OX=1193576 GN=rplN PE=3 SV=1	2	618.806		0.0011207	76.228	1
510	FDETTAR	7	Unmodified	_FDETTAR_	A0A5C8X3I0	Heme-dependent peroxidase (Fragment) OS=Staphylococcus aureus OX=1280 GN=FVP29_17130 PE=4 SV=1	2	420.198	1.7069	0.031412	78.178	1
511	FDFTPVGK	8	Unmodified	_FDFTPVGK_	A0A6B5IWQ1	Ribonuclease J (Fragment) OS=Staphylococcus aureus OX=1280 GN=G0Y39_12630 PE=4 SV=1	2	455.737	-2.1068	0.024351	69.825	1
512	FDILDADDEEDQNLK	15	Unmodified	_FDILDADDEEDQNLK_	A0A5C8XAM8	Probable DNA-directed RNA polymerase subunit delta (Fragment) OS=Staphylococcus aureus OX=1280 GN=FVP29_04565 PE=3 SV=1	2	890.4	0.035824	1.4474e-11	123.29	1
513	FDLTYIGQDGEHHR	14	Unmodified	_FDLTYIGQDGEHHR_	W8TVM8	Threonine--tRNA ligase OS=Staphylococcus aureus OX=1280 GN=thrS PE=3 SV=1	3	563.266	-0.50878	0.0056844	49.298	1
514	FDLTYIGQDGEHHR	14	Unmodified	_FDLTYIGQDGEHHR_	W8TVM8	Threonine--tRNA ligase OS=Staphylococcus aureus OX=1280 GN=thrS PE=3 SV=1	4	422.701	-0.40577	0.028724	17.786	1
515	FDLTYIGQDGEHHRPVVIHR	20	Unmodified	_FDLTYIGQDGEHHRPVVIHR_	W8TVM8	Threonine--tRNA ligase OS=Staphylococcus aureus OX=1280 GN=thrS PE=3 SV=1	5	478.649	-0.49967	0.026581	54.103	1
516	FDLTYIGQDGEHHRPVVIHR	20	Unmodified	_FDLTYIGQDGEHHRPVVIHR_	W8TVM8	Threonine--tRNA ligase OS=Staphylococcus aureus OX=1280 GN=thrS PE=3 SV=1	4	598.059	0.43862	6.7269e-11	114.96	1
517	FDLTYIGQDGEHHRPVVIHR	20	Unmodified	_FDLTYIGQDGEHHRPVVIHR_	W8TVM8	Threonine--tRNA ligase OS=Staphylococcus aureus OX=1280 GN=thrS PE=3 SV=1	3	797.077	-1.0718	8.9207e-06	81.157	1
518	FDSDIQLEYNGK	12	Deamidation (NQ)	_FDSDIQLEYN(de)GK_	A0A1Q8DF94	Phosphocarrier protein HPr OS=Staphylococcus aureus OX=1280 GN=BSZ10_04760 PE=4 SV=1	2	715.328	-3.3626	1.6386e-06	125.82	1
519	FDSQPEYK	8	Unmodified	_FDSQPEYK_	A0A5C8X7Z5	Catalase (Fragment) OS=Staphylococcus aureus OX=1280 GN=FVP29_08195 PE=4 SV=1	2	507.232	-0.60783	0.012543	87.696	1
520	FDTAINEFK	9	Unmodified	_FDTAINEFK_	A0A6D2GXJ7	ATP synthase F0F1 subunit alpha OS=Staphylococcus aureus OX=1280 GN=atpA PE=4 SV=1	2	542.769	4.1572	0.0071817	79.148	1
521	FDYSLYELANK	11	Unmodified	_FDYSLYELANK_	W8TVL7	ATP-dependent 6-phosphofructokinase OS=Staphylococcus aureus OX=1280 GN=pfkA PE=3 SV=1	2	681.832	0.35856	0.011498	63.473	1
522	FEAGWCPDCR	10	Unmodified	_FEAGWCPDCR_	A0A3M9DXN1	Thiol reductase thioredoxin OS=Staphylococcus aureus OX=1280 GN=DDL17_07305 PE=4 SV=1	2	649.258	0.61245	0.00016178	108.7	1
523	FEAQLVEK	8	Unmodified	_FEAQLVEK_	Q8NXZ0	Lysine--tRNA ligase OS=Staphylococcus aureus (strain MW2) OX=196620 GN=lysS PE=3 SV=1	2	482.261	0.69841	0.019934	74.92	1
524	FEDGTEVTPALLVESGVVK	19	Unmodified	_FEDGTEVTPALLVESGVVK_	T1YCD9	50S ribosomal protein L15 OS=Staphylococcus aureus subsp. aureus CN1 OX=1193576 GN=rplO PE=3 SV=1	2	995.523	0.49552	1.9376e-06	92.671	2
525	FEDGTEVTPALLVESGVVK	19	Unmodified	_FEDGTEVTPALLVESGVVK_	T1YCD9	50S ribosomal protein L15 OS=Staphylococcus aureus subsp. aureus CN1 OX=1193576 GN=rplO PE=3 SV=1	3	664.017	-0.14607	1.4948e-10	112.82	1
526	FEDGTEVTPALLVETGVVKNEK	22	malon(K)	_FEDGTEVTPALLVETGVVK(ma)NEK_	A0A1Q8DBU8	50S ribosomal protein L15 OS=Staphylococcus aureus OX=1280 GN=rplO PE=3 SV=1	3	821.083	-0.87208	1.8533e-08	88.548	1
527	FEEQFQQLSPK	11	Unmodified	_FEEQFQQLSPK_	A0A2X2JXX4	ESAT-6-like protein OS=Staphylococcus aureus OX=1280 GN=esxA PE=3 SV=1	2	690.843	-1.5091	4.1908e-05	105.46	1
528	FEEQFQQLSPKVEK	14	malon(K)	_FEEQFQQLSPK(ma)VEK_	A0A2X2JXX4	ESAT-6-like protein OS=Staphylococcus aureus OX=1280 GN=esxA PE=3 SV=1	2	911.947	-0.33445	7.0259e-20	155.96	1
529	FEGCYHGHSDSLLIK	15	Unmodified	_FEGCYHGHSDSLLIK_	Q6GG38	Glutamate-1-semialdehyde 2,1-aminomutase 1 OS=Staphylococcus aureus (strain MRSA252) OX=282458 GN=hemL1 PE=3 SV=1	4	441.461	0.10732	0.025228	22.857	1
530	FEGCYHGHSDSLLIK	15	Unmodified	_FEGCYHGHSDSLLIK_	Q6GG38	Glutamate-1-semialdehyde 2,1-aminomutase 1 OS=Staphylococcus aureus (strain MRSA252) OX=282458 GN=hemL1 PE=3 SV=1	3	588.279	-0.42608	0.010773	40.941	1
531	FEIEDDEALLGR	12	Unmodified	_FEIEDDEALLGR_	A0A0D1KDQ6	Uncharacterized protein (Fragment) OS=Staphylococcus aureus subsp. aureus OX=46170 GN=QU38_01370 PE=4 SV=1	2	703.844	1.5471	0.0025198	77.062	1
532	FEIEQQEK	8	Unmodified	_FEIEQQEK_	A0A6B5H121	DNA repair protein Rad50 OS=Staphylococcus aureus OX=1280 GN=G0Z13_13675 PE=4 SV=1	2	525.759	0.19067	0.024578	69.598	1
533	FEIHGDNLTITDAIR	15	Unmodified	_FEIHGDNLTITDAIR_	A0A380EGD5	Ribosomal subunit interface protein OS=Staphylococcus aureus OX=1280 GN=NCTC10702_01266 PE=4 SV=1	3	572.297	1.5452	0.0020837	58.079	1
534	FEINVSKNIKK	11	2 Deamidation (NQ),2 malon(K)	_FEIN(de)VSK(ma)N(de)IK(ma)K_	A0A1Q8DGF6	Uncharacterized protein OS=Staphylococcus aureus OX=1280 GN=BSZ10_02095 PE=4 SV=1	2	747.372	1.8176	0.018446	47.302	1
535	FELGHNGASR	10	Unmodified	_FELGHNGASR_	T1Y9N5	Transketolase OS=Staphylococcus aureus subsp. aureus CN1 OX=1193576 GN=SAKOR_01278 PE=3 SV=1	3	363.181	0.49387	0.02556	29.544	1
536	FELGHNGASR	10	Unmodified	_FELGHNGASR_	T1Y9N5	Transketolase OS=Staphylococcus aureus subsp. aureus CN1 OX=1193576 GN=SAKOR_01278 PE=3 SV=1	2	544.268	0.32713	0.0022362	87.568	1
537	FEMPYEEAK	9	Unmodified	_FEMPYEEAK_	Q2G1U3	Oligoendopeptidase F OS=Staphylococcus aureus (strain NCTC 8325) OX=93061 GN=SAOUHSC_00937 PE=3 SV=1	2	572.255	-1.0812	0.0015508	99.815	1
538	FETHHQVK	8	Unmodified	_FETHHQVK_	A0A6B5I265	ATP-dependent Clp protease ATP-binding subunit OS=Staphylococcus aureus OX=1280 GN=G0X69_04915 PE=4 SV=1	2	513.262		1.4085e-21	132.76	1
539	FETLPEEK	8	Unmodified	_FETLPEEK_	A0A6B5T8X8	P-loop NTPase OS=Staphylococcus aureus OX=1280 GN=G0Z16_09105 PE=4 SV=1	2	496.75	-2.1039	0.012728	86.67	1
540	FFDYTFASVGVKPNELK	17	Unmodified	_FFDYTFASVGVKPNELK_	A0A5C8X8E1	CoA-disulfide reductase (Fragment) OS=Staphylococcus aureus OX=1280 GN=FVP29_07925 PE=4 SV=1	3	654.672	-0.69722	4.7463e-05	88.427	1
541	FGAFVELPEGK	11	Unmodified	_FGAFVELPEGK_	W8TRX1	Polyribonucleotide nucleotidyltransferase OS=Staphylococcus aureus OX=1280 GN=yabR PE=4 SV=1	2	597.314	-1.7684	0.00015299	99.752	1
542	FGAVYQYGDIK	11	Unmodified	_FGAVYQYGDIK_	Q9KX07	Thioredoxin reductase (Fragment) OS=Staphylococcus aureus OX=1280 PE=3 SV=1	2	630.817	0.50562	0.00435	73.435	1
543	FGAVYQYGDIK	11	Unmodified	_FGAVYQYGDIK_	Q9KX07	Thioredoxin reductase (Fragment) OS=Staphylococcus aureus OX=1280 PE=3 SV=1	2	630.817	-1.6654	0.00435	73.435	1
544	FGDADLSPGTR	11	Unmodified	_FGDADLSPGTR_	A0A1Q8DFH2	Lactoylglutathione lyase OS=Staphylococcus aureus OX=1280 GN=BSZ10_04430 PE=4 SV=1	2	568.273	1.0475	0.00010146	102.4	1
545	FGIPSYYVIASSEASSNLSR	20	Unmodified	_FGIPSYYVIASSEASSNLSR_	X5E0B0	Glutamyl-tRNA(Gln) amidotransferase subunit A OS=Staphylococcus aureus OX=1280 GN=gatA PE=3 SV=1	3	716.692	-0.53543	0.003177	43.696	1
546	FGMDSYGHSQLPSDGLK	17	Unmodified	_FGMDSYGHSQLPSDGLK_	Q599I9	RsbU protein OS=Staphylococcus aureus OX=1280 GN=rsbU PE=4 SV=1	3	613.617	3.3594	0.001004	64.454	1
547	FGNPETTPGGR	11	Unmodified	_FGNPETTPGGR_	A0A2X2KDH1	Recombinase A OS=Staphylococcus aureus OX=1280 GN=recA_1 PE=4 SV=1	2	566.773	0.47965	0.016793	58.172	1
548	FGTQYTTR	8	Unmodified	_FGTQYTTR_	A0A6B5EK94	NAD(P)/FAD-dependent oxidoreductase OS=Staphylococcus aureus OX=1280 GN=G0Y82_06660 PE=4 SV=1	2	487.241	-0.41495	0.012182	89.698	1
549	FHGLQDIEQR	10	Unmodified	_FHGLQDIEQR_	Q8NXZ0	Lysine--tRNA ligase OS=Staphylococcus aureus (strain MW2) OX=196620 GN=lysS PE=3 SV=1	3	414.879	0.11538	0.00042797	90.15	1
550	FHGQKIYNYINDR	13	malon(K)	_FHGQK(ma)IYNYINDR_	W8TV52	Ferritin OS=Staphylococcus aureus OX=1280 GN=ftnA PE=3 SV=1	3	585.281		0.012167	48.216	1
551	FHNGINVIGTGQTYTSGIK	19	Deamidation (NQ)	_FHN(de)GINVIGTGQTYTSGIK_	Q6GHQ0	Cell division protein FtsA OS=Staphylococcus aureus (strain MRSA252) OX=282458 GN=ftsA PE=1 SV=1	3	670.009	1.8458	5.1178e-05	78.848	1
552	FHNGINVIGTGQTYTSGIK	19	Deamidation (NQ)	_FHN(de)GINVIGTGQTYTSGIK_	Q6GHQ0	Cell division protein FtsA OS=Staphylococcus aureus (strain MRSA252) OX=282458 GN=ftsA PE=1 SV=1	3	670.009	0.23294	1.1766e-07	94.845	1
553	FHPDVDEEEVK	11	Unmodified	_FHPDVDEEEVK_	W8TMZ7	Glutamate dehydrogenase OS=Staphylococcus aureus OX=1280 GN=gudB PE=3 SV=1	3	448.542	0.2397	0.00064245	81.017	1
554	FIDEVFDIVR	10	Unmodified	_FIDEVFDIVR_	A0A5C8X3W0	Aminopeptidase (Fragment) OS=Staphylococcus aureus OX=1280 GN=FVP29_17010 PE=4 SV=1	2	626.832	-1.1324	0.0033633	82.417	1
555	FIDNELK	7	Unmodified	_FIDNELK_	T1YAQ4	30S ribosomal protein S3 OS=Staphylococcus aureus subsp. aureus CN1 OX=1193576 GN=rpsC PE=3 SV=1	2	439.735	-0.65515	0.023727	97.602	1
556	FIEDFSIK	8	Unmodified	_FIEDFSIK_	A0A5C8X421	Inosine-5'-monophosphate dehydrogenase (Fragment) OS=Staphylococcus aureus OX=1280 GN=guaB PE=3 SV=1	2	499.763	-2.541	0.026099	68.224	1
557	FIEDIDHVNPDEVR	14	Unmodified	_FIEDIDHVNPDEVR_	A0A6B5BTQ0	Uncharacterized protein OS=Staphylococcus aureus OX=1280 GN=G0V17_08000 PE=4 SV=1	3	566.609	0.3767	1.0343e-07	109.83	1
558	FIGGVVNDPHKPVVAILGGAK	21	Unmodified	_FIGGVVNDPHKPVVAILGGAK_	A0A6C1EUG3	Phosphoglycerate kinase OS=Staphylococcus aureus OX=1280 GN=GZ067_05860 PE=4 SV=1	4	522.805	1.1902	0.0086727	33.248	1
559	FIGGVVNDPHKPVVAILGGAK	21	Unmodified	_FIGGVVNDPHKPVVAILGGAK_	A0A6C1EUG3	Phosphoglycerate kinase OS=Staphylococcus aureus OX=1280 GN=GZ067_05860 PE=4 SV=1	4	522.805	2.7828	0.0056708	38.377	1
560	FIGGVVNDPHKPVVAILGGAK	21	Unmodified	_FIGGVVNDPHKPVVAILGGAK_	A0A6C1EUG3	Phosphoglycerate kinase OS=Staphylococcus aureus OX=1280 GN=GZ067_05860 PE=4 SV=1	4	522.805	2.1	0.0086012	33.37	1
561	FIGGVVNDPHKPVVAILGGAK	21	malon(K)	_FIGGVVNDPHK(ma)PVVAILGGAK_	A0A6C1EUG3	Phosphoglycerate kinase OS=Staphylococcus aureus OX=1280 GN=GZ067_05860 PE=4 SV=1	3	725.404	1.2492	0.0075205	40.986	1
562	FIHCSDLHLDSPFK	14	Unmodified	_FIHCSDLHLDSPFK_	A0A6B5IXG1	DNA repair exonuclease (Fragment) OS=Staphylococcus aureus OX=1280 GN=G0Y39_13225 PE=4 SV=1	4	429.711	0.31666	0.028717	17.807	1
563	FIHQSPVNDELSALIK	16	Unmodified	_FIHQSPVNDELSALIK_	W8U3A1	Alkyl hydroperoxide reductase AhpD OS=Staphylococcus aureus OX=1280 GN=BTN44_14950 PE=3 SV=1	3	604.328	1.8399	0.00072369	69.331	1
564	FILINDFEK	9	Unmodified	_FILINDFEK_	A0A077U2A0	Ribitol-5-phosphate cytidylyltransferase OS=Staphylococcus aureus OX=1280 GN=ispD2 PE=3 SV=1	2	569.811	1.8557	0.011765	70.439	1
565	FINFEESVK	9	Unmodified	_FINFEESVK_	A0A6B5JEB1	FKLRK protein OS=Staphylococcus aureus OX=1280 GN=G0V65_06420 PE=4 SV=1	2	556.785		0.010775	61.593	1
567	FINVEIVHTHDYASFAR	17	Unmodified	_FINVEIVHTHDYASFAR_	A0A142G9F0	N-acetylmuramoyl-L-alanine amidase OS=Staphylococcus aureus OX=1280 GN=atl PE=4 SV=1	4	505.508	0.87236	0.000937	63.691	1
568	FIVGSVSESIVR	12	Unmodified	_FIVGSVSESIVR_	T1Y978	Universal stress protein OS=Staphylococcus aureus subsp. aureus CN1 OX=1193576 GN=SAKOR_01651 PE=3 SV=1	2	646.864	1.7498	0.00073624	89.301	1
569	FKNSDNEQVK	10	malon(K)	_FK(ma)NSDNEQVK_	X5E0H3	Uncharacterized protein OS=Staphylococcus aureus OX=1280 GN=BN1321_260262 PE=4 SV=1	2	647.799		3.3453e-11	112.95	1
570	FLDELEK	7	Unmodified	_FLDELEK_	A0A6B0CMV4	GTP-sensing pleiotropic transcriptional regulator CodY (Fragment) OS=Staphylococcus aureus OX=1280 GN=codY PE=4 SV=1	2	447.234	-1.5264	0.013304	111.65	1
571	FLENKGLWNEEKENEVIER	19	malon(K)	_FLENKGLWNEEK(ma)ENEVIER_	A0A0U1MY72	Pyruvate dehydrogenase E1 component subunit alpha OS=Staphylococcus aureus OX=1280 GN=pdhA PE=4 SV=1	3	821.399	-0.18518	0.00048192	66.893	1
572	FLLSHGFVMDGEGK	14	Unmodified	_FLLSHGFVMDGEGK_	Q6GHP2	Isoleucine--tRNA ligase OS=Staphylococcus aureus (strain MRSA252) OX=282458 GN=ileS PE=3 SV=1	3	512.922	-2.6037	0.0010581	71.031	1
573	FLMTEQELLDK	11	Oxidation (M)	_FLM(ox)TEQELLDK_	A0A6B5MGD4	ATP-dependent metallopeptidase FtsH/Yme1/Tma family protein OS=Staphylococcus aureus OX=1280 GN=G0Z30_13305 PE=4 SV=1	2	691.847	-0.04584	0.0040327	66.267	1
574	FLNPQEYPVDLSK	13	Unmodified	_FLNPQEYPVDLSK_	A0A380EL27	NH(3)-dependent NAD(+) synthetase OS=Staphylococcus aureus OX=1280 GN=nadE PE=3 SV=1	2	775.398	1.2936	0.0015778	84.365	1
575	FLNVGENLWGLR	12	Unmodified	_FLNVGENLWGLR_	A0A5C8XAM8	Probable DNA-directed RNA polymerase subunit delta (Fragment) OS=Staphylococcus aureus OX=1280 GN=FVP29_04565 PE=3 SV=1	2	709.383	-0.47646	0.010537	62.088	1
576	FLSGSTK	7	Unmodified	_FLSGSTK_	W8TRP5	50S ribosomal protein L31 type B OS=Staphylococcus aureus OX=1280 GN=rpmEB PE=1 SV=1	2	370.203	-2.2191	0.025451	86.472	1
577	FLTSLNAFPVDR	12	Unmodified	_FLTSLNAFPVDR_	A0A6A8FYG7	1-acyl-sn-glycerol-3-phosphate acyltransferase (Fragment) OS=Staphylococcus aureus OX=1280 GN=GF572_06090 PE=4 SV=1	2	690.37	1.7528	0.00012606	99.5	1
578	FMCLIAAPEGVEK	13	Oxidation (M)	_FM(ox)CLIAAPEGVEK_	W8U942	Uracil phosphoribosyltransferase OS=Staphylococcus aureus OX=1280 GN=upp PE=3 SV=1	2	740.862	-2.8193	0.011278	50.088	1
579	FMCLIAAPEGVEK	13	Unmodified	_FMCLIAAPEGVEK_	W8U942	Uracil phosphoribosyltransferase OS=Staphylococcus aureus OX=1280 GN=upp PE=3 SV=1	2	732.865	2.1105	0.0085672	62.398	1
580	FMDDEVVCR	9	Unmodified	_FMDDEVVCR_	R4R123	DNA-directed RNA polymerase subunit beta (Fragment) OS=Staphylococcus aureus OX=1280 GN=rpoB PE=3 SV=1	2	585.75	0.99767	0.010455	72.928	1
581	FNDADLIGLPLR	12	Unmodified	_FNDADLIGLPLR_	A0A0U1ML58	Proline--tRNA ligase OS=Staphylococcus aureus OX=1280 GN=proS PE=3 SV=1	2	672.37	-1.4077	0.016511	56.205	1
582	FNDADLIGLPLR	12	Unmodified	_FNDADLIGLPLR_	A0A0U1ML58	Proline--tRNA ligase OS=Staphylococcus aureus OX=1280 GN=proS PE=3 SV=1	2	672.37	-1.2171	0.020106	54.343	1
583	FNELGIGQFASVSGR	15	Unmodified	_FNELGIGQFASVSGR_	A0A2X2K209	2,3-bisphosphoglycerate-independent phosphoglycerate mutase OS=Staphylococcus aureus OX=1280 GN=pgm_2 PE=3 SV=1	2	791.405	1.1342	1.2653e-17	142.54	1
584	FNEVLVNEPSAK	12	Unmodified	_FNEVLVNEPSAK_	A0A6B5I265	ATP-dependent Clp protease ATP-binding subunit OS=Staphylococcus aureus OX=1280 GN=G0X69_04915 PE=4 SV=1	2	673.851	0.078692	4.0977e-07	114.87	1
585	FNGIIPISQLSTHHIDSPSEVVK	23	Unmodified	_FNGIIPISQLSTHHIDSPSEVVK_	Q6GGT5	30S ribosomal protein S1 OS=Staphylococcus aureus (strain MRSA252) OX=282458 GN=rpsA PE=3 SV=1	4	630.338	2.2605	1.1734e-06	77.575	1
586	FNGIIPISQLSTHHIDSPSEVVK	23	Unmodified	_FNGIIPISQLSTHHIDSPSEVVK_	Q6GGT5	30S ribosomal protein S1 OS=Staphylococcus aureus (strain MRSA252) OX=282458 GN=rpsA PE=3 SV=1	3	840.115	1.1966	5.5875e-12	100.47	1
587	FNGILATEGAEVLEAK	16	Unmodified	_FNGILATEGAEVLEAK_	A0A5C8X2V3	30S ribosomal protein S6 (Fragment) OS=Staphylococcus aureus OX=1280 GN=FVP29_18255 PE=3 SV=1	2	831.441	0.81728	0.00046368	84.859	1
588	FNGILATEGAEVLEAK	16	Unmodified	_FNGILATEGAEVLEAK_	A0A5C8X2V3	30S ribosomal protein S6 (Fragment) OS=Staphylococcus aureus OX=1280 GN=FVP29_18255 PE=3 SV=1	3	554.63	-0.56088	3.6325e-05	92.773	1
589	FNGIVEFLHLDK	12	Unmodified	_FNGIVEFLHLDK_	A0A6B5I265	ATP-dependent Clp protease ATP-binding subunit OS=Staphylococcus aureus OX=1280 GN=G0X69_04915 PE=4 SV=1	3	477.926	1.2383	0.016843	37.613	1
590	FNLEYINNNAK	11	Unmodified	_FNLEYINNNAK_	Q6GGY5	PTS system glucose-specific EIIA component OS=Staphylococcus aureus (strain MRSA252) OX=282458 GN=crr PE=3 SV=1	2	670.336	0.63069	8.5263e-07	128.81	1
591	FNNSYLSDEVTR	12	Unmodified	_FNNSYLSDEVTR_	A0A6B0CS07	Mannitol-1-phosphate 5-dehydrogenase (Fragment) OS=Staphylococcus aureus OX=1280 GN=GO941_05265 PE=4 SV=1	2	722.839	-1.3211	0.0031845	73.927	1
592	FNNVESAVTR	10	Unmodified	_FNNVESAVTR_	A0A5C8X6A7	Dihydropteroate synthase (Fragment) OS=Staphylococcus aureus OX=1280 GN=FVP29_11580 PE=4 SV=1	2	568.788		0.00011167	84.507	1
593	FNSAIEASK	9	Unmodified	_FNSAIEASK_	T1Y8C2	Phosphoenolpyruvate-protein phosphotransferase OS=Staphylococcus aureus subsp. aureus CN1 OX=1193576 GN=SAKOR_01005 PE=3 SV=1	2	483.748	0.08405	0.02712	57.532	1
594	FNTEVTENLMK	11	Oxidation (M)	_FNTEVTENLM(ox)K_	W8TUC3	50S ribosomal protein L5 OS=Staphylococcus aureus OX=1280 GN=rplE PE=1 SV=1	2	671.321	-1.1163	0.0017466	75.819	1
595	FNTEVTENLMKK	12	Oxidation (M),malon(K)	_FNTEVTENLM(ox)K(ma)K_	W8TUC3	50S ribosomal protein L5 OS=Staphylococcus aureus OX=1280 GN=rplE PE=1 SV=1	2	778.369	1.7845	0.0080591	54.402	1
596	FNYSSVMEVPK	11	Oxidation (M)	_FNYSSVM(ox)EVPK_	W8TUC3	50S ribosomal protein L5 OS=Staphylococcus aureus OX=1280 GN=rplE PE=1 SV=1	2	658.813	-0.25272	0.0093719	56.087	1
597	FNYSSVMEVPK	11	Unmodified	_FNYSSVMEVPK_	W8TUC3	50S ribosomal protein L5 OS=Staphylococcus aureus OX=1280 GN=rplE PE=1 SV=1	2	650.816	0.48698	0.01085	64.121	1
598	FPESTLRPLGR	11	Unmodified	_FPESTLRPLGR_	A0A6B5I2R8	DNA gyrase subunit A OS=Staphylococcus aureus OX=1280 GN=gyrA PE=4 SV=1	3	424.907	1.7295	0.025761	31.597	1
599	FPESVAITDEVEK	13	Unmodified	_FPESVAITDEVEK_	T1Y9R0	Acetate kinase OS=Staphylococcus aureus subsp. aureus CN1 OX=1193576 GN=ackA PE=3 SV=1	2	732.367	2.2262	2.4924e-24	173.06	1
600	FPETSGIGIK	10	Unmodified	_FPETSGIGIK_	A0A5C8X7X3	Isocitrate dehydrogenase [NADP] (Fragment) OS=Staphylococcus aureus OX=1280 GN=FVP29_09945 PE=4 SV=1	2	524.787	1.1341	0.0062425	73.885	1
601	FPLGQAVYFDTEK	13	Unmodified	_FPLGQAVYFDTEK_	Q99UH2	Aerobic glycerol-3-phosphate dehydrogenase OS=Staphylococcus aureus (strain Mu50 / ATCC 700699) OX=158878 GN=glpD PE=3 SV=2	3	505.589	-0.41499	0.014401	39.166	1
602	FPLGQAVYFDTEK	13	Unmodified	_FPLGQAVYFDTEK_	Q99UH2	Aerobic glycerol-3-phosphate dehydrogenase OS=Staphylococcus aureus (strain Mu50 / ATCC 700699) OX=158878 GN=glpD PE=3 SV=2	2	757.88	0.52094	0.004133	69.92	1
603	FPVLFPVVDK	10	Unmodified	_FPVLFPVVDK_	A0A380DZL5	Dihydroorotate dehydrogenase (quinone) OS=Staphylococcus aureus OX=1280 GN=pyrD PE=3 SV=1	2	580.839	1.1552	0.0063732	73.499	1
604	FPVVQNVNAQGETDK	15	Unmodified	_FPVVQNVNAQGETDK_	A0A077UDZ4	Malonyl CoA-acyl carrier protein transacylase OS=Staphylococcus aureus OX=1280 GN=fabD PE=3 SV=1	2	823.413	-1.4818	1.3678e-19	145.52	1
605	FPVVQNVNAQGETDKEVIK	19	Unmodified	_FPVVQNVNAQGETDKEVIK_	A0A077UDZ4	Malonyl CoA-acyl carrier protein transacylase OS=Staphylococcus aureus OX=1280 GN=fabD PE=3 SV=1	3	705.708	-2.0847	2.4457e-08	103.13	1
606	FQALEELPSQIK	12	2 Deamidation (NQ)	_FQ(de)ALEELPSQ(de)IK_	Q9L8I6	Ref OS=Staphylococcus aureus OX=1280 GN=rep PE=4 SV=1	2	702.866	0.57578	0.018245	51.998	1
607	FQLATGQLEETAR	13	Unmodified	_FQLATGQLEETAR_	Q6GEJ1	50S ribosomal protein L29 OS=Staphylococcus aureus (strain MRSA252) OX=282458 GN=rpmC PE=3 SV=1	2	732.378	-0.047904	0.0014598	85.271	1
608	FQLTDIPPAER	11	Unmodified	_FQLTDIPPAER_	A0A6B5UN24	Molecular chaperone DnaK OS=Staphylococcus aureus OX=1280 GN=dnaK PE=4 SV=1	2	643.841	-0.15346	0.0014836	86.911	1
609	FQPVQVDEPSVVDTVAILK	19	Unmodified	_FQPVQVDEPSVVDTVAILK_	A0A6B0A7W0	AAA domain-containing protein OS=Staphylococcus aureus OX=1280 GN=GO651_14495 PE=4 SV=1	3	695.381	-1.5886	0.0018521	53.037	1
610	FQQYAGTEVK	10	Unmodified	_FQQYAGTEVK_	A0A380DUY0	Heat shock protein 60 family co-chaperone GroES OS=Staphylococcus aureus OX=1280 GN=groES_2 PE=4 SV=1	2	585.793	1.1635	0.013721	64.374	1
611	FSASAAEAIDAK	12	Unmodified	_FSASAAEAIDAK_	T1YCD9	50S ribosomal protein L15 OS=Staphylococcus aureus subsp. aureus CN1 OX=1193576 GN=rplO PE=3 SV=1	2	590.796	2.5322	3.0582e-06	107.39	1
612	FSEGLHQAIEAK	12	Unmodified	_FSEGLHQAIEAK_	A0A6B1RIH8	Preprotein translocase subunit SecA OS=Staphylococcus aureus OX=1280 GN=secA PE=4 SV=1	2	665.344	0.21015	1.2116e-15	162.93	1
613	FSIDFDESQSIGK	13	Unmodified	_FSIDFDESQSIGK_	W8UAF4	Glycine--tRNA ligase OS=Staphylococcus aureus OX=1280 GN=glyS PE=3 SV=1	2	736.849	0.81981	0.0024917	78.814	1
614	FSTSIGLGMYDR	12	Oxidation (M)	_FSTSIGLGM(ox)YDR_	Q99UH2	Aerobic glycerol-3-phosphate dehydrogenase OS=Staphylococcus aureus (strain Mu50 / ATCC 700699) OX=158878 GN=glpD PE=3 SV=2	2	681.822	-0.79695	0.01218	51.135	1
615	FSTSIGLGMYDR	12	Unmodified	_FSTSIGLGMYDR_	Q99UH2	Aerobic glycerol-3-phosphate dehydrogenase OS=Staphylococcus aureus (strain Mu50 / ATCC 700699) OX=158878 GN=glpD PE=3 SV=2	2	673.824	1.5275	0.000396	92.856	1
616	FSTVAGER	8	Unmodified	_FSTVAGER_	A0A5C8X7Z5	Catalase (Fragment) OS=Staphylococcus aureus OX=1280 GN=FVP29_08195 PE=4 SV=1	2	433.722	2.5963	0.024578	69.598	1
617	FTALVVVGDK	10	Unmodified	_FTALVVVGDK_	A6QJ75	30S ribosomal protein S5 OS=Staphylococcus aureus (strain Newman) OX=426430 GN=rpsE PE=3 SV=1	2	524.806	2.108	0.018391	60.255	1
618	FTDLNSPQKR	10	malon(K)	_FTDLNSPQK(ma)R_	A0A5C8X5B7	30S ribosomal protein S12 (Fragment) OS=Staphylococcus aureus OX=1280 GN=FVP29_13465 PE=4 SV=1	2	646.317	2.494	0.00097432	91.961	1
619	FTEDAEDAGVVK	12	Unmodified	_FTEDAEDAGVVK_	A1XFF2	FemA (Fragment) OS=Staphylococcus aureus OX=1280 GN=femA PE=4 SV=1	2	640.804	-1.0159	0.00073624	89.301	1
620	FTEGNCYGLIGANGAGK	17	Unmodified	_FTEGNCYGLIGANGAGK_	W8TWE8	ABC efflux transporter (ATP-binding protein) OS=Staphylococcus aureus OX=1280 GN=ykpA PE=4 SV=1	2	864.904	-0.097295	0.00073564	78.69	1
621	FTEGNCYGLIGANGAGK	17	Deamidation (NQ)	_FTEGNCYGLIGAN(de)GAGK_	W8TWE8	ABC efflux transporter (ATP-binding protein) OS=Staphylococcus aureus OX=1280 GN=ykpA PE=4 SV=1	2	865.396	1.5819	0.0096667	79.346	1
622	FTEGSFK	7	Unmodified	_FTEGSFK_	A0A5C8X7X3	Isocitrate dehydrogenase [NADP] (Fragment) OS=Staphylococcus aureus OX=1280 GN=FVP29_09945 PE=4 SV=1	2	408.2	1.0367	0.02549	89.55	1
623	FTEPIVQALQSLGVNAELTGR	21	Unmodified	_FTEPIVQALQSLGVNAELTGR_	A0A6B5IK06	Lipoate--protein ligase (Fragment) OS=Staphylococcus aureus OX=1280 GN=G0Y40_13085 PE=4 SV=1	3	748.406	1.3531	7.9942e-21	135.49	1
624	FTEYDNK	7	Unmodified	_FTEYDNK_	A0A6B5INL4	YtxH domain-containing protein (Fragment) OS=Staphylococcus aureus OX=1280 GN=G0Y40_12015 PE=4 SV=1	2	458.706	0.44808	0.0039937	124.34	1
625	FTGQSACFR	9	Unmodified	_FTGQSACFR_	A0A0U1MFX6	Serine--tRNA ligase OS=Staphylococcus aureus OX=1280 GN=serS PE=3 SV=1	2	537.245	-0.10046	0.0011483	104.2	1
626	FTLDEGLSK	9	Unmodified	_FTLDEGLSK_	A0A6B5MHG9	Valine--tRNA ligase OS=Staphylococcus aureus OX=1280 GN=G0X47_01375 PE=4 SV=1	2	505.264	1.0988	0.02192	61.765	1
627	FTLVHNGVIENYEELK	16	Unmodified	_FTLVHNGVIENYEELK_	A0A6B5B7N3	Glutamine--fructose-6-phosphate transaminase (Isomerizing) OS=Staphylococcus aureus OX=1280 GN=glmS PE=4 SV=1	2	952.991	-3.0173	4.4004e-48	206.62	1
628	FTNIVDR	7	Unmodified	_FTNIVDR_	A0A380DX73	Adenylosuccinate lyase OS=Staphylococcus aureus OX=1280 GN=purB_2 PE=4 SV=1	2	432.732		0.0062398	89.752	1
629	FTQAGSEVSALLGR	14	Unmodified	_FTQAGSEVSALLGR_	W8UW00	ATP synthase subunit beta OS=Staphylococcus aureus OX=1280 GN=atpD PE=3 SV=1	2	718.381	0.8429	0.00016921	97.273	1
630	FTSGDYTTK	9	Unmodified	_FTSGDYTTK_	A0A077UM26	Pyruvate carboxylase OS=Staphylococcus aureus OX=1280 GN=cfiB_1 PE=4 SV=1	2	510.238	0.059566	0.024009	60.064	1
631	FVAAQEIDVK	10	Unmodified	_FVAAQEIDVK_	A0A2D1GVD7	EntK (Fragment) OS=Staphylococcus aureus OX=1280 GN=entk PE=4 SV=1	2	560.306	1.7253	0.032023	53.237	1
632	FVADTSYETK	10	Unmodified	_FVADTSYETK_	A0A6B0D3M6	Acetolactate decarboxylase (Fragment) OS=Staphylococcus aureus OX=1280 GN=GO941_16515 PE=4 SV=1	2	580.777	0.6981	0.0013652	91.549	1
633	FVAFLTEETK	10	Unmodified	_FVAFLTEETK_	W8TVM8	Threonine--tRNA ligase OS=Staphylococcus aureus OX=1280 GN=thrS PE=3 SV=1	2	592.814		1.7509e-07	94.692	1
634	FVDNNEINIDHTGVSDELGGQGVGK	25	Unmodified	_FVDNNEINIDHTGVSDELGGQGVGK_	Q2FVA6	N-acetyltransferase domain-containing protein OS=Staphylococcus aureus (strain NCTC 8325) OX=93061 GN=SAOUHSC_02827 PE=4 SV=1	3	872.084	-1.0628	2.821e-06	67.11	1
635	FVEDTAAFINK	11	Unmodified	_FVEDTAAFINK_	Q2G0F3	AB hydrolase-1 domain-containing protein OS=Staphylococcus aureus (strain NCTC 8325) OX=93061 GN=SAOUHSC_00616 PE=4 SV=1	2	627.822	-2.9455	0.0003347	94.363	1
636	FVEFFGPGVQHLPLADR	17	Unmodified	_FVEFFGPGVQHLPLADR_	W8UY08	Aconitate hydratase OS=Staphylococcus aureus OX=1280 GN=citB PE=3 SV=1	3	643.672	1.032	9.0462e-13	126.63	1
637	FVESGENK	8	Unmodified	_FVESGENK_	A0A659FUB0	Carbamate kinase OS=Staphylococcus aureus OX=1280 GN=arcC PE=3 SV=1	2	455.219	-1.3997	0.020471	74.301	1
638	FVIGGPQGDAGLTGR	15	Unmodified	_FVIGGPQGDAGLTGR_	A0A380ELS4	S-adenosylmethionine synthase OS=Staphylococcus aureus OX=1280 GN=metK_1 PE=3 SV=1	2	722.881	0.42378	0.0020089	78.69	1
639	FVNDAFGTAHR	11	Unmodified	_FVNDAFGTAHR_	A0A380E2U6	Phosphoglycerate kinase OS=Staphylococcus aureus OX=1280 GN=pgk PE=3 SV=1	3	412.204	-0.12101	0.00096566	75.819	1
640	FVNEALDNNEQSVEDYK	17	Unmodified	_FVNEALDNNEQSVEDYK_	A0A2Y9TRY4	Aspartyl/glutamyl-tRNA(Asn/Gln) amidotransferase subunit B OS=Staphylococcus aureus OX=1280 GN=gatB PE=3 SV=1	3	671.973	1.3389	4.567e-08	107.5	1
641	FVNEALDNNEQSVEDYK	17	Unmodified	_FVNEALDNNEQSVEDYK_	A0A2Y9TRY4	Aspartyl/glutamyl-tRNA(Asn/Gln) amidotransferase subunit B OS=Staphylococcus aureus OX=1280 GN=gatB PE=3 SV=1	2	1007.46	0.74712	3.265e-31	166.92	1
642	FVNSGTEAVMTTIR	14	Oxidation (M)	_FVNSGTEAVM(ox)TTIR_	X5E188	Glutamate-1-semialdehyde 2,1-aminomutase OS=Staphylococcus aureus OX=1280 GN=gsaB PE=3 SV=1	2	771.385	1.497	0.0037286	59.709	1
643	FVPTELGEIVHEQVK	15	Unmodified	_FVPTELGEIVHEQVK_	T1Y9E7	DNA topoisomerase 1 OS=Staphylococcus aureus subsp. aureus CN1 OX=1193576 GN=topA PE=3 SV=1	3	575.645	-0.14536	2.6303e-05	97.45	1
644	FVVFSDEK	8	Unmodified	_FVVFSDEK_	A0A6B1RUQ0	Translation initiation factor IF-2 OS=Staphylococcus aureus OX=1280 GN=infB PE=4 SV=1	2	485.748	1.4778	0.012182	89.698	1
645	FVVGYVETK	9	Unmodified	_FVVGYVETK_	A0A5C8X7Y7	Phenylalanine--tRNA ligase beta subunit (Fragment) OS=Staphylococcus aureus OX=1280 GN=FVP29_09825 PE=3 SV=1	2	521.284	1.0594	0.013454	68.657	1
646	FVYLTNEGAQLER	13	Unmodified	_FVYLTNEGAQLER_	A0A0U1MFX6	Serine--tRNA ligase OS=Staphylococcus aureus OX=1280 GN=serS PE=3 SV=1	2	770.394	1.762	1.9175e-18	163.71	1
647	FYDATYYDMSDK	12	Oxidation (M)	_FYDATYYDM(ox)SDK_	A0A6B5I1G4	Polyglycerol-phosphate lipoteichoic acid synthase LtaS (Fragment) OS=Staphylococcus aureus OX=1280 GN=ltaS PE=4 SV=1	2	767.806	1.8038	0.011652	51.726	1
648	FYDATYYDMSDK	12	Unmodified	_FYDATYYDMSDK_	A0A6B5I1G4	Polyglycerol-phosphate lipoteichoic acid synthase LtaS (Fragment) OS=Staphylococcus aureus OX=1280 GN=ltaS PE=4 SV=1	2	759.808	-0.20735	0.015807	56.569	1
649	FYLVQDYNSGNK	12	Unmodified	_FYLVQDYNSGNK_	A0A142G9F0	N-acetylmuramoyl-L-alanine amidase OS=Staphylococcus aureus OX=1280 GN=atl PE=4 SV=1	2	724.346	-0.13556	0.0096886	63.091	1
650	FYNLSEIAR	9	Unmodified	_FYNLSEIAR_	W8TV52	Ferritin OS=Staphylococcus aureus OX=1280 GN=ftnA PE=3 SV=1	2	556.79	1.5468	0.0012084	103.55	1
651	FYTPDDIIGK	10	Unmodified	_FYTPDDIIGK_	A0A0U1MI40	Methionine--tRNA ligase OS=Staphylococcus aureus OX=1280 GN=metS PE=3 SV=1	2	584.798	-3.0101	0.014571	63.624	1
652	GAAIGAGTAGLAGGAASK	18	Unmodified	_GAAIGAGTAGLAGGAASK_	A0A6B1RQF5	Elastin-binding protein EbpS OS=Staphylococcus aureus OX=1280 GN=ebpS PE=4 SV=1	2	700.878	1.4029	9.4596e-05	85.046	1
653	GAAIGAGTAGLAGGAASK	18	Unmodified	_GAAIGAGTAGLAGGAASK_	A0A6B1RQF5	Elastin-binding protein EbpS OS=Staphylococcus aureus OX=1280 GN=ebpS PE=4 SV=1	2	700.878	1.3623	0.0048184	59.252	1
654	GAAIGAGTAGLAGGAASKSASAASK	25	malon(K)	_GAAIGAGTAGLAGGAASK(ma)SASAASK_	A0A6B1RQF5	Elastin-binding protein EbpS OS=Staphylococcus aureus OX=1280 GN=ebpS PE=4 SV=1	3	697.022	-0.42666	8.7255e-05	54.865	1
655	GAEIINYTK	9	Unmodified	_GAEIINYTK_	Q99UH2	Aerobic glycerol-3-phosphate dehydrogenase OS=Staphylococcus aureus (strain Mu50 / ATCC 700699) OX=158878 GN=glpD PE=3 SV=2	2	504.772	-1.4311	0.011966	70.056	1
656	GAFEENIQKLIEGVK	15	malon(K)	_GAFEENIQK(ma)LIEGVK_	A0A077UTD0	Putative ATP-dependent protease ATP-binding subunit ClpL OS=Staphylococcus aureus OX=1280 GN=clpL PE=3 SV=1	2	880.957	0.70003	0.0011017	89.624	1
657	GAHPCIISMEGLEK	14	Unmodified	_GAHPCIISMEGLEK_	A0A6B5B7N3	Glutamine--fructose-6-phosphate transaminase (Isomerizing) OS=Staphylococcus aureus OX=1280 GN=glmS PE=4 SV=1	3	514.587	-0.00064489	0.00077665	77.894	1
658	GAHPCIISMEGLEK	14	Unmodified	_GAHPCIISMEGLEK_	A0A6B5B7N3	Glutamine--fructose-6-phosphate transaminase (Isomerizing) OS=Staphylococcus aureus OX=1280 GN=glmS PE=4 SV=1	2	771.376	0.044422	0.0037548	73.386	1
659	GALPHGVASDK	11	Unmodified	_GALPHGVASDK_	A0A6B5HWV6	Aminopeptidase P family protein OS=Staphylococcus aureus OX=1280 GN=G0X69_01445 PE=4 SV=1	2	526.28	-1.5342	0.0002076	96.946	1
660	GALSNYQQVK	10	Unmodified	_GALSNYQQVK_	T1Y6J4	Aldehyde dehydrogenase B OS=Staphylococcus aureus subsp. aureus CN1 OX=1193576 GN=SAKOR_00147 PE=3 SV=1	2	554.293	0.82125	0.00059229	95.775	1
661	GAMVQESMK	9	2 Oxidation (M)	_GAM(ox)VQESM(ox)K_	A0A2S6DIN8	Alpha-ketoacid dehydrogenase subunit beta (Fragment) OS=Staphylococcus aureus OX=1280 GN=CSC87_16020 PE=4 SV=1	2	506.726	-2.9378	0.020847	48.423	1
662	GAMVQESMK	9	Oxidation (M)	_GAM(ox)VQESMK_	A0A2S6DIN8	Alpha-ketoacid dehydrogenase subunit beta (Fragment) OS=Staphylococcus aureus OX=1280 GN=CSC87_16020 PE=4 SV=1	2	498.728	1.2273	0.0023422	83.948	1
663	GAMVQESMK	9	Oxidation (M)	_GAMVQESM(ox)K_	A0A2S6DIN8	Alpha-ketoacid dehydrogenase subunit beta (Fragment) OS=Staphylococcus aureus OX=1280 GN=CSC87_16020 PE=4 SV=1	2	498.728		0.023488	47.187	1
664	GATSHYDYVCNEVAK	15	Unmodified	_GATSHYDYVCNEVAK_	A0A5C8X9V2	6,7-dimethyl-8-ribityllumazine synthase (Fragment) OS=Staphylococcus aureus OX=1280 GN=FVP29_04600 PE=3 SV=1	3	571.923	-0.42628	0.00072186	73.722	1
665	GATYYGVAMGLAR	13	Unmodified	_GATYYGVAMGLAR_	T1Y5L6	L-lactate dehydrogenase OS=Staphylococcus aureus subsp. aureus CN1 OX=1193576 GN=ldh PE=3 SV=1	2	665.335	-2.4628	0.0052772	67.879	1
666	GCLLIEGDHLK	11	Unmodified	_GCLLIEGDHLK_	A0A6B5IXG1	DNA repair exonuclease (Fragment) OS=Staphylococcus aureus OX=1280 GN=G0Y39_13225 PE=4 SV=1	2	627.829	-0.79059	0.0086747	50.354	1
667	GDDHISNTPK	10	Unmodified	_GDDHISNTPK_	A0A380DKX8	Glutamate--tRNA ligase OS=Staphylococcus aureus OX=1280 GN=gltX_1 PE=3 SV=1	3	361.84	0.6962	0.00012923	98.04	1
668	GDDHISNTPK	10	Unmodified	_GDDHISNTPK_	A0A380DKX8	Glutamate--tRNA ligase OS=Staphylococcus aureus OX=1280 GN=gltX_1 PE=3 SV=1	2	542.257	0.0057419	8.1462e-05	131.09	1
669	GDDSVTQLILPIR	13	Unmodified	_GDDSVTQLILPIR_	A0A380DPU0	DNA polymerase III beta subunit OS=Staphylococcus aureus OX=1280 GN=dnaN_1 PE=3 SV=1	2	713.899	-0.55861	3.1455e-07	113.24	1
670	GDENFIADGLSFEQMK	16	Unmodified	_GDENFIADGLSFEQMK_	W8UAF4	Glycine--tRNA ligase OS=Staphylococcus aureus OX=1280 GN=glyS PE=3 SV=1	2	900.909	-1.6479	0.0017581	75.143	1
671	GDEYIIEMLK	10	Unmodified	_GDEYIIEMLK_	A0A380E475	GTPase Era OS=Staphylococcus aureus OX=1280 GN=bex_1 PE=3 SV=1	2	605.805	-0.6854	0.015884	62.466	1
672	GDGAESVIIELV	12	Unmodified	_GDGAESVIIELV_	T1YBP9	50S ribosomal protein L17 OS=Staphylococcus aureus subsp. aureus CN1 OX=1193576 GN=rplQ PE=3 SV=1	2	601.319	-0.50024	0.021602	53.567	1
673	GDGNINLNVHK	11	Unmodified	_GDGNINLNVHK_	A0A380E2N0	Putative lipoprotein OS=Staphylococcus aureus OX=1280 GN=NCTC5664_02911 PE=4 SV=1	2	590.807	-1.3455	0.0031169	78.513	1
674	GDQIDNANHFADK	13	Unmodified	_GDQIDNANHFADK_	Q2FH20	UDP-N-acetylglucosamine--N-acetylmuramyl-(pentapeptide) pyrophosphoryl-undecaprenol N-acetylglucosamine transferase OS=Staphylococcus aureus (strain USA300) OX=367830 GN=murG PE=3 SV=1	2	722.826	0.73009	0.0071266	64.798	1
675	GDQSLENVK	9	Unmodified	_GDQSLENVK_	W8TRN2	Exported protein OS=Staphylococcus aureus OX=1280 GN=BTN44_09520 PE=4 SV=1	2	495.249	0.51923	0.0041355	87.258	1
676	GDSNNKMLQR	10	malon(K)	_GDSNNK(ma)MLQR_	W8TVM8	Threonine--tRNA ligase OS=Staphylococcus aureus OX=1280 GN=thrS PE=3 SV=1	2	624.786		0.006817	71.085	1
677	GDTNIQYLLK	10	Unmodified	_GDTNIQYLLK_	A0A380DRP4	Thymidylate synthase OS=Staphylococcus aureus OX=1280 GN=thyA_2 PE=4 SV=1	2	582.817	-3.6993	0.0073716	70.552	1
678	GEAYFVDNNSLR	12	Unmodified	_GEAYFVDNNSLR_	W8URN4	Dihydrolipoyl dehydrogenase OS=Staphylococcus aureus OX=1280 GN=lpdA PE=3 SV=1	2	692.828	-0.39	0.00040321	92.781	1
679	GEDEVLNPGNTEAMIK	16	Oxidation (M)	_GEDEVLNPGNTEAM(ox)IK_	A0A0U1MX25	Phosphomethylpyrimidine kinase OS=Staphylococcus aureus OX=1280 GN=pdxK PE=4 SV=1	2	866.907	-0.19369	0.00012722	89.506	1
680	GEDIELTHR	9	Unmodified	_GEDIELTHR_	A0A5C8X503	Response regulator transcription factor (Fragment) OS=Staphylococcus aureus OX=1280 GN=FVP29_14825 PE=4 SV=1	3	357.181	1.3072	0.015563	44.98	1
681	GEFSFDSHGAGFR	13	Unmodified	_GEFSFDSHGAGFR_	A0A6B5JEB1	FKLRK protein OS=Staphylococcus aureus OX=1280 GN=G0V65_06420 PE=4 SV=1	3	471.878	0.16388	0.018077	35.657	1
682	GEHQLPLFR	9	Unmodified	_GEHQLPLFR_	A0A6B5QAS7	Glutathione peroxidase (Fragment) OS=Staphylococcus aureus OX=1280 GN=G0Y42_13265 PE=4 SV=1	3	366.201		0.0061521	57.708	1
683	GEHQNVKLNR	10	malon(K)	_GEHQNVK(ma)LNR_	A0A380DX99	Molybdenum cofactor biosynthesis protein B OS=Staphylococcus aureus OX=1280 GN=moaB_2 PE=4 SV=1	3	427.55	-0.64173	0.027781	44.425	1
684	GEHQNVKLNR	10	malon(K)	_GEHQNVK(ma)LNR_	A0A380DX99	Molybdenum cofactor biosynthesis protein B OS=Staphylococcus aureus OX=1280 GN=moaB_2 PE=4 SV=1	2	640.821	-0.86611	0.010063	74.237	1
685	GEIAGVAQR	9	Unmodified	_GEIAGVAQR_	Q8NWX7	Glycerol kinase OS=Staphylococcus aureus (strain MW2) OX=196620 GN=glpK PE=3 SV=1	2	450.749		0.00011215	91.069	1
686	GEILEVLAK	9	Unmodified	_GEILEVLAK_	A0A6B1RH94	Arginine--tRNA ligase OS=Staphylococcus aureus OX=1280 GN=GAY51_04740 PE=4 SV=1	2	486.292	-0.91899	0.011147	71.614	1
687	GEILHFPVDNYYYEGK	16	Unmodified	_GEILHFPVDNYYYEGK_	A0A380EL94	Putative methyltransferase OS=Staphylococcus aureus OX=1280 GN=ycgJ_2 PE=4 SV=1	3	648.644	-1.0599	8.4052e-05	88.19	1
688	GEILHFPVDNYYYEGK	16	Unmodified	_GEILHFPVDNYYYEGK_	A0A380EL94	Putative methyltransferase OS=Staphylococcus aureus OX=1280 GN=ycgJ_2 PE=4 SV=1	2	972.462	-1.3335	0.00028261	89.311	1
689	GELATTGSTELICIK	15	Unmodified	_GELATTGSTELICIK_	A0A6A9GTN9	YbgC/FadM family acyl-CoA thioesterase OS=Staphylococcus aureus OX=1280 GN=GAY51_07890 PE=4 SV=1	2	796.914	-0.76389	0.0027253	74.296	1
690	GELQCIGATTLDEYR	15	Unmodified	_GELQCIGATTLDEYR_	A0A6B0A7W0	AAA domain-containing protein OS=Staphylococcus aureus OX=1280 GN=GO651_14495 PE=4 SV=1	2	863.409	1.2441	0.0046323	66.826	1
691	GELQQFNDQR	10	Unmodified	_GELQQFNDQR_	A0A6B1RD55	Glycerophosphodiester phosphodiesterase OS=Staphylococcus aureus OX=1280 GN=GAY51_03260 PE=4 SV=1	2	617.794	-0.064105	1.8554e-05	138.22	1
692	GELVPDEVTVGIVK	14	Unmodified	_GELVPDEVTVGIVK_	W8TRE5	Adenylate kinase OS=Staphylococcus aureus OX=1280 GN=adk PE=3 SV=1	2	727.909	-0.066588	0.028408	45.614	1
693	GEPGTGNIVEAVR	13	Unmodified	_GEPGTGNIVEAVR_	T1Y826	Pyridoxal 5'-phosphate synthase subunit PdxS OS=Staphylococcus aureus subsp. aureus CN1 OX=1193576 GN=pdxS PE=3 SV=1	2	649.839	1.4821	0.0075435	64.104	1
694	GESVFEPEILVKMR	14	malon(K)	_GESVFEPEILVK(ma)MR_	A0A6B5IAJ9	Response regulator transcription factor OS=Staphylococcus aureus OX=1280 GN=G0V76_05795 PE=4 SV=1	2	860.435	-0.28185	0.020966	54.898	1
695	GESYQPVIFYHDEHQK	16	Unmodified	_GESYQPVIFYHDEHQK_	X5DZP8	Peptide methionine sulfoxide reductase MsrA OS=Staphylococcus aureus OX=1280 GN=msrA PE=3 SV=1	4	494.984	1.3603	0.013666	35.089	1
696	GETVTEGSSSNAYAIK	16	Unmodified	_GETVTEGSSSNAYAIK_	T1Y9U1	D-alanine aminotransferase OS=Staphylococcus aureus subsp. aureus CN1 OX=1193576 GN=SAKOR_01692 PE=3 SV=1	2	807.386	0.86128	2.0251e-17	133.48	1
697	GEVGQQFFEQHPEAANK	17	Unmodified	_GEVGQQFFEQHPEAANK_	A0A6B1RNN6	DUF393 domain-containing protein OS=Staphylococcus aureus OX=1280 GN=GAY51_12365 PE=4 SV=1	3	639.303	0.02571	0.0014281	60.307	1
698	GEVLPTK	7	Unmodified	_GEVLPTK_	T1YAQ4	30S ribosomal protein S3 OS=Staphylococcus aureus subsp. aureus CN1 OX=1193576 GN=rpsC PE=3 SV=1	2	372.219	-1.2274	0.029542	79.469	1
699	GEVLPTKNTSGGGK	14	malon(K)	_GEVLPTK(ma)NTSGGGK_	T1YAQ4	30S ribosomal protein S3 OS=Staphylococcus aureus subsp. aureus CN1 OX=1193576 GN=rpsC PE=3 SV=1	2	715.86	1.4874	0.0021469	88.385	1
700	GEVLTEGSIEPK	12	Unmodified	_GEVLTEGSIEPK_	A0A6B5TUA1	DNA-directed RNA polymerase subunit beta OS=Staphylococcus aureus OX=1280 GN=rpoC PE=4 SV=1	2	629.83	3.8821	0.00015291	97.779	1
701	GEVLTEGSIEPK	12	Unmodified	_GEVLTEGSIEPK_	A0A6B5TUA1	DNA-directed RNA polymerase subunit beta OS=Staphylococcus aureus OX=1280 GN=rpoC PE=4 SV=1	2	629.83	2.3512	0.0026942	76.24	1
702	GEYSLVDLNR	10	Unmodified	_GEYSLVDLNR_	A0A2Y9TRY4	Aspartyl/glutamyl-tRNA(Asn/Gln) amidotransferase subunit B OS=Staphylococcus aureus OX=1280 GN=gatB PE=3 SV=1	2	583.296	-0.088967	0.0063732	73.499	1
703	GFFFEPTLIAVPDNHHK	17	Unmodified	_GFFFEPTLIAVPDNHHK_	T1Y6J4	Aldehyde dehydrogenase B OS=Staphylococcus aureus subsp. aureus CN1 OX=1193576 GN=SAKOR_00147 PE=3 SV=1	3	657.004	-0.14849	7.2308e-06	95.067	1
704	GFFFEPTLIAVPDNHHK	17	Unmodified	_GFFFEPTLIAVPDNHHK_	T1Y6J4	Aldehyde dehydrogenase B OS=Staphylococcus aureus subsp. aureus CN1 OX=1193576 GN=SAKOR_00147 PE=3 SV=1	4	493.005	0.46663	0.00061514	67.326	1
705	GFGFIER	7	Unmodified	_GFGFIER_	T1Y6P3	Cold shock protein OS=Staphylococcus aureus subsp. aureus CN1 OX=1193576 GN=SAKOR_00796 PE=4 SV=1	2	413.216	-0.20337	0.025551	94.407	1
706	GFIAALDQSGGSTPK	15	Unmodified	_GFIAALDQSGGSTPK_	Q6GDJ7	Fructose-bisphosphate aldolase class 1 OS=Staphylococcus aureus (strain MRSA252) OX=282458 GN=fda PE=3 SV=3	2	724.873		2.8298e-07	73.834	1
707	GFIFVEDAGR	10	Unmodified	_GFIFVEDAGR_	Q99UU0	Carbamate kinase 1 OS=Staphylococcus aureus (strain Mu50 / ATCC 700699) OX=158878 GN=arcC1 PE=3 SV=1	2	555.783	1.6239	0.0054491	76.228	1
708	GFLEVETPMMHQIAGGAAAR	20	Unmodified	_GFLEVETPMMHQIAGGAAAR_	Q8NXZ0	Lysine--tRNA ligase OS=Staphylococcus aureus (strain MW2) OX=196620 GN=lysS PE=3 SV=1	3	696.012	0.3571	2.4744e-08	99.044	1
709	GFLVSEFANDFK	12	Unmodified	_GFLVSEFANDFK_	A0A6B1RLG9	Zinc-binding dehydrogenase OS=Staphylococcus aureus OX=1280 GN=GAY51_01625 PE=4 SV=1	2	687.34	2.574	0.003998	70.089	1
710	GFSQQAVEDLAK	12	Unmodified	_GFSQQAVEDLAK_	Q8NUK8	Ornithine carbamoyltransferase, catabolic OS=Staphylococcus aureus (strain MW2) OX=196620 GN=arcB PE=3 SV=1	2	646.828	0.52259	5.5451e-08	130.1	1
711	GFSQQAVEDLAK	12	Unmodified	_GFSQQAVEDLAK_	Q8NUK8	Ornithine carbamoyltransferase, catabolic OS=Staphylococcus aureus (strain MW2) OX=196620 GN=arcB PE=3 SV=1	2	646.828	0.38644	2.3959e-07	118.87	1
712	GFSQQAVEDLAK	12	Unmodified	_GFSQQAVEDLAK_	Q8NUK8	Ornithine carbamoyltransferase, catabolic OS=Staphylococcus aureus (strain MW2) OX=196620 GN=arcB PE=3 SV=1	2	646.828	1.5713	0.013051	59.116	1
713	GFTNINR	7	Unmodified	_GFTNINR_	T1YCD9	50S ribosomal protein L15 OS=Staphylococcus aureus subsp. aureus CN1 OX=1193576 GN=rplO PE=3 SV=1	2	411.217	-0.61955	0.025446	86.086	1
714	GGAIALGHPIGASGAR	16	Unmodified	_GGAIALGHPIGASGAR_	T1Y5Z1	Acetyl-CoA acetyltransferase OS=Staphylococcus aureus subsp. aureus CN1 OX=1193576 GN=SAKOR_00351 PE=3 SV=1	2	702.889	3.0699	0.0088782	56.514	1
715	GGDDTLFAK	9	Unmodified	_GGDDTLFAK_	Q93EN9	Putative 50S ribosomal protein L27 (Fragment) OS=Staphylococcus aureus OX=1280 PE=4 SV=1	2	462.227	-1.3845	0.0019467	95.502	1
716	GGGGALFR	8	Unmodified	_GGGGALFR_	A0A380DU08	Ribose 5-phosphate isomerase A OS=Staphylococcus aureus OX=1280 GN=rpi PE=4 SV=1	2	367.701	0.019351	0.024201	69.998	1
717	GGGRPDMAQGGGTQPENISK	20	Oxidation (M)	_GGGRPDM(ox)AQGGGTQPENISK_	Q8NW87	Alanine--tRNA ligase OS=Staphylococcus aureus (strain MW2) OX=196620 GN=alaS PE=3 SV=1	3	658.31	1.2051	2.4766e-08	98.804	1
718	GGGRPDMAQGGGTQPENISK	20	Unmodified	_GGGRPDMAQGGGTQPENISK_	Q8NW87	Alanine--tRNA ligase OS=Staphylococcus aureus (strain MW2) OX=196620 GN=alaS PE=3 SV=1	3	652.978	0.8003	3.796e-05	76.492	1
719	GGGVSETFTVR	11	Unmodified	_GGGVSETFTVR_	A0A0E1VS63	50S ribosomal protein L19 (Fragment) OS=Staphylococcus aureus subsp. aureus USA300_TCH959 OX=450394 GN=rplS PE=3 SV=1	2	555.283	0.1537	0.00099958	90.05	1
720	GGGVSETFTVR	11	Unmodified	_GGGVSETFTVR_	A0A0E1VS63	50S ribosomal protein L19 (Fragment) OS=Staphylococcus aureus subsp. aureus USA300_TCH959 OX=450394 GN=rplS PE=3 SV=1	2	555.283	2.4431	0.0078947	67.08	1
721	GGGYYVEYR	9	Unmodified	_GGGYYVEYR_	Q99UH2	Aerobic glycerol-3-phosphate dehydrogenase OS=Staphylococcus aureus (strain Mu50 / ATCC 700699) OX=158878 GN=glpD PE=3 SV=2	2	532.246	0.98197	0.00092818	106.6	1
722	GGILVVSAADGPMPQTR	17	Unmodified	_GGILVVSAADGPMPQTR_	Q9EZW7	Elongation factor Tu (Fragment) OS=Staphylococcus aureus OX=1280 GN=tuf PE=4 SV=1	2	834.941	0.64844	0.0066599	57.595	1
723	GGLPETVPAFTVNK	14	Unmodified	_GGLPETVPAFTVNK_	T1Y5Z1	Acetyl-CoA acetyltransferase OS=Staphylococcus aureus subsp. aureus CN1 OX=1193576 GN=SAKOR_00351 PE=3 SV=1	2	715.388	2.4932	0.0080351	59.75	1
724	GGLPNKEPQIQEK	13	Unmodified	_GGLPNKEPQIQEK_	Q6GHP2	Isoleucine--tRNA ligase OS=Staphylococcus aureus (strain MRSA252) OX=282458 GN=ileS PE=3 SV=1	2	719.388	-0.94574	0.0083625	79.089	1
725	GGMWDMDTK	9	Oxidation (M)	_GGM(ox)WDMDTK_	W8TSM8	Formate C-acetyltransferase OS=Staphylococcus aureus OX=1280 GN=pflB PE=4 SV=1	2	528.71	0.44852	0.0013212	91.867	1
726	GGPFIDSLNHR	11	Unmodified	_GGPFIDSLNHR_	A0A6B0BM99	CDP-glycerol glycerophosphotransferase family protein (Fragment) OS=Staphylococcus aureus OX=1280 GN=GO793_17625 PE=4 SV=1	3	404.876	1.1955	0.0080209	51.286	1
727	GGPSTGLPTK	10	Unmodified	_GGPSTGLPTK_	A0A5C8XC52	2-oxoacid:acceptor oxidoreductase subunit alpha (Fragment) OS=Staphylococcus aureus OX=1280 GN=FVP29_00855 PE=4 SV=1	2	457.751	-0.75459	0.0044419	79.201	1
728	GGQFGYVNESK	11	Unmodified	_GGQFGYVNESK_	A0A6B1RH94	Arginine--tRNA ligase OS=Staphylococcus aureus OX=1280 GN=GAY51_04740 PE=4 SV=1	2	593.28	-0.24313	0.0037709	75.819	1
729	GGQVVEGVPVFNTVEEAK	18	Unmodified	_GGQVVEGVPVFNTVEEAK_	T1Y9E2	Succinate--CoA ligase [ADP-forming] subunit alpha OS=Staphylococcus aureus subsp. aureus CN1 OX=1193576 GN=sucD PE=3 SV=1	2	929.981	2.1665	2.4742e-08	110.74	1
730	GGSEIEKLR	9	malon(K)	_GGSEIEK(ma)LR_	T1YAQ4	30S ribosomal protein S3 OS=Staphylococcus aureus subsp. aureus CN1 OX=1193576 GN=rpsC PE=3 SV=1	2	537.775	-1.7517	0.018899	70.942	1
731	GGVFGTTQGLQQQYGEDR	18	Unmodified	_GGVFGTTQGLQQQYGEDR_	A0A2X2JVX0	Branched-chain alpha-keto acid dehydrogenase, E1 component, beta subunit OS=Staphylococcus aureus OX=1280 GN=bfmBAB_1 PE=4 SV=1	2	970.958	-0.40794	1.0843e-12	127.83	1
732	GGVIMDVVNAEQAR	14	Unmodified	_GGVIMDVVNAEQAR_	T1Y826	Pyridoxal 5'-phosphate synthase subunit PdxS OS=Staphylococcus aureus subsp. aureus CN1 OX=1193576 GN=pdxS PE=3 SV=1	2	729.872	0.64907	0.0025762	80.746	1
733	GGYYESSGALK	11	Unmodified	_GGYYESSGALK_	A0A2X2K1I6	Glucose-6-phosphate 1-dehydrogenase OS=Staphylococcus aureus OX=1280 GN=zwf_2 PE=3 SV=1	2	566.269	-0.30756	0.026815	53.237	1
734	GGYYTEGPAANFEMGDR	17	Unmodified	_GGYYTEGPAANFEMGDR_	A0A6B1RS86	FMN-dependent NADH-azoreductase OS=Staphylococcus aureus OX=1280 GN=GAY51_02555 PE=4 SV=1	2	917.889	0.20497	0.00059751	79.837	1
735	GHDPSYLQKAYDLGK	15	malon(K)	_GHDPSYLQK(ma)AYDLGK_	A0A0D1JQA9	Cytokinin riboside 5'-monophosphate phosphoribohydrolase OS=Staphylococcus aureus subsp. aureus OX=46170 GN=QU38_10435 PE=3 SV=1	2	889.423	0.99553	3.5429e-07	111.64	1
736	GHGGYVGEDQIPR	13	Unmodified	_GHGGYVGEDQIPR_	X5E2H8	1,4-dihydroxy-2-naphthoyl-CoA synthase OS=Staphylococcus aureus OX=1280 GN=menB PE=3 SV=1	2	692.834	-0.0087087	0.0011018	88.021	1
737	GHIGDSAETLYNALELEDTLGTK	23	Unmodified	_GHIGDSAETLYNALELEDTLGTK_	Q2G1U3	Oligoendopeptidase F OS=Staphylococcus aureus (strain NCTC 8325) OX=93061 GN=SAOUHSC_00937 PE=3 SV=1	3	816.403	1.4622	2.0042e-18	125.04	1
738	GHNQVVPFR	9	Unmodified	_GHNQVVPFR_	A0A6B5I1G4	Polyglycerol-phosphate lipoteichoic acid synthase LtaS (Fragment) OS=Staphylococcus aureus OX=1280 GN=ltaS PE=4 SV=1	2	527.283	0.36312	2.0556e-05	143.73	1
739	GHTLLIPK	8	Unmodified	_GHTLLIPK_	W8U4X1	Adenosine 5'-monophosphoramidase OS=Staphylococcus aureus OX=1280 GN=hinT PE=4 SV=1	2	439.777		0.00024692	92.47	1
740	GHVGVVSR	8	Unmodified	_GHVGVVSR_	T1Y9E2	Succinate--CoA ligase [ADP-forming] subunit alpha OS=Staphylococcus aureus subsp. aureus CN1 OX=1193576 GN=sucD PE=3 SV=1	2	405.733	1.0251	0.0090088	101.43	1
741	GHVPELYVDNNR	12	Unmodified	_GHVPELYVDNNR_	A0A380E2J5	DnaI OS=Staphylococcus aureus OX=1280 GN=NCTC5664_03681 PE=4 SV=1	3	471.569	-2.3231	0.017769	36.679	1
742	GHVYNGISGGQFK	13	Deamidation (NQ)	_GHVYN(de)GISGGQFK_	Q2G1W5	NERD domain-containing protein OS=Staphylococcus aureus (strain NCTC 8325) OX=93061 GN=SAOUHSC_01908 PE=4 SV=1	3	455.558	1.9918	0.0058563	55.04	1
743	GIDAVIDKDK	10	Unmodified	_GIDAVIDKDK_	Q99UU0	Carbamate kinase 1 OS=Staphylococcus aureus (strain Mu50 / ATCC 700699) OX=158878 GN=arcC1 PE=3 SV=1	3	358.533	0.33006	0.0019267	72.275	1
744	GIDAVIDKDK	10	Unmodified	_GIDAVIDKDK_	Q99UU0	Carbamate kinase 1 OS=Staphylococcus aureus (strain Mu50 / ATCC 700699) OX=158878 GN=arcC1 PE=3 SV=1	2	537.295	0.23635	0.00075271	126.39	1
745	GIEEGAELFYGGPGKPEGLEK	21	Unmodified	_GIEEGAELFYGGPGKPEGLEK_	A0A6B1RRX7	Aldehyde dehydrogenase family protein OS=Staphylococcus aureus OX=1280 GN=GAY51_12455 PE=4 SV=1	3	726.364	0.1689	0.00025851	63.125	1
746	GIEEGAELFYGGPGKPEGLEK	21	Unmodified	_GIEEGAELFYGGPGKPEGLEK_	A0A6B1RRX7	Aldehyde dehydrogenase family protein OS=Staphylococcus aureus OX=1280 GN=GAY51_12455 PE=4 SV=1	2	1089.04	1.0944	0.0084359	55.337	1
747	GIEGLVVIGGDGSYR	15	Unmodified	_GIEGLVVIGGDGSYR_	W8TVL7	ATP-dependent 6-phosphofructokinase OS=Staphylococcus aureus OX=1280 GN=pfkA PE=3 SV=1	2	746.394	-0.79559	1.6473e-11	121.99	1
748	GIEIFNSVDNNYK	13	Unmodified	_GIEIFNSVDNNYK_	A0A6B5EK94	NAD(P)/FAD-dependent oxidoreductase OS=Staphylococcus aureus OX=1280 GN=G0Y82_06660 PE=4 SV=1	2	756.87		0.00069908	56.956	1
749	GIELLNNPFLNK	12	Unmodified	_GIELLNNPFLNK_	A0A6B5T592	NAD-dependent malic enzyme OS=Staphylococcus aureus OX=1280 GN=G0Z16_05940 PE=4 SV=1	2	686.385	-2.0136	0.00058195	90.913	1
750	GIELLNNPFLNK	12	Unmodified	_GIELLNNPFLNK_	A0A6B5T592	NAD-dependent malic enzyme OS=Staphylococcus aureus OX=1280 GN=G0Z16_05940 PE=4 SV=1	2	686.385	0.072961	5.8131e-07	110.84	1
751	GIENGIGNSILIK	13	Unmodified	_GIENGIGNSILIK_	W8USI1	Enolase OS=Staphylococcus aureus OX=1280 GN=eno PE=3 SV=1	2	664.383	-0.31721	0.0037715	71.879	1
752	GIESNFEDLKR	11	Unmodified	_GIESNFEDLKR_	A0A6D1RVK2	Cytidylate kinase OS=Staphylococcus aureus OX=1280 GN=cmk PE=4 SV=1	3	436.558	-3.8761	0.00071986	81.017	1
753	GIIAASAGNHAQGVALTAK	19	Unmodified	_GIIAASAGNHAQGVALTAK_	A0A658B9J9	L-threonine dehydratase catabolic TdcB OS=Staphylococcus aureus OX=1280 GN=DDL17_15820 PE=3 SV=1	3	583.992	-1.3763	1.1098e-06	89.468	1
754	GIIAASAGNHAQGVALTAK	19	Unmodified	_GIIAASAGNHAQGVALTAK_	A0A658B9J9	L-threonine dehydratase catabolic TdcB OS=Staphylococcus aureus OX=1280 GN=DDL17_15820 PE=3 SV=1	3	583.992	-1.662	5.4994e-07	92.39	1
755	GIIAASAGNHAQGVALTAK	19	Unmodified	_GIIAASAGNHAQGVALTAK_	A0A658B9J9	L-threonine dehydratase catabolic TdcB OS=Staphylococcus aureus OX=1280 GN=DDL17_15820 PE=3 SV=1	3	583.992	-1.8454	1.4293e-14	125.73	1
756	GIIAASAGNHAQGVALTAK	19	Unmodified	_GIIAASAGNHAQGVALTAK_	A0A658B9J9	L-threonine dehydratase catabolic TdcB OS=Staphylococcus aureus OX=1280 GN=DDL17_15820 PE=3 SV=1	2	875.484	-1.5239	1.963e-61	196.3	1
757	GIIAASAGNHAQGVALTAK	19	Deamidation (NQ)	_GIIAASAGNHAQ(de)GVALTAK_	A0A658B9J9	L-threonine dehydratase catabolic TdcB OS=Staphylococcus aureus OX=1280 GN=DDL17_15820 PE=3 SV=1	3	584.32	-1.6552	3.2551e-05	79.489	1
758	GIISYEMGSDGTGGK	15	Oxidation (M)	_GIISYEM(ox)GSDGTGGK_	A0A454GWI8	Beta-ketoacyl-[acyl-carrier-protein] synthase III (Fragment) OS=Staphylococcus aureus OX=1280 GN=C7P97_13825 PE=3 SV=1	2	744.338	-0.24927	0.00070825	81.632	1
759	GIKTQVSGR	9	malon(K)	_GIK(ma)TQVSGR_	T1YAQ4	30S ribosomal protein S3 OS=Staphylococcus aureus subsp. aureus CN1 OX=1193576 GN=rpsC PE=3 SV=1	2	516.278		0.00093285	87.568	1
760	GIPTVVGVEK	10	Unmodified	_GIPTVVGVEK_	W8UX29	Pyruvate kinase OS=Staphylococcus aureus OX=1280 GN=pyk PE=3 SV=1	2	499.798	-1.1587	0.014028	64.103	1
761	GIQNMNAEDPSQK	13	Unmodified	_GIQNMNAEDPSQK_	A0A6B0BNZ6	ZinT/AdcA family metal-binding protein (Fragment) OS=Staphylococcus aureus OX=1280 GN=GO793_03720 PE=4 SV=1	2	716.33	1.3503	0.0034028	73.877	1
762	GISFENSNGEWAYK	14	Unmodified	_GISFENSNGEWAYK_	A0A6B0CYL5	Peptidase (Fragment) OS=Staphylococcus aureus OX=1280 GN=GO941_18255 PE=4 SV=1	2	801.365	1.2608	3.2035e-24	168.76	1
763	GISGVTVTLK	10	Unmodified	_GISGVTVTLK_	Q2UWB2	Ser-Asp rich fibrinogen-binding, bone sialoprotein-binding protein (Fragment) OS=Staphylococcus aureus OX=1280 GN=sdrD PE=4 SV=1	2	487.798	2.0015	0.0063732	73.499	1
764	GITAIQMDIK	10	Unmodified	_GITAIQMDIK_	A0A033V7C6	Polyribonucleotide nucleotidyltransferase OS=Staphylococcus aureus C0673 OX=1413510 GN=pnp PE=3 SV=1	2	545.302	-3.8212	0.0010269	93.096	1
765	GITASSLGR	9	Unmodified	_GITASSLGR_	A0A6B0BSI2	CTP synthase (Fragment) OS=Staphylococcus aureus OX=1280 GN=GO793_17275 PE=4 SV=1	2	431.243	1.1908	0.0042786	86.744	1
766	GITINTSHIEYQTDK	15	Deamidation (NQ)	_GITIN(de)TSHIEYQTDK_	W8TRT9	Elongation factor Tu OS=Staphylococcus aureus OX=1280 GN=tufA PE=3 SV=1	3	574.284	0.048431	0.00041353	85.493	1
767	GITINTSHIEYQTDK	15	Unmodified	_GITINTSHIEYQTDK_	W8TRT9	Elongation factor Tu OS=Staphylococcus aureus OX=1280 GN=tufA PE=3 SV=1	3	573.956	-0.61483	0.00014288	90.725	1
768	GITINTSHIEYQTDK	15	Unmodified	_GITINTSHIEYQTDK_	W8TRT9	Elongation factor Tu OS=Staphylococcus aureus OX=1280 GN=tufA PE=3 SV=1	2	860.431	-1.2946	2.0313e-70	226.93	1
769	GITINTSHIEYQTDK	15	Unmodified	_GITINTSHIEYQTDK_	W8TRT9	Elongation factor Tu OS=Staphylococcus aureus OX=1280 GN=tufA PE=3 SV=1	3	573.956	0.98875	0.00032834	83.633	1
770	GITINTSHIEYQTDKR	16	Unmodified	_GITINTSHIEYQTDKR_	W8TRT9	Elongation factor Tu OS=Staphylococcus aureus OX=1280 GN=tufA PE=3 SV=1	4	469.744	-1.6829	0.00030159	95.067	1
771	GITINTSHIEYQTDKR	16	Unmodified	_GITINTSHIEYQTDKR_	W8TRT9	Elongation factor Tu OS=Staphylococcus aureus OX=1280 GN=tufA PE=3 SV=1	3	625.99	1.1835	1.2405e-05	97.45	1
772	GITINTSHIEYQTDKR	16	malon(K)	_GITINTSHIEYQTDK(ma)R_	W8TRT9	Elongation factor Tu OS=Staphylococcus aureus OX=1280 GN=tufA PE=3 SV=1	3	654.657	0.99653	1.6637e-25	163.44	1
773	GITITSAATTAAWEGHR	17	Unmodified	_GITITSAATTAAWEGHR_	W8UT26	Elongation factor G OS=Staphylococcus aureus OX=1280 GN=fusA PE=3 SV=1	3	581.632	1.6883	0.00015301	79.837	1
774	GITITSAATTAAWEGHR	17	Unmodified	_GITITSAATTAAWEGHR_	W8UT26	Elongation factor G OS=Staphylococcus aureus OX=1280 GN=fusA PE=3 SV=1	2	871.945	1.2505	1.2394e-05	102.08	1
775	GITITSAATTAAWEGHR	17	Unmodified	_GITITSAATTAAWEGHR_	W8UT26	Elongation factor G OS=Staphylococcus aureus OX=1280 GN=fusA PE=3 SV=1	3	581.632	0.56901	5.9773e-06	97.235	1
776	GITMNVSQDAK	11	Oxidation (M)	_GITM(ox)NVSQDAK_	A0A6B5I265	ATP-dependent Clp protease ATP-binding subunit OS=Staphylococcus aureus OX=1280 GN=G0X69_04915 PE=4 SV=1	2	590.287	-0.69742	0.0088756	56.551	1
777	GITMNVSQDAK	11	Unmodified	_GITMNVSQDAK_	A0A6B5I265	ATP-dependent Clp protease ATP-binding subunit OS=Staphylococcus aureus OX=1280 GN=G0X69_04915 PE=4 SV=1	2	582.29	0.21071	0.0043022	73.632	1
778	GITTFDLVQNK	11	Unmodified	_GITTFDLVQNK_	W8TSP0	Dipeptidase PepV OS=Staphylococcus aureus OX=1280 GN=sapep PE=4 SV=1	2	618.335	1.9294	0.0028385	79.659	1
779	GIYDSFVEK	9	Unmodified	_GIYDSFVEK_	A0A2S6DT44	Glucokinase OS=Staphylococcus aureus OX=1280 GN=glcK PE=4 SV=1	2	529.264	1.1301	0.0063712	80.688	1
780	GIYPSSANYTTDLHSLGQYVQEGR	24	Unmodified	_GIYPSSANYTTDLHSLGQYVQEGR_	A0A5C8X3S3	Glucose-6-phosphate isomerase (Fragment) OS=Staphylococcus aureus OX=1280 GN=FVP29_16385 PE=3 SV=1	3	886.093	2.3514	1.0207e-40	161.68	1
781	GKFDAVVEDVVEK	13	Unmodified	_GKFDAVVEDVVEK_	A0A6B1RIH8	Preprotein translocase subunit SecA OS=Staphylococcus aureus OX=1280 GN=secA PE=4 SV=1	3	478.921	0.57735	0.0073134	49.298	1
782	GKFDDEGGAAPNNNLR	16	malon(K)	_GK(ma)FDDEGGAAPNNNLR_	A0A6B5INL4	YtxH domain-containing protein (Fragment) OS=Staphylococcus aureus OX=1280 GN=G0Y40_12015 PE=4 SV=1	2	880.895	0.48549	1.5326e-17	139.88	1
783	GKPQIEVTFDIDK	13	Unmodified	_GKPQIEVTFDIDK_	A0A6B5UN24	Molecular chaperone DnaK OS=Staphylococcus aureus OX=1280 GN=dnaK PE=4 SV=1	3	497.268	0.070018	0.00035946	86.756	1
784	GKPQIEVTFDIDK	13	Unmodified	_GKPQIEVTFDIDK_	A0A6B5UN24	Molecular chaperone DnaK OS=Staphylococcus aureus OX=1280 GN=dnaK PE=4 SV=1	2	745.398	0.58782	0.0037502	88.075	1
785	GKQCFVTGR	9	malon(K)	_GK(ma)QCFVTGR_	T1Y7S0	50S ribosomal protein L28 OS=Staphylococcus aureus subsp. aureus CN1 OX=1193576 GN=rpmB PE=3 SV=1	2	569.769	-0.94374	0.0023358	113.99	1
786	GKTGSDLGMDR	11	Oxidation (M),malon(K)	_GK(ma)TGSDLGM(ox)DR_	A0A5C8X571	Uridine monophosphate kinase (Fragment) OS=Staphylococcus aureus OX=1280 GN=FVP29_14200 PE=4 SV=1	2	619.77	-0.89534	0.012747	64.52	1
787	GLAEEQNGVQLMK	13	Oxidation (M)	_GLAEEQNGVQLM(ox)K_	Q6GDJ7	Fructose-bisphosphate aldolase class 1 OS=Staphylococcus aureus (strain MRSA252) OX=282458 GN=fda PE=3 SV=3	2	716.859	4.1591	5.8439e-12	136.7	1
788	GLAEEQNGVQLMK	13	Oxidation (M),Deamidation (NQ)	_GLAEEQN(de)GVQLM(ox)K_	Q6GDJ7	Fructose-bisphosphate aldolase class 1 OS=Staphylococcus aureus (strain MRSA252) OX=282458 GN=fda PE=3 SV=3	2	717.351	1.2184	2.3069e-11	133.05	1
789	GLAGAGEWETLK	12	Unmodified	_GLAGAGEWETLK_	A0A380EL94	Putative methyltransferase OS=Staphylococcus aureus OX=1280 GN=ycgJ_2 PE=4 SV=1	2	616.32		0.0043985	53.448	1
790	GLDATVVTSVAK	12	Unmodified	_GLDATVVTSVAK_	A0A6B1RIE9	Alcohol dehydrogenase AdhP OS=Staphylococcus aureus OX=1280 GN=adhP PE=4 SV=1	2	580.83	-0.86577	0.026626	42.469	1
791	GLDINQLSLEER	12	Unmodified	_GLDINQLSLEER_	T1Y826	Pyridoxal 5'-phosphate synthase subunit PdxS OS=Staphylococcus aureus subsp. aureus CN1 OX=1193576 GN=pdxS PE=3 SV=1	2	693.865	-0.64048	1.7143e-07	121.21	1
792	GLDISGVSHVYNFDIPQDTESYTHR	25	Unmodified	_GLDISGVSHVYNFDIPQDTESYTHR_	A0A6B5SE92	DEAD/DEAH box helicase OS=Staphylococcus aureus OX=1280 GN=G0Y75_11455 PE=4 SV=1	4	713.339	4.3748	0.027771	17.214	1
793	GLDSLNADQLVMLK	14	Oxidation (M)	_GLDSLNADQLVM(ox)LK_	Q6GDJ7	Fructose-bisphosphate aldolase class 1 OS=Staphylococcus aureus (strain MRSA252) OX=282458 GN=fda PE=3 SV=3	2	766.903	-4.0849	0.0012578	79.875	1
794	GLDTQMVQVAENEQHLPFK	19	Unmodified	_GLDTQMVQVAENEQHLPFK_	A0A6B1RF37	Nitric oxide dioxygenase OS=Staphylococcus aureus OX=1280 GN=GAY51_02405 PE=4 SV=1	3	728.697	1.0409	1.6809e-06	86.488	1
795	GLDTQMVQVAENEQHLPFK	19	Unmodified	_GLDTQMVQVAENEQHLPFK_	A0A6B1RF37	Nitric oxide dioxygenase OS=Staphylococcus aureus OX=1280 GN=GAY51_02405 PE=4 SV=1	2	1092.54	-0.963	7.4972e-10	110.74	1
796	GLEDIATMYK	10	Unmodified	_GLEDIATMYK_	A0A6A9GTV7	Catabolite control protein A OS=Staphylococcus aureus OX=1280 GN=ccpA PE=4 SV=1	2	570.784	1.6223	0.014028	64.103	1
797	GLEDIATMYKYHTIISNSDNDSEK	24	Oxidation (M),malon(K)	_GLEDIATM(ox)YK(ma)YHTIISNSDNDSEK_	A0A033V2U0	Catabolite control protein A OS=Staphylococcus aureus C0673 OX=1413510 GN=V070_00793 PE=4 SV=1	3	949.427	2.7774	1.5955e-12	103.84	1
798	GLEGVIAAETK	11	Unmodified	_GLEGVIAAETK_	A0A380EL78	Citrate synthase (Si) OS=Staphylococcus aureus OX=1280 GN=citZ_2 PE=4 SV=1	2	544.303	1.0209	0.015767	59.198	1
799	GLELINR	7	Unmodified	_GLELINR_	A0A033UDT9	Uncharacterized protein OS=Staphylococcus aureus C0673 OX=1413510 GN=V070_02544 PE=4 SV=1	2	407.743	-0.74797	0.00315	126.24	1
800	GLETAVGDEGGFAPK	15	Unmodified	_GLETAVGDEGGFAPK_	W8USI1	Enolase OS=Staphylococcus aureus OX=1280 GN=eno PE=3 SV=1	2	724.357	0.93486	0.00033187	92.939	1
801	GLETAVGDEGGFAPK	15	Unmodified	_GLETAVGDEGGFAPK_	W8USI1	Enolase OS=Staphylococcus aureus OX=1280 GN=eno PE=3 SV=1	3	483.24	-0.74443	0.010773	40.941	1
802	GLETAVGDEGGFAPK	15	Unmodified	_GLETAVGDEGGFAPK_	W8USI1	Enolase OS=Staphylococcus aureus OX=1280 GN=eno PE=3 SV=1	2	724.357	0.99626	1.4499e-05	106.14	1
803	GLETAVGDEGGFAPK	15	Unmodified	_GLETAVGDEGGFAPK_	W8USI1	Enolase OS=Staphylococcus aureus OX=1280 GN=eno PE=3 SV=1	3	483.24	1.8897	0.024781	27.263	1
804	GLEVGQIVESGAEADIK	17	Unmodified	_GLEVGQIVESGAEADIK_	B3VKN3	50S ribosomal protein L2 OS=Staphylococcus aureus OX=1280 GN=rap PE=1 SV=1	3	572.3	0.36672	4.2822e-05	88.427	1
805	GLEVGQIVESGAEADIK	17	Unmodified	_GLEVGQIVESGAEADIK_	B3VKN3	50S ribosomal protein L2 OS=Staphylococcus aureus OX=1280 GN=rap PE=1 SV=1	2	857.947	0.60389	3.5801e-08	114.96	1
806	GLEVGQIVESGAEADIK	17	Unmodified	_GLEVGQIVESGAEADIK_	B3VKN3	50S ribosomal protein L2 OS=Staphylococcus aureus OX=1280 GN=rap PE=1 SV=1	2	857.947	2.9062	4.7096e-08	113.33	1
807	GLFAAGECDFSQHGGNR	17	Unmodified	_GLFAAGECDFSQHGGNR_	A0A5C8X633	Succinate dehydrogenase (Quinone) flavoprotein subunit (Fragment) OS=Staphylococcus aureus OX=1280 GN=sdhA PE=4 SV=1	3	608.269	2.0384	0.00054142	68.978	1
808	GLGEAEIQNMIK	12	Unmodified	_GLGEAEIQNMIK_	A0A6B5L6B0	Hsp33 family molecular chaperone HslO (Fragment) OS=Staphylococcus aureus OX=1280 GN=hslO PE=4 SV=1	2	651.84	2.3866	0.027958	50.275	1
809	GLGHTGGTIDK	11	Unmodified	_GLGHTGGTIDK_	A0A380DXY3	Pyrimidine-nucleoside phosphorylase OS=Staphylococcus aureus OX=1280 GN=pdp PE=3 SV=1	3	352.521		0.027189	30.889	1
810	GLGIQPDLIVVR	12	Unmodified	_GLGIQPDLIVVR_	A0A6B0BSI2	CTP synthase (Fragment) OS=Staphylococcus aureus OX=1280 GN=GO793_17275 PE=4 SV=1	2	640.39	-0.33203	0.00059619	63.473	1
811	GLHVANQASPNAK	13	Unmodified	_GLHVANQASPNAK_	A0A6B5AGB1	DUF1641 domain-containing protein (Fragment) OS=Staphylococcus aureus OX=1280 GN=G0U67_08850 PE=4 SV=1	2	653.847	1.9539	0.0069797	65.043	1
812	GLIDDIDLK	9	Unmodified	_GLIDDIDLK_	A0A380ENS3	Salicylate hydroxylase OS=Staphylococcus aureus OX=1280 GN=NCTC10702_03620 PE=4 SV=1	2	501.279	1.7381	0.021062	62.463	1
813	GLIDESLTCQDK	12	Unmodified	_GLIDESLTCQDK_	Q599I9	RsbU protein OS=Staphylococcus aureus OX=1280 GN=rsbU PE=4 SV=1	2	689.83	0.31403	0.02806	50.222	1
814	GLIEKNNDPYPQELEHTALLIK	22	malon(K)	_GLIEK(ma)NNDPYPQELEHTALLIK_	A0A6B1RNA8	Ferrochelatase OS=Staphylococcus aureus OX=1280 GN=hemH PE=4 SV=1	3	874.453	0.91572	2.2449e-08	87.196	1
815	GLIEMFR	7	Oxidation (M)	_GLIEM(ox)FR_	R4R123	DNA-directed RNA polymerase subunit beta (Fragment) OS=Staphylococcus aureus OX=1280 GN=rpoB PE=3 SV=1	2	441.231	0.99652	0.030698	53.554	1
816	GLIEMFR	7	Unmodified	_GLIEMFR_	R4R123	DNA-directed RNA polymerase subunit beta (Fragment) OS=Staphylococcus aureus OX=1280 GN=rpoB PE=3 SV=1	2	433.234	-1.9219	0.025446	86.086	1
817	GLIYQQTDEQGIEDLLNK	18	Unmodified	_GLIYQQTDEQGIEDLLNK_	W8UX05	Tyrosine--tRNA ligase OS=Staphylococcus aureus OX=1280 GN=tyrS PE=3 SV=1	3	693.02	-1.8445	0.00877	39.338	1
818	GLIYQQTDEQGIEDLLNK	18	Unmodified	_GLIYQQTDEQGIEDLLNK_	W8UX05	Tyrosine--tRNA ligase OS=Staphylococcus aureus OX=1280 GN=tyrS PE=3 SV=1	2	1039.03	-0.53134	0.00031537	56.817	1
819	GLLAIESVR	9	Unmodified	_GLLAIESVR_	W8TSP0	Dipeptidase PepV OS=Staphylococcus aureus OX=1280 GN=sapep PE=4 SV=1	2	479.29	1.4521	0.0019467	95.502	1
820	GLLEQATLQDR	11	Deamidation (NQ)	_GLLEQATLQ(de)DR_	A0A077UL38	Adenine-specific methyltransferase OS=Staphylococcus aureus OX=1280 GN=ERS140147_02455 PE=4 SV=1	2	622.828		0.0010293	64.82	1
821	GLLEQSTLQDR	11	Unmodified	_GLLEQSTLQDR_	Q2FXL4	N6_Mtase domain-containing protein OS=Staphylococcus aureus (strain NCTC 8325) OX=93061 GN=SAOUHSC_01821 PE=4 SV=1	2	630.333	-1.1121	0.0027522	80.014	1
822	GLLEVDK	7	Unmodified	_GLLEVDK_	W8URN4	Dihydrolipoyl dehydrogenase OS=Staphylococcus aureus OX=1280 GN=lpdA PE=3 SV=1	2	387.224	-0.89768	0.026894	81.297	1
823	GLLTSNSVNVLDNK	14	Unmodified	_GLLTSNSVNVLDNK_	A0A6B0BQZ6	Aldo/keto reductase (Fragment) OS=Staphylococcus aureus OX=1280 GN=GO793_06860 PE=4 SV=1	2	737.399		1.3285e-14	95.264	1
824	GLMPNPKTGTVTMDVK	16	malon(K)	_GLMPNPK(ma)TGTVTMDVK_	Q6GJD0	50S ribosomal protein L1 OS=Staphylococcus aureus (strain MRSA252) OX=282458 GN=rplA PE=3 SV=1	2	887.939	-2.2793	0.015681	56.017	1
825	GLNVTIQK	8	Unmodified	_GLNVTIQK_	A0A6B0BSI2	CTP synthase (Fragment) OS=Staphylococcus aureus OX=1280 GN=GO793_17275 PE=4 SV=1	2	436.764	-0.33856	0.019225	75.738	1
826	GLSYEEVCEQTTK	13	Unmodified	_GLSYEEVCEQTTK_	A0A380DKJ0	Deoxyribonuclease YcfH OS=Staphylococcus aureus OX=1280 GN=ycfH_3 PE=4 SV=1	2	772.351	-2.9589	5.0786e-07	109	1
827	GLVDKDTLIK	10	Unmodified	_GLVDKDTLIK_	A0A380ELB0	Glyoxylate reductase / Glyoxylate reductase / Hydroxypyruvate reductase OS=Staphylococcus aureus OX=1280 GN=NCTC10702_03618 PE=3 SV=1	3	367.889	2.5902	0.01707	42.718	1
828	GLVDKDTLIK	10	Unmodified	_GLVDKDTLIK_	A0A380ELB0	Glyoxylate reductase / Glyoxylate reductase / Hydroxypyruvate reductase OS=Staphylococcus aureus OX=1280 GN=NCTC10702_03618 PE=3 SV=1	2	551.329	2.3788	0.007661	87.568	1
829	GLVPIIEPEVNINAK	15	Unmodified	_GLVPIIEPEVNINAK_	Q6GDJ7	Fructose-bisphosphate aldolase class 1 OS=Staphylococcus aureus (strain MRSA252) OX=282458 GN=fda PE=3 SV=3	2	803.464	1.9992	0.0014579	82.069	1
830	GLVPIIEPEVNINAK	15	Deamidation (NQ)	_GLVPIIEPEVNIN(de)AK_	Q6GDJ7	Fructose-bisphosphate aldolase class 1 OS=Staphylococcus aureus (strain MRSA252) OX=282458 GN=fda PE=3 SV=3	2	803.956	0.10804	0.021861	81.904	1
831	GLVPIIEPEVNINAKDK	17	malon(K)	_GLVPIIEPEVNINAK(ma)DK_	Q6GDJ7	Fructose-bisphosphate aldolase class 1 OS=Staphylococcus aureus (strain MRSA252) OX=282458 GN=fda PE=3 SV=3	2	968.025	-2.1772	0.0020071	74.657	1
832	GLWNEDKENEVIER	14	Unmodified	_GLWNEDKENEVIER_	W8TMM6	Pyruvate dehydrogenase E1 component subunit alpha OS=Staphylococcus aureus OX=1280 GN=pdhA PE=4 SV=1	3	577.616	-1.9331	5.5853e-08	115.12	1
833	GLWNEDKENEVIER	14	Unmodified	_GLWNEDKENEVIER_	W8TMM6	Pyruvate dehydrogenase E1 component subunit alpha OS=Staphylococcus aureus OX=1280 GN=pdhA PE=4 SV=1	2	865.921	-1.6442	3.4779e-29	177.88	1
834	GLWNEEKENEVIER	14	malon(K)	_GLWNEEK(ma)ENEVIER_	A0A0U1MY72	Pyruvate dehydrogenase E1 component subunit alpha OS=Staphylococcus aureus OX=1280 GN=pdhA PE=4 SV=1	2	915.929	-1.5005	3.7698e-12	131.66	1
835	GMGSLGAMEK	10	Oxidation (M)	_GMGSLGAM(ox)EK_	A0A5C8X421	Inosine-5'-monophosphate dehydrogenase (Fragment) OS=Staphylococcus aureus OX=1280 GN=guaB PE=3 SV=1	2	498.728	-1.251	0.0012804	85.154	1
836	GMTLNDSHIFVRPDQIK	17	Oxidation (M)	_GM(ox)TLNDSHIFVRPDQIK_	W8TVM8	Threonine--tRNA ligase OS=Staphylococcus aureus OX=1280 GN=thrS PE=3 SV=1	3	663.007	-0.2936	1.8959e-06	104.21	1
837	GMTLNDSHIFVRPDQIK	17	Unmodified	_GMTLNDSHIFVRPDQIK_	W8TVM8	Threonine--tRNA ligase OS=Staphylococcus aureus OX=1280 GN=thrS PE=3 SV=1	4	493.508	-0.55525	0.0051963	46.543	1
838	GMTLNDSHIFVRPDQIK	17	Unmodified	_GMTLNDSHIFVRPDQIK_	W8TVM8	Threonine--tRNA ligase OS=Staphylococcus aureus OX=1280 GN=thrS PE=3 SV=1	3	657.675	-1.0308	7.6334e-06	95.662	1
839	GMTSANPLDFPSYLEK	16	Oxidation (M)	_GM(ox)TSANPLDFPSYLEK_	A0A380E528	Acetyl-coenzyme A carboxylase carboxyl transferase subunit beta OS=Staphylococcus aureus OX=1280 GN=accD PE=3 SV=1	2	893.422	1.5318	0.0021236	65.231	1
840	GMTSANPLDFPSYLEK	16	Unmodified	_GMTSANPLDFPSYLEK_	A0A380E528	Acetyl-coenzyme A carboxylase carboxyl transferase subunit beta OS=Staphylococcus aureus OX=1280 GN=accD PE=3 SV=1	2	885.424	0.16335	3.9687e-05	98.281	1
841	GNDGEDVYLK	10	Unmodified	_GNDGEDVYLK_	W8UY08	Aconitate hydratase OS=Staphylococcus aureus OX=1280 GN=citB PE=3 SV=1	2	555.259	1.4336	0.014028	64.103	1
842	GNDILIDLFGADHHGYINR	19	Unmodified	_GNDILIDLFGADHHGYINR_	A0A6B1RH94	Arginine--tRNA ligase OS=Staphylococcus aureus OX=1280 GN=GAY51_04740 PE=4 SV=1	3	714.024	0.50318	0.0020082	52.185	1
843	GNEALAQEVADQVGIELGK	19	Unmodified	_GNEALAQEVADQVGIELGK_	A0A5C8X2B0	Ribose-phosphate pyrophosphokinase (Fragment) OS=Staphylococcus aureus OX=1280 GN=FVP29_19975 PE=3 SV=1	2	971	1.1864	1.7629e-73	220.34	1
844	GNEALAQEVADQVGIELGK	19	Unmodified	_GNEALAQEVADQVGIELGK_	A0A5C8X2B0	Ribose-phosphate pyrophosphokinase (Fragment) OS=Staphylococcus aureus OX=1280 GN=FVP29_19975 PE=3 SV=1	3	647.669	1.171	3.0723e-08	101.38	1
845	GNEVIVSMNEVEGTPEK	17	Oxidation (M)	_GNEVIVSM(ox)NEVEGTPEK_	W8UX29	Pyruvate kinase OS=Staphylococcus aureus OX=1280 GN=pyk PE=3 SV=1	2	924.438	-0.75211	1.9655e-05	94.281	1
846	GNIAVPLDLPALFK	14	Unmodified	_GNIAVPLDLPALFK_	A0A5C8X4D5	Acyl--CoA ligase (Fragment) OS=Staphylococcus aureus OX=1280 GN=FVP29_15215 PE=4 SV=1	2	734.432	-1.0377	0.0046201	68.972	1
847	GNLEITHSDAQK	12	Unmodified	_GNLEITHSDAQK_	A0A1Q8DB35	HAD family hydrolase OS=Staphylococcus aureus OX=1280 GN=BSZ10_12345 PE=4 SV=1	3	438.221	-0.29656	0.0046945	55.261	1
848	GNLGGVCLNVGCIPSK	16	Unmodified	_GNLGGVCLNVGCIPSK_	W8URN4	Dihydrolipoyl dehydrogenase OS=Staphylococcus aureus OX=1280 GN=lpdA PE=3 SV=1	2	822.913	-2.2552	2.4665e-12	130.21	1
849	GNLGGVCLNVGCIPSK	16	Unmodified	_GNLGGVCLNVGCIPSK_	W8URN4	Dihydrolipoyl dehydrogenase OS=Staphylococcus aureus OX=1280 GN=lpdA PE=3 SV=1	2	822.913	-1.664	0.00048222	84.403	1
850	GNLGGVCLNVGCIPSK	16	Unmodified	_GNLGGVCLNVGCIPSK_	W8URN4	Dihydrolipoyl dehydrogenase OS=Staphylococcus aureus OX=1280 GN=lpdA PE=3 SV=1	3	548.945	-0.99086	0.0053448	47.548	1
851	GNLGGVCLNVGCIPSK	16	Unmodified	_GNLGGVCLNVGCIPSK_	W8URN4	Dihydrolipoyl dehydrogenase OS=Staphylococcus aureus OX=1280 GN=lpdA PE=3 SV=1	2	822.913	-0.45407	0.0012715	78.078	1
852	GNLGGVCLNVGCIPSKALLHASHR	24	malon(K)	_GNLGGVCLNVGCIPSK(ma)ALLHASHR_	W8URN4	Dihydrolipoyl dehydrogenase OS=Staphylococcus aureus OX=1280 GN=lpdA PE=3 SV=1	4	654.834	0.76255	1.6852e-05	66.828	1
853	GNNIGISR	8	Acetyl (Protein N-term),Deamidation (NQ)	_(ac)GNN(de)IGISR_	A0A6B5HX91	Abi family protein (Fragment) OS=Staphylococcus aureus OX=1280 GN=G0V76_00370 PE=4 SV=1	2	437.225	0.78805	0.018289	46.426	1
854	GNPEFTIVNR	10	Unmodified	_GNPEFTIVNR_	A0A1L0UI21	Protoporphyrinogen oxidase OS=Staphylococcus aureus OX=1280 GN=hemY PE=3 SV=1	2	573.799	1.2329	0.0051401	77.14	1
855	GNPTVEVEVLTESGAFGR	18	Unmodified	_GNPTVEVEVLTESGAFGR_	W8USI1	Enolase OS=Staphylococcus aureus OX=1280 GN=eno PE=3 SV=1	3	621.315	-0.8344	4.2361e-05	81.656	1
856	GNPTVEVEVLTESGAFGR	18	Unmodified	_GNPTVEVEVLTESGAFGR_	W8USI1	Enolase OS=Staphylococcus aureus OX=1280 GN=eno PE=3 SV=1	2	931.468	-0.1566	8.1093e-19	142.94	1
857	GNVINPDDIVQSHGADTLR	19	Unmodified	_GNVINPDDIVQSHGADTLR_	P67513	Leucine--tRNA ligase OS=Staphylococcus aureus (strain N315) OX=158879 GN=leuS PE=1 SV=1	3	674.34	-0.18981	5.5432e-08	96.391	1
858	GNVKETIGNVTDNK	14	malon(K)	_GNVK(ma)ETIGNVTDNK_	Q2YWN8	UPF0337 protein SAB0772 OS=Staphylococcus aureus (strain bovine RF122 / ET3-1) OX=273036 GN=SAB0772 PE=3 SV=1	3	525.593	-0.1823	0.013438	46.704	1
859	GNVKETVGNVTDNK	14	malon(K)	_GNVK(ma)ETVGNVTDNK_	A0A6B0AR42	CsbD family protein OS=Staphylococcus aureus OX=1280 GN=GO661_09025 PE=4 SV=1	2	780.879	0.026233	0.0010324	92.427	1
860	GNVKETVGNVTDNK	14	Unmodified	_GNVKETVGNVTDNK_	A0A6B0AR42	CsbD family protein OS=Staphylococcus aureus OX=1280 GN=GO661_09025 PE=4 SV=1	3	492.255		0.00015375	60.55	1
861	GPEKPEKPSRPTHPSGPVNPDNPGLSK	27	Unmodified	_GPEKPEKPSRPTHPSGPVNPDNPGLSK_	A0A6A9GV32	LPXTG cell wall anchor domain-containing protein (Fragment) OS=Staphylococcus aureus OX=1280 GN=GAY51_07405 PE=4 SV=1	5	564.695	-1.4094	8.1011e-07	70.449	1
862	GPFNDNTIK	9	Unmodified	_GPFNDNTIK_	W8U570	3-deoxy-7-phosphoheptulonate synthase OS=Staphylococcus aureus OX=1280 GN=aroA_2 PE=4 SV=1	2	503.254	-4.2624	0.020137	63.216	1
863	GPFVDEHLMK	10	Oxidation (M)	_GPFVDEHLM(ox)K_	Q6GEI7	30S ribosomal protein S19 OS=Staphylococcus aureus (strain MRSA252) OX=282458 GN=rpsS PE=3 SV=1	3	396.862	-1.715	0.0039363	68.847	1
864	GPFVDEHLMK	10	Oxidation (M)	_GPFVDEHLM(ox)K_	Q6GEI7	30S ribosomal protein S19 OS=Staphylococcus aureus (strain MRSA252) OX=282458 GN=rpsS PE=3 SV=1	2	594.79		4.7116e-08	103.01	1
865	GPFVDEHLMK	10	Unmodified	_GPFVDEHLMK_	Q6GEI7	30S ribosomal protein S19 OS=Staphylococcus aureus (strain MRSA252) OX=282458 GN=rpsS PE=3 SV=1	3	391.53	0.34874	0.011491	48.284	1
866	GPIVHEQALVQALK	14	Unmodified	_GPIVHEQALVQALK_	A0A380ELB0	Glyoxylate reductase / Glyoxylate reductase / Hydroxypyruvate reductase OS=Staphylococcus aureus OX=1280 GN=NCTC10702_03618 PE=3 SV=1	3	501.628	2.2373	0.0013712	66.989	1
867	GPIVHEQALVQALK	14	Unmodified	_GPIVHEQALVQALK_	A0A380ELB0	Glyoxylate reductase / Glyoxylate reductase / Hydroxypyruvate reductase OS=Staphylococcus aureus OX=1280 GN=NCTC10702_03618 PE=3 SV=1	2	751.938	2.1207	0.0060751	65.043	1
868	GPIVHEQALVQALK	14	Unmodified	_GPIVHEQALVQALK_	A0A380ELB0	Glyoxylate reductase / Glyoxylate reductase / Hydroxypyruvate reductase OS=Staphylococcus aureus OX=1280 GN=NCTC10702_03618 PE=3 SV=1	3	501.628	1.9677	0.0010065	72.29	1
869	GPLTTPIGGGIR	12	Unmodified	_GPLTTPIGGGIR_	A0A5C8X7X3	Isocitrate dehydrogenase [NADP] (Fragment) OS=Staphylococcus aureus OX=1280 GN=FVP29_09945 PE=4 SV=1	2	569.833	-1.9433	0.00052874	91.469	1
870	GPLTTPIGGGIR	12	Unmodified	_GPLTTPIGGGIR_	A0A5C8X7X3	Isocitrate dehydrogenase [NADP] (Fragment) OS=Staphylococcus aureus OX=1280 GN=FVP29_09945 PE=4 SV=1	2	569.833	-2.0605	0.00093873	87.184	1
871	GPMSHGSHFHR	11	Oxidation (M)	_GPM(ox)SHGSHFHR_	W8U3W0	50S ribosomal protein L3 OS=Staphylococcus aureus OX=1280 GN=rplC PE=1 SV=1	3	422.525	-1.2588	2.4711e-05	104.82	1
872	GPMSHGSHFHR	11	Oxidation (M)	_GPM(ox)SHGSHFHR_	W8U3W0	50S ribosomal protein L3 OS=Staphylococcus aureus OX=1280 GN=rplC PE=1 SV=1	2	633.283	-1.7414	7.5153e-21	173.64	1
873	GPMSHGSHFHR	11	Oxidation (M)	_GPM(ox)SHGSHFHR_	W8U3W0	50S ribosomal protein L3 OS=Staphylococcus aureus OX=1280 GN=rplC PE=1 SV=1	2	633.283	-0.7911	0.005791	62.466	1
874	GPMSHGSHFHR	11	Oxidation (M)	_GPM(ox)SHGSHFHR_	W8U3W0	50S ribosomal protein L3 OS=Staphylococcus aureus OX=1280 GN=rplC PE=1 SV=1	3	422.525	-0.18523	0.016679	48.981	1
875	GPMSHGSHFHR	11	Oxidation (M)	_GPM(ox)SHGSHFHR_	W8U3W0	50S ribosomal protein L3 OS=Staphylococcus aureus OX=1280 GN=rplC PE=1 SV=1	3	422.525		0.0055435	51.286	1
876	GPMSHGSHFHR	11	Unmodified	_GPMSHGSHFHR_	W8U3W0	50S ribosomal protein L3 OS=Staphylococcus aureus OX=1280 GN=rplC PE=1 SV=1	3	417.193		0.0014161	60.255	1
877	GPQAANVVK	9	Unmodified	_GPQAANVVK_	A0A380DRL8	CSD family cold shock protein OS=Staphylococcus aureus OX=1280 GN=cspA PE=4 SV=1	2	442.253		2.3929e-15	118.33	1
878	GPQAANVVK	9	Unmodified	_GPQAANVVK_	A0A380DRL8	CSD family cold shock protein OS=Staphylococcus aureus OX=1280 GN=cspA PE=4 SV=1	2	442.253	-2.0229	0.0055343	82.279	1
879	GPQAANVVK	9	Unmodified	_GPQAANVVK_	A0A380DRL8	CSD family cold shock protein OS=Staphylococcus aureus OX=1280 GN=cspA PE=4 SV=1	2	442.253	-1.293	0.00040096	131.06	1
880	GPQAANVVK	9	Deamidation (NQ)	_GPQAAN(de)VVK_	A0A380DRL8	CSD family cold shock protein OS=Staphylococcus aureus OX=1280 GN=cspA PE=4 SV=1	2	442.745	-2.1778	0.0072657	64.42	1
881	GPQAANVVKL	10	malon(K)	_GPQAANVVK(ma)L_	A0A380DRL8	CSD family cold shock protein OS=Staphylococcus aureus OX=1280 GN=cspA PE=4 SV=1	2	541.796	1.286	0.0088166	66.299	1
882	GQANPQLVNQLLK	13	Unmodified	_GQANPQLVNQLLK_	A0A2Y9TRY4	Aspartyl/glutamyl-tRNA(Asn/Gln) amidotransferase subunit B OS=Staphylococcus aureus OX=1280 GN=gatB PE=3 SV=1	2	711.907	-1.5076	0.0011018	88.021	1
883	GQGVQVVTVFGGMPIER	17	Unmodified	_GQGVQVVTVFGGMPIER_	A0A6B5SE92	DEAD/DEAH box helicase OS=Staphylococcus aureus OX=1280 GN=G0Y75_11455 PE=4 SV=1	2	887.469	1.6687	0.0015895	71.601	1
884	GQIVDETALINALDNK	16	Unmodified	_GQIVDETALINALDNK_	A0A6B1RTN8	D-glycerate dehydrogenase OS=Staphylococcus aureus OX=1280 GN=GAY51_03410 PE=4 SV=1	2	857.455	3.1306	0.0028683	45.618	1
885	GQKGSSAMPHK	11	malon(K)	_GQK(ma)GSSAMPHK_	A0A380DX73	Adenylosuccinate lyase OS=Staphylococcus aureus OX=1280 GN=purB_2 PE=4 SV=1	3	405.193	-1.9463	0.02401	44.366	1
886	GQNVLLEYVSANPTGDLHIGHAR	23	Unmodified	_GQNVLLEYVSANPTGDLHIGHAR_	A0A6B1RH94	Arginine--tRNA ligase OS=Staphylococcus aureus OX=1280 GN=GAY51_04740 PE=4 SV=1	4	616.07	0.22801	1.0419e-14	113.51	1
887	GQVLAAPGSITPHTEFK	17	Unmodified	_GQVLAAPGSITPHTEFK_	W8TRT9	Elongation factor Tu OS=Staphylococcus aureus OX=1280 GN=tufA PE=3 SV=1	3	584.981	1.5586	0.00040704	71.601	1
888	GQVLAAPGSITPHTEFK	17	Unmodified	_GQVLAAPGSITPHTEFK_	W8TRT9	Elongation factor Tu OS=Staphylococcus aureus OX=1280 GN=tufA PE=3 SV=1	3	584.981	0.4182	0.0001667	79.393	1
889	GQVLAAPGSITPHTEFK	17	Unmodified	_GQVLAAPGSITPHTEFK_	W8TRT9	Elongation factor Tu OS=Staphylococcus aureus OX=1280 GN=tufA PE=3 SV=1	2	876.968	-0.55734	5.8375e-08	111.7	1
890	GQVLAAPGSITPHTEFK	17	Unmodified	_GQVLAAPGSITPHTEFK_	W8TRT9	Elongation factor Tu OS=Staphylococcus aureus OX=1280 GN=tufA PE=3 SV=1	3	584.981	0.81076	1.9474e-06	104.21	1
891	GQVLAAPGSITPHTEFK	17	Unmodified	_GQVLAAPGSITPHTEFK_	W8TRT9	Elongation factor Tu OS=Staphylococcus aureus OX=1280 GN=tufA PE=3 SV=1	2	876.968	0.15895	0.0015895	71.601	1
892	GQVLAAPGSITPHTEFK	17	Deamidation (NQ)	_GQ(de)VLAAPGSITPHTEFK_	W8TRT9	Elongation factor Tu OS=Staphylococcus aureus OX=1280 GN=tufA PE=3 SV=1	3	585.309	-0.1214	0.00095681	66.022	1
893	GQVLAAPGSITPHTEFK	17	Deamidation (NQ)	_GQ(de)VLAAPGSITPHTEFK_	W8TRT9	Elongation factor Tu OS=Staphylococcus aureus OX=1280 GN=tufA PE=3 SV=1	3	585.309	-1.2761	4.882e-05	88.385	1
894	GREDNPGIMAASK	13	Oxidation (M)	_GREDNPGIM(ox)AASK_	W8U7S8	Probable malate:quinone oxidoreductase OS=Staphylococcus aureus OX=1280 GN=mqo2 PE=3 SV=1	3	454.554	0.63834	5.869e-05	94.673	1
895	GREDNPGIMAASK	13	Oxidation (M)	_GREDNPGIM(ox)AASK_	W8U7S8	Probable malate:quinone oxidoreductase OS=Staphylococcus aureus OX=1280 GN=mqo2 PE=3 SV=1	2	681.328	0.84597	0.0022928	76.358	1
896	GREDNPGIMAASK	13	Unmodified	_GREDNPGIMAASK_	W8U7S8	Probable malate:quinone oxidoreductase OS=Staphylococcus aureus OX=1280 GN=mqo2 PE=3 SV=1	2	673.33	0.0091654	1.6091e-06	109.83	1
897	GREDNPGIMAASK	13	Unmodified	_GREDNPGIMAASK_	W8U7S8	Probable malate:quinone oxidoreductase OS=Staphylococcus aureus OX=1280 GN=mqo2 PE=3 SV=1	3	449.222	0.50452	0.0019811	65.043	1
898	GRNPQTGKEIEIPASK	16	malon(K)	_GRNPQTGK(ma)EIEIPASK_	A0A1Q8DDZ4	DNA-binding protein OS=Staphylococcus aureus OX=1280 GN=BSZ10_06920 PE=3 SV=1	3	604.315	2.6394	0.0078892	46.892	1
899	GSANYKANNVATDANHSYTSR	21	malon(K)	_GSANYK(ma)ANNVATDANHSYTSR_	W8UWZ6	DUF948 domain-containing protein OS=Staphylococcus aureus OX=1280 GN=ytxG PE=4 SV=1	3	776.348	-0.22774	1.2272e-11	118.54	1
900	GSESGNAIFNHDGVDK	16	Unmodified	_GSESGNAIFNHDGVDK_	T1Y6J4	Aldehyde dehydrogenase B OS=Staphylococcus aureus subsp. aureus CN1 OX=1193576 GN=SAKOR_00147 PE=3 SV=1	3	549.585	0.41112	0.019898	31.04	1
901	GSGFVSHQSISK	12	Unmodified	_GSGFVSHQSISK_	A0A659FND5	Penicillin-binding protein OS=Staphylococcus aureus OX=1280 GN=E3K14_05825 PE=4 SV=1	3	411.879	2.3194	0.028338	25.448	1
902	GSGLILRPDVAAEIIQATK	19	Unmodified	_GSGLILRPDVAAEIIQATK_	A0A380DQ81	tRNA dihydrouridine synthase B OS=Staphylococcus aureus OX=1280 GN=dus_1 PE=4 SV=1	3	651.377	0.63834	8.4889e-11	116.39	1
903	GSKLMEESFEGVK	13	Oxidation (M),malon(K)	_GSK(ma)LM(ox)EESFEGVK_	A0A2X2JYX5	NADH dehydrogenase OS=Staphylococcus aureus OX=1280 GN=NCTC7878_00625 PE=4 SV=1	2	771.853	-0.82407	0.010768	61.962	1
904	GSKLMEESFEGVK	13	malon(K)	_GSK(ma)LMEESFEGVK_	A0A2X2JYX5	NADH dehydrogenase OS=Staphylococcus aureus OX=1280 GN=NCTC7878_00625 PE=4 SV=1	2	763.856	2.2397	0.00027089	97.235	1
905	GSQPLKPLNDSNLR	14	Unmodified	_GSQPLKPLNDSNLR_	A0A6D1RVJ8	Myo-inositol-1(Or 4)-monophosphatase OS=Staphylococcus aureus OX=1280 GN=suhB PE=4 SV=1	3	513.614	-0.37378	0.0023334	59.248	1
906	GSVMNPNDHPHGGGEGR	17	Oxidation (M)	_GSVM(ox)NPNDHPHGGGEGR_	B3VKN3	50S ribosomal protein L2 OS=Staphylococcus aureus OX=1280 GN=rap PE=1 SV=1	4	434.191	-0.3018	0.00020494	94.569	1
907	GSVMNPNDHPHGGGEGR	17	Oxidation (M)	_GSVM(ox)NPNDHPHGGGEGR_	B3VKN3	50S ribosomal protein L2 OS=Staphylococcus aureus OX=1280 GN=rap PE=1 SV=1	3	578.585	0.76828	2.8755e-12	121.82	1
908	GSVMNPNDHPHGGGEGR	17	Unmodified	_GSVMNPNDHPHGGGEGR_	B3VKN3	50S ribosomal protein L2 OS=Staphylococcus aureus OX=1280 GN=rap PE=1 SV=1	4	430.192	-1.8485	1.6919e-06	104.2	1
909	GSVMNPNDHPHGGGEGR	17	Unmodified	_GSVMNPNDHPHGGGEGR_	B3VKN3	50S ribosomal protein L2 OS=Staphylococcus aureus OX=1280 GN=rap PE=1 SV=1	3	573.253	-1.5074	0.0039038	49.595	1
910	GSVMNPNDHPHGGGEGR	17	Oxidation (M),Deamidation (NQ)	_GSVM(ox)N(de)PNDHPHGGGEGR_	B3VKN3	50S ribosomal protein L2 OS=Staphylococcus aureus OX=1280 GN=rap PE=1 SV=1	3	578.913	-1.8797	0.0087288	40.493	1
911	GTAFTNEER	9	Unmodified	_GTAFTNEER_	A0A6B5T592	NAD-dependent malic enzyme OS=Staphylococcus aureus OX=1280 GN=G0Z16_05940 PE=4 SV=1	2	512.738		0.00018102	89.886	1
912	GTDALQNLK	9	Unmodified	_GTDALQNLK_	Q8NVA9	Lipid II:glycine glycyltransferase OS=Staphylococcus aureus (strain MW2) OX=196620 GN=femX PE=3 SV=1	2	480.261	-1.9355	0.0010998	110.41	1
913	GTDGQVLVYHDMLNYGVEHK	20	Unmodified	_GTDGQVLVYHDMLNYGVEHK_	T1YCG5	3-methyl-2-oxobutanoate hydroxymethyltransferase OS=Staphylococcus aureus subsp. aureus CN1 OX=1193576 GN=panB PE=3 SV=1	4	569.526	0.79777	0.0016814	49.188	1
914	GTEITSTFYPK	11	Unmodified	_GTEITSTFYPK_	A0A6B1RF37	Nitric oxide dioxygenase OS=Staphylococcus aureus OX=1280 GN=GAY51_02405 PE=4 SV=1	2	622.314	1.5183	0.00022154	96.229	1
915	GTESQEVINHR	11	Deamidation (NQ)	_GTESQ(de)EVINHR_	A0A2S6DIX2	Guanylate kinase (Fragment) OS=Staphylococcus aureus OX=1280 GN=CSC87_15565 PE=3 SV=1	2	635.805		0.016393	43.297	1
916	GTFASLSELHCDK	13	Unmodified	_GTFASLSELHCDK_	A0A6B0BNK5	Uncharacterized protein OS=Staphylococcus aureus OX=1280 GN=GO793_16175 PE=4 SV=1	3	488.898	0.53216	0.015476	38.14	1
917	GTFIIDPDGVVQASEINADGIGR	23	Unmodified	_GTFIIDPDGVVQASEINADGIGR_	W8U1R6	Alkyl hydroperoxide reductase C OS=Staphylococcus aureus OX=1280 GN=ahpC PE=3 SV=1	3	782.064	1.6799	0.00013026	58.373	1
918	GTGSWNLGEPPHEGTQK	17	Unmodified	_GTGSWNLGEPPHEGTQK_	A0A380ELU8	Low molecular weight protein tyrosine phosphatase OS=Staphylococcus aureus OX=1280 GN=ptpA PE=3 SV=1	3	598.952	0.43483	0.0014874	59.728	1
919	GTNFSPQDPNYDIK	14	Unmodified	_GTNFSPQDPNYDIK_	A0A380DZN3	Ribonucleotide reductase of class III (Anaerobic), large subunit OS=Staphylococcus aureus OX=1280 GN=nrdD_2 PE=4 SV=1	2	798.37	-0.43945	0.00020336	95.195	1
920	GTQASEIVKK	10	malon(K)	_GTQASEIVK(ma)K_	W8TRE5	Adenylate kinase OS=Staphylococcus aureus OX=1280 GN=adk PE=3 SV=1	2	573.804	1.3365	0.0096865	65.295	1
921	GTQDILPEDSK	11	Unmodified	_GTQDILPEDSK_	A0A380DTW2	Histidyl-tRNA synthetase OS=Staphylococcus aureus OX=1280 GN=hisS_3 PE=4 SV=1	2	601.799	1.1567	0.0074717	52.463	1
922	GTTTEDIAQSISPGLR	16	Unmodified	_GTTTEDIAQSISPGLR_	W8TVM8	Threonine--tRNA ligase OS=Staphylococcus aureus OX=1280 GN=thrS PE=3 SV=1	2	823.423	1.5601	1.2508e-58	213.83	1
923	GTTTEDIAQSISPGLR	16	Unmodified	_GTTTEDIAQSISPGLR_	W8TVM8	Threonine--tRNA ligase OS=Staphylococcus aureus OX=1280 GN=thrS PE=3 SV=1	3	549.285	1.58	3.3072e-06	104.55	1
924	GTTTEDIAQSISPGLR	16	Unmodified	_GTTTEDIAQSISPGLR_	W8TVM8	Threonine--tRNA ligase OS=Staphylococcus aureus OX=1280 GN=thrS PE=3 SV=1	3	549.285	2.2265	9.7302e-06	98.676	1
925	GTTTEDIAQSISPGLR	16	Unmodified	_GTTTEDIAQSISPGLR_	W8TVM8	Threonine--tRNA ligase OS=Staphylococcus aureus OX=1280 GN=thrS PE=3 SV=1	2	823.423	2.5985	1.288e-07	109.79	1
926	GTYTMYFDHYAEVPK	15	Oxidation (M)	_GTYTM(ox)YFDHYAEVPK_	W8UT26	Elongation factor G OS=Staphylococcus aureus OX=1280 GN=fusA PE=3 SV=1	2	919.409	-0.66361	0.0025651	64.565	1
927	GTYTMYFDHYAEVPK	15	Unmodified	_GTYTMYFDHYAEVPK_	W8UT26	Elongation factor G OS=Staphylococcus aureus OX=1280 GN=fusA PE=3 SV=1	3	607.943	1.7432	0.0015931	62.861	1
928	GTYTMYFDHYAEVPK	15	Unmodified	_GTYTMYFDHYAEVPK_	W8UT26	Elongation factor G OS=Staphylococcus aureus OX=1280 GN=fusA PE=3 SV=1	2	911.411	0.37118	4.2669e-17	135.81	1
929	GVAFCPHCDGPLFENK	16	Unmodified	_GVAFCPHCDGPLFENK_	A0A6B0D0C8	Alkyl hydroperoxide reductase subunit F (Fragment) OS=Staphylococcus aureus OX=1280 GN=ahpF PE=4 SV=1	3	616.612	0.87258	0.0041519	51.03	1
930	GVAFGAMFSDSEDLMHQK	18	Unmodified	_GVAFGAMFSDSEDLMHQK_	W8TSP0	Dipeptidase PepV OS=Staphylococcus aureus OX=1280 GN=sapep PE=4 SV=1	3	657.298	0.2141	0.0082795	39.91	1
931	GVANIGVK	8	Unmodified	_GVANIGVK_	W8TU08	Riboflavin biosynthesis protein OS=Staphylococcus aureus OX=1280 GN=ribC PE=3 SV=1	2	379.232		0.028489	44.961	1
932	GVANQELTPELAFK	14	Unmodified	_GVANQELTPELAFK_	W8U427	Phosphoglucosamine mutase OS=Staphylococcus aureus OX=1280 GN=glmM PE=3 SV=1	2	758.904	1.728	3.4762e-08	119.25	1
933	GVASSGMICSMK	12	Oxidation (M)	_GVASSGMICSM(ox)K_	A0A5C8X7Y7	Phenylalanine--tRNA ligase beta subunit (Fragment) OS=Staphylococcus aureus OX=1280 GN=FVP29_09825 PE=3 SV=1	2	622.278	-2.0891	0.0038073	64.827	1
934	GVASSGMICSMK	12	Unmodified	_GVASSGMICSMK_	A0A5C8X7Y7	Phenylalanine--tRNA ligase beta subunit (Fragment) OS=Staphylococcus aureus OX=1280 GN=FVP29_09825 PE=3 SV=1	2	614.28	-0.94079	0.023516	52.576	1
935	GVAVVICPNDLLTEK	15	Unmodified	_GVAVVICPNDLLTEK_	A0A3A3AQW1	Pyruvate oxidase OS=Staphylococcus aureus OX=1280 GN=cidC PE=3 SV=1	2	814.44	-2.1644	0.00027682	93.478	1
936	GVDIYYISDR	10	Unmodified	_GVDIYYISDR_	T1Y6B2	Acid phosphatase OS=Staphylococcus aureus subsp. aureus CN1 OX=1193576 GN=SAKOR_00299 PE=4 SV=1	2	600.798		0.00055342	78.683	1
937	GVDQLANAVK	10	Unmodified	_GVDQLANAVK_	A0A6B0BQA0	Chaperonin GroEL (Fragment) OS=Staphylococcus aureus OX=1280 GN=groL PE=4 SV=1	2	507.783	2.8229	0.0070119	71.614	1
938	GVDSFAIQANVADADEVK	18	Unmodified	_GVDSFAIQANVADADEVK_	A0A5C8X7Q8	SDR family NAD(P)-dependent oxidoreductase (Fragment) OS=Staphylococcus aureus OX=1280 GN=FVP29_09105 PE=4 SV=1	2	924.952	-0.34574	0.025103	42.068	1
939	GVEINGAFPR	10	Unmodified	_GVEINGAFPR_	W8TSY7	Aspartate--tRNA ligase OS=Staphylococcus aureus OX=1280 GN=aspS PE=3 SV=1	2	530.283	-2.7398	9.4158e-05	130.66	1
940	GVEIVTEAMAK	11	Oxidation (M)	_GVEIVTEAM(ox)AK_	W8URN4	Dihydrolipoyl dehydrogenase OS=Staphylococcus aureus OX=1280 GN=lpdA PE=3 SV=1	2	582.302	-0.1754	0.00076557	85.813	1
941	GVEIVTEAMAK	11	Oxidation (M)	_GVEIVTEAM(ox)AK_	W8URN4	Dihydrolipoyl dehydrogenase OS=Staphylococcus aureus OX=1280 GN=lpdA PE=3 SV=1	2	582.302	-0.63488	0.007303	59.198	1
942	GVEIVTEAMAK	11	Unmodified	_GVEIVTEAMAK_	W8URN4	Dihydrolipoyl dehydrogenase OS=Staphylococcus aureus OX=1280 GN=lpdA PE=3 SV=1	2	574.305	-0.87251	1.6682e-06	123.51	1
943	GVFNCIQK	8	Unmodified	_GVFNCIQK_	A0A5C8X7Q8	SDR family NAD(P)-dependent oxidoreductase (Fragment) OS=Staphylococcus aureus OX=1280 GN=FVP29_09105 PE=4 SV=1	2	483.247	-1.2928	0.01136	94.262	1
944	GVFNLVNGDGAGVGNPLSEHPK	22	Unmodified	_GVFNLVNGDGAGVGNPLSEHPK_	A0A6B1RRX7	Aldehyde dehydrogenase family protein OS=Staphylococcus aureus OX=1280 GN=GAY51_12455 PE=4 SV=1	3	726.703	1.5743	7.9672e-12	101.17	1
945	GVFNLVNGDGAGVGNPLSEHPK	22	Deamidation (NQ)	_GVFNLVN(de)GDGAGVGNPLSEHPK_	A0A6B1RRX7	Aldehyde dehydrogenase family protein OS=Staphylococcus aureus OX=1280 GN=GAY51_12455 PE=4 SV=1	3	727.031	1.089	1.5024e-11	99.407	1
946	GVFNLVNGDGAGVGNPLSEHPKIR	24	Deamidation (NQ),malon(K)	_GVFNLVN(de)GDGAGVGNPLSEHPK(ma)IR_	A0A077UMT2	Aldehyde dehydrogenase OS=Staphylococcus aureus OX=1280 GN=ERS140147_01910 PE=3 SV=1	3	845.426	2.3338	4.559e-12	98.684	1
947	GVFTEEGGQFEGMFYDK	17	Oxidation (M)	_GVFTEEGGQFEGM(ox)FYDK_	Q6GHP2	Isoleucine--tRNA ligase OS=Staphylococcus aureus (strain MRSA252) OX=282458 GN=ileS PE=3 SV=1	2	978.92	-2.2831	0.002583	60.307	1
948	GVFTEEGGQFEGMFYDK	17	Unmodified	_GVFTEEGGQFEGMFYDK_	Q6GHP2	Isoleucine--tRNA ligase OS=Staphylococcus aureus (strain MRSA252) OX=282458 GN=ileS PE=3 SV=1	2	970.922	0.31364	4.9294e-06	105.39	1
949	GVGDSTDVVQK	11	Unmodified	_GVGDSTDVVQK_	A0A380DTW2	Histidyl-tRNA synthetase OS=Staphylococcus aureus OX=1280 GN=hisS_3 PE=4 SV=1	2	552.78		0.00030951	72.2	1
950	GVGIKNNK	8	malon(K)	_GVGIK(ma)NNK_	W8TVL7	ATP-dependent 6-phosphofructokinase OS=Staphylococcus aureus OX=1280 GN=pfkA PE=3 SV=1	2	458.248	0.61197	0.022921	62.582	1
951	GVHTLGSLATDGYENAR	17	Unmodified	_GVHTLGSLATDGYENAR_	A0A5C8X6X3	Aminotransferase class V-fold PLP-dependent enzyme (Fragment) OS=Staphylococcus aureus OX=1280 GN=FVP29_11185 PE=4 SV=1	3	587.624	-0.62204	2.1387e-08	108.06	1
952	GVHVVIDQSK	10	Unmodified	_GVHVVIDQSK_	Q99UH2	Aerobic glycerol-3-phosphate dehydrogenase OS=Staphylococcus aureus (strain Mu50 / ATCC 700699) OX=158878 GN=glpD PE=3 SV=2	2	541.304	-1.7367	1.6137e-08	154.84	1
953	GVHVVIDQSK	10	Unmodified	_GVHVVIDQSK_	Q99UH2	Aerobic glycerol-3-phosphate dehydrogenase OS=Staphylococcus aureus (strain Mu50 / ATCC 700699) OX=158878 GN=glpD PE=3 SV=2	3	361.205	0.1977	0.0014004	76.17	1
954	GVLENQGAAFNK	12	Unmodified	_GVLENQGAAFNK_	A0A142G9F0	N-acetylmuramoyl-L-alanine amidase OS=Staphylococcus aureus OX=1280 GN=atl PE=4 SV=1	2	624.323	-0.039618	3.3011e-08	131.82	1
955	GVMSLGVGK	9	Unmodified	_GVMSLGVGK_	A0A2X2MDU5	Phosphocarrier protein HPr OS=Staphylococcus aureus OX=1280 GN=ptsH_1 PE=4 SV=1	2	424.239	1.0685	0.016386	66.27	1
956	GVNLPGVR	8	Unmodified	_GVNLPGVR_	W8UX29	Pyruvate kinase OS=Staphylococcus aureus OX=1280 GN=pyk PE=3 SV=1	2	406.243	-0.41526	0.016296	79.116	1
957	GVNPDEVVAMGAAIQGGVITGDVK	24	Unmodified	_GVNPDEVVAMGAAIQGGVITGDVK_	A0A6B5UN24	Molecular chaperone DnaK OS=Staphylococcus aureus OX=1280 GN=dnaK PE=4 SV=1	3	766.398	-0.69959	8.5416e-10	92.886	1
958	GVQMVHESLINALK	14	Unmodified	_GVQMVHESLINALK_	A0A380E4E8	Protein GrpE OS=Staphylococcus aureus OX=1280 GN=grpE PE=3 SV=1	3	513.617	2.0817	0.0085755	43.761	1
959	GVSYCAVCDGAFFK	14	Unmodified	_GVSYCAVCDGAFFK_	Q9KX07	Thioredoxin reductase (Fragment) OS=Staphylococcus aureus OX=1280 PE=3 SV=1	2	790.847	0.60862	0.026414	46.797	1
960	GVTLAQASSK	10	Unmodified	_GVTLAQASSK_	A0A2X2JUG5	50S ribosomal protein L18 OS=Staphylococcus aureus OX=1280 GN=rplR PE=4 SV=1	2	481.269	-0.15483	0.00026551	104.22	1
961	GVTVVAYDNK	10	Unmodified	_GVTVVAYDNK_	Q2UWB2	Ser-Asp rich fibrinogen-binding, bone sialoprotein-binding protein (Fragment) OS=Staphylococcus aureus OX=1280 GN=sdrD PE=4 SV=1	2	533.282	1.122	0.0068132	72.2	1
962	GVVSTMER	8	Oxidation (M)	_GVVSTM(ox)ER_	W8TVM8	Threonine--tRNA ligase OS=Staphylococcus aureus OX=1280 GN=thrS PE=3 SV=1	2	447.721	0.061514	0.028903	47.603	1
963	GVYLGVPTLVNQHGAVK	17	Deamidation (NQ)	_GVYLGVPTLVN(de)QHGAVK_	T1YCW9	L-lactate dehydrogenase OS=Staphylococcus aureus subsp. aureus CN1 OX=1193576 GN=ldh PE=3 SV=1	3	584.993	-1.3016	0.0039193	53.981	1
964	GWEQEAVLR	9	Unmodified	_GWEQEAVLR_	A0A033UTM3	Urocanate hydratase OS=Staphylococcus aureus C0673 OX=1413510 GN=hutU PE=3 SV=1	2	544.28	2.1752	0.0040748	87.476	1
965	GYDIEYSQVDVPDQPSFK	18	Unmodified	_GYDIEYSQVDVPDQPSFK_	A0A2X2K651	ATP synthase gamma chain OS=Staphylococcus aureus OX=1280 GN=atpG PE=4 SV=1	2	1043.98	0.72919	2.5684e-18	137.73	1
966	GYDSAGIAVVNEDNTTVFKEK	21	malon(K)	_GYDSAGIAVVNEDNTTVFK(ma)EK_	A0A6B5B7N3	Glutamine--fructose-6-phosphate transaminase (Isomerizing) OS=Staphylococcus aureus OX=1280 GN=glmS PE=4 SV=1	2	1172.05	-0.51189	3.4842e-07	93.812	1
967	GYDSAGIAVVNEDNTTVFKEK	21	malon(K)	_GYDSAGIAVVNEDNTTVFK(ma)EK_	A0A6B5B7N3	Glutamine--fructose-6-phosphate transaminase (Isomerizing) OS=Staphylococcus aureus OX=1280 GN=glmS PE=4 SV=1	3	781.704	-1.8651	3.3413e-05	74.793	1
968	GYDVVACCLDVGEGK	15	Unmodified	_GYDVVACCLDVGEGK_	Q8NXF2	Argininosuccinate synthase OS=Staphylococcus aureus (strain MW2) OX=196620 GN=argG PE=3 SV=1	2	821.366	0.54839	0.00028235	93.424	1
969	GYEVPELSR	9	Unmodified	_GYEVPELSR_	A0A6B5I2R8	DNA gyrase subunit A OS=Staphylococcus aureus OX=1280 GN=gyrA PE=4 SV=1	2	525.267	1.9469	0.026013	58.433	1
970	GYFVEPTIISGLK	13	Unmodified	_GYFVEPTIISGLK_	A0A6D1RS46	Delta-1-pyrroline-5-carboxylate dehydrogenase OS=Staphylococcus aureus OX=1280 GN=rocA PE=4 SV=1	2	712.395	-1.1634	0.0031979	74.987	1
971	GYGEYFPHR	9	Unmodified	_GYGEYFPHR_	Q99TF5	Uncharacterized peptidase SAV1708 OS=Staphylococcus aureus (strain Mu50 / ATCC 700699) OX=158878 GN=SAV1708 PE=3 SV=2	2	563.259	-1.9773	0.007927	77.732	1
972	GYGYQDFEK	9	Unmodified	_GYGYQDFEK_	A0A380E1M3	FmtA protein involved in methicillin resistance affects cell wall cross-linking and amidation OS=Staphylococcus aureus OX=1280 GN=fmtA_2 PE=4 SV=1	2	553.743	-1.4684	0.011233	71.451	1
973	GYLDDIPVVDITR	13	Unmodified	_GYLDDIPVVDITR_	A0A6D2GXJ7	ATP synthase F0F1 subunit alpha OS=Staphylococcus aureus OX=1280 GN=atpA PE=4 SV=1	2	738.391	0.90242	0.00056384	92.151	1
974	GYNITGVCTSNK	12	Unmodified	_GYNITGVCTSNK_	A0A380DU08	Ribose 5-phosphate isomerase A OS=Staphylococcus aureus OX=1280 GN=rpi PE=4 SV=1	2	657.311	-1.4508	0.0063912	66.989	1
975	GYSAEQMVEELSQDFTNISK	20	Oxidation (M)	_GYSAEQM(ox)VEELSQDFTNISK_	A0A5C8X670	DNA starvation/stationary phase protection protein (Fragment) OS=Staphylococcus aureus OX=1280 GN=FVP29_11790 PE=3 SV=1	3	764.683	-1.2073	0.004503	45.237	1
976	HAGAQVVTASTDSVDFLKPIK	21	Unmodified	_HAGAQVVTASTDSVDFLKPIK_	A0A6B5SY48	Acyl-CoA thioesterase OS=Staphylococcus aureus OX=1280 GN=G0Z07_03655 PE=4 SV=1	3	728.727	2.1784	1.7423e-11	116.09	1
977	HASHLSAEEMAYESLK	16	Oxidation (M)	_HASHLSAEEM(ox)AYESLK_	A0A380EIE8	ATP-dependent protease HslV OS=Staphylococcus aureus OX=1280 GN=clpQ_2 PE=4 SV=1	3	606.949	1.0866	0.0050484	54.859	1
978	HATPYSPTTVR	11	Unmodified	_HATPYSPTTVR_	T1Y5L6	L-lactate dehydrogenase OS=Staphylococcus aureus subsp. aureus CN1 OX=1193576 GN=ldh PE=3 SV=1	2	615.317	-0.38865	0.0015949	86.189	1
979	HATPYSPTTVR	11	Unmodified	_HATPYSPTTVR_	T1Y5L6	L-lactate dehydrogenase OS=Staphylococcus aureus subsp. aureus CN1 OX=1193576 GN=ldh PE=3 SV=1	3	410.547	0.64933	0.016318	39.58	1
980	HATPYSPTTVR	11	Unmodified	_HATPYSPTTVR_	T1Y5L6	L-lactate dehydrogenase OS=Staphylococcus aureus subsp. aureus CN1 OX=1193576 GN=ldh PE=3 SV=1	2	615.317	0.64559	0.0068433	68.132	1
981	HCALQVYAEHYPIVGENLLK	20	Unmodified	_HCALQVYAEHYPIVGENLLK_	A0A6B1RF37	Nitric oxide dioxygenase OS=Staphylococcus aureus OX=1280 GN=GAY51_02405 PE=4 SV=1	4	589.304	1.9566	0.0057496	38.377	1
982	HCALQVYAEHYPIVGENLLK	20	Unmodified	_HCALQVYAEHYPIVGENLLK_	A0A6B1RF37	Nitric oxide dioxygenase OS=Staphylococcus aureus OX=1280 GN=GAY51_02405 PE=4 SV=1	3	785.404	1.6621	3.4955e-37	163.16	1
983	HDELQSTVENVKDELYLSSK	20	Unmodified	_HDELQSTVENVKDELYLSSK_	A0A6B5H121	DNA repair protein Rad50 OS=Staphylococcus aureus OX=1280 GN=G0Z13_13675 PE=4 SV=1	3	778.72	-0.26075	2.3956e-20	136.68	1
984	HDFSGYITETLK	12	Unmodified	_HDFSGYITETLK_	A0A6B0BUT7	Methylenetetrahydrofolate--tRNA-(Uracil(54)-C(5))-methyltransferase (FADH(2)-oxidizing) TrmFO (Fragment) OS=Staphylococcus aureus OX=1280 GN=GO793_12680 PE=4 SV=1	3	470.902	-0.27506	0.0048037	55.04	1
985	HDFSGYITETLK	12	Unmodified	_HDFSGYITETLK_	A0A6B0BUT7	Methylenetetrahydrofolate--tRNA-(Uracil(54)-C(5))-methyltransferase (FADH(2)-oxidizing) TrmFO (Fragment) OS=Staphylococcus aureus OX=1280 GN=GO793_12680 PE=4 SV=1	2	705.849	2.7702	0.0096886	63.091	1
986	HDLPVYQPEK	10	Unmodified	_HDLPVYQPEK_	A0A6A9GYE6	Methionyl-tRNA formyltransferase OS=Staphylococcus aureus OX=1280 GN=GAY51_11730 PE=4 SV=1	2	613.314	1.2104	0.00029602	103.43	1
987	HDTNDSKNK	9	Unmodified	_HDTNDSKNK_	A0A0U1MDU5	N-acetylmuramoyl-L-alanine amidase domain-containing protein OS=Staphylococcus aureus OX=1280 GN=SAMEA2445518_01848 PE=4 SV=1	2	529.747	-0.82544	0.0031534	106.68	1
988	HEEVASLAAAGYTK	14	Unmodified	_HEEVASLAAAGYTK_	A0A3A3AQW1	Pyruvate oxidase OS=Staphylococcus aureus OX=1280 GN=cidC PE=3 SV=1	3	482.912	-3.605	0.029643	22.855	1
989	HEKLELPASNIK	12	malon(K)	_HEK(ma)LELPASNIK_	W8U8T8	30S ribosomal protein S8 OS=Staphylococcus aureus OX=1280 GN=rpsH PE=1 SV=1	2	732.888	-1.9433	1.7553e-07	126.16	1
990	HFAEELLNGYK	11	Unmodified	_HFAEELLNGYK_	T1Y978	Universal stress protein OS=Staphylococcus aureus subsp. aureus CN1 OX=1193576 GN=SAKOR_01651 PE=3 SV=1	2	660.833	0.79225	4.2138e-15	168.3	1
991	HFAEELLNGYK	11	Unmodified	_HFAEELLNGYK_	T1Y978	Universal stress protein OS=Staphylococcus aureus subsp. aureus CN1 OX=1193576 GN=SAKOR_01651 PE=3 SV=1	3	440.891	2.5245	5.7163e-05	96.143	1
992	HFAEELLNGYK	11	Unmodified	_HFAEELLNGYK_	T1Y978	Universal stress protein OS=Staphylococcus aureus subsp. aureus CN1 OX=1193576 GN=SAKOR_01651 PE=3 SV=1	2	660.833	3.657	0.0066202	68.355	1
993	HFAEELLNGYK	11	Deamidation (NQ)	_HFAEELLN(de)GYK_	T1Y978	Universal stress protein OS=Staphylococcus aureus subsp. aureus CN1 OX=1193576 GN=SAKOR_01651 PE=3 SV=1	2	661.325	-2.1308	4.0521e-07	143.97	1
994	HFAEELLNGYK	11	Deamidation (NQ)	_HFAEELLN(de)GYK_	T1Y978	Universal stress protein OS=Staphylococcus aureus subsp. aureus CN1 OX=1193576 GN=SAKOR_01651 PE=3 SV=1	3	441.219	1.3607	0.00056242	86.898	1
995	HFDIPTLVICTK	12	Unmodified	_HFDIPTLVICTK_	A0A6D1S2G8	GTP-binding protein EngB OS=Staphylococcus aureus OX=1280 GN=engB PE=4 SV=1	3	481.927	1.3995	0.002481	63.091	1
996	HFDIPTLVICTK	12	Unmodified	_HFDIPTLVICTK_	A0A6D1S2G8	GTP-binding protein EngB OS=Staphylococcus aureus OX=1280 GN=engB PE=4 SV=1	2	722.387	1.6016	0.0017981	60.161	1
997	HFGLQDK	7	Unmodified	_HFGLQDK_	A0A6B5DIH9	Glycine C-acetyltransferase OS=Staphylococcus aureus OX=1280 GN=G0Y59_09165 PE=4 SV=1	2	422.719	-0.48558	0.00019381	136.11	1
998	HFGSTVYTVNDK	12	Unmodified	_HFGSTVYTVNDK_	A0A380DRY9	Esterase/lipase OS=Staphylococcus aureus OX=1280 GN=mlhB_1 PE=4 SV=1	3	456.558	-0.26476	0.0037628	57.175	1
999	HFGSVDPIEGTKPTTK	16	Unmodified	_HFGSVDPIEGTKPTTK_	A0A380DIE9	GTP cyclohydrolase I type 2 OS=Staphylococcus aureus OX=1280 GN=folE2_1 PE=4 SV=1	3	571.965	0.56491	2.0959e-08	114.21	1
1000	HFLNNVCTHIADLDFGK	17	Unmodified	_HFLNNVCTHIADLDFGK_	W8TWE8	ABC efflux transporter (ATP-binding protein) OS=Staphylococcus aureus OX=1280 GN=ykpA PE=4 SV=1	3	667.66	-1.0633	5.5906e-06	97.904	1
1001	HFNDVSSSNK	10	Unmodified	_HFNDVSSSNK_	A0A380EQ52	N-carbamoylsarcosine amidase OS=Staphylococcus aureus OX=1280 GN=NCTC10702_04097 PE=4 SV=1	2	567.762	-2.1123	1.6649e-13	169.52	1
1002	HFNIPIEAEGLSITTTPEAIR	21	Unmodified	_HFNIPIEAEGLSITTTPEAIR_	A0A6B0BBA5	3-phosphoshikimate 1-carboxyvinyltransferase (Fragment) OS=Staphylococcus aureus OX=1280 GN=GO706_01755 PE=4 SV=1	3	770.409	2.3017	1.1911e-07	92.098	1
1003	HFNQIQTK	8	Unmodified	_HFNQIQTK_	A0A380EP06	D-lactate dehydrogenase OS=Staphylococcus aureus OX=1280 GN=ldhD_2 PE=4 SV=1	2	508.27	2.8504	0.010644	96.668	1
1004	HFQETANGLIK	11	Unmodified	_HFQETANGLIK_	A0A2X2K737	N-acetylglucosamine-6-phosphate deacetylase OS=Staphylococcus aureus OX=1280 GN=nagA_2 PE=4 SV=1	2	629.333	1.5052	3.6797e-10	151.13	1
1005	HFQSEDVK	8	Unmodified	_HFQSEDVK_	A0A2X2K1I6	Glucose-6-phosphate 1-dehydrogenase OS=Staphylococcus aureus OX=1280 GN=zwf_2 PE=3 SV=1	2	495.238		4.2845e-09	107.21	1
1006	HFYTNDVR	8	Unmodified	_HFYTNDVR_	W8TMJ0	Phenylalanine--tRNA ligase alpha subunit OS=Staphylococcus aureus OX=1280 GN=pheS PE=3 SV=1	2	526.251	0.50575	0.011034	95.531	1
1007	HGDKILLPVDTK	12	malon(K)	_HGDK(ma)ILLPVDTK_	A0A6C1EUG3	Phosphoglycerate kinase OS=Staphylococcus aureus OX=1280 GN=GZ067_05860 PE=4 SV=1	3	474.593	0.54717	0.017686	46.643	1
1008	HGDKILLPVDTK	12	malon(K)	_HGDK(ma)ILLPVDTK_	A0A6C1EUG3	Phosphoglycerate kinase OS=Staphylococcus aureus OX=1280 GN=GZ067_05860 PE=4 SV=1	2	711.385	1.429	2.9628e-07	120.53	1
1009	HGDPQFEGQTK	11	Unmodified	_HGDPQFEGQTK_	A0A222UAJ5	Gyrase subunit B (Fragment) OS=Staphylococcus aureus OX=1280 GN=gyrB PE=4 SV=1	2	622.289	0.75356	6.5574e-05	104.24	1
1010	HGDPQFEGQTK	11	Unmodified	_HGDPQFEGQTK_	A0A222UAJ5	Gyrase subunit B (Fragment) OS=Staphylococcus aureus OX=1280 GN=gyrB PE=4 SV=1	3	415.195		0.0055425	50.786	1
1011	HGLGIGGDGDPWFVVGK	17	Unmodified	_HGLGIGGDGDPWFVVGK_	A0A2X2K1Y0	tRNA-specific 2-thiouridylase MnmA OS=Staphylococcus aureus OX=1280 GN=mnmA PE=3 SV=1	3	570.958	0.37084	0.025678	24.706	1
1012	HGMTPIICVGETDEER	16	Oxidation (M)	_HGM(ox)TPIICVGETDEER_	A0A6B1RNF5	Triose-phosphate isomerase OS=Staphylococcus aureus OX=1280 GN=GAY51_03870 PE=4 SV=1	3	620.614	0.76268	0.0028613	61.265	1
1013	HGMTPIICVGETDEER	16	Oxidation (M)	_HGM(ox)TPIICVGETDEER_	A0A6B1RNF5	Triose-phosphate isomerase OS=Staphylococcus aureus OX=1280 GN=GAY51_03870 PE=4 SV=1	2	930.417	1.1184	0.00031416	81.656	1
1014	HGMTPIICVGETDEER	16	Unmodified	_HGMTPIICVGETDEER_	A0A6B1RNF5	Triose-phosphate isomerase OS=Staphylococcus aureus OX=1280 GN=GAY51_03870 PE=4 SV=1	3	615.282	-0.068977	2.881e-06	104.94	1
1015	HGMTPIICVGETDEER	16	Unmodified	_HGMTPIICVGETDEER_	A0A6B1RNF5	Triose-phosphate isomerase OS=Staphylococcus aureus OX=1280 GN=GAY51_03870 PE=4 SV=1	2	922.419	-0.50229	1.0658e-18	144.73	1
1016	HGQSEWNAK	9	Unmodified	_HGQSEWNAK_	A0A133QCU1	2,3-bisphosphoglycerate-dependent phosphoglycerate mutase (Fragment) OS=Staphylococcus aureus OX=1280 GN=HMPREF3211_00061 PE=3 SV=1	2	528.747	3.4478	1.6999e-06	145.23	1
1017	HGQSEWNAK	9	Unmodified	_HGQSEWNAK_	A0A133QCU1	2,3-bisphosphoglycerate-dependent phosphoglycerate mutase (Fragment) OS=Staphylococcus aureus OX=1280 GN=HMPREF3211_00061 PE=3 SV=1	3	352.833	0.31667	0.019531	39.622	1
1018	HGQSEWNAK	9	Unmodified	_HGQSEWNAK_	A0A133QCU1	2,3-bisphosphoglycerate-dependent phosphoglycerate mutase (Fragment) OS=Staphylococcus aureus OX=1280 GN=HMPREF3211_00061 PE=3 SV=1	2	528.747	0.30745	3.7214e-08	156.16	1
1019	HGQSEWNAK	9	Unmodified	_HGQSEWNAK_	A0A133QCU1	2,3-bisphosphoglycerate-dependent phosphoglycerate mutase (Fragment) OS=Staphylococcus aureus OX=1280 GN=HMPREF3211_00061 PE=3 SV=1	2	528.747	-1.587	0.0042357	86.898	1
1020	HGTIALIEEGTPVVGLATQEK	21	Unmodified	_HGTIALIEEGTPVVGLATQEK_	A0A6B5B7N3	Glutamine--fructose-6-phosphate transaminase (Isomerizing) OS=Staphylococcus aureus OX=1280 GN=glmS PE=4 SV=1	3	721.727	-0.32832	2.524e-07	88.574	1
1021	HGTIALIEEGTPVVGLATQEK	21	Unmodified	_HGTIALIEEGTPVVGLATQEK_	A0A6B5B7N3	Glutamine--fructose-6-phosphate transaminase (Isomerizing) OS=Staphylococcus aureus OX=1280 GN=glmS PE=4 SV=1	2	1082.09	-0.66543	5.3681e-15	129.2	1
1022	HGVNISK	7	Unmodified	_HGVNISK_	A0A6B5IW32	Asp23/Gls24 family envelope stress response protein (Fragment) OS=Staphylococcus aureus OX=1280 GN=G0Y39_11460 PE=4 SV=1	2	377.714	-2.3079	0.017719	106.36	1
1023	HGVNISKTANK	11	malon(K)	_HGVNISK(ma)TANK_	A0A6B5IW32	Asp23/Gls24 family envelope stress response protein (Fragment) OS=Staphylococcus aureus OX=1280 GN=G0Y39_11460 PE=4 SV=1	3	418.886		0.0049182	54.309	1
1024	HHNTYVTK	8	Unmodified	_HHNTYVTK_	W8UU58	Superoxide dismutase OS=Staphylococcus aureus OX=1280 GN=sodA PE=3 SV=1	2	500.254	-1.5302	0.031415	63.419	1
1025	HHNTYVTKLNAAVEGTDLESK	21	malon(K)	_HHNTYVTK(ma)LNAAVEGTDLESK_	E9LJ88	Superoxide dismutase A (Fragment) OS=Staphylococcus aureus OX=1280 GN=sodA PE=4 SV=1	4	604.046	1.1598	2.1028e-09	105.24	1
1026	HHNTYVTKLNAAVEGTDLESK	21	malon(K)	_HHNTYVTK(ma)LNAAVEGTDLESK_	E9LJ88	Superoxide dismutase A (Fragment) OS=Staphylococcus aureus OX=1280 GN=sodA PE=4 SV=1	3	805.059	0.82352	0.00029996	65.741	1
1027	HHTEVLENPDNISK	14	Unmodified	_HHTEVLENPDNISK_	A0A2X2K1B6	Uncharacterized protein conserved in bacteria OS=Staphylococcus aureus OX=1280 GN=NCTC7878_01399 PE=4 SV=1	3	544.937	0.18178	1.0692e-17	139.74	1
1028	HHTEVLENPDNISK	14	Unmodified	_HHTEVLENPDNISK_	A0A2X2K1B6	Uncharacterized protein conserved in bacteria OS=Staphylococcus aureus OX=1280 GN=NCTC7878_01399 PE=4 SV=1	2	816.902		0.00010793	65.467	1
1029	HHTEVLENPDNISK	14	Unmodified	_HHTEVLENPDNISK_	A0A2X2K1B6	Uncharacterized protein conserved in bacteria OS=Staphylococcus aureus OX=1280 GN=NCTC7878_01399 PE=4 SV=1	3	544.937	-1.4772	0.027306	25.328	1
1030	HIANEVLGSAK	11	Unmodified	_HIANEVLGSAK_	Q8NXZ0	Lysine--tRNA ligase OS=Staphylococcus aureus (strain MW2) OX=196620 GN=lysS PE=3 SV=1	2	569.814	-0.52487	0.0051625	70.089	1
1031	HIANEVLGSAK	11	Unmodified	_HIANEVLGSAK_	Q8NXZ0	Lysine--tRNA ligase OS=Staphylococcus aureus (strain MW2) OX=196620 GN=lysS PE=3 SV=1	3	380.212	-0.59668	0.001701	59.265	1
1032	HIDLFENYIPVIDK	14	Unmodified	_HIDLFENYIPVIDK_	A0A6B1RS86	FMN-dependent NADH-azoreductase OS=Staphylococcus aureus OX=1280 GN=GAY51_02555 PE=4 SV=1	3	572.638	-2.3636	0.00028636	89.507	1
1033	HIDLFENYIPVIDK	14	Unmodified	_HIDLFENYIPVIDK_	A0A6B1RS86	FMN-dependent NADH-azoreductase OS=Staphylococcus aureus OX=1280 GN=GAY51_02555 PE=4 SV=1	2	858.454	-1.3533	0.0024344	81.632	1
1034	HIDVLYTFGNEAK	13	Unmodified	_HIDVLYTFGNEAK_	A0A380DVC9	UDP-N-acetylmuramoyl-tripeptide--D-alanyl-D-alanine ligase OS=Staphylococcus aureus OX=1280 GN=murF_2 PE=4 SV=1	2	753.883	-3.4832	0.00057848	92.039	1
1035	HIEDKFANYAASK	13	malon(K)	_HIEDK(ma)FANYAASK_	A0A2X2JYX5	NADH dehydrogenase OS=Staphylococcus aureus OX=1280 GN=NCTC7878_00625 PE=4 SV=1	2	790.373	0.93298	2.2221e-07	117.18	1
1036	HIEEEVIKQ	9	Unmodified	_HIEEEVIKQ_	A0A6B5U8R7	Septation ring formation regulator EzrA OS=Staphylococcus aureus OX=1280 GN=ezrA PE=4 SV=1	2	562.801	0.89256	0.0026597	71.425	1
1037	HIESTNGVNEDDVIVTHDAVR	21	Unmodified	_HIESTNGVNEDDVIVTHDAVR_	A0A077U2A0	Ribitol-5-phosphate cytidylyltransferase OS=Staphylococcus aureus OX=1280 GN=ispD2 PE=3 SV=1	4	580.785	-1.4893	0.028927	16.593	1
1038	HIETKPQLAEANTLTYGTR	19	Unmodified	_HIETKPQLAEANTLTYGTR_	A0A380DU87	Opine dehydrogenase OS=Staphylococcus aureus OX=1280 GN=odh PE=4 SV=1	3	715.043	0.95393	9.9823e-37	159.4	1
1039	HIFNSETDPITLIK	14	Unmodified	_HIFNSETDPITLIK_	A0A380EGW3	Phosphate transport regulator, putative OS=Staphylococcus aureus OX=1280 GN=NCTC10702_01131 PE=4 SV=1	2	814.438	-2.5514	2.0242e-23	159.22	1
1040	HIFYLSNIENNVR	13	Unmodified	_HIFYLSNIENNVR_	T1YBK5	Hydroxymethylglutaryl-CoA synthase OS=Staphylococcus aureus subsp. aureus CN1 OX=1193576 GN=SAKOR_02536 PE=4 SV=1	2	809.92	2.2582	0.0038308	71.558	1
1041	HIGAALPK	8	Unmodified	_HIGAALPK_	W8U4X1	Adenosine 5'-monophosphoramidase OS=Staphylococcus aureus OX=1280 GN=hinT PE=4 SV=1	2	403.748	0.04756	0.014406	81.297	1
1043	HIGTPGEVLEPGQQVNVK	18	Unmodified	_HIGTPGEVLEPGQQVNVK_	Q6GGT5	30S ribosomal protein S1 OS=Staphylococcus aureus (strain MRSA252) OX=282458 GN=rpsA PE=3 SV=1	3	634.674	-0.18094	2.6473e-13	128.06	1
1044	HIGTPGEVLEPGQQVNVK	18	Unmodified	_HIGTPGEVLEPGQQVNVK_	Q6GGT5	30S ribosomal protein S1 OS=Staphylococcus aureus (strain MRSA252) OX=282458 GN=rpsA PE=3 SV=1	2	951.508	-0.55015	6.3883e-78	230.82	1
1045	HIGTPGEVLEPGQQVNVK	18	Unmodified	_HIGTPGEVLEPGQQVNVK_	Q6GGT5	30S ribosomal protein S1 OS=Staphylococcus aureus (strain MRSA252) OX=282458 GN=rpsA PE=3 SV=1	3	634.674	0.11589	1.0121e-13	130.95	1
1046	HIGTPGEVLEPGQQVNVK	18	Unmodified	_HIGTPGEVLEPGQQVNVK_	Q6GGT5	30S ribosomal protein S1 OS=Staphylococcus aureus (strain MRSA252) OX=282458 GN=rpsA PE=3 SV=1	3	634.674	0.37555	0.00024591	70.451	1
1047	HIIGSTNPSEASPGSIR	17	Unmodified	_HIIGSTNPSEASPGSIR_	A0A6B1RQ26	Nucleoside-diphosphate kinase OS=Staphylococcus aureus OX=1280 GN=GAY51_08490 PE=4 SV=1	3	574.964	-0.58455	0.0010831	63.681	1
1048	HIIGSTNPSEASPGSIR	17	Unmodified	_HIIGSTNPSEASPGSIR_	A0A6B1RQ26	Nucleoside-diphosphate kinase OS=Staphylococcus aureus OX=1280 GN=GAY51_08490 PE=4 SV=1	2	861.942	-0.33659	0.01237	52.172	1
1049	HIPSEYTER	9	Unmodified	_HIPSEYTER_	A0A6B0CMV4	GTP-sensing pleiotropic transcriptional regulator CodY (Fragment) OS=Staphylococcus aureus OX=1280 GN=codY PE=4 SV=1	2	566.275	0.21757	0.0183	64.711	1
1050	HIPSEYTER	9	Unmodified	_HIPSEYTER_	A0A6B0CMV4	GTP-sensing pleiotropic transcriptional regulator CodY (Fragment) OS=Staphylococcus aureus OX=1280 GN=codY PE=4 SV=1	3	377.852	-0.48827	0.022772	35.269	1
1051	HIQTPGSEITDTR	13	Unmodified	_HIQTPGSEITDTR_	A0A5C8X549	Nitrate reductase subunit alpha (Fragment) OS=Staphylococcus aureus OX=1280 GN=FVP29_14645 PE=4 SV=1	3	485.579	1.0552	0.00024178	89.231	1
1052	HIQTPGSEITDTR	13	Unmodified	_HIQTPGSEITDTR_	A0A5C8X549	Nitrate reductase subunit alpha (Fragment) OS=Staphylococcus aureus OX=1280 GN=FVP29_14645 PE=4 SV=1	2	727.865	1.0087	0.0052067	67.997	1
1053	HISLIADVFK	10	Unmodified	_HISLIADVFK_	W8U472	ATP synthase subunit delta OS=Staphylococcus aureus OX=1280 GN=atpH PE=3 SV=1	2	571.832	-1.5019	0.00015588	107.06	1
1054	HISLIADVFK	10	Unmodified	_HISLIADVFK_	W8U472	ATP synthase subunit delta OS=Staphylococcus aureus OX=1280 GN=atpH PE=3 SV=1	3	381.557	0.30941	0.017129	42.336	1
1055	HISLIADVFK	10	Unmodified	_HISLIADVFK_	W8U472	ATP synthase subunit delta OS=Staphylococcus aureus OX=1280 GN=atpH PE=3 SV=1	2	571.832	0.52717	0.001478	72.2	1
1056	HIYAAGDCIGK	11	Unmodified	_HIYAAGDCIGK_	A0A380E327	Dihydrolipoamide dehydrogenase of branched-chain alpha-keto acid dehydrogenase OS=Staphylococcus aureus OX=1280 GN=sthA PE=4 SV=1	2	602.793		1.7035e-13	108.7	1
1057	HIYAQIIDDNK	11	Unmodified	_HIYAQIIDDNK_	A0A2X2JUG5	50S ribosomal protein L18 OS=Staphylococcus aureus OX=1280 GN=rplR PE=4 SV=1	3	443.898		0.00089284	63.624	1
1058	HIYAQIIDDNKGVTLAQASSK	21	malon(K)	_HIYAQIIDDNK(ma)GVTLAQASSK_	A0A2X2JUG5	50S ribosomal protein L18 OS=Staphylococcus aureus OX=1280 GN=rplR PE=4 SV=1	3	786.736	1.9795	5.6881e-09	104.53	1
1059	HIYNQFINSK	10	Unmodified	_HIYNQFINSK_	A0A659IAS8	Type I glutamate--ammonia ligase OS=Staphylococcus aureus OX=1280 GN=glnA PE=3 SV=1	2	632.328	-1.4582	0.015695	62.633	1
1060	HKDVVELR	8	malon(K)	_HK(ma)DVVELR_	A0A6B5K1Z1	ADP-forming succinate--CoA ligase subunit beta OS=Staphylococcus aureus OX=1280 GN=sucC PE=4 SV=1	3	361.193	-1.2951	0.029537	49.189	1
1061	HKNYNKADAK	10	Deamidation (NQ)	_HKNYN(de)KADAK_	A0A1Q8DC02	Peptide ABC transporter ATP-binding protein OS=Staphylococcus aureus OX=1280 GN=BSZ10_10715 PE=3 SV=1	3	397.204	-0.76565	0.015413	44.318	1
1062	HLDLFTDQEK	10	Unmodified	_HLDLFTDQEK_	W8U3A1	Alkyl hydroperoxide reductase AhpD OS=Staphylococcus aureus OX=1280 GN=BTN44_14950 PE=3 SV=1	2	623.309	1.6412	0.00034247	117.25	1
1063	HLEEVDIR	8	Unmodified	_HLEEVDIR_	W8UTF4	Transcriptional regulator OS=Staphylococcus aureus OX=1280 GN=BN1321_80096 PE=4 SV=1	2	505.767	3.7128	0.018409	76.679	1
1064	HLENSGENL	9	Unmodified	_HLENSGENL_	A0A380E3E9	Uncharacterized conserved protein OS=Staphylococcus aureus OX=1280 GN=NCTC5664_03476 PE=4 SV=1	2	506.738	-0.56883	0.0018256	118.5	1
1065	HLGIGTAPVSTQTLQR	16	Unmodified	_HLGIGTAPVSTQTLQR_	A0A380DX73	Adenylosuccinate lyase OS=Staphylococcus aureus OX=1280 GN=purB_2 PE=4 SV=1	3	560.313	0.080398	0.00014249	82.578	1
1066	HLLVETSVDK	10	Unmodified	_HLLVETSVDK_	W8TNQ9	ABC superfamily ATP binding cassette transporter, binding protein OS=Staphylococcus aureus OX=1280 GN=psaA PE=1 SV=1	2	570.817	-1.3351	2.4251e-05	136.02	1
1067	HLLVETSVDKK	11	Unmodified	_HLLVETSVDKK_	W8TNQ9	ABC superfamily ATP binding cassette transporter, binding protein OS=Staphylococcus aureus OX=1280 GN=psaA PE=1 SV=1	3	423.578	-1.2489	0.012007	46.73	1
1068	HLNFNPQSK	9	Unmodified	_HLNFNPQSK_	T1Y9N5	Transketolase OS=Staphylococcus aureus subsp. aureus CN1 OX=1193576 GN=SAKOR_01278 PE=3 SV=1	2	542.78	-0.55734	9.1741e-05	138.08	1
1069	HLNFNPQSK	9	Unmodified	_HLNFNPQSK_	T1Y9N5	Transketolase OS=Staphylococcus aureus subsp. aureus CN1 OX=1193576 GN=SAKOR_01278 PE=3 SV=1	2	542.78		8.4561e-32	149.27	1
1070	HLNFNPQSK	9	Unmodified	_HLNFNPQSK_	T1Y9N5	Transketolase OS=Staphylococcus aureus subsp. aureus CN1 OX=1193576 GN=SAKOR_01278 PE=3 SV=1	2	542.78	-0.85733	0.02712	57.532	1
1071	HLVPATLELGGK	12	Unmodified	_HLVPATLELGGK_	T1Y6J4	Aldehyde dehydrogenase B OS=Staphylococcus aureus subsp. aureus CN1 OX=1193576 GN=SAKOR_00147 PE=3 SV=1	3	412.243	2.0423	0.0017072	66.663	1
1072	HLVPATLELGGK	12	Unmodified	_HLVPATLELGGK_	T1Y6J4	Aldehyde dehydrogenase B OS=Staphylococcus aureus subsp. aureus CN1 OX=1193576 GN=SAKOR_00147 PE=3 SV=1	2	617.861	-1.2238	0.0040979	55.04	1
1073	HLVTVEEK	8	Unmodified	_HLVTVEEK_	W8UVN7	50S ribosomal protein L30 OS=Staphylococcus aureus OX=1280 GN=rpmD PE=1 SV=1	2	477.766	-1.5385	4.3576e-12	168.27	1
1074	HLYNQGELTASK	12	Unmodified	_HLYNQGELTASK_	A0A2X2K058	Divergent AAA domain-containing protein OS=Staphylococcus aureus OX=1280 GN=NCTC7878_01048 PE=4 SV=1	2	680.846	2.309	0.0013534	82.85	1
1075	HMADNISNVK	10	Oxidation (M)	_HM(ox)ADNISNVK_	T1Y894	Hexulose-6-phosphate synthase OS=Staphylococcus aureus subsp. aureus CN1 OX=1193576 GN=SAKOR_00559 PE=4 SV=1	2	572.774	-1.4463	0.00012853	124.42	1
1076	HMADNISNVK	10	Oxidation (M)	_HM(ox)ADNISNVK_	T1Y894	Hexulose-6-phosphate synthase OS=Staphylococcus aureus subsp. aureus CN1 OX=1193576 GN=SAKOR_00559 PE=4 SV=1	2	572.774	0.29763	0.00010845	105.03	1
1077	HMADNISNVK	10	Unmodified	_HMADNISNVK_	T1Y894	Hexulose-6-phosphate synthase OS=Staphylococcus aureus subsp. aureus CN1 OX=1193576 GN=SAKOR_00559 PE=4 SV=1	2	564.777	2.275	8.3079e-13	165.39	1
1078	HMAQDIVDLVSK	12	Oxidation (M)	_HM(ox)AQDIVDLVSK_	Q99UH2	Aerobic glycerol-3-phosphate dehydrogenase OS=Staphylococcus aureus (strain Mu50 / ATCC 700699) OX=158878 GN=glpD PE=3 SV=2	3	457.903	1.0267	0.0015125	73.273	1
1079	HMAQDIVDLVSK	12	Unmodified	_HMAQDIVDLVSK_	Q99UH2	Aerobic glycerol-3-phosphate dehydrogenase OS=Staphylococcus aureus (strain Mu50 / ATCC 700699) OX=158878 GN=glpD PE=3 SV=2	2	678.353	1.4142	0.000396	92.856	1
1080	HMAQDIVDLVSK	12	Unmodified	_HMAQDIVDLVSK_	Q99UH2	Aerobic glycerol-3-phosphate dehydrogenase OS=Staphylococcus aureus (strain Mu50 / ATCC 700699) OX=158878 GN=glpD PE=3 SV=2	3	452.571	1.2668	0.0013059	68.515	1
1081	HMCGALEVFPQIIK	14	Oxidation (M)	_HM(ox)CGALEVFPQIIK_	A0A6B1RKF6	Molybdopterin molybdenumtransferase MoeA OS=Staphylococcus aureus OX=1280 GN=GAY51_01205 PE=4 SV=1	3	553.618	-1.1022	0.014691	44.045	1
1082	HMGTDYK	7	Unmodified	_HMGTDYK_	A0A6B5UN24	Molecular chaperone DnaK OS=Staphylococcus aureus OX=1280 GN=dnaK PE=4 SV=1	2	426.189	-0.0063406	0.0039937	124.34	1
1083	HMTDVFETTASELGGK	16	Unmodified	_HMTDVFETTASELGGK_	A0A6B0BFL1	M20/M25/M40 family metallo-hydrolase (Fragment) OS=Staphylococcus aureus OX=1280 GN=GO793_15160 PE=4 SV=1	3	574.938	-0.29632	0.018117	32.746	1
1084	HNIESIDSK	9	Unmodified	_HNIESIDSK_	A0A6B0BR17	DNA-binding response regulator (Fragment) OS=Staphylococcus aureus OX=1280 GN=GO793_06960 PE=4 SV=1	2	521.762	1.0959	0.013603	68.536	1
1085	HNLEIDELAQQLNEK	15	Unmodified	_HNLEIDELAQQLNEK_	W8UTF4	Transcriptional regulator OS=Staphylococcus aureus OX=1280 GN=BN1321_80096 PE=4 SV=1	3	598.639	1.0405	0.00039599	81.526	1
1086	HNLEIDELAQQLNEK	15	Unmodified	_HNLEIDELAQQLNEK_	W8UTF4	Transcriptional regulator OS=Staphylococcus aureus OX=1280 GN=BN1321_80096 PE=4 SV=1	2	897.455	1.0933	1.8177e-70	227.63	1
1087	HNLHATFMPK	10	Unmodified	_HNLHATFMPK_	A0A659IAS8	Type I glutamate--ammonia ligase OS=Staphylococcus aureus OX=1280 GN=glnA PE=3 SV=1	3	399.206	-0.10012	0.0010474	80.24	1
1088	HNLNQLSK	8	Unmodified	_HNLNQLSK_	A0A6B5H121	DNA repair protein Rad50 OS=Staphylococcus aureus OX=1280 GN=G0Z13_13675 PE=4 SV=1	2	477.262	-1.0526	0.019934	74.92	1
1089	HNVPITVNR	9	Unmodified	_HNVPITVNR_	Q6GG38	Glutamate-1-semialdehyde 2,1-aminomutase 1 OS=Staphylococcus aureus (strain MRSA252) OX=282458 GN=hemL1 PE=3 SV=1	3	350.533	1.1044	0.013388	48.091	1
1090	HPFEQFNLESSLIDAVK	17	Unmodified	_HPFEQFNLESSLIDAVK_	A0A2X2JVQ9	ATP-dependent RNA helicase YqfR OS=Staphylococcus aureus OX=1280 GN=cshB PE=4 SV=1	3	658.67	1.517	1.687e-05	93.181	1
1091	HPFFEYAR	8	Unmodified	_HPFFEYAR_	A0A6B5KH18	Uncharacterized protein (Fragment) OS=Staphylococcus aureus OX=1280 GN=G0Y22_12665 PE=4 SV=1	2	533.759	-0.96173	0.021383	73.248	1
1092	HPNLPEGNLTK	11	Unmodified	_HPNLPEGNLTK_	W8U6K8	Ribonuclease 3 OS=Staphylococcus aureus OX=1280 GN=rnc PE=3 SV=1	2	610.325	0.61552	0.016793	58.172	1
1093	HPQYSVQVQK	10	Unmodified	_HPQYSVQVQK_	Q99RW4	Putative formate dehydrogenase SA2102 OS=Staphylococcus aureus (strain N315) OX=158879 GN=SA2102 PE=1 SV=1	2	607.32	0.10573	8.204e-48	218.11	1
1094	HQFGEAASLLETEIEK	16	Unmodified	_HQFGEAASLLETEIEK_	A0A6B5U8R7	Septation ring formation regulator EzrA OS=Staphylococcus aureus OX=1280 GN=ezrA PE=4 SV=1	3	601.304	-2.3311	3.6822e-06	104.21	1
1095	HQFGEAASLLETEIEK	16	Unmodified	_HQFGEAASLLETEIEK_	A0A6B5U8R7	Septation ring formation regulator EzrA OS=Staphylococcus aureus OX=1280 GN=ezrA PE=4 SV=1	2	901.452	-1.4459	0.0035489	67.646	1
1096	HQHPADYNVLAAR	13	Unmodified	_HQHPADYNVLAAR_	A0A5C8X549	Nitrate reductase subunit alpha (Fragment) OS=Staphylococcus aureus OX=1280 GN=FVP29_14645 PE=4 SV=1	3	497.92		9.8581e-05	65.043	1
1097	HQKPTQLNPEGGILETEAAIHVSNVQLLDPK	31	Unmodified	_HQKPTQLNPEGGILETEAAIHVSNVQLLDPK_	W8TRD5	50S ribosomal protein L24 OS=Staphylococcus aureus OX=1280 GN=rplX PE=1 SV=1	4	844.952	0.85279	3.6167e-12	81.532	1
1098	HQLENIIVMDENGK	14	Unmodified	_HQLENIIVMDENGK_	A0A6B5MHG9	Valine--tRNA ligase OS=Staphylococcus aureus OX=1280 GN=G0X47_01375 PE=4 SV=1	3	547.275	3.5359	0.015765	37.177	1
1099	HQLTENIK	8	Unmodified	_HQLTENIK_	A0A6D1RVL6	Pyruvate oxidase OS=Staphylococcus aureus OX=1280 GN=poxB PE=4 SV=1	2	491.769	2.5635	1.9332e-07	155.84	1
1100	HQTTQNNYITDQQKAFYQVLHLK	23	malon(K)	_HQTTQNNYITDQQK(ma)AFYQVLHLK_	Q2YVZ4	Immunoglobulin-binding protein Sbi OS=Staphylococcus aureus (strain bovine RF122 / ET3-1) OX=273036 GN=sbi PE=3 SV=1	4	726.862	-1.8372	0.00057246	49.66	1
1101	HSIVLVAEGCMTAQDCQK	18	Unmodified	_HSIVLVAEGCMTAQDCQK_	W8TVL7	ATP-dependent 6-phosphofructokinase OS=Staphylococcus aureus OX=1280 GN=pfkA PE=3 SV=1	3	682.985	-2.4713	1.2347e-09	118.31	1
1102	HSPTALR	7	Unmodified	_HSPTALR_	X5E2H8	1,4-dihydroxy-2-naphthoyl-CoA synthase OS=Staphylococcus aureus OX=1280 GN=menB PE=3 SV=1	2	391.219	0.6698	0.014194	110.63	1
1103	HSTGGVGDTTTLVLAPLVAAVDVPVAK	27	Unmodified	_HSTGGVGDTTTLVLAPLVAAVDVPVAK_	A0A380DXY3	Pyrimidine-nucleoside phosphorylase OS=Staphylococcus aureus OX=1280 GN=pdp PE=3 SV=1	3	863.481	-1.0453	1.0863e-12	94.594	1
1104	HTAEKALEK	9	Unmodified	_HTAEKALEK_	A0A0U1ML58	Proline--tRNA ligase OS=Staphylococcus aureus OX=1280 GN=proS PE=3 SV=1	2	513.783	0.47477	0.017887	83.358	1
1105	HTHDIITYGDIVPR	14	Unmodified	_HTHDIITYGDIVPR_	A0A6D1S0L2	Trehalose-6-phosphate hydrolase OS=Staphylococcus aureus OX=1280 GN=malL PE=4 SV=1	3	546.286	2.2416	0.0063425	47.774	1
1106	HTQGLNIPGM	10	Oxidation (M)	_HTQGLNIPGM(ox)_	A0A6D1RTD2	Transcriptional regulator OS=Staphylococcus aureus OX=1280 GN=SAMEA1708664_00369 PE=4 SV=1	2	542.266	0.18665	8.4391e-05	109.66	1
1107	HVAERPFLNK	10	Unmodified	_HVAERPFLNK_	A0A3A3AQW1	Pyruvate oxidase OS=Staphylococcus aureus OX=1280 GN=cidC PE=3 SV=1	3	404.228	2.0964	0.027326	30.797	1
1108	HVDLPASVPLAWGAHR	16	Unmodified	_HVDLPASVPLAWGAHR_	A0A5C8X8E1	CoA-disulfide reductase (Fragment) OS=Staphylococcus aureus OX=1280 GN=FVP29_07925 PE=4 SV=1	3	575.978	0.98952	0.0036391	52.527	1
1109	HVGVNYMLGK	10	Oxidation (M)	_HVGVNYM(ox)LGK_	W8UX05	Tyrosine--tRNA ligase OS=Staphylococcus aureus OX=1280 GN=tyrS PE=3 SV=1	2	567.292	-1.1884	0.0080421	61.161	1
1110	HVGVNYMLGK	10	Unmodified	_HVGVNYMLGK_	W8UX05	Tyrosine--tRNA ligase OS=Staphylococcus aureus OX=1280 GN=tyrS PE=3 SV=1	2	559.295	-1.8591	0.0021841	87.806	1
1111	HVIPEHDGLITEVLR	15	Unmodified	_HVIPEHDGLITEVLR_	A0A5C8XCC0	5'(3')-deoxyribonucleotidase (Fragment) OS=Staphylococcus aureus OX=1280 GN=FVP29_01350 PE=4 SV=1	3	576.653	4.3747	0.0042434	44.925	1
1112	HVLIVYDDLTK	11	Unmodified	_HVLIVYDDLTK_	A0A6D2GXJ7	ATP synthase F0F1 subunit alpha OS=Staphylococcus aureus OX=1280 GN=atpA PE=4 SV=1	2	658.366	0.5329	1.7935e-06	122.7	1
1113	HVLIVYDDLTK	11	Unmodified	_HVLIVYDDLTK_	A0A6D2GXJ7	ATP synthase F0F1 subunit alpha OS=Staphylococcus aureus OX=1280 GN=atpA PE=4 SV=1	3	439.247	0.068755	0.0053475	55.806	1
1114	HVLTSITYK	9	Unmodified	_HVLTSITYK_	A0A380ELW3	Lipoprotein OS=Staphylococcus aureus OX=1280 GN=yehR PE=4 SV=1	2	531.303	0.5669	0.00010476	137.05	1
1115	HVLVPGYSDDKDDLIK	16	Unmodified	_HVLVPGYSDDKDDLIK_	A0A1D4ZSF7	Pyruvate formate-lyase activating enzyme OS=Staphylococcus aureus OX=1280 GN=pflA_2 PE=4 SV=1	3	605.316	-1.2246	1.9204e-08	114.7	1
1116	HVNGQLYDPVELSQSTK	17	Deamidation (NQ)	_HVNGQ(de)LYDPVELSQSTK_	A0A6B5H121	DNA repair protein Rad50 OS=Staphylococcus aureus OX=1280 GN=G0Z13_13675 PE=4 SV=1	3	639.318	1.5932	0.00046159	71.601	1
1117	HVNVGLGGPTNGVPR	15	Deamidation (NQ)	_HVNVGLGGPTN(de)GVPR_	Q2YTF6	Formate--tetrahydrofolate ligase OS=Staphylococcus aureus (strain bovine RF122 / ET3-1) OX=273036 GN=fhs PE=3 SV=1	2	737.892	0.11042	4.2983e-06	108.63	1
1118	HVNVGLGGPTNGVPR	15	Deamidation (NQ)	_HVNVGLGGPTN(de)GVPR_	Q2YTF6	Formate--tetrahydrofolate ligase OS=Staphylococcus aureus (strain bovine RF122 / ET3-1) OX=273036 GN=fhs PE=3 SV=1	3	492.264	1.9122	2.9121e-05	99.991	1
1119	HVNVGLGGPTNGVPR	15	Unmodified	_HVNVGLGGPTNGVPR_	Q2YTF6	Formate--tetrahydrofolate ligase OS=Staphylococcus aureus (strain bovine RF122 / ET3-1) OX=273036 GN=fhs PE=3 SV=1	3	491.936	-0.13565	1.9473e-12	127.78	1
1120	HVNVNEITVRPV	12	Unmodified	_HVNVNEITVRPV_	A0A6B5JQP9	SDR family oxidoreductase OS=Staphylococcus aureus OX=1280 GN=G0V59_10640 PE=4 SV=1	2	688.886	-0.5727	0.018419	42.785	1
1121	HVPGVYPEDDVEK	13	Unmodified	_HVPGVYPEDDVEK_	A0A6B5SY48	Acyl-CoA thioesterase OS=Staphylococcus aureus OX=1280 GN=G0Z07_03655 PE=4 SV=1	3	495.24	2.2165	0.0079395	46.378	1
1122	HVPGVYPEDDVEK	13	Unmodified	_HVPGVYPEDDVEK_	A0A6B5SY48	Acyl-CoA thioesterase OS=Staphylococcus aureus OX=1280 GN=G0Z07_03655 PE=4 SV=1	2	742.357	0.63524	0.0099121	60.157	1
1123	HVPVYVTEDMVGHK	14	Oxidation (M)	_HVPVYVTEDM(ox)VGHK_	Q6GEI7	30S ribosomal protein S19 OS=Staphylococcus aureus (strain MRSA252) OX=282458 GN=rpsS PE=3 SV=1	3	542.936	-0.40472	0.010695	48.527	1
1124	HVPVYVTEDMVGHK	14	Oxidation (M)	_HVPVYVTEDM(ox)VGHK_	Q6GEI7	30S ribosomal protein S19 OS=Staphylococcus aureus (strain MRSA252) OX=282458 GN=rpsS PE=3 SV=1	3	542.936	-0.71318	0.0048547	56.139	1
1125	HVPVYVTEDMVGHK	14	Oxidation (M)	_HVPVYVTEDM(ox)VGHK_	Q6GEI7	30S ribosomal protein S19 OS=Staphylococcus aureus (strain MRSA252) OX=282458 GN=rpsS PE=3 SV=1	2	813.901	-0.39828	0.01403	44.511	1
1126	HVPVYVTEDMVGHK	14	Oxidation (M)	_HVPVYVTEDM(ox)VGHK_	Q6GEI7	30S ribosomal protein S19 OS=Staphylococcus aureus (strain MRSA252) OX=282458 GN=rpsS PE=3 SV=1	3	542.936	0.18269	0.0040473	57.434	1
1127	HVPVYVTEDMVGHK	14	Unmodified	_HVPVYVTEDMVGHK_	Q6GEI7	30S ribosomal protein S19 OS=Staphylococcus aureus (strain MRSA252) OX=282458 GN=rpsS PE=3 SV=1	3	537.605	1.4961	0.00065097	80.96	1
1128	HVRPDPDAYGSQLGLK	16	Unmodified	_HVRPDPDAYGSQLGLK_	A0A380DWN3	Bifunctional oligoribonuclease and PAP phosphatase nrnA OS=Staphylococcus aureus OX=1280 GN=nrnA_3 PE=4 SV=1	3	584.972	0.93841	6.6521e-05	90.498	1
1129	HVSYDTYLELNK	12	Unmodified	_HVSYDTYLELNK_	A0A6B5HWV6	Aminopeptidase P family protein OS=Staphylococcus aureus OX=1280 GN=G0X69_01445 PE=4 SV=1	3	494.581		0.0071996	48.568	1
1130	HVTLQDAK	8	Unmodified	_HVTLQDAK_	A0A380E4S0	Putative ATPase (AAA family) OS=Staphylococcus aureus OX=1280 GN=rarA_2 PE=4 SV=1	2	456.251	0.24937	0.012456	88.177	1
1131	HVVEQVFER	9	Unmodified	_HVVEQVFER_	A0A0U1MI40	Methionine--tRNA ligase OS=Staphylococcus aureus OX=1280 GN=metS PE=3 SV=1	3	381.537	-0.58	0.02553	31.494	1
1132	HVVEQVFER	9	Unmodified	_HVVEQVFER_	A0A0U1MI40	Methionine--tRNA ligase OS=Staphylococcus aureus OX=1280 GN=metS PE=3 SV=1	2	571.801		0.0069699	71.451	1
1133	HVYDPTCGSGSLLLR	15	Unmodified	_HVYDPTCGSGSLLLR_	A0A380DUJ0	Type I restriction-modification system,DNA-methyltransferase subunit M OS=Staphylococcus aureus OX=1280 GN=NCTC6133_02430 PE=4 SV=1	3	558.947		0.00010648	59.709	1
1134	HWADDDQDTSDLAYEASVK	19	Unmodified	_HWADDDQDTSDLAYEASVK_	A0A454GWI8	Beta-ketoacyl-[acyl-carrier-protein] synthase III (Fragment) OS=Staphylococcus aureus OX=1280 GN=C7P97_13825 PE=3 SV=1	3	722.647	0.59813	1.2029e-14	126.84	1
1135	HYAHIDAPGHADYVK	15	Unmodified	_HYAHIDAPGHADYVK_	A0A6B0CJV0	Elongation factor Tu OS=Staphylococcus aureus OX=1280 GN=tuf PE=4 SV=1	4	424.207	-0.55161	0.0076644	42.785	1
1136	HYAHVDCPGHADYVK	15	Unmodified	_HYAHVDCPGHADYVK_	W8TRT9	Elongation factor Tu OS=Staphylococcus aureus OX=1280 GN=tufA PE=3 SV=1	4	442.952	-0.76275	8.5689e-06	103.76	2
1137	HYAHVDCPGHADYVK	15	Unmodified	_HYAHVDCPGHADYVK_	W8TRT9	Elongation factor Tu OS=Staphylococcus aureus OX=1280 GN=tufA PE=3 SV=1	3	590.267	-1.6975	1.6584e-18	143.93	1
1138	HYAHVDCPGHADYVK	15	Unmodified	_HYAHVDCPGHADYVK_	W8TRT9	Elongation factor Tu OS=Staphylococcus aureus OX=1280 GN=tufA PE=3 SV=1	3	590.267	-0.55581	0.0019658	59.227	1
1139	HYAHVDCPGHADYVK	15	Unmodified	_HYAHVDCPGHADYVK_	W8TRT9	Elongation factor Tu OS=Staphylococcus aureus OX=1280 GN=tufA PE=3 SV=1	3	590.267	-0.97891	1.9375e-05	100.11	1
1140	HYFESPLFK	9	Unmodified	_HYFESPLFK_	A0A0U1MFQ4	Uncharacterized protein OS=Staphylococcus aureus OX=1280 GN=SAMEA2445518_01541 PE=4 SV=1	2	584.295		6.5673e-05	91.867	1
1141	HYGGLQGLNK	10	Unmodified	_HYGGLQGLNK_	A0A133QCU1	2,3-bisphosphoglycerate-dependent phosphoglycerate mutase (Fragment) OS=Staphylococcus aureus OX=1280 GN=HMPREF3211_00061 PE=3 SV=1	3	362.861	-0.33016	0.020355	36.381	1
1142	HYGGLQGLNK	10	Unmodified	_HYGGLQGLNK_	A0A133QCU1	2,3-bisphosphoglycerate-dependent phosphoglycerate mutase (Fragment) OS=Staphylococcus aureus OX=1280 GN=HMPREF3211_00061 PE=3 SV=1	3	362.861	-1.1001	0.014834	43.442	1
1143	HYGGLQGLNK	10	Unmodified	_HYGGLQGLNK_	A0A133QCU1	2,3-bisphosphoglycerate-dependent phosphoglycerate mutase (Fragment) OS=Staphylococcus aureus OX=1280 GN=HMPREF3211_00061 PE=3 SV=1	2	543.788	-1.3617	0.01991	58.916	1
1144	HYGGLQGLNKDDAR	14	malon(K)	_HYGGLQGLNK(ma)DDAR_	A0A133QCU1	2,3-bisphosphoglycerate-dependent phosphoglycerate mutase (Fragment) OS=Staphylococcus aureus OX=1280 GN=HMPREF3211_00061 PE=3 SV=1	3	543.925	0.59221	4.0883e-05	102.65	1
1145	HYGGLQGLNKDDAR	14	malon(K)	_HYGGLQGLNK(ma)DDAR_	A0A133QCU1	2,3-bisphosphoglycerate-dependent phosphoglycerate mutase (Fragment) OS=Staphylococcus aureus OX=1280 GN=HMPREF3211_00061 PE=3 SV=1	2	815.384	0.92319	0.0025047	87.088	1
1146	HYLDNHNYK	9	Unmodified	_HYLDNHNYK_	W8TQJ7	Cytochrome aa3 quinol oxidase subunit I OS=Staphylococcus aureus OX=1280 GN=qoxB PE=3 SV=1	3	401.856	0.67481	0.0075554	56.434	1
1147	HYNGDFVIR	9	Unmodified	_HYNGDFVIR_	A0A380DKX8	Glutamate--tRNA ligase OS=Staphylococcus aureus OX=1280 GN=gltX_1 PE=3 SV=1	2	560.78		0.0036263	76.228	1
1148	HYSPNTPLTIITDIESK	17	Unmodified	_HYSPNTPLTIITDIESK_	A0A380DX31	Sua5/YciO/YrdC/YwlC family protein OS=Staphylococcus aureus OX=1280 GN=NCTC6133_02876 PE=4 SV=1	3	643.67	-0.27766	0.016621	32.366	1
1149	HYSQPAQDTGNVTNEITIK	19	Unmodified	_HYSQPAQDTGNVTNEITIK_	A0A5C8X503	Response regulator transcription factor (Fragment) OS=Staphylococcus aureus OX=1280 GN=FVP29_14825 PE=4 SV=1	3	706.015	0.55084	5.7308e-08	96.012	1
1150	HYVMVSTYDSR	11	Unmodified	_HYVMVSTYDSR_	A0A380DU22	Oxidoreductase ylbE OS=Staphylococcus aureus OX=1280 GN=ylbE_2 PE=4 SV=1	3	453.212	1.3975	0.023618	31.136	1
1151	HYWNIGIAADTDR	13	Unmodified	_HYWNIGIAADTDR_	T1Y7U3	Dihydrolipoamide acetyltransferase component of pyruvate dehydrogenase complex OS=Staphylococcus aureus subsp. aureus CN1 OX=1193576 GN=SAKOR_01017 PE=3 SV=1	3	511.248	2.1341	0.00076761	76.073	1
1152	HYWNIGIAADTDR	13	Unmodified	_HYWNIGIAADTDR_	T1Y7U3	Dihydrolipoamide acetyltransferase component of pyruvate dehydrogenase complex OS=Staphylococcus aureus subsp. aureus CN1 OX=1193576 GN=SAKOR_01017 PE=3 SV=1	2	766.368	1.8018	2.478e-07	114.7	1
1153	IAAEGLVHVETK	12	Unmodified	_IAAEGLVHVETK_	A0A6B1RWP0	Elongation factor Ts OS=Staphylococcus aureus OX=1280 GN=GAY51_11945 PE=4 SV=1	3	422.907	0.86058	0.0011944	69.03	1
1154	IAAEGLVHVETK	12	Unmodified	_IAAEGLVHVETK_	A0A6B1RWP0	Elongation factor Ts OS=Staphylococcus aureus OX=1280 GN=GAY51_11945 PE=4 SV=1	2	633.856	0.30568	9.6617e-05	101.39	1
1155	IAASLALK	8	Unmodified	_IAASLALK_	W8UT26	Elongation factor G OS=Staphylococcus aureus OX=1280 GN=fusA PE=3 SV=1	2	393.758	-1.8267	0.028084	66.429	1
1156	IAASLALK	8	Unmodified	_IAASLALK_	W8UT26	Elongation factor G OS=Staphylococcus aureus OX=1280 GN=fusA PE=3 SV=1	2	393.758	1.5092	0.013	85.161	1
1157	IADESFDGDALK	12	Unmodified	_IADESFDGDALK_	Q2FYE8	Ferredoxin, putative OS=Staphylococcus aureus (strain NCTC 8325) OX=93061 GN=SAOUHSC_01504 PE=4 SV=1	2	640.804	-0.78774	0.0015653	81.565	1
1158	IADTGVDPLPLMK	13	Oxidation (M)	_IADTGVDPLPLM(ox)K_	A0A380ELR3	Transaldolase OS=Staphylococcus aureus OX=1280 GN=tal PE=4 SV=1	2	693.371	0.72523	0.0092115	52.576	1
1159	IADTGVDPLPLMK	13	Unmodified	_IADTGVDPLPLMK_	A0A380ELR3	Transaldolase OS=Staphylococcus aureus OX=1280 GN=tal PE=4 SV=1	2	685.373	-0.27268	0.0075435	64.104	1
1160	IAEAEAAGADYVGEAEYVQK	20	Unmodified	_IAEAEAAGADYVGEAEYVQK_	Q6GJD0	50S ribosomal protein L1 OS=Staphylococcus aureus (strain MRSA252) OX=282458 GN=rplA PE=3 SV=1	3	695.332	-1.4928	1.0738e-08	103.88	1
1161	IAEAEAAGADYVGEAEYVQK	20	Unmodified	_IAEAEAAGADYVGEAEYVQK_	Q6GJD0	50S ribosomal protein L1 OS=Staphylococcus aureus (strain MRSA252) OX=282458 GN=rplA PE=3 SV=1	2	1042.49	-1.5712	1.4386e-36	162.76	1
1162	IAEDYNIPFK	10	Unmodified	_IAEDYNIPFK_	T1Y9U1	D-alanine aminotransferase OS=Staphylococcus aureus subsp. aureus CN1 OX=1193576 GN=SAKOR_01692 PE=3 SV=1	2	605.311	-2.3916	0.00067757	94.692	1
1163	IAEEGYDPEYGAR	13	Unmodified	_IAEEGYDPEYGAR_	A0A6B0A7W0	AAA domain-containing protein OS=Staphylococcus aureus OX=1280 GN=GO651_14495 PE=4 SV=1	2	735.331	1.8039	0.0015778	84.365	1
1164	IAEEQGLVTAK	11	Unmodified	_IAEEQGLVTAK_	A0A2X2K1Y0	tRNA-specific 2-thiouridylase MnmA OS=Staphylococcus aureus OX=1280 GN=mnmA PE=3 SV=1	2	579.822	0.15225	0.0068478	53.557	1
1165	IAELGTMHR	9	Oxidation (M)	_IAELGTM(ox)HR_	W8TVM8	Threonine--tRNA ligase OS=Staphylococcus aureus OX=1280 GN=thrS PE=3 SV=1	2	522.269	-0.7404	0.00059898	102.62	1
1166	IAFHEPPINTFLPDSTYWK	19	Unmodified	_IAFHEPPINTFLPDSTYWK_	A0A5C8X5L7	Alpha/beta hydrolase (Fragment) OS=Staphylococcus aureus OX=1280 GN=FVP29_12910 PE=4 SV=1	3	759.384	0.69285	1.9495e-06	85.087	1
1167	IAGVDIPR	8	Unmodified	_IAGVDIPR_	W8U8U6	30S ribosomal protein S13 OS=Staphylococcus aureus OX=1280 GN=rpsM PE=1 SV=1	2	420.751	-0.051184	0.024351	69.825	1
1168	IAIQYYGSGSPENVEK	16	Unmodified	_IAIQYYGSGSPENVEK_	A0A6B1RQF5	Elastin-binding protein EbpS OS=Staphylococcus aureus OX=1280 GN=ebpS PE=4 SV=1	2	877.933	1.0469	5.4013e-08	115.8	1
1169	IAKYITDTNENSGVGK	16	malon(K)	_IAK(ma)YITDTNENSGVGK_	A0A077URT6	Hydrolase (HAD superfamily) OS=Staphylococcus aureus OX=1280 GN=ywpJ PE=4 SV=1	2	898.439	-0.10574	0.0031199	74.296	1
1170	IALAMIEK	8	Oxidation (M)	_IALAM(ox)IEK_	W8TRW6	Cysteine synthase OS=Staphylococcus aureus OX=1280 GN=cysK PE=3 SV=1	2	452.762	-0.081279	0.018787	56.258	1
1171	IALANNPSHLEIVAPVVEGR	20	Unmodified	_IALANNPSHLEIVAPVVEGR_	A0A380EIT5	2-oxoglutarate dehydrogenase E1 component OS=Staphylococcus aureus OX=1280 GN=odhA_5 PE=4 SV=1	3	700.392	0.90572	3.5008e-08	95.5	1
1172	IALFCDINK	9	Unmodified	_IALFCDINK_	A0A6B0BSI2	CTP synthase (Fragment) OS=Staphylococcus aureus OX=1280 GN=GO793_17275 PE=4 SV=1	2	547.289		0.010861	61.161	1
1173	IALHQLTENIK	11	Unmodified	_IALHQLTENIK_	A0A3A3AQW1	Pyruvate oxidase OS=Staphylococcus aureus OX=1280 GN=cidC PE=3 SV=1	2	640.372		9.883e-06	82.505	1
1174	IAPVLEELAADYEGK	15	Unmodified	_IAPVLEELAADYEGK_	A0A2X2JXN0	Thioredoxin OS=Staphylococcus aureus OX=1280 GN=trxA_1 PE=4 SV=1	2	809.422	-1.3813	3.834e-05	103.79	1
1175	IAQVNAVDLDEVLNR	15	Unmodified	_IAQVNAVDLDEVLNR_	W8TS62	Probable manganese-dependent inorganic pyrophosphatase OS=Staphylococcus aureus OX=1280 GN=ppaC PE=3 SV=1	2	834.949	3.1192	5.3489e-20	153.09	2
1176	IATATVGEGSSNQGDFHEGLNFAGVHK	27	Unmodified	_IATATVGEGSSNQGDFHEGLNFAGVHK_	T1YAU4	2-oxoisovalerate dehydrogenase alpha subunit OS=Staphylococcus aureus subsp. aureus CN1 OX=1193576 GN=SAKOR_01464 PE=4 SV=1	3	915.107	2.3957	6.531e-29	134.66	1
1177	IATPIVACNEK	11	Unmodified	_IATPIVACNEK_	A0A2X2JYX5	NADH dehydrogenase OS=Staphylococcus aureus OX=1280 GN=NCTC7878_00625 PE=4 SV=1	2	608.324	1.0471	0.00080485	91.313	1
1178	IATVENPELSFASK	14	Unmodified	_IATVENPELSFASK_	T1YAM7	Leukocidin S subunit LukS OS=Staphylococcus aureus subsp. aureus CN1 OX=1193576 GN=SAKOR_01987 PE=4 SV=1	2	753.396	1.1412	6.3998e-08	118.51	1
1179	IAVLTSGGDSPGMNAAVR	18	Oxidation (M)	_IAVLTSGGDSPGM(ox)NAAVR_	W8TVL7	ATP-dependent 6-phosphofructokinase OS=Staphylococcus aureus OX=1280 GN=pfkA PE=3 SV=1	2	866.438	1.2946	0.0069831	46.543	1
1180	IAVLTSGGDSPGMNAAVR	18	Unmodified	_IAVLTSGGDSPGMNAAVR_	W8TVL7	ATP-dependent 6-phosphofructokinase OS=Staphylococcus aureus OX=1280 GN=pfkA PE=3 SV=1	2	858.441	-1.8266	2.46e-18	138.05	1
1181	IAVPALTEER	10	Unmodified	_IAVPALTEER_	A0A5C8X9A9	Ribosome recycling factor (Fragment) OS=Staphylococcus aureus OX=1280 GN=FVP29_06260 PE=3 SV=1	2	549.811	0.021189	0.017156	61.344	1
1182	ICESCGTTYHLVFNPPK	17	Unmodified	_ICESCGTTYHLVFNPPK_	W8TRE5	Adenylate kinase OS=Staphylococcus aureus OX=1280 GN=adk PE=3 SV=1	3	674.985	-0.11144	0.00029243	75.316	1
1183	ICSYAQGFAQMR	12	Unmodified	_ICSYAQGFAQMR_	A0A6B0BDT6	NADP-dependent phosphogluconate dehydrogenase (Fragment) OS=Staphylococcus aureus OX=1280 GN=gndA PE=4 SV=1	2	716.329	0.61807	0.0011976	84.479	1
1184	IDAPDAEDMQFK	12	Oxidation (M)	_IDAPDAEDM(ox)QFK_	T1Y7U3	Dihydrolipoamide acetyltransferase component of pyruvate dehydrogenase complex OS=Staphylococcus aureus subsp. aureus CN1 OX=1193576 GN=SAKOR_01017 PE=3 SV=1	2	698.308	-0.91958	0.010112	53.448	1
1185	IDAPDAEDMQFK	12	Unmodified	_IDAPDAEDMQFK_	T1Y7U3	Dihydrolipoamide acetyltransferase component of pyruvate dehydrogenase complex OS=Staphylococcus aureus subsp. aureus CN1 OX=1193576 GN=SAKOR_01017 PE=3 SV=1	2	690.311	0.3773	0.0024939	77.185	2
1186	IDAPDAEDMQFKGHDDDSSSK	21	malon(K)	_IDAPDAEDMQFK(ma)GHDDDSSSK_	T1Y7U3	Dihydrolipoamide acetyltransferase component of pyruvate dehydrogenase complex OS=Staphylococcus aureus subsp. aureus CN1 OX=1193576 GN=SAKOR_01017 PE=3 SV=1	3	798.661	-0.2484	2.1454e-08	96.052	1
1187	IDELIEEISK	10	Unmodified	_IDELIEEISK_	W8TMY9	2-keto-4-pentenoate hydratase OS=Staphylococcus aureus OX=1280 GN=yisK PE=4 SV=1	2	594.822	1.3428	0.0023202	87.184	1
1188	IDEYPSSQGQK	11	Unmodified	_IDEYPSSQGQK_	A0A6B5IXG1	DNA repair exonuclease (Fragment) OS=Staphylococcus aureus OX=1280 GN=G0Y39_13225 PE=4 SV=1	2	626.296	-0.952	0.00027233	94.767	1
1189	IDFIWSHTLK	10	Unmodified	_IDFIWSHTLK_	Q9KX07	Thioredoxin reductase (Fragment) OS=Staphylococcus aureus OX=1280 PE=3 SV=1	3	420.564	2.4317	0.025907	29.063	1
1190	IDFSSILETFK	11	Unmodified	_IDFSSILETFK_	W8TV52	Ferritin OS=Staphylococcus aureus OX=1280 GN=ftnA PE=3 SV=1	2	650.345	-1.392	0.00435	73.435	1
1191	IDHIGAGSVSDK	12	Unmodified	_IDHIGAGSVSDK_	A0A2X2M4M4	Molybdopterin molybdenumtransferase OS=Staphylococcus aureus OX=1280 GN=moeA_2 PE=3 SV=1	3	400.207	0.13902	5.7129e-08	119.25	1
1192	IDHIGAGSVSDK	12	Unmodified	_IDHIGAGSVSDK_	A0A2X2M4M4	Molybdopterin molybdenumtransferase OS=Staphylococcus aureus OX=1280 GN=moeA_2 PE=3 SV=1	2	599.807	0.26742	0.00084512	88.163	1
1193	IDIVQWNEDPK	11	Unmodified	_IDIVQWNEDPK_	A0A380DYD6	Transcription termination/antitermination protein NusA OS=Staphylococcus aureus OX=1280 GN=nusA PE=3 SV=1	2	678.843	1.2923	0.019962	56.205	1
1194	IDKPISNPDR	10	Unmodified	_IDKPISNPDR_	A0A6B1RUQ0	Translation initiation factor IF-2 OS=Staphylococcus aureus OX=1280 GN=infB PE=4 SV=1	3	385.544	0.44826	0.026508	31.819	1
1195	IDKPISNPDR	10	Unmodified	_IDKPISNPDR_	A0A6B1RUQ0	Translation initiation factor IF-2 OS=Staphylococcus aureus OX=1280 GN=infB PE=4 SV=1	2	577.812	-0.23803	0.0022649	94.767	1
1196	IDLVHPDELMPK	12	Unmodified	_IDLVHPDELMPK_	A0A380E475	GTPase Era OS=Staphylococcus aureus OX=1280 GN=bex_1 PE=3 SV=1	3	469.583	2.5045	0.01876	35.677	1
1197	IDTGYNFK	8	Unmodified	_IDTGYNFK_	A0A6B5TQF4	YSIRK-type signal peptide-containing protein OS=Staphylococcus aureus OX=1280 GN=G0W53_00820 PE=4 SV=1	2	479.237	1.6203	0.022898	71.501	1
1198	IDVEGVNVR	9	Unmodified	_IDVEGVNVR_	A0A6B1RUQ0	Translation initiation factor IF-2 OS=Staphylococcus aureus OX=1280 GN=infB PE=4 SV=1	2	500.775	-0.3706	0.010455	72.928	1
1199	IDWEVLQK	8	Unmodified	_IDWEVLQK_	A0A380DLM1	GMP synthase [glutamine-hydrolyzing] OS=Staphylococcus aureus OX=1280 GN=guaA PE=3 SV=1	2	515.782	-0.45209	0.0081003	124.98	1
1200	IEAAISFIENNPK	13	Unmodified	_IEAAISFIENNPK_	Q99UU0	Carbamate kinase 1 OS=Staphylococcus aureus (strain Mu50 / ATCC 700699) OX=158878 GN=arcC1 PE=3 SV=1	2	723.385	0.22198	0.0050384	68.277	1
1201	IEAAISFIENNPK	13	Unmodified	_IEAAISFIENNPK_	Q99UU0	Carbamate kinase 1 OS=Staphylococcus aureus (strain Mu50 / ATCC 700699) OX=158878 GN=arcC1 PE=3 SV=1	2	723.385	-0.058764	2.5446e-18	161.48	1
1202	IEAAQYFEGK	10	Unmodified	_IEAAQYFEGK_	A0A380DU22	Oxidoreductase ylbE OS=Staphylococcus aureus OX=1280 GN=ylbE_2 PE=4 SV=1	2	578.288	1.27	0.0042869	79.659	1
1203	IEAGTLLIAGAITR	14	Unmodified	_IEAGTLLIAGAITR_	Q2YUK4	UDP-N-acetylglucosamine 1-carboxyvinyltransferase 1 OS=Staphylococcus aureus (strain bovine RF122 / ET3-1) OX=273036 GN=murA1 PE=3 SV=1	2	699.919	-1.5797	0.0077387	60.55	1
1204	IEDALNSTR	9	Unmodified	_IEDALNSTR_	A0A6B0BQA0	Chaperonin GroEL (Fragment) OS=Staphylococcus aureus OX=1280 GN=groL PE=4 SV=1	2	509.762	1.5609	0.0094483	74.841	1
1205	IEDDPSHPEYIVTR	14	Unmodified	_IEDDPSHPEYIVTR_	A0A5C8X503	Response regulator transcription factor (Fragment) OS=Staphylococcus aureus OX=1280 GN=FVP29_14825 PE=4 SV=1	3	557.606	1.3106	0.0021396	58.885	1
1206	IEDIDTPK	8	Unmodified	_IEDIDTPK_	A0A6B1RLG9	Zinc-binding dehydrogenase OS=Staphylococcus aureus OX=1280 GN=GAY51_01625 PE=4 SV=1	2	465.743	-1.4901	0.018942	76.064	1
1207	IEEPNVVLPHR	11	Unmodified	_IEEPNVVLPHR_	A0A6A9GTV7	Catabolite control protein A OS=Staphylococcus aureus OX=1280 GN=ccpA PE=4 SV=1	3	434.91	1.1407	0.0036798	60.598	1
1208	IEEPNVVLPHR	11	Unmodified	_IEEPNVVLPHR_	A0A6A9GTV7	Catabolite control protein A OS=Staphylococcus aureus OX=1280 GN=ccpA PE=4 SV=1	3	434.91	-0.050486	0.00080881	78.342	1
1209	IEEVTNK	7	Unmodified	_IEEVTNK_	A0A6B5TQF4	YSIRK-type signal peptide-containing protein OS=Staphylococcus aureus OX=1280 GN=G0W53_00820 PE=4 SV=1	2	416.724	0.95638	0.023592	97.798	1
1210	IEHDTFGEIEVPADK	15	Unmodified	_IEHDTFGEIEVPADK_	T1YA47	Fumarate hydratase class II OS=Staphylococcus aureus subsp. aureus CN1 OX=1193576 GN=fumC PE=3 SV=1	3	567.277	1.1033	0.00056743	77.42	1
1211	IELDDIQPSSR	11	Unmodified	_IELDDIQPSSR_	W8TWE8	ABC efflux transporter (ATP-binding protein) OS=Staphylococcus aureus OX=1280 GN=ykpA PE=4 SV=1	2	636.825		0.00039653	69.815	1
1212	IEMALHDTEIVR	12	Oxidation (M)	_IEM(ox)ALHDTEIVR_	W8TSM8	Formate C-acetyltransferase OS=Staphylococcus aureus OX=1280 GN=pflB PE=4 SV=1	3	481.582	-0.96899	0.0025207	67.997	1
1213	IEMALHDTEIVR	12	Oxidation (M)	_IEM(ox)ALHDTEIVR_	W8TSM8	Formate C-acetyltransferase OS=Staphylococcus aureus OX=1280 GN=pflB PE=4 SV=1	2	721.869	1.2982	0.0017451	71.176	1
1214	IEMALHDTEIVR	12	Oxidation (M)	_IEM(ox)ALHDTEIVR_	W8TSM8	Formate C-acetyltransferase OS=Staphylococcus aureus OX=1280 GN=pflB PE=4 SV=1	3	481.582	-0.80682	0.0025207	67.997	1
1215	IEMALHDTEIVR	12	Oxidation (M)	_IEM(ox)ALHDTEIVR_	W8TSM8	Formate C-acetyltransferase OS=Staphylococcus aureus OX=1280 GN=pflB PE=4 SV=1	2	721.869	-2.738	0.0093122	54.343	1
1216	IEMALHDTEIVR	12	Unmodified	_IEMALHDTEIVR_	W8TSM8	Formate C-acetyltransferase OS=Staphylococcus aureus OX=1280 GN=pflB PE=4 SV=1	3	476.25	-0.12338	0.00025049	86.772	1
1217	IEMALHDTEIVR	12	Unmodified	_IEMALHDTEIVR_	W8TSM8	Formate C-acetyltransferase OS=Staphylococcus aureus OX=1280 GN=pflB PE=4 SV=1	2	713.872	0.54433	1.4502e-10	145.29	1
1218	IEMALHDTEIVR	12	Unmodified	_IEMALHDTEIVR_	W8TSM8	Formate C-acetyltransferase OS=Staphylococcus aureus OX=1280 GN=pflB PE=4 SV=1	3	476.25	1.1466	0.0014182	67.997	1
1219	IEQLADEGNKPAK	13	Unmodified	_IEQLADEGNKPAK_	A0A5C8XC60	HlyC/CorC family transporter (Fragment) OS=Staphylococcus aureus OX=1280 GN=FVP29_01520 PE=4 SV=1	3	471.584	-1.5273	0.0072956	49.333	1
1220	IESLLSR	7	Unmodified	_IESLLSR_	A0A6B5I3U4	Transcriptional regulator (Fragment) OS=Staphylococcus aureus OX=1280 GN=G0V76_13030 PE=4 SV=1	2	409.243	-2.467	0.025486	89.296	1
1221	IETIEISEDAK	11	Unmodified	_IETIEISEDAK_	W8TRE8	DNA-directed RNA polymerase subunit alpha OS=Staphylococcus aureus OX=1280 GN=rpoA PE=3 SV=1	2	624.322	-0.20571	2.0231e-06	117.09	1
1222	IETISEQVGIK	11	Unmodified	_IETISEQVGIK_	A0A6B1RTN7	Transcriptional regulator OS=Staphylococcus aureus OX=1280 GN=GAY51_12975 PE=4 SV=1	2	608.843	-1.0897	0.012503	62.466	1
1223	IETPNVK	7	Unmodified	_IETPNVK_	A0A0U1ML58	Proline--tRNA ligase OS=Staphylococcus aureus OX=1280 GN=proS PE=3 SV=1	2	400.729	0.23557	0.025402	82.671	1
1224	IEVTIPLK	8	Unmodified	_IEVTIPLK_	A0A380EGD5	Ribosomal subunit interface protein OS=Staphylococcus aureus OX=1280 GN=NCTC10702_01266 PE=4 SV=1	2	456.792	1.1646	0.024351	69.825	1
1225	IFATTDK	7	Unmodified	_IFATTDK_	A0A5C8X3S3	Glucose-6-phosphate isomerase (Fragment) OS=Staphylococcus aureus OX=1280 GN=FVP29_16385 PE=3 SV=1	2	398.216	-0.11869	0.025451	86.472	1
1226	IFENPQATFKK	11	malon(K)	_IFENPQATFK(ma)K_	T1YD05	Arginine deiminase OS=Staphylococcus aureus subsp. aureus CN1 OX=1193576 GN=arcA PE=3 SV=1	2	704.859	0.2453	0.0030147	75.102	1
1227	IFLNGEFVSPSEAK	14	Unmodified	_IFLNGEFVSPSEAK_	T1Y9U1	D-alanine aminotransferase OS=Staphylococcus aureus subsp. aureus CN1 OX=1193576 GN=SAKOR_01692 PE=3 SV=1	2	769.398	0.93602	7.449e-08	118.24	1
1228	IFQEVLPK	8	Unmodified	_IFQEVLPK_	T1Y6J4	Aldehyde dehydrogenase B OS=Staphylococcus aureus subsp. aureus CN1 OX=1193576 GN=SAKOR_00147 PE=3 SV=1	2	487.289	-3.8947	0.027194	62.104	1
1229	IFQNIESMDK	10	Oxidation (M),2 Deamidation (NQ)	_IFQ(de)N(de)IESM(ox)DK_	Q9LBZ2	Uncharacterized protein OS=Staphylococcus aureus OX=1280 PE=4 SV=1	2	621.782	0.59891	0.0097837	48.091	1
1230	IFYNPDMPLIK	11	Unmodified	_IFYNPDMPLIK_	Q2FVM2	Nitrate reductase, beta subunit OS=Staphylococcus aureus (strain NCTC 8325) OX=93061 GN=SAOUHSC_02680 PE=4 SV=1	2	675.86	0.90521	0.012337	62.633	1
1231	IGEIGKYFDIPQYK	14	malon(K)	_IGEIGK(ma)YFDIPQYK_	A0A4T9Z4Q4	Mannosyl-glycoprotein endo-beta-N-acetylglucosamidase OS=Staphylococcus aureus subsp. aureus OX=46170 GN=FAF17_04715 PE=4 SV=1	3	586.298	2.7185	0.012527	47.774	1
1232	IGETHEGASQMDWMEQEQDR	20	Oxidation (M)	_IGETHEGASQMDWM(ox)EQEQDR_	W8UT26	Elongation factor G OS=Staphylococcus aureus OX=1280 GN=fusA PE=3 SV=1	3	798.33	-1.9933	2.4251e-10	108.71	1
1233	IGETHEGASQMDWMEQEQDR	20	Unmodified	_IGETHEGASQMDWMEQEQDR_	W8UT26	Elongation factor G OS=Staphylococcus aureus OX=1280 GN=fusA PE=3 SV=1	3	792.999	0.46294	4.6254e-37	160.76	1
1234	IGGEYGIPHGR	11	Unmodified	_IGGEYGIPHGR_	A0A380DMA3	Acetaldehyde dehydrogenase OS=Staphylococcus aureus OX=1280 GN=adhE PE=4 SV=1	3	385.868		0.025293	32.329	1
1235	IGGGVAINLSK	11	Unmodified	_IGGGVAINLSK_	A0A6B1RLY3	Class 1b ribonucleoside-diphosphate reductase subunit alpha OS=Staphylococcus aureus OX=1280 GN=nrdE PE=4 SV=1	2	514.809	-0.0029614	0.027285	53.034	1
1236	IGGQVNDTAGIENFITVK	18	Unmodified	_IGGQVNDTAGIENFITVK_	A0A6B0D0C8	Alkyl hydroperoxide reductase subunit F (Fragment) OS=Staphylococcus aureus OX=1280 GN=ahpF PE=4 SV=1	2	938.494	0.68812	0.0006639	50.226	1
1237	IGKQLLMTR	9	Oxidation (M),Deamidation (NQ),malon(K)	_IGK(ma)Q(de)LLM(ox)TR_	A0A380DVD9	Potassium-transporting ATPase subunit B 2 OS=Staphylococcus aureus OX=1280 GN=kdpB_4 PE=4 SV=1	2	581.81	0.36214	0.0098578	53.211	1
1238	IGLASPEK	8	Unmodified	_IGLASPEK_	A0A6B5TUA1	DNA-directed RNA polymerase subunit beta OS=Staphylococcus aureus OX=1280 GN=rpoC PE=4 SV=1	2	407.737	-0.23365	0.023003	71.379	1
1239	IGMTQVFGENGELIPVTVVEAK	22	Oxidation (M)	_IGM(ox)TQVFGENGELIPVTVVEAK_	W8U3W0	50S ribosomal protein L3 OS=Staphylococcus aureus OX=1280 GN=rplC PE=1 SV=1	3	783.079	0.84948	4.2364e-24	143.52	1
1240	IGMTQVFGENGELIPVTVVEAK	22	Unmodified	_IGMTQVFGENGELIPVTVVEAK_	W8U3W0	50S ribosomal protein L3 OS=Staphylococcus aureus OX=1280 GN=rplC PE=1 SV=1	3	777.747	0.061883	1.638e-23	132.76	1
1241	IGMVIVATESAVDAAK	16	Unmodified	_IGMVIVATESAVDAAK_	T1YBK5	Hydroxymethylglutaryl-CoA synthase OS=Staphylococcus aureus subsp. aureus CN1 OX=1193576 GN=SAKOR_02536 PE=4 SV=1	2	787.927	0.62918	0.021749	46.892	1
1242	IGNNVGR	7	Unmodified	_IGNNVGR_	A0A380DXY3	Pyrimidine-nucleoside phosphorylase OS=Staphylococcus aureus OX=1280 GN=pdp PE=3 SV=1	2	365.204	0.72541	0.02553	92.692	1
1243	IGPYDKDENIDFLR	14	Unmodified	_IGPYDKDENIDFLR_	Q6XZ85	Serine-protein kinase RsbW OS=Staphylococcus aureus OX=1280 GN=rsbW PE=3 SV=1	3	565.618	-2.2154	2.3546e-05	102.52	1
1244	IGQQIFEKYGIR	12	malon(K)	_IGQQIFEK(ma)YGIR_	Q8NX44	Ornithine carbamoyltransferase OS=Staphylococcus aureus (strain MW2) OX=196620 GN=argF PE=3 SV=1	2	769.404	1.4286	0.0077449	68.972	1
1245	IGSFLLSESGYK	12	Unmodified	_IGSFLLSESGYK_	A0A6B0BXN0	RNA-binding virulence regulatory protein CvfB (Fragment) OS=Staphylococcus aureus OX=1280 GN=cvfB PE=4 SV=1	2	650.843		4.5719e-05	69.229	1
1246	IGSTFGK	7	Unmodified	_IGSTFGK_	T1YCT6	Putative cytosolic protein OS=Staphylococcus aureus subsp. aureus CN1 OX=1193576 GN=SAKOR_02139 PE=4 SV=1	2	355.198	0.66627	0.026894	81.297	1
1247	IGVHASSFNNPTFTEEQNK	19	Unmodified	_IGVHASSFNNPTFTEEQNK_	A0A6B5TUA1	DNA-directed RNA polymerase subunit beta OS=Staphylococcus aureus OX=1280 GN=rpoC PE=4 SV=1	3	707.34	1.8186	2.588e-08	102.36	1
1248	IGVHASSFNNPTFTEEQNKK	20	Unmodified	_IGVHASSFNNPTFTEEQNKK_	A0A6B5TUA1	DNA-directed RNA polymerase subunit beta OS=Staphylococcus aureus OX=1280 GN=rpoC PE=4 SV=1	4	562.78	2.303	6.5017e-08	106.57	1
1249	IHAIEEAGEPLTPTR	15	Unmodified	_IHAIEEAGEPLTPTR_	Q2G1U3	Oligoendopeptidase F OS=Staphylococcus aureus (strain NCTC 8325) OX=93061 GN=SAOUHSC_00937 PE=3 SV=1	2	817.431	1.5547	1.3954e-07	114.64	1
1250	IHDGELQEK	9	Unmodified	_IHDGELQEK_	W8TSY7	Aspartate--tRNA ligase OS=Staphylococcus aureus OX=1280 GN=aspS PE=3 SV=1	3	356.849	-2.3636	0.004525	65.224	1
1251	IHILEELPK	9	Unmodified	_IHILEELPK_	A0A380EBZ2	Myosin-cross-reactive antigen OS=Staphylococcus aureus OX=1280 GN=NCTC10702_00249 PE=4 SV=1	3	364.553	0.29091	0.018988	40.352	1
1252	IHLVGDEIANGQGIGR	16	Deamidation (NQ)	_IHLVGDEIAN(de)GQGIGR_	W8UX29	Pyruvate kinase OS=Staphylococcus aureus OX=1280 GN=pyk PE=3 SV=1	3	550.625	1.7807	0.001576	66.215	1
1253	IHLVGDEIANGQGIGR	16	Deamidation (NQ)	_IHLVGDEIAN(de)GQGIGR_	W8UX29	Pyruvate kinase OS=Staphylococcus aureus OX=1280 GN=pyk PE=3 SV=1	2	825.434	0.7882	1.0931e-07	119.54	1
1254	IHLVGDEIANGQGIGR	16	Unmodified	_IHLVGDEIANGQGIGR_	W8UX29	Pyruvate kinase OS=Staphylococcus aureus OX=1280 GN=pyk PE=3 SV=1	3	550.297		0.0010137	47.622	1
1255	IHLVGDEIANGQGIGR	16	Unmodified	_IHLVGDEIANGQGIGR_	W8UX29	Pyruvate kinase OS=Staphylococcus aureus OX=1280 GN=pyk PE=3 SV=1	3	550.297	-0.015221	8.5247e-05	88.075	1
1256	IHLVGDEIANGQGIGR	16	Unmodified	_IHLVGDEIANGQGIGR_	W8UX29	Pyruvate kinase OS=Staphylococcus aureus OX=1280 GN=pyk PE=3 SV=1	2	824.942	-0.75652	2.0262e-17	133.47	1
1257	IHTPSQMGIR	10	Unmodified	_IHTPSQMGIR_	Q6GHQ0	Cell division protein FtsA OS=Staphylococcus aureus (strain MRSA252) OX=282458 GN=ftsA PE=1 SV=1	3	380.538	-1.0585	0.015689	42.348	1
1258	IHTPSQMGIR	10	Unmodified	_IHTPSQMGIR_	Q6GHQ0	Cell division protein FtsA OS=Staphylococcus aureus (strain MRSA252) OX=282458 GN=ftsA PE=1 SV=1	2	570.303	0.36356	0.00033747	117.01	1
1259	IIASNDLDEETITSLK	16	Unmodified	_IIASNDLDEETITSLK_	A0A380EL27	NH(3)-dependent NAD(+) synthetase OS=Staphylococcus aureus OX=1280 GN=nadE PE=3 SV=1	2	881.459	1.9613	0.0001578	92.38	1
1260	IIEGTAR	7	Unmodified	_IIEGTAR_	Q9AGS5	50S ribosomal protein L11 OS=Staphylococcus aureus OX=1280 GN=rplK PE=3 SV=1	2	380.222	1.2609	0.025556	94.777	1
1261	IIELPITSSFR	11	Unmodified	_IIELPITSSFR_	A0A6B5TUA1	DNA-directed RNA polymerase subunit beta OS=Staphylococcus aureus OX=1280 GN=rpoC PE=4 SV=1	2	638.369	-3.278	0.0034691	77.062	1
1262	IIELYAECIR	10	Unmodified	_IIELYAECIR_	W5TZ48	Neomycin phosphotransferase III (Fragment) OS=Staphylococcus aureus OX=1280 PE=4 SV=1	2	640.339	-1.8373	0.0030471	83.862	1
1263	IIEQIGTYNPTSANAPEIK	19	Unmodified	_IIEQIGTYNPTSANAPEIK_	W8U6K4	30S ribosomal protein S16 OS=Staphylococcus aureus OX=1280 GN=rpsP PE=1 SV=1	3	687.028	-2.0833	6.9597e-12	119.8	1
1264	IIEQIGTYNPTSANAPEIK	19	Unmodified	_IIEQIGTYNPTSANAPEIK_	W8U6K4	30S ribosomal protein S16 OS=Staphylococcus aureus OX=1280 GN=rpsP PE=1 SV=1	2	1030.04	-0.6591	3.0749e-37	169.58	1
1265	IIEQIGTYNPTSANAPEIK	19	Unmodified	_IIEQIGTYNPTSANAPEIK_	W8U6K4	30S ribosomal protein S16 OS=Staphylococcus aureus OX=1280 GN=rpsP PE=1 SV=1	3	687.028	-1.8215	0.0032994	45.138	1
1266	IIEQIGTYNPTSANAPEIK	19	Unmodified	_IIEQIGTYNPTSANAPEIK_	W8U6K4	30S ribosomal protein S16 OS=Staphylococcus aureus OX=1280 GN=rpsP PE=1 SV=1	2	1030.04	-2.3261	0.00026185	75.334	1
1267	IILAADVGGTTCK	13	Unmodified	_IILAADVGGTTCK_	A0A2S6DT44	Glucokinase OS=Staphylococcus aureus OX=1280 GN=glcK PE=4 SV=1	2	659.855	2.2048	0.0015866	84.297	1
1268	IINEIGGIKK	10	Deamidation (NQ)	_IIN(de)EIGGIKK_	A0A1U9ZC18	Beta-lactamase (Fragment) OS=Staphylococcus aureus OX=1280 GN=blaZ PE=3 SV=1	2	543.332	2.2108	0.019658	50.353	1
1269	IINEPTAAALAYGLDK	16	Unmodified	_IINEPTAAALAYGLDK_	A0A6B5UN24	Molecular chaperone DnaK OS=Staphylococcus aureus OX=1280 GN=dnaK PE=4 SV=1	2	830.451	2.4783	0.00047205	84.653	1
1270	IINEPTAAALAYGLDK	16	Unmodified	_IINEPTAAALAYGLDK_	A0A6B5UN24	Molecular chaperone DnaK OS=Staphylococcus aureus OX=1280 GN=dnaK PE=4 SV=1	2	830.451	1.5613	0.00020104	91.317	1
1271	IINGHTPVK	9	Deamidation (NQ)	_IIN(de)GHTPVK_	A0A380DZI2	Fructose-1,6-bisphosphatase class 3 OS=Staphylococcus aureus OX=1280 GN=fbp_2 PE=3 SV=1	2	490.282		0.012201	55.908	1
1272	IIPEDTVVFSSSPIPGNTK	19	Unmodified	_IIPEDTVVFSSSPIPGNTK_	A0A6B5IWQ1	Ribonuclease J (Fragment) OS=Staphylococcus aureus OX=1280 GN=G0Y39_12630 PE=4 SV=1	2	1001.03	-0.34414	0.0078421	52.185	1
1273	IIQEYQDAEGNLK	13	Unmodified	_IIQEYQDAEGNLK_	A0A6B5B7N3	Glutamine--fructose-6-phosphate transaminase (Isomerizing) OS=Staphylococcus aureus OX=1280 GN=glmS PE=4 SV=1	2	760.883	-1.0843	0.00011721	100.22	1
1274	IIQEYQDAEGNLK	13	Unmodified	_IIQEYQDAEGNLK_	A0A6B5B7N3	Glutamine--fructose-6-phosphate transaminase (Isomerizing) OS=Staphylococcus aureus OX=1280 GN=glmS PE=4 SV=1	3	507.591	-1.998	0.014917	38.674	1
1275	IIQQLYQSELIK	12	Unmodified	_IIQQLYQSELIK_	Q9AIU7	DNA ligase OS=Staphylococcus aureus OX=1280 GN=ligA PE=1 SV=1	2	738.427	-3.268	0.004496	69.229	1
1276	IISCHIGNGASIAAIDGGK	19	Unmodified	_IISCHIGNGASIAAIDGGK_	T1Y9R0	Acetate kinase OS=Staphylococcus aureus subsp. aureus CN1 OX=1193576 GN=ackA PE=3 SV=1	3	618.656	-0.29337	2.6978e-05	79.676	1
1277	IISCHIGNGASIAAIDGGK	19	Deamidation (NQ)	_IISCHIGN(de)GASIAAIDGGK_	T1Y9R0	Acetate kinase OS=Staphylococcus aureus subsp. aureus CN1 OX=1193576 GN=ackA PE=3 SV=1	3	618.984	2.2712	2.8782e-10	110.6	1
1278	IISCHIGNGASIAAIDGGK	19	Deamidation (NQ)	_IISCHIGN(de)GASIAAIDGGK_	T1Y9R0	Acetate kinase OS=Staphylococcus aureus subsp. aureus CN1 OX=1193576 GN=ackA PE=3 SV=1	2	927.973	0.85019	1.5291e-18	139.11	1
1279	IITEGAGALPTAAILSGK	18	Unmodified	_IITEGAGALPTAAILSGK_	A0A658B9J9	L-threonine dehydratase catabolic TdcB OS=Staphylococcus aureus OX=1280 GN=DDL17_15820 PE=3 SV=1	2	841.988	-1.9302	0.00031916	79.489	1
1280	IITEGAGALPTAAILSGK	18	Unmodified	_IITEGAGALPTAAILSGK_	A0A658B9J9	L-threonine dehydratase catabolic TdcB OS=Staphylococcus aureus OX=1280 GN=DDL17_15820 PE=3 SV=1	2	841.988	-1.0661	0.00076971	73.138	1
1281	IIVEIGQPVQR	11	Unmodified	_IIVEIGQPVQR_	A0A6B5TUA1	DNA-directed RNA polymerase subunit beta OS=Staphylococcus aureus OX=1280 GN=rpoC PE=4 SV=1	2	626.375	-1.8796	0.0042407	73.885	1
1282	IKDDTLYCYTEDSIK	15	Unmodified	_IKDDTLYCYTEDSIK_	A0A0S3DZ24	UPF0738 protein BN1321_210009 OS=Staphylococcus aureus OX=1280 GN=BN1321_210009 PE=3 SV=1	3	621.961	1.1294	0.0022362	58.723	1
1283	IKDIYESMEEIADK	14	Unmodified	_IKDIYESMEEIADK_	A0A380EGW3	Phosphate transport regulator, putative OS=Staphylococcus aureus OX=1280 GN=NCTC10702_01131 PE=4 SV=1	3	561.943	-1.567	0.0016895	65.374	1
1284	IKEAILTIGEK	11	malon(K)	_IK(ma)EAILTIGEK_	A0A6B1RWP0	Elongation factor Ts OS=Staphylococcus aureus OX=1280 GN=GAY51_11945 PE=4 SV=1	2	650.872	2.7722	0.014341	66.246	1
1285	IKEFGTSNR	9	malon(K)	_IK(ma)EFGTSNR_	A0A6B0BAU5	Ketose-bisphosphate aldolase (Fragment) OS=Staphylococcus aureus OX=1280 GN=GO793_02780 PE=4 SV=1	2	569.28	-0.57103	0.0058614	89.301	1
1286	IKPIGTLDDGR	11	Unmodified	_IKPIGTLDDGR_	Q6GGY2	DegV domain-containing protein SAR1438 OS=Staphylococcus aureus (strain MRSA252) OX=282458 GN=SAR1438 PE=3 SV=1	3	395.559	-1.6215	0.02321	34.264	1
1287	IKTDVISK	8	malon(K)	_IK(ma)TDVISK_	A0A6B5IWQ1	Ribonuclease J (Fragment) OS=Staphylococcus aureus OX=1280 GN=G0Y39_12630 PE=4 SV=1	2	495.279	-1.428	0.030984	76.165	1
1288	IKVEELDPENNR	12	Unmodified	_IKVEELDPENNR_	Q6GGT5	30S ribosomal protein S1 OS=Staphylococcus aureus (strain MRSA252) OX=282458 GN=rpsA PE=3 SV=1	3	485.919	-1.182	0.015635	40.377	1
1289	ILDGLQTGKFMNHIK	15	malon(K)	_ILDGLQTGK(ma)FMNHIK_	A0A5C8X1Y9	2-oxo acid dehydrogenase subunit E2 (Fragment) OS=Staphylococcus aureus OX=1280 GN=FVP29_19450 PE=4 SV=1	3	600.982	1.2045	0.0012452	75.911	1
1290	ILDNNEGVLTELGAVNASTGK	21	Unmodified	_ILDNNEGVLTELGAVNASTGK_	A0A6B0BLJ6	Phosphoenolpyruvate carboxykinase (ATP) (Fragment) OS=Staphylococcus aureus OX=1280 GN=pckA PE=4 SV=1	3	705.702	2.2471	8.5174e-09	98.543	1
1291	ILDTAGQKGTGK	12	malon(K)	_ILDTAGQK(ma)GTGK_	A0A6B0BDT6	NADP-dependent phosphogluconate dehydrogenase (Fragment) OS=Staphylococcus aureus OX=1280 GN=gndA PE=4 SV=1	2	637.833	0.65456	2.3309e-08	136.83	1
1292	ILEEANVSADTR	12	Unmodified	_ILEEANVSADTR_	W8U8U6	30S ribosomal protein S13 OS=Staphylococcus aureus OX=1280 GN=rpsM PE=1 SV=1	2	659.336	1.0006	0.0041739	54.871	1
1293	ILEGQDITLPELGR	14	Unmodified	_ILEGQDITLPELGR_	A0A0E1XI24	Uncharacterized protein OS=Staphylococcus aureus subsp. aureus MN8 OX=548470 GN=HMPREF0769_11621 PE=4 SV=1	2	777.43	0.98599	0.00010295	101.3	1
1294	ILFEVAGVSEEVAR	14	Unmodified	_ILFEVAGVSEEVAR_	T1YBR8	50S ribosomal protein L16 OS=Staphylococcus aureus subsp. aureus CN1 OX=1193576 GN=rplP PE=3 SV=1	2	759.912	0.83966	0.0080502	59.709	1
1295	ILGSSLNELLK	11	Unmodified	_ILGSSLNELLK_	A0A6B0CMV4	GTP-sensing pleiotropic transcriptional regulator CodY (Fragment) OS=Staphylococcus aureus OX=1280 GN=codY PE=4 SV=1	2	593.856	2.1722	0.00435	73.435	1
1296	ILHLTSEEIPHAIGVNVDR	19	Unmodified	_ILHLTSEEIPHAIGVNVDR_	A0A380E475	GTPase Era OS=Staphylococcus aureus OX=1280 GN=bex_1 PE=3 SV=1	4	529.04	-0.55649	3.3229e-05	78.441	1
1297	ILNGESTEEFEYVDR	15	Deamidation (NQ)	_ILN(de)GESTEEFEYVDR_	A0A2X2JYX5	NADH dehydrogenase OS=Staphylococcus aureus OX=1280 GN=NCTC7878_00625 PE=4 SV=1	2	901.41	2.7143	0.0010674	100.43	1
1298	ILNGESTEEFEYVDR	15	Unmodified	_ILNGESTEEFEYVDR_	A0A2X2JYX5	NADH dehydrogenase OS=Staphylococcus aureus OX=1280 GN=NCTC7878_00625 PE=4 SV=1	2	900.918	-1.7981	1.0402e-23	159.18	1
1299	ILPFDANNIK	10	Unmodified	_ILPFDANNIK_	A0A5C8X744	UDP-N-acetylmuramate--L-alanine ligase (Fragment) OS=Staphylococcus aureus OX=1280 GN=FVP29_10115 PE=4 SV=1	2	572.822		0.0056445	60.398	1
1300	ILSGELDSQTGHVSLGK	17	Unmodified	_ILSGELDSQTGHVSLGK_	W8TWE8	ABC efflux transporter (ATP-binding protein) OS=Staphylococcus aureus OX=1280 GN=ykpA PE=4 SV=1	3	580.976	0.083588	0.0013302	61.265	1
1301	ILSQEDYFDK	10	Unmodified	_ILSQEDYFDK_	A0A6B5I3U4	Transcriptional regulator (Fragment) OS=Staphylococcus aureus OX=1280 GN=G0V76_13030 PE=4 SV=1	2	629.304	3.5192	0.00060357	95.483	1
1302	ILSQEDYFDKK	11	malon(K)	_ILSQEDYFDK(ma)K_	A0A6B5I3U4	Transcriptional regulator (Fragment) OS=Staphylococcus aureus OX=1280 GN=G0V76_13030 PE=4 SV=1	2	736.351	0.16983	0.013395	57.434	1
1303	ILTGEIPSFK	10	Unmodified	_ILTGEIPSFK_	W8U4X1	Adenosine 5'-monophosphoramidase OS=Staphylococcus aureus OX=1280 GN=hinT PE=4 SV=1	2	552.819	-0.81904	0.011016	57.149	1
1304	ILVVGAEK	8	Unmodified	_ILVVGAEK_	W8TS62	Probable manganese-dependent inorganic pyrophosphatase OS=Staphylococcus aureus OX=1280 GN=ppaC PE=3 SV=1	2	414.763	0.82313	0.017496	77.732	1
1305	ILYGLNEQGMTPDK	14	Unmodified	_ILYGLNEQGMTPDK_	A0A6B5I2R8	DNA gyrase subunit A OS=Staphylococcus aureus OX=1280 GN=gyrA PE=4 SV=1	2	789.895	0.14353	0.0063709	64.244	1
1306	ILYSAFDLVEQR	12	Unmodified	_ILYSAFDLVEQR_	T1Y6H5	30S ribosomal protein S7 OS=Staphylococcus aureus subsp. aureus CN1 OX=1193576 GN=rpsG PE=3 SV=1	2	727.388	1.1547	0.0020048	79.492	1
1307	ILYSAFDLVEQR	12	Unmodified	_ILYSAFDLVEQR_	T1Y6H5	30S ribosomal protein S7 OS=Staphylococcus aureus subsp. aureus CN1 OX=1193576 GN=rpsG PE=3 SV=1	3	485.261	1.6175	0.0037628	57.175	1
1308	IMDAADYEVSQAIK	14	Oxidation (M)	_IM(ox)DAADYEVSQAIK_	T1Y894	Hexulose-6-phosphate synthase OS=Staphylococcus aureus subsp. aureus CN1 OX=1193576 GN=SAKOR_00559 PE=4 SV=1	2	785.377	0.43303	0.0031143	63.29	1
1309	IMDAADYEVSQAIK	14	Unmodified	_IMDAADYEVSQAIK_	T1Y894	Hexulose-6-phosphate synthase OS=Staphylococcus aureus subsp. aureus CN1 OX=1193576 GN=SAKOR_00559 PE=4 SV=1	2	777.379	1.7672	2.6538e-07	113.37	1
1310	INDINDLVNATFQVK	15	Unmodified	_INDINDLVNATFQVK_	Q9F0R1	HTH-type transcriptional regulator SarR OS=Staphylococcus aureus (strain NCTC 8325) OX=93061 GN=sarR PE=1 SV=3	2	852.452	0.33637	1.2387e-07	115.26	1
1311	INDINDLVNATFQVKK	16	malon(K)	_INDINDLVNATFQVK(ma)K_	Q9F0R1	HTH-type transcriptional regulator SarR OS=Staphylococcus aureus (strain NCTC 8325) OX=93061 GN=sarR PE=1 SV=3	3	640.002	-1.5547	0.0004606	73.928	1
1312	INDIYDGEGVTEAVR	15	Unmodified	_INDIYDGEGVTEAVR_	W8TSV1	Phosphopentomutase OS=Staphylococcus aureus OX=1280 GN=drm PE=3 SV=1	2	825.902	-1.2012	1.4885e-11	123.02	1
1313	INEIIDETGVK	11	Unmodified	_INEIIDETGVK_	W8UB98	Polyribonucleotide nucleotidyltransferase OS=Staphylococcus aureus OX=1280 GN=pnpA PE=3 SV=1	2	615.832	1.0099	0.00015338	99.732	1
1314	INELQQLADENEEK	14	Unmodified	_INELQQLADENEEK_	A0A380E4E8	Protein GrpE OS=Staphylococcus aureus OX=1280 GN=grpE PE=3 SV=1	2	836.905	1.5487	1.4912e-11	125.73	1
1315	INEQYQISK	9	Unmodified	_INEQYQISK_	A0A5C8X3E4	Malate dehydrogenase (quinone) (Fragment) OS=Staphylococcus aureus OX=1280 GN=FVP29_17045 PE=3 SV=1	2	561.793	0.046383	0.0082961	67.334	1
1316	INEVYGQYFNEHKPAR	16	Unmodified	_INEVYGQYFNEHKPAR_	A0A6B5UC34	RidA family protein OS=Staphylococcus aureus OX=1280 GN=G0X17_13645 PE=4 SV=1	4	491.996	0.91901	0.0017518	61.265	1
1317	INEYTGSNNEEK	12	Unmodified	_INEYTGSNNEEK_	X5E0H3	Uncharacterized protein OS=Staphylococcus aureus OX=1280 GN=BN1321_260262 PE=4 SV=1	2	699.313	-1.4254	4.0309e-16	168.02	1
1318	INFDDNALFR	10	Unmodified	_INFDDNALFR_	A0A6B5K1Z1	ADP-forming succinate--CoA ligase subunit beta OS=Staphylococcus aureus OX=1280 GN=sucC PE=4 SV=1	2	612.804		0.017144	46.844	1
1319	INHLTDEQK	9	Unmodified	_INHLTDEQK_	A0A658B9J9	L-threonine dehydratase catabolic TdcB OS=Staphylococcus aureus OX=1280 GN=DDL17_15820 PE=3 SV=1	3	366.524	-1.5541	0.0024089	74.92	1
1320	INHLTDEQK	9	Unmodified	_INHLTDEQK_	A0A658B9J9	L-threonine dehydratase catabolic TdcB OS=Staphylococcus aureus OX=1280 GN=DDL17_15820 PE=3 SV=1	2	549.283	-1.7113	0.005057	83.948	1
1321	INIAIHTGK	9	Unmodified	_INIAIHTGK_	T1YAQ4	30S ribosomal protein S3 OS=Staphylococcus aureus subsp. aureus CN1 OX=1193576 GN=rpsC PE=3 SV=1	2	483.79	1.8341	0.0046156	85.533	1
1322	INILDTPGHADFGGEVER	18	Unmodified	_INILDTPGHADFGGEVER_	A0A6B0B4S1	Translational GTPase TypA (Fragment) OS=Staphylococcus aureus OX=1280 GN=typA PE=4 SV=1	3	647.322	1.1696	0.0019276	54.964	1
1323	INISDEAIEAAVK	13	Unmodified	_INISDEAIEAAVK_	A0A6B0A7W0	AAA domain-containing protein OS=Staphylococcus aureus OX=1280 GN=GO651_14495 PE=4 SV=1	2	686.87	0.95499	0.010458	59.248	1
1324	INITNLIR	8	2 Deamidation (NQ)	_IN(de)ITN(de)LIR_	A0A6B5KG77	Uncharacterized protein (Fragment) OS=Staphylococcus aureus OX=1280 GN=G0Y22_14075 PE=4 SV=1	2	479.782	2.5569	0.029744	71.501	1
1325	INNALVIDVPK	11	Unmodified	_INNALVIDVPK_	W8UW00	ATP synthase subunit beta OS=Staphylococcus aureus OX=1280 GN=atpD PE=3 SV=1	2	598.356	-0.41909	0.0009011	90.689	1
1326	INNKLEKQK	9	3 Deamidation (NQ),malon(K)	_IN(de)N(de)K(ma)LEKQ(de)K_	A0A6D2H3K1	Phage tail tape measure protein OS=Staphylococcus aureus OX=1280 GN=SAMEA2080329_02483 PE=4 SV=1	2	602.309		0.016831	45.661	1
1327	INNLKENGYLK	11	2 Deamidation (NQ)	_IN(de)N(de)LKENGYLK_	A0A6B5U7B0	Helix-turn-helix domain-containing protein OS=Staphylococcus aureus OX=1280 GN=G0V90_11245 PE=4 SV=1	2	654.346	2.9948	0.014041	64.82	1
1328	INNNAPYQFVDIK	13	Unmodified	_INNNAPYQFVDIK_	W8TUM1	UDP-N-acetylglucosamine 1-carboxyvinyltransferase OS=Staphylococcus aureus OX=1280 GN=murZ PE=3 SV=1	2	768.396	2.0031	0.0038389	71.513	1
1329	INNQTVTLQDLR	12	Unmodified	_INNQTVTLQDLR_	A0A6B0CTE6	AAA family ATPase (Fragment) OS=Staphylococcus aureus OX=1280 GN=GO941_08055 PE=4 SV=1	2	707.886	-1.5595	0.0001124	100.38	1
1330	INPDLIGGFR	10	Unmodified	_INPDLIGGFR_	W8U472	ATP synthase subunit delta OS=Staphylococcus aureus OX=1280 GN=atpH PE=3 SV=1	2	551.306	2.0071	0.0027205	85.355	1
1331	INTVGDAVK	9	Unmodified	_INTVGDAVK_	T1YA07	Acyl carrier protein OS=Staphylococcus aureus subsp. aureus CN1 OX=1193576 GN=acpP PE=3 SV=1	2	458.759	2.4043	0.020946	62.558	1
1332	INTVGDAVKFINSLEK	16	Unmodified	_INTVGDAVKFINSLEK_	T1YA07	Acyl carrier protein OS=Staphylococcus aureus subsp. aureus CN1 OX=1193576 GN=acpP PE=3 SV=1	3	583.324	-0.23441	0.004524	51.235	1
1333	INVIKNLVNIADK	13	malon(K)	_INVIK(ma)NLVNIADK_	A0A6C1EUG3	Phosphoglycerate kinase OS=Staphylococcus aureus OX=1280 GN=GZ067_05860 PE=4 SV=1	2	770.441	-2.4269	5.9123e-12	142.91	1
1334	INVNTENQIASAK	13	Unmodified	_INVNTENQIASAK_	A0A6B0BAU5	Ketose-bisphosphate aldolase (Fragment) OS=Staphylococcus aureus OX=1280 GN=GO793_02780 PE=4 SV=1	2	701.37	-2.2318	5.3144e-12	141.73	1
1335	INVNTENQIASAK	13	Unmodified	_INVNTENQIASAK_	A0A6B0BAU5	Ketose-bisphosphate aldolase (Fragment) OS=Staphylococcus aureus OX=1280 GN=GO793_02780 PE=4 SV=1	2	701.37	-2.4328	0.028501	47.774	1
1336	INVNTENQIASAKAVR	16	malon(K)	_INVNTENQIASAK(ma)AVR_	A0A6B0BAU5	Ketose-bisphosphate aldolase (Fragment) OS=Staphylococcus aureus OX=1280 GN=GO793_02780 PE=4 SV=1	2	907.474	1.0157	1.6363e-24	160.55	1
1337	IPAVQEAIKK	10	malon(K)	_IPAVQEAIK(ma)K_	A0A033UZD3	Chaperone protein DnaK OS=Staphylococcus aureus C0673 OX=1413510 GN=dnaK PE=2 SV=1	2	591.84	1.8552	0.029992	50.452	1
1338	IPELCSK	7	Unmodified	_IPELCSK_	A0A2X2JYX5	NADH dehydrogenase OS=Staphylococcus aureus OX=1280 GN=NCTC7878_00625 PE=4 SV=1	2	423.723	1.6917	0.016859	107.59	1
1339	IPIVNTKGESTIPLIK	16	malon(K)	_IPIVNTK(ma)GESTIPLIK_	A0A380ELR3	Transaldolase OS=Staphylococcus aureus OX=1280 GN=tal PE=4 SV=1	2	905.022	2.2614	6.3391e-12	128.79	1
1340	IPMNGDDEVQK	11	Oxidation (M)	_IPM(ox)NGDDEVQK_	A0A1Q8DG05	Valine--tRNA ligase OS=Staphylococcus aureus OX=1280 GN=valS PE=3 SV=1	3	421.196	1.657	0.02723	40.727	1
1341	IPMNGNDEEQK	11	Oxidation (M)	_IPM(ox)NGNDEEQK_	A0A6B5MHG9	Valine--tRNA ligase OS=Staphylococcus aureus OX=1280 GN=G0X47_01375 PE=4 SV=1	2	645.785	0.17578	0.0030662	68.355	1
1342	IPNLISDDVPQGESDEDNVEVK	22	Unmodified	_IPNLISDDVPQGESDEDNVEVK_	A0A0U1MFX6	Serine--tRNA ligase OS=Staphylococcus aureus OX=1280 GN=serS PE=3 SV=1	3	804.719	-2.3599	1.6591e-14	114.37	1
1343	IPSYGESLIEDEK	13	Unmodified	_IPSYGESLIEDEK_	A0A2X2JT55	Malate:quinone oxidoreductase 2 OS=Staphylococcus aureus OX=1280 GN=mqo2_1 PE=4 SV=1	2	740.364	0.57246	0.0051782	68.044	1
1344	IPSYGESLIEDEK	13	Unmodified	_IPSYGESLIEDEK_	A0A2X2JT55	Malate:quinone oxidoreductase 2 OS=Staphylococcus aureus OX=1280 GN=mqo2_1 PE=4 SV=1	3	493.912	0.20481	0.014569	39.006	1
1345	IPTGTIDITYFR	12	Unmodified	_IPTGTIDITYFR_	A0A380EIY1	Bifunctional protein PyrR OS=Staphylococcus aureus OX=1280 GN=pyrR PE=3 SV=1	2	698.877	-0.26601	0.013913	58.098	1
1346	IPTSEIKNITQDQDIHAVPK	20	malon(K)	_IPTSEIK(ma)NITQDQDIHAVPK_	T1YCT6	Putative cytosolic protein OS=Staphylococcus aureus subsp. aureus CN1 OX=1193576 GN=SAKOR_02139 PE=4 SV=1	3	778.404	0.82588	0.0014267	57.692	1
1347	IPVIHTLPAKTIIPDDHPYSIGNLGK	26	malon(K)	_IPVIHTLPAK(ma)TIIPDDHPYSIGNLGK_	A0A1Q8DH79	Pyruvate oxidase OS=Staphylococcus aureus OX=1280 GN=BSZ10_01180 PE=3 SV=1	4	724.646	-0.11212	8.9362e-06	57.21	1
1348	IPYQIVVGDK	10	Unmodified	_IPYQIVVGDK_	W8TVM8	Threonine--tRNA ligase OS=Staphylococcus aureus OX=1280 GN=thrS PE=3 SV=1	2	566.324	0.7661	0.018391	60.255	1
1349	IPYQIVVGDKEVENNQVNVR	20	Unmodified	_IPYQIVVGDKEVENNQVNVR_	W8TVM8	Threonine--tRNA ligase OS=Staphylococcus aureus OX=1280 GN=thrS PE=3 SV=1	3	771.745	-0.6424	1.2716e-06	85.087	1
1350	IQELFEAR	8	Unmodified	_IQELFEAR_	A0A033UHR6	DNA-directed RNA polymerase subunit beta' OS=Staphylococcus aureus C0673 OX=1413510 GN=rpoC PE=3 SV=1	2	503.272	0.75218	0.011471	93.649	1
1351	IQGTLIKK	8	malon(K)	_IQGTLIK(ma)K_	A0A6B1RLG9	Zinc-binding dehydrogenase OS=Staphylococcus aureus OX=1280 GN=GAY51_01625 PE=4 SV=1	2	493.798	-0.22035	0.026974	59.908	1
1352	IQIAAFKK	8	malon(K)	_IQIAAFK(ma)K_	A0A033UAF5	Helicase ATP-binding domain-containing protein OS=Staphylococcus aureus C0673 OX=1413510 GN=V070_02653 PE=4 SV=1	2	502.792		0.017729	48.346	1
1353	IQKDTDRDNFLTAEEAK	17	malon(K)	_IQK(ma)DTDRDNFLTAEEAK_	T1Y764	ATP-dependent Clp protease proteolytic subunit OS=Staphylococcus aureus subsp. aureus CN1 OX=1193576 GN=clpP PE=3 SV=1	3	693.999	0.87057	4.51e-06	102.07	1
1354	IQKENETNK	9	2 Deamidation (NQ)	_IQ(de)KEN(de)ETNK_	A0A1Q8DE80	Protein GrpE OS=Staphylococcus aureus OX=1280 GN=grpE PE=3 SV=1	3	369.184	0.88	0.016206	51.193	1
1355	IQSFVNSYDK	10	Unmodified	_IQSFVNSYDK_	Q2G1U3	Oligoendopeptidase F OS=Staphylococcus aureus (strain NCTC 8325) OX=93061 GN=SAOUHSC_00937 PE=3 SV=1	2	600.798	1.9407	0.00040185	120.06	1
1356	IQSQVTIEDGFENAPR	16	Unmodified	_IQSQVTIEDGFENAPR_	A0A6B1RLG9	Zinc-binding dehydrogenase OS=Staphylococcus aureus OX=1280 GN=GAY51_01625 PE=4 SV=1	2	902.447	-0.68447	0.00012342	93.226	1
1357	IQVEHPVTEMVTGIDLVK	18	Unmodified	_IQVEHPVTEMVTGIDLVK_	A0A5C8X3W8	Acetyl-CoA carboxylase biotin carboxylase subunit (Fragment) OS=Staphylococcus aureus OX=1280 GN=FVP29_16205 PE=4 SV=1	3	670.031	1.9309	0.0041606	45.237	1
1358	IQYGGSVKPNNIK	13	malon(K)	_IQYGGSVK(ma)PNNIK_	A0A6B1RNF5	Triose-phosphate isomerase OS=Staphylococcus aureus OX=1280 GN=GAY51_03870 PE=4 SV=1	2	752.394	0.2334	6.9907e-05	104.9	1
1359	IQYGGSVKPNNIK	13	Unmodified	_IQYGGSVKPNNIK_	A0A6B1RNF5	Triose-phosphate isomerase OS=Staphylococcus aureus OX=1280 GN=GAY51_03870 PE=4 SV=1	3	473.265	-1.5328	0.029541	26.711	1
1360	IRPVISSDYYGK	12	Unmodified	_IRPVISSDYYGK_	W8UYF2	DNA-directed RNA polymerase subunit omega OS=Staphylococcus aureus OX=1280 GN=rpoZ PE=3 SV=1	3	466.586	0.38521	0.0003116	85.522	1
1361	IRPVISSDYYGK	12	Unmodified	_IRPVISSDYYGK_	W8UYF2	DNA-directed RNA polymerase subunit omega OS=Staphylococcus aureus OX=1280 GN=rpoZ PE=3 SV=1	2	699.375	-0.033299	0.0020109	90.861	1
1362	ISANISNMKDAQTK	14	Deamidation (NQ),malon(K)	_ISAN(de)ISNMK(ma)DAQTK_	A0A033V3T9	Uncharacterized protein OS=Staphylococcus aureus C0673 OX=1413510 GN=V070_00320 PE=4 SV=1	2	804.383	-1.8433	0.0094199	77.185	1
1363	ISELEHDK	8	Unmodified	_ISELEHDK_	A0A6B5I265	ATP-dependent Clp protease ATP-binding subunit OS=Staphylococcus aureus OX=1280 GN=G0X69_04915 PE=4 SV=1	2	485.746	0.91672	0.015623	79.893	1
1364	ISGAAMTLLNDR	12	Unmodified	_ISGAAMTLLNDR_	A0A1Q8DGH4	Lipoate--protein ligase OS=Staphylococcus aureus OX=1280 GN=BSZ10_02140 PE=4 SV=1	2	631.332	3.5379	0.020335	44.847	1
1365	ISGVPIVDNK	10	Unmodified	_ISGVPIVDNK_	A0A5C8X421	Inosine-5'-monophosphate dehydrogenase (Fragment) OS=Staphylococcus aureus OX=1280 GN=guaB PE=3 SV=1	2	521.301	0.71714	0.0029489	84.31	1
1366	ISLISISNTVDK	12	Unmodified	_ISLISISNTVDK_	A0A6B5HWV6	Aminopeptidase P family protein OS=Staphylococcus aureus OX=1280 GN=G0X69_01445 PE=4 SV=1	2	645.369	-2.0587	0.003404	72.891	1
1367	ISLLNIGTEPAKGNSLTK	18	malon(K)	_ISLLNIGTEPAK(ma)GNSLTK_	A0A380E122	Phosphate acyltransferase OS=Staphylococcus aureus OX=1280 GN=plsX_2 PE=3 SV=1	2	971.528	0.56867	2.4339e-18	140.95	1
1368	ISLLNIGTEPAKGNSLTK	18	malon(K)	_ISLLNIGTEPAK(ma)GNSLTK_	A0A380E122	Phosphate acyltransferase OS=Staphylococcus aureus OX=1280 GN=plsX_2 PE=3 SV=1	3	648.021	0.75642	5.7089e-13	127.63	1
1369	ISNESPMAK	9	Unmodified	_ISNESPMAK_	W8UAB2	Transcription elongation factor GreA OS=Staphylococcus aureus OX=1280 GN=greA PE=3 SV=1	2	488.742	-2.374	0.011233	71.451	1
1370	ISNIKFLEQK	10	malon(K)	_ISNIK(ma)FLEQK_	A0A033V012	Uncharacterized protein OS=Staphylococcus aureus C0673 OX=1413510 GN=V070_00889 PE=4 SV=1	2	653.356	-0.63746	0.027048	61.958	1
1371	ISQALFSGDLK	11	Unmodified	_ISQALFSGDLK_	W8UX05	Tyrosine--tRNA ligase OS=Staphylococcus aureus OX=1280 GN=tyrS PE=3 SV=1	2	589.824	3.9037	0.0016928	85.554	1
1372	ISQIANYVNPNYALVSR	17	3 Deamidation (NQ)	_ISQ(de)IANYVN(de)PN(de)YALVSR_	A0A077UNC7	Glycerophosphoryl diester phosphodiesterase protein OS=Staphylococcus aureus OX=1280 GN=ugpQ_2 PE=4 SV=1	2	962.986	1.0527	0.0095739	51.727	1
1373	ISSGVGVER	9	Unmodified	_ISSGVGVER_	A0A0E1VS63	50S ribosomal protein L19 (Fragment) OS=Staphylococcus aureus subsp. aureus USA300_TCH959 OX=450394 GN=rplS PE=3 SV=1	2	452.248	2.4895	0.00026439	132.01	1
1374	ISVFSENNDIDAVGACVGAK	20	Unmodified	_ISVFSENNDIDAVGACVGAK_	A0A380DYD6	Transcription termination/antitermination protein NusA OS=Staphylococcus aureus OX=1280 GN=nusA PE=3 SV=1	2	1033.5	1.7664	0.00010351	77.871	1
1375	ISVPGMTECPNCGEYK	16	Oxidation (M)	_ISVPGM(ox)TECPNCGEYK_	T1Y9N1	50S ribosomal protein L32 OS=Staphylococcus aureus subsp. aureus CN1 OX=1193576 GN=rpmF PE=3 SV=1	2	929.394	-2.149	8.3287e-18	134.81	1
1376	ISVPGMTECPNCGEYK	16	Unmodified	_ISVPGMTECPNCGEYK_	T1Y9N1	50S ribosomal protein L32 OS=Staphylococcus aureus subsp. aureus CN1 OX=1193576 GN=rpmF PE=3 SV=1	2	921.397	-0.11999	3.9687e-05	98.281	1
1377	ISYDDAIEFLK	11	Unmodified	_ISYDDAIEFLK_	A0A5C8X8T5	Asparagine--tRNA ligase (Fragment) OS=Staphylococcus aureus OX=1280 GN=asnS PE=3 SV=1	2	657.335	2.8967	0.016793	58.172	1
1378	ITDYYLDHTDVK	12	Unmodified	_ITDYYLDHTDVK_	A0A6B5I265	ATP-dependent Clp protease ATP-binding subunit OS=Staphylococcus aureus OX=1280 GN=G0X69_04915 PE=4 SV=1	3	494.909	1.6341	0.0080032	48.568	1
1379	ITDYYLDHTDVK	12	Unmodified	_ITDYYLDHTDVK_	A0A6B5I265	ATP-dependent Clp protease ATP-binding subunit OS=Staphylococcus aureus OX=1280 GN=G0X69_04915 PE=4 SV=1	2	741.859	0.9324	0.0027296	76.073	1
1380	ITDYYLDHTDVK	12	Unmodified	_ITDYYLDHTDVK_	A0A6B5I265	ATP-dependent Clp protease ATP-binding subunit OS=Staphylococcus aureus OX=1280 GN=G0X69_04915 PE=4 SV=1	3	494.909	1.4394	0.015465	39.006	1
1381	ITEAIFR	7	Unmodified	_ITEAIFR_	T1Y5L6	L-lactate dehydrogenase OS=Staphylococcus aureus subsp. aureus CN1 OX=1193576 GN=ldh PE=3 SV=1	2	425.245	1.0339	0.018512	105.2	1
1382	ITEIDKQGR	9	malon(K)	_ITEIDK(ma)QGR_	W8UB98	Polyribonucleotide nucleotidyltransferase OS=Staphylococcus aureus OX=1280 GN=pnpA PE=3 SV=1	2	573.293	1.024	0.0022909	113.69	1
1383	ITHHPSGIVVNNQNER	16	Unmodified	_ITHHPSGIVVNNQNER_	A0A380EH73	Peptide chain release factor 2 OS=Staphylococcus aureus OX=1280 GN=prfB_3 PE=4 SV=1	3	605.647	-0.59116	4.2833e-06	103.66	1
1384	ITIDSATMMNK	11	Oxidation (M),Deamidation (NQ)	_ITIDSATM(ox)MN(de)K_	A0A033V6T8	1-deoxy-D-xylulose 5-phosphate reductoisomerase OS=Staphylococcus aureus C0673 OX=1413510 GN=dxr PE=3 SV=1	2	621.291	-2.0533	0.010002	67.207	1
1385	ITLLNGTDSR	10	Unmodified	_ITLLNGTDSR_	A0A5C8X5L7	Alpha/beta hydrolase (Fragment) OS=Staphylococcus aureus OX=1280 GN=FVP29_12910 PE=4 SV=1	2	545.299	-0.0067218	0.014135	54.259	1
1386	ITNYIQDLASHFHK	14	Unmodified	_ITNYIQDLASHFHK_	A0A6B1RH94	Arginine--tRNA ligase OS=Staphylococcus aureus OX=1280 GN=GAY51_04740 PE=4 SV=1	4	422.47	-1.2577	0.0057673	47.037	1
1387	ITVVPSDSIPADQEGMDIGPNTVK	24	Unmodified	_ITVVPSDSIPADQEGMDIGPNTVK_	A0A6C1EUG3	Phosphoglycerate kinase OS=Staphylococcus aureus OX=1280 GN=GZ067_05860 PE=4 SV=1	3	828.416	2.1412	3.2237e-12	98.3	1
1388	ITVVPSDSIPADQEGMDIGPNTVK	24	Unmodified	_ITVVPSDSIPADQEGMDIGPNTVK_	A0A6C1EUG3	Phosphoglycerate kinase OS=Staphylococcus aureus OX=1280 GN=GZ067_05860 PE=4 SV=1	2	1242.12	2.882	0.00026453	57.802	1
1389	ITYTMIGDPSQTITR	15	Oxidation (M)	_ITYTM(ox)IGDPSQTITR_	W8U1R6	Alkyl hydroperoxide reductase C OS=Staphylococcus aureus OX=1280 GN=ahpC PE=3 SV=1	2	856.93	-1.3128	8.4337e-08	112.96	1
1390	IVAFDINDDK	10	Unmodified	_IVAFDINDDK_	A0A6B1RIE9	Alcohol dehydrogenase AdhP OS=Staphylococcus aureus OX=1280 GN=adhP PE=4 SV=1	2	575.293	2.2318	0.0038271	81.017	1
1391	IVAILLDTK	9	Unmodified	_IVAILLDTK_	W8UX29	Pyruvate kinase OS=Staphylococcus aureus OX=1280 GN=pyk PE=3 SV=1	2	493.318	-1.4147	0.025687	58.699	1
1392	IVAILLDTKGPEIR	14	malon(K)	_IVAILLDTK(ma)GPEIR_	W8UX29	Pyruvate kinase OS=Staphylococcus aureus OX=1280 GN=pyk PE=3 SV=1	2	812.469	1.772	0.00019288	100.43	1
1393	IVATSFDEIFDGK	13	Unmodified	_IVATSFDEIFDGK_	W8TVL7	ATP-dependent 6-phosphofructokinase OS=Staphylococcus aureus OX=1280 GN=pfkA PE=3 SV=1	2	721.364	-0.32498	0.00057848	92.039	1
1394	IVAVQQGK	8	Unmodified	_IVAVQQGK_	A0A6D1RZG0	Pyridoxine biosynthesis amidotransferase OS=Staphylococcus aureus OX=1280 GN=pdxT PE=4 SV=1	2	421.758	1.1118	0.01599	79.469	1
1395	IVCTIGPASESEEMLEK	17	Oxidation (M)	_IVCTIGPASESEEM(ox)LEK_	A0A1Q8DD72	Pyruvate kinase OS=Staphylococcus aureus OX=1280 GN=BSZ10_08420 PE=3 SV=1	2	954.95	-0.57317	1.5249e-08	115.38	1
1396	IVCTIGPASESEEMLEK	17	Unmodified	_IVCTIGPASESEEMLEK_	A0A1Q8DD72	Pyruvate kinase OS=Staphylococcus aureus OX=1280 GN=BSZ10_08420 PE=3 SV=1	2	946.953	-0.76904	1.7007e-05	100.04	1
1397	IVEEVMNAVSIPVMAK	16	Oxidation (M)	_IVEEVMNAVSIPVM(ox)AK_	T1Y826	Pyridoxal 5'-phosphate synthase subunit PdxS OS=Staphylococcus aureus subsp. aureus CN1 OX=1193576 GN=pdxS PE=3 SV=1	3	582.644	0.6096	0.0035403	57.788	1
1398	IVEQQVR	7	Unmodified	_IVEQQVR_	A0A6B5I265	ATP-dependent Clp protease ATP-binding subunit OS=Staphylococcus aureus OX=1280 GN=G0X69_04915 PE=4 SV=1	2	436.253	1.4651	0.00315	126.24	1
1399	IVHTGDFKFDFTPVGK	16	malon(K)	_IVHTGDFK(ma)FDFTPVGK_	A0A0U1MK55	Ribonuclease J OS=Staphylococcus aureus OX=1280 GN=rnj PE=3 SV=1	3	631.984	1.0792	0.021027	40.242	1
1400	IVKLVTQQTK	10	malon(K)	_IVK(ma)LVTQQTK_	W8U472	ATP synthase subunit delta OS=Staphylococcus aureus OX=1280 GN=atpH PE=3 SV=1	2	622.366	0.075858	0.0081125	77.74	1
1401	IVLPEGEDER	10	Unmodified	_IVLPEGEDER_	W8USY9	Phosphate acetyltransferase OS=Staphylococcus aureus OX=1280 GN=eutD PE=4 SV=1	2	578.796	-0.5473	0.00067757	94.692	1
1402	IVLPVDTK	8	Unmodified	_IVLPVDTK_	W8TNG0	Phosphoglycerate kinase OS=Staphylococcus aureus OX=1280 GN=pgk PE=3 SV=1	2	442.776	1.2226	0.027794	66.692	1
1403	IVNEEALGYGK	11	Unmodified	_IVNEEALGYGK_	A0A3A3AQW1	Pyruvate oxidase OS=Staphylococcus aureus OX=1280 GN=cidC PE=3 SV=1	2	596.814	-2.1833	1.087e-05	107.06	1
1404	IVNEVDHVNR	10	Unmodified	_IVNEVDHVNR_	A0A380DLM1	GMP synthase [glutamine-hydrolyzing] OS=Staphylococcus aureus OX=1280 GN=guaA PE=3 SV=1	3	398.879	1.8463	0.022036	34.231	1
1405	IVNEVDHVNR	10	Unmodified	_IVNEVDHVNR_	A0A380DLM1	GMP synthase [glutamine-hydrolyzing] OS=Staphylococcus aureus OX=1280 GN=guaA PE=3 SV=1	2	597.815	1.7099	3.8136e-08	150.61	1
1406	IVNQQSSMPAITVALEK	17	Oxidation (M)	_IVNQQSSM(ox)PAITVALEK_	A0A6B1RKF6	Molybdopterin molybdenumtransferase MoeA OS=Staphylococcus aureus OX=1280 GN=GAY51_01205 PE=4 SV=1	2	922.993	0.89216	2.7413e-05	93.495	1
1407	IVPEEDMPYLPDGR	14	Unmodified	_IVPEEDMPYLPDGR_	R4R123	DNA-directed RNA polymerase subunit beta (Fragment) OS=Staphylococcus aureus OX=1280 GN=rpoB PE=3 SV=1	2	815.893	-1.0752	0.0030519	77.776	1
1408	IVQEQDNQR	9	Unmodified	_IVQEQDNQR_	A0A5C8X7T8	Type II pantothenate kinase (Fragment) OS=Staphylococcus aureus OX=1280 GN=FVP29_08250 PE=4 SV=1	2	565.283		0.0057223	73.233	1
1409	IVSADVQAQTK	11	Unmodified	_IVSADVQAQTK_	A0A6B5UC34	RidA family protein OS=Staphylococcus aureus OX=1280 GN=G0X17_13645 PE=4 SV=1	2	580.32	0.6597	0.0022895	81.92	1
1410	IVSESGTGAGVR	12	Unmodified	_IVSESGTGAGVR_	Q8NW87	Alanine--tRNA ligase OS=Staphylococcus aureus (strain MW2) OX=196620 GN=alaS PE=3 SV=1	2	566.801	-0.22345	0.0028003	75.739	1
1411	IVSGGTDNHLVAVDVK	16	Unmodified	_IVSGGTDNHLVAVDVK_	A0A380DUE7	Serine hydroxymethyltransferase OS=Staphylococcus aureus OX=1280 GN=glyA PE=3 SV=1	3	541.962	-0.23476	0.0050512	48.405	1
1412	IVSLAPEVL	9	Unmodified	_IVSLAPEVL_	T1YBA9	50S ribosomal protein L14 OS=Staphylococcus aureus subsp. aureus CN1 OX=1193576 GN=rplN PE=3 SV=1	2	470.789	-1.206	0.010528	72.789	1
1413	IVSLAPEVL	9	Unmodified	_IVSLAPEVL_	T1YBA9	50S ribosomal protein L14 OS=Staphylococcus aureus subsp. aureus CN1 OX=1193576 GN=rplN PE=3 SV=1	2	470.789	-0.15434	0.022988	60.895	1
1414	IVTETSEEELK	11	Unmodified	_IVTETSEEELK_	A0A2S6DFJ0	Lantibiotic ABC transporter ATP-binding protein (Fragment) OS=Staphylococcus aureus OX=1280 GN=CSC83_04910 PE=4 SV=1	2	639.327	-0.3465	0.0037709	75.819	1
1415	IVVALGGNALGKSPQEQLELVK	22	malon(K)	_IVVALGGNALGK(ma)SPQEQLELVK_	Q99UU0	Carbamate kinase 1 OS=Staphylococcus aureus (strain Mu50 / ATCC 700699) OX=158878 GN=arcC1 PE=3 SV=1	3	783.772	2.3366	2.5765e-06	79.426	1
1416	IVVNMGVGDAVQNSK	15	Oxidation (M)	_IVVNM(ox)GVGDAVQNSK_	W8TUC3	50S ribosomal protein L5 OS=Staphylococcus aureus OX=1280 GN=rplE PE=1 SV=1	2	773.898		8.8416e-35	131.96	1
1417	IWQSLPHEGDTIVK	14	Unmodified	_IWQSLPHEGDTIVK_	A0A6B5MHG9	Valine--tRNA ligase OS=Staphylococcus aureus OX=1280 GN=G0X47_01375 PE=4 SV=1	3	541.623	1.5985	0.019466	33.787	1
1418	IWQSLPHEGDTIVK	14	Unmodified	_IWQSLPHEGDTIVK_	A0A6B5MHG9	Valine--tRNA ligase OS=Staphylococcus aureus OX=1280 GN=G0X47_01375 PE=4 SV=1	2	811.93	0.64376	0.001734	85.837	1
1419	IYEMPLSAEEQALFDK	16	Unmodified	_IYEMPLSAEEQALFDK_	T1YCW9	L-lactate dehydrogenase OS=Staphylococcus aureus subsp. aureus CN1 OX=1193576 GN=ldh PE=3 SV=1	2	942.458	2.224	9.7541e-12	122.75	1
1420	IYGLDHKQVNTLGDDVK	17	malon(K)	_IYGLDHK(ma)QVNTLGDDVK_	A0A1Q8DF92	DUF697 domain-containing protein OS=Staphylococcus aureus OX=1280 GN=BSZ10_04765 PE=4 SV=1	3	667.669	0.071643	0.0017763	65.477	1
1421	IYGTAFFDK	9	Unmodified	_IYGTAFFDK_	W8TVM8	Threonine--tRNA ligase OS=Staphylococcus aureus OX=1280 GN=thrS PE=3 SV=1	2	531.269	-0.37012	0.013454	68.657	1
1422	IYGYDDIPSTLPVFEK	16	Unmodified	_IYGYDDIPSTLPVFEK_	A0A6B5T415	Phenylalanine--tRNA ligase subunit beta OS=Staphylococcus aureus OX=1280 GN=G0Z16_01135 PE=4 SV=1	2	928.969	-0.74527	0.00072966	81.346	1
1423	IYNYINDR	8	Unmodified	_IYNYINDR_	W8TV52	Ferritin OS=Staphylococcus aureus OX=1280 GN=ftnA PE=3 SV=1	2	535.767	0.31049	0.018409	76.679	1
1424	IYSSIAQK	8	Unmodified	_IYSSIAQK_	A0A6B5T8X8	P-loop NTPase OS=Staphylococcus aureus OX=1280 GN=G0Z16_09105 PE=4 SV=1	2	455.256		0.0046838	82.452	1
1425	IYVEDEYVR	9	Unmodified	_IYVEDEYVR_	A0A6A9H2G2	Branched-chain amino acid aminotransferase OS=Staphylococcus aureus OX=1280 GN=GAY51_12120 PE=4 SV=1	2	593.293	2.4987	0.018371	64.654	1
1426	IYYAEDYHNHEYATK	15	Unmodified	_IYYAEDYHNHEYATK_	A0A2X2K194	ComE operon protein 2 OS=Staphylococcus aureus OX=1280 GN=tadA_2 PE=4 SV=1	4	479.967	-0.97379	0.025662	22.349	1
1427	KADVFISTILIPGAKPPK	18	malon(K)	_KADVFISTILIPGAK(ma)PPK_	Q6GGW9	Alanine dehydrogenase 1 OS=Staphylococcus aureus (strain MRSA252) OX=282458 GN=ald1 PE=3 SV=1	3	661.05	0.92153	0.00036598	69.765	1
1428	KADVFISTILIPGAKPPK	18	malon(K)	_K(ma)ADVFISTILIPGAKPPK_	Q6GGW9	Alanine dehydrogenase 1 OS=Staphylococcus aureus (strain MRSA252) OX=282458 GN=ald1 PE=3 SV=1	3	661.05	0.83623	0.0014963	61.16	1
1429	KADVFISTILIPGAKPPK	18	Unmodified	_KADVFISTILIPGAKPPK_	Q6GGW9	Alanine dehydrogenase 1 OS=Staphylococcus aureus (strain MRSA252) OX=282458 GN=ald1 PE=3 SV=1	3	632.384	3.0843	0.0031571	57.936	1
1430	KAGVITGLPDAYGR	14	malon(K)	_K(ma)AGVITGLPDAYGR_	W8TSM8	Formate C-acetyltransferase OS=Staphylococcus aureus OX=1280 GN=pflB PE=4 SV=1	2	752.394	0.75873	0.00073717	90.422	1
1431	KAGVITGLPDAYGR	14	malon(K)	_K(ma)AGVITGLPDAYGR_	W8TSM8	Formate C-acetyltransferase OS=Staphylococcus aureus OX=1280 GN=pflB PE=4 SV=1	2	752.394	0.21987	0.005651	61.477	1
1432	KAILGGAK	8	malon(K)	_K(ma)AILGGAK_	A0A1Q8DHH3	Autolysin OS=Staphylococcus aureus OX=1280 GN=BSZ10_00230 PE=4 SV=1	2	422.25	0.9238	0.028967	57.55	1
1433	KALESIIDNADETTQER	17	malon(K)	_K(ma)ALESIIDNADETTQER_	T1YBK5	Hydroxymethylglutaryl-CoA synthase OS=Staphylococcus aureus subsp. aureus CN1 OX=1193576 GN=SAKOR_02536 PE=4 SV=1	3	673.655	1.3201	4.3514e-26	149.82	1
1434	KALESIIDNADETTQER	17	malon(K)	_K(ma)ALESIIDNADETTQER_	T1YBK5	Hydroxymethylglutaryl-CoA synthase OS=Staphylococcus aureus subsp. aureus CN1 OX=1193576 GN=SAKOR_02536 PE=4 SV=1	2	1009.98	0.74569	5.5494e-44	186.9	1
1435	KANQLIK	7	Deamidation (NQ)	_KAN(de)QLIK_	A0A0U1MLI7	Phosphoesterase family protein OS=Staphylococcus aureus OX=1280 GN=SAMEA2445518_00592 PE=4 SV=1	2	408.253	-1.049	0.03165	55.441	1
1436	KAPDVGDYK	9	Unmodified	_KAPDVGDYK_	A0A380EFL0	Scaffold protein sufB OS=Staphylococcus aureus OX=1280 GN=NCTC10702_01397 PE=4 SV=1	2	496.756	1.8538	0.012091	70.942	1
1437	KAQITNANYK	10	malon(K)	_K(ma)AQITNANYK_	Q2YX14	Probable quinol oxidase subunit 2 OS=Staphylococcus aureus (strain bovine RF122 / ET3-1) OX=273036 GN=qoxA PE=3 SV=1	2	618.815	-1.2485	0.0064499	69.03	1
1438	KAQNMINDAQNK	12	malon(K)	_K(ma)AQNMINDAQNK_	Q8NVA9	Lipid II:glycine glycyltransferase OS=Staphylococcus aureus (strain MW2) OX=196620 GN=femX PE=3 SV=1	2	730.844	-0.72357	0.011155	57.288	1
1439	KAQSEQDQAFLSK	13	Unmodified	_KAQSEQDQAFLSK_	W8TMY9	2-keto-4-pentenoate hydratase OS=Staphylococcus aureus OX=1280 GN=yisK PE=4 SV=1	3	493.919	0.35365	0.00082375	76.759	1
1440	KAVAGLSEEQLK	12	malon(K)	_K(ma)AVAGLSEEQLK_	A0A6B1RNF5	Triose-phosphate isomerase OS=Staphylococcus aureus OX=1280 GN=GAY51_03870 PE=4 SV=1	2	679.862	0.36508	0.0080732	62.055	1
1441	KAVEEIK	7	malon(K)	_K(ma)AVEEIK_	Q6GJD0	50S ribosomal protein L1 OS=Staphylococcus aureus (strain MRSA252) OX=282458 GN=rplA PE=3 SV=1	2	451.745	-2.2564	0.028211	74.376	1
1442	KAVSAEEYK	9	malon(K)	_K(ma)AVSAEEYK_	A0A6B5I265	ATP-dependent Clp protease ATP-binding subunit OS=Staphylococcus aureus OX=1280 GN=G0X69_04915 PE=4 SV=1	2	555.769	-0.63885	0.012524	66.267	1
1443	KCVIGLPGGCPLGPR	15	malon(K)	_K(ma)CVIGLPGGCPLGPR_	W8TUM1	UDP-N-acetylglucosamine 1-carboxyvinyltransferase OS=Staphylococcus aureus OX=1280 GN=murZ PE=3 SV=1	2	833.924	-1.5696	0.0063872	57.525	1
1444	KDANASVILNNLYK	14	malon(K)	_K(ma)DANASVILNNLYK_	A0A6B5I2R8	DNA gyrase subunit A OS=Staphylococcus aureus OX=1280 GN=gyrA PE=4 SV=1	2	824.931	0.024217	0.0024776	76.586	1
1445	KDEIWEGK	8	Unmodified	_KDEIWEGK_	Q99UH2	Aerobic glycerol-3-phosphate dehydrogenase OS=Staphylococcus aureus (strain Mu50 / ATCC 700699) OX=158878 GN=glpD PE=3 SV=2	2	502.756	-0.49736	0.016117	80.231	1
1446	KDENAVIVDATKTLNEEAPYEYVSK	25	malon(K)	_KDENAVIVDATK(ma)TLNEEAPYEYVSK_	A0A1L1JYE6	UDP-N-acetylglucosamine 1-carboxyvinyltransferase OS=Staphylococcus aureus OX=1280 GN=murA PE=3 SV=1	3	971.473	0.88263	0.00019024	48.286	1
1447	KDENAVVVDATK	12	Unmodified	_KDENAVVVDATK_	Q2YUK4	UDP-N-acetylglucosamine 1-carboxyvinyltransferase 1 OS=Staphylococcus aureus (strain bovine RF122 / ET3-1) OX=273036 GN=murA1 PE=3 SV=1	2	644.841	1.105	2.8586e-11	152	1
1448	KDEVIIK	7	Unmodified	_KDEVIIK_	A0A6B5B7N3	Glutamine--fructose-6-phosphate transaminase (Isomerizing) OS=Staphylococcus aureus OX=1280 GN=glmS PE=4 SV=1	2	422.761	-1.1427	0.023203	100.02	1
1449	KDGKDIQLTIDAK	13	Deamidation (NQ),malon(K)	_K(ma)DGKDIQ(de)LTIDAK_	D3K2V7	Penicillin binding protein 2A (Fragment) OS=Staphylococcus aureus OX=1280 GN=mecA PE=4 SV=1	2	766.396	0.35125	0.01396	59.116	1
1450	KDLTDDELGR	10	Unmodified	_KDLTDDELGR_	A0A380EL21	30S ribosomal protein S13 OS=Staphylococcus aureus OX=1280 GN=rpsM_1 PE=3 SV=1	3	387.863	0.13811	0.019202	40.496	1
1451	KDLVVVPR	8	malon(K)	_K(ma)DLVVVPR_	A6QJ75	30S ribosomal protein S5 OS=Staphylococcus aureus (strain Newman) OX=426430 GN=rpsE PE=3 SV=1	2	506.295	2.0809	0.032037	55.718	1
1452	KDQLLQSLNEGDVIDGK	17	Unmodified	_KDQLLQSLNEGDVIDGK_	Q6GGT5	30S ribosomal protein S1 OS=Staphylococcus aureus (strain MRSA252) OX=282458 GN=rpsA PE=3 SV=1	3	624.662	0.78205	6.866e-05	85.046	1
1453	KDQLLQSLNEGDVIDGK	17	Unmodified	_KDQLLQSLNEGDVIDGK_	Q6GGT5	30S ribosomal protein S1 OS=Staphylococcus aureus (strain MRSA252) OX=282458 GN=rpsA PE=3 SV=1	2	936.489	0.72843	9.7433e-191	307.55	1
1454	KDTYYGIMK	9	Oxidation (M)	_KDTYYGIM(ox)K_	A0A6B5HQ20	DUF4889 domain-containing protein OS=Staphylococcus aureus OX=1280 GN=G0X69_02130 PE=4 SV=1	2	567.779		0.013228	50.108	1
1455	KDYADINFTYVGDGR	15	Unmodified	_KDYADINFTYVGDGR_	Q8NX44	Ornithine carbamoyltransferase OS=Staphylococcus aureus (strain MW2) OX=196620 GN=argF PE=3 SV=1	3	578.609	0.077057	0.0020577	60.489	1
1456	KDYGLTFSPCNTK	13	Unmodified	_KDYGLTFSPCNTK_	Q99UH2	Aerobic glycerol-3-phosphate dehydrogenase OS=Staphylococcus aureus (strain Mu50 / ATCC 700699) OX=158878 GN=glpD PE=3 SV=2	3	510.913	-0.17383	0.029985	26.591	1
1457	KEDLIYPIFVVEK	13	Unmodified	_KEDLIYPIFVVEK_	A0A0U1N014	Delta-aminolevulinic acid dehydratase OS=Staphylococcus aureus OX=1280 GN=hemB PE=3 SV=1	3	531.636	0.84269	0.0011859	69.92	1
1458	KEDLIYPIFVVEKDDIK	17	malon(K)	_KEDLIYPIFVVEK(ma)DDIK_	A0A0U1N014	Delta-aminolevulinic acid dehydratase OS=Staphylococcus aureus OX=1280 GN=hemB PE=3 SV=1	3	717.38	0.4929	0.0073891	44.998	1
1459	KEEINPK	7	Unmodified	_KEEINPK_	T1YD05	Arginine deiminase OS=Staphylococcus aureus subsp. aureus CN1 OX=1193576 GN=arcA PE=3 SV=1	2	429.24	1.2295	0.0086973	117.39	1
1460	KEGNEGLLTVTVPAEK	16	Unmodified	_KEGNEGLLTVTVPAEK_	T1YA45	Trigger factor OS=Staphylococcus aureus subsp. aureus CN1 OX=1193576 GN=tig PE=3 SV=1	3	562.309	0.27155	1.1388e-05	98.281	1
1461	KEGNEGLLTVTVPAEK	16	Unmodified	_KEGNEGLLTVTVPAEK_	T1YA45	Trigger factor OS=Staphylococcus aureus subsp. aureus CN1 OX=1193576 GN=tig PE=3 SV=1	2	842.959	0.094328	1.3283e-12	131.45	1
1462	KEGNEGLLTVTVPAEKVNK	19	malon(K)	_KEGNEGLLTVTVPAEK(ma)VNK_	T1YA45	Trigger factor OS=Staphylococcus aureus subsp. aureus CN1 OX=1193576 GN=tig PE=3 SV=1	3	704.711	2.6403	0.0043305	46.46	1
1463	KEGQGCISLK	10	malon(K)	_K(ma)EGQGCISLK_	A0A380DTU2	Iron-sulfur cluster regulator IscR OS=Staphylococcus aureus OX=1280 GN=iscR_2 PE=4 SV=1	2	603.295	0.57276	0.00011948	128.54	1
1464	KEGQGCISLK	10	Unmodified	_KEGQGCISLK_	A0A380DTU2	Iron-sulfur cluster regulator IscR OS=Staphylococcus aureus OX=1280 GN=iscR_2 PE=4 SV=1	2	560.295	-3.3384	0.029483	54.772	1
1465	KENGVDLSQDK	11	Unmodified	_KENGVDLSQDK_	A0A6B5UN24	Molecular chaperone DnaK OS=Staphylococcus aureus OX=1280 GN=dnaK PE=4 SV=1	3	411.542	-1.0561	0.00089187	78.548	1
1466	KENTYEGVEAVIDKDFASEK	20	Unmodified	_KENTYEGVEAVIDKDFASEK_	A0A659FUB0	Carbamate kinase OS=Staphylococcus aureus OX=1280 GN=arcC PE=3 SV=1	3	758.038	-0.012064	8.278e-08	95.307	1
1467	KEQLEDGQRDESEDRKEEK	19	Deamidation (NQ)	_KEQ(de)LEDGQRDESEDRKEEK_	A0A6B5MGD4	ATP-dependent metallopeptidase FtsH/Yme1/Tma family protein OS=Staphylococcus aureus OX=1280 GN=G0Z30_13305 PE=4 SV=1	3	783.698	-2.0192	0.0020457	51.535	1
1468	KEVLLVKQYR	10	malon(K)	_KEVLLVK(ma)QYR_	A0A0U1MLN5	ADP-ribose pyrophosphatase OS=Staphylococcus aureus OX=1280 GN=nudF PE=4 SV=1	2	681.393	0.79188	0.010011	85.29	1
1469	KEYNEALVK	9	Unmodified	_KEYNEALVK_	A0A380DTW2	Histidyl-tRNA synthetase OS=Staphylococcus aureus OX=1280 GN=hisS_3 PE=4 SV=1	2	547.298	0.35415	0.0091665	76.228	1
1470	KFEWMEQLPLTSNGK	15	Deamidation (NQ)	_KFEWMEQLPLTSN(de)GK_	A0A6B1RKY1	D-alanine--poly(Phosphoribitol) ligase subunit DltA OS=Staphylococcus aureus OX=1280 GN=dltA PE=4 SV=1	3	603.634	-1.8352	0.0041649	68.481	1
1471	KFGAFVELPEGK	12	malon(K)	_K(ma)FGAFVELPEGK_	W8TRX1	Polyribonucleotide nucleotidyltransferase OS=Staphylococcus aureus OX=1280 GN=yabR PE=4 SV=1	2	704.361	-1.6041	0.0025356	73.296	1
1472	KFGAVYQYGDIK	12	malon(K)	_K(ma)FGAVYQYGDIK_	Q9KX07	Thioredoxin reductase (Fragment) OS=Staphylococcus aureus OX=1280 PE=3 SV=1	2	737.864	1.2402	0.0080732	62.055	1
1473	KFIDNELK	8	Unmodified	_KFIDNELK_	T1YAQ4	30S ribosomal protein S3 OS=Staphylococcus aureus subsp. aureus CN1 OX=1193576 GN=rpsC PE=3 SV=1	2	503.782	-0.010176	0.025391	70.056	1
1474	KFKEIAAEQGTK	12	malon(K)	_K(ma)FKEIAAEQGTK_	T1Y7U3	Dihydrolipoamide acetyltransferase component of pyruvate dehydrogenase complex OS=Staphylococcus aureus subsp. aureus CN1 OX=1193576 GN=SAKOR_01017 PE=3 SV=1	3	479.252	-0.056658	0.0014209	70.47	1
1475	KFKEIAAEQGTK	12	malon(K)	_KFK(ma)EIAAEQGTK_	T1Y7U3	Dihydrolipoamide acetyltransferase component of pyruvate dehydrogenase complex OS=Staphylococcus aureus subsp. aureus CN1 OX=1193576 GN=SAKOR_01017 PE=3 SV=1	2	718.375	0.11829	6.8842e-05	106.38	1
1476	KFNSEASK	8	malon(K)	_K(ma)FNSEASK_	Q6GFZ4	Thiol peroxidase OS=Staphylococcus aureus (strain MRSA252) OX=282458 GN=tpx PE=3 SV=1	2	498.735	1.0593	0.0083569	95.815	1
1477	KFNYSSVMEVPK	12	Oxidation (M)	_KFNYSSVM(ox)EVPK_	W8TUC3	50S ribosomal protein L5 OS=Staphylococcus aureus OX=1280 GN=rplE PE=1 SV=1	3	482.243	-1.5463	0.00026452	88.021	1
1478	KFNYSSVMEVPK	12	Unmodified	_KFNYSSVMEVPK_	W8TUC3	50S ribosomal protein L5 OS=Staphylococcus aureus OX=1280 GN=rplE PE=1 SV=1	2	714.863	1.1707	0.026449	51.726	1
1479	KFNYSSVMEVPK	12	Oxidation (M),malon(K)	_K(ma)FNYSSVM(ox)EVPK_	W8TUC3	50S ribosomal protein L5 OS=Staphylococcus aureus OX=1280 GN=rplE PE=1 SV=1	2	765.861	-1.2377	0.0039161	63.062	1
1480	KFQAILPLR	9	malon(K)	_K(ma)FQAILPLR_	A0A380DZB9	Topoisomerase IV subunit B OS=Staphylococcus aureus OX=1280 GN=parE_2 PE=4 SV=1	2	586.345	-0.10888	0.0092821	69.721	1
1481	KFTDLNSPQK	10	Unmodified	_KFTDLNSPQK_	A0A5C8X5B7	30S ribosomal protein S12 (Fragment) OS=Staphylococcus aureus OX=1280 GN=FVP29_13465 PE=4 SV=1	2	589.314	1.1587	2.8711e-08	152.69	1
1482	KFTDLNSPQK	10	malon(K)	_K(ma)FTDLNSPQK_	A0A5C8X5B7	30S ribosomal protein S12 (Fragment) OS=Staphylococcus aureus OX=1280 GN=FVP29_13465 PE=4 SV=1	2	632.314		0.0035178	59.796	1
1483	KFVPEGIEGR	10	malon(K)	_K(ma)FVPEGIEGR_	A0A5C8X421	Inosine-5'-monophosphate dehydrogenase (Fragment) OS=Staphylococcus aureus OX=1280 GN=guaB PE=3 SV=1	2	609.312	-1.8462	0.014138	60.157	1
1484	KFVPEGIEGR	10	Unmodified	_KFVPEGIEGR_	A0A5C8X421	Inosine-5'-monophosphate dehydrogenase (Fragment) OS=Staphylococcus aureus OX=1280 GN=guaB PE=3 SV=1	2	566.311	-1.0843	0.028003	55.314	1
1485	KGAILVNAAR	10	malon(K)	_K(ma)GAILVNAAR_	Q2FVA3	D-lactate dehydrogenase, putative OS=Staphylococcus aureus (strain NCTC 8325) OX=93061 GN=SAOUHSC_02830 PE=3 SV=1	2	549.817	0.034368	0.010703	64.121	1
1486	KGDIITEIDGK	11	Unmodified	_KGDIITEIDGK_	A0A6B0D341	PDZ domain-containing protein (Fragment) OS=Staphylococcus aureus OX=1280 GN=GO941_14425 PE=4 SV=1	3	396.887	-1.8618	0.0058059	56.087	1
1487	KGDIITEIDGK	11	Unmodified	_KGDIITEIDGK_	A0A6B0D341	PDZ domain-containing protein (Fragment) OS=Staphylococcus aureus OX=1280 GN=GO941_14425 PE=4 SV=1	2	594.827	-0.21096	0.015571	60.157	1
1488	KGDVVKAVIVR	11	malon(K)	_KGDVVK(ma)AVIVR_	T1YBA9	50S ribosomal protein L14 OS=Staphylococcus aureus subsp. aureus CN1 OX=1193576 GN=rplN PE=3 SV=1	3	423.922	0.98022	0.0063587	57.434	1
1489	KGDVVKAVIVR	11	malon(K)	_KGDVVK(ma)AVIVR_	T1YBA9	50S ribosomal protein L14 OS=Staphylococcus aureus subsp. aureus CN1 OX=1193576 GN=rplN PE=3 SV=1	3	423.922	0.67181	0.0063587	57.434	1
1490	KGDVVKAVIVR	11	malon(K)	_KGDVVK(ma)AVIVR_	T1YBA9	50S ribosomal protein L14 OS=Staphylococcus aureus subsp. aureus CN1 OX=1193576 GN=rplN PE=3 SV=1	2	635.38	-0.21657	0.0066458	84.759	1
1491	KGESTEDYTLVSLLTK	16	Unmodified	_KGESTEDYTLVSLLTK_	A0A6B5EK94	NAD(P)/FAD-dependent oxidoreductase OS=Staphylococcus aureus OX=1280 GN=G0Y82_06660 PE=4 SV=1	3	595.316	-1.2031	0.0011213	66.809	1
1492	KGFLLDGFPR	10	malon(K)	_K(ma)GFLLDGFPR_	W8TRE5	Adenylate kinase OS=Staphylococcus aureus OX=1280 GN=adk PE=3 SV=1	2	618.325	2.0637	0.0039162	77.185	1
1493	KGLADTALK	9	Unmodified	_KGLADTALK_	A0A6B5TUA1	DNA-directed RNA polymerase subunit beta OS=Staphylococcus aureus OX=1280 GN=rpoC PE=4 SV=1	2	458.777	0.37459	0.023555	41.399	1
1494	KGLVEIR	7	Unmodified	_KGLVEIR_	W8U3W0	50S ribosomal protein L3 OS=Staphylococcus aureus OX=1280 GN=rplC PE=1 SV=1	2	407.761	1.1619	0.028401	81.215	1
1495	KGPFVDEHLMK	11	Oxidation (M)	_KGPFVDEHLM(ox)K_	Q6GEI7	30S ribosomal protein S19 OS=Staphylococcus aureus (strain MRSA252) OX=282458 GN=rpsS PE=3 SV=1	3	439.56	1.0867	0.0011676	75.739	1
1496	KGPFVDEHLMK	11	Oxidation (M)	_KGPFVDEHLM(ox)K_	Q6GEI7	30S ribosomal protein S19 OS=Staphylococcus aureus (strain MRSA252) OX=282458 GN=rpsS PE=3 SV=1	3	439.56	-0.28635	0.0061956	56.139	1
1497	KGPFVDEHLMK	11	Unmodified	_KGPFVDEHLMK_	Q6GEI7	30S ribosomal protein S19 OS=Staphylococcus aureus (strain MRSA252) OX=282458 GN=rpsS PE=3 SV=1	2	650.84	-2.9035	0.0036161	77.185	1
1498	KGPFVDEHLMK	11	Unmodified	_KGPFVDEHLMK_	Q6GEI7	30S ribosomal protein S19 OS=Staphylococcus aureus (strain MRSA252) OX=282458 GN=rpsS PE=3 SV=1	3	434.229	-1.8683	0.0024983	66.267	1
1499	KGPQIVVGTPGR	12	malon(K)	_K(ma)GPQIVVGTPGR_	A0A6B5SE92	DEAD/DEAH box helicase OS=Staphylococcus aureus OX=1280 GN=G0Y75_11455 PE=4 SV=1	2	647.859	0.43519	0.00078825	86.214	1
1500	KGPVKTVANK	10	malon(K)	_KGPVK(ma)TVANK_	W8U8U6	30S ribosomal protein S13 OS=Staphylococcus aureus OX=1280 GN=rpsM PE=1 SV=1	2	564.325	0.66734	0.0007565	126.83	1
1501	KGSSNYPIEILK	12	Unmodified	_KGSSNYPIEILK_	Q2G1U3	Oligoendopeptidase F OS=Staphylococcus aureus (strain NCTC 8325) OX=93061 GN=SAOUHSC_00937 PE=3 SV=1	3	450.254	0.65871	0.027114	30.023	1
1502	KGTNLTYQDK	10	Unmodified	_KGTNLTYQDK_	A0A659FND5	Penicillin-binding protein OS=Staphylococcus aureus OX=1280 GN=E3K14_05825 PE=4 SV=1	2	584.304	0.23408	0.00038124	101.71	1
1503	KGVNLPGVR	9	malon(K)	_K(ma)GVNLPGVR_	W8UX29	Pyruvate kinase OS=Staphylococcus aureus OX=1280 GN=pyk PE=3 SV=1	2	513.291	-2.3375	0.0013281	117.52	1
1504	KHESELTELDR	11	Unmodified	_KHESELTELDR_	X5EIQ4	Dihydroxyacetone kinase OS=Staphylococcus aureus OX=1280 GN=dhaL PE=4 SV=1	3	452.897	0.048224	0.0058059	56.087	1
1505	KIEENGELAK	10	Unmodified	_KIEENGELAK_	A0A6B0BGX4	Transporter substrate-binding domain-containing protein (Fragment) OS=Staphylococcus aureus OX=1280 GN=GO793_18085 PE=4 SV=1	2	565.806	-0.67616	3.8106e-06	143.97	1
1506	KIESLLSR	8	malon(K)	_K(ma)IESLLSR_	A0A6B5I3U4	Transcriptional regulator (Fragment) OS=Staphylococcus aureus OX=1280 GN=G0V76_13030 PE=4 SV=1	2	516.29	0.23389	0.02467	62.633	1
1507	KIHASSHGCMEELK	14	malon(K)	_K(ma)IHASSHGCMEELK_	A0A380DYD9	Zn-dependent hydrolase OS=Staphylococcus aureus OX=1280 GN=NCTC5664_02203 PE=4 SV=1	3	571.596	0.26272	0.00055797	82.01	1
1508	KIVQHLEER	9	malon(K)	_K(ma)IVQHLEER_	A0A6B5UMM0	Uncharacterized protein OS=Staphylococcus aureus OX=1280 GN=G0X47_00400 PE=4 SV=1	2	619.33	-0.98671	0.0012987	117.09	1
1509	KLAHEINADLIMSGTSGLNAVER	23	Oxidation (M),malon(K)	_K(ma)LAHEINADLIM(ox)SGTSGLNAVER_	T1Y978	Universal stress protein OS=Staphylococcus aureus subsp. aureus CN1 OX=1193576 GN=SAKOR_01651 PE=3 SV=1	3	847.759	0.39672	0.0073936	54.003	1
1510	KLAHEINADLIMSGTSGLNAVER	23	malon(K)	_K(ma)LAHEINADLIMSGTSGLNAVER_	T1Y978	Universal stress protein OS=Staphylococcus aureus subsp. aureus CN1 OX=1193576 GN=SAKOR_01651 PE=3 SV=1	3	842.427	-0.26589	8.9042e-09	84.509	1
1511	KLAIVPILR	9	malon(K)	_K(ma)LAIVPILR_	W8U942	Uracil phosphoribosyltransferase OS=Staphylococcus aureus OX=1280 GN=upp PE=3 SV=1	2	554.858	-2.4178	0.0082818	72.2	1
1512	KLDKNMDFLDIDK	13	malon(K)	_KLDK(ma)NMDFLDIDK_	A0A380E2J6	Iron-sulfur cluster assembly ATPase SufC OS=Staphylococcus aureus OX=1280 GN=yurY PE=4 SV=1	3	560.943	1.1969	0.015144	42.708	1
1513	KLEEINDIFEEMENGTITGR	20	Unmodified	_KLEEINDIFEEMENGTITGR_	A0A6B1RIE9	Alcohol dehydrogenase AdhP OS=Staphylococcus aureus OX=1280 GN=adhP PE=4 SV=1	3	780.046	-0.68557	2.484e-53	190.96	1
1514	KLESAGVIESR	11	Unmodified	_KLESAGVIESR_	A0A6B0CMV4	GTP-sensing pleiotropic transcriptional regulator CodY (Fragment) OS=Staphylococcus aureus OX=1280 GN=codY PE=4 SV=1	3	396.891	0.4156	0.0024983	66.267	1
1515	KLESAGVIESR	11	Unmodified	_KLESAGVIESR_	A0A6B0CMV4	GTP-sensing pleiotropic transcriptional regulator CodY (Fragment) OS=Staphylococcus aureus OX=1280 GN=codY PE=4 SV=1	2	594.833		0.001074	63.091	1
1516	KLGVPGEQELGGR	13	malon(K)	_K(ma)LGVPGEQELGGR_	A0A380E1N6	Thioredoxin reductase OS=Staphylococcus aureus OX=1280 GN=trxB_4 PE=4 SV=1	2	713.37	1.1123	0.013843	53.565	1
1517	KLKPEDTIVTFDNGGIIGDGNK	22	malon(K)	_K(ma)LKPEDTIVTFDNGGIIGDGNK_	W8U570	3-deoxy-7-phosphoheptulonate synthase OS=Staphylococcus aureus OX=1280 GN=aroA_2 PE=4 SV=1	3	806.411	2.936	0.00013218	64.574	1
1518	KLLDYAEAGDNIGALLR	17	malon(K)	_K(ma)LLDYAEAGDNIGALLR_	W8TRT9	Elongation factor Tu OS=Staphylococcus aureus OX=1280 GN=tufA PE=3 SV=1	2	959.499	1.6156	0.00010765	89.663	1
1519	KLLDYAEAGDNIGALLR	17	malon(K)	_K(ma)LLDYAEAGDNIGALLR_	W8TRT9	Elongation factor Tu OS=Staphylococcus aureus OX=1280 GN=tufA PE=3 SV=1	3	640.002	-0.19966	9.1259e-05	81.574	1
1520	KLNDSQAPK	9	Unmodified	_KLNDSQAPK_	A1KE71	Immunoglobulin G binding protein A (Fragment) OS=Staphylococcus aureus OX=1280 GN=spa PE=4 SV=1	2	500.775	1.4093	0.0099338	74.841	1
1521	KLNESQAPK	9	Unmodified	_KLNESQAPK_	A1KE71	Immunoglobulin G binding protein A (Fragment) OS=Staphylococcus aureus OX=1280 GN=spa PE=4 SV=1	2	507.783	0.49541	0.012412	70.363	1
1522	KLNIPGEEQLINK	13	Unmodified	_KLNIPGEEQLINK_	A0A6B0D0C8	Alkyl hydroperoxide reductase subunit F (Fragment) OS=Staphylococcus aureus OX=1280 GN=ahpF PE=4 SV=1	3	499.287	2.978	0.0032087	58.04	1
1523	KLNNAQAPK	9	Deamidation (NQ)	_KLNN(de)AQAPK_	A0A3P8MS23	Immunoglobulin G-binding protein A (Fragment) OS=Staphylococcus aureus OX=1280 PE=4 SV=1	2	492.777	0.58211	0.0019039	88.37	1
1524	KLPFGIGQIGK	11	malon(K)	_K(ma)LPFGIGQIGK_	W8UAF4	Glycine--tRNA ligase OS=Staphylococcus aureus OX=1280 GN=glyS PE=3 SV=1	2	622.356	-1.2459	0.003433	72.848	1
1525	KLQLEDVSENK	11	Unmodified	_KLQLEDVSENK_	A0A380DPU0	DNA polymerase III beta subunit OS=Staphylococcus aureus OX=1280 GN=dnaN_1 PE=3 SV=1	3	434.902	0.1278	0.015897	42.031	1
1526	KLSEYGLQLR	10	malon(K)	_K(ma)LSEYGLQLR_	W8TVK2	30S ribosomal protein S4 OS=Staphylococcus aureus OX=1280 GN=rpsD PE=1 SV=1	2	646.846	1.0896	0.0038095	77.597	1
1527	KLSGEAIK	8	malon(K)	_K(ma)LSGEAIK_	W8UAF4	Glycine--tRNA ligase OS=Staphylococcus aureus OX=1280 GN=glyS PE=3 SV=1	2	466.258	-0.071199	0.017773	71.085	1
1528	KLSNENFVSK	10	malon(K)	_K(ma)LSNENFVSK_	A0A6B5MHG9	Valine--tRNA ligase OS=Staphylococcus aureus OX=1280 GN=G0X47_01375 PE=4 SV=1	2	626.314	-0.079349	0.014053	60.255	1
1529	KLTDAGHK	8	malon(K)	_K(ma)LTDAGHK_	Q6GGW9	Alanine dehydrogenase 1 OS=Staphylococcus aureus (strain MRSA252) OX=282458 GN=ald1 PE=3 SV=1	2	478.246	-1.5795	0.026433	60.547	1
1530	KLTFENYGLDPEK	13	Unmodified	_KLTFENYGLDPEK_	T1Y9N5	Transketolase OS=Staphylococcus aureus subsp. aureus CN1 OX=1193576 GN=SAKOR_01278 PE=3 SV=1	3	518.6	-2.985	0.012438	42.317	1
1531	KMFIEILAK	9	Oxidation (M),malon(K)	_K(ma)M(ox)FIEILAK_	Q9FDP4	Uncharacterized protein OS=Staphylococcus aureus OX=1280 GN=DQV53_00015 PE=4 SV=1	2	597.826	1.5721	0.0034192	76.679	1
1532	KMIPSYGESLIEDEK	15	Oxidation (M),malon(K)	_K(ma)M(ox)IPSYGESLIEDEK_	W8U7S8	Probable malate:quinone oxidoreductase OS=Staphylococcus aureus OX=1280 GN=mqo2 PE=3 SV=1	2	920.93	-2.5005	0.0030763	59.342	1
1533	KNDVSETVNTDNK	13	Unmodified	_KNDVSETVNTDNK_	A0A6B1RTI2	Uncharacterized protein OS=Staphylococcus aureus OX=1280 GN=GAY51_06375 PE=4 SV=1	3	488.571	-1.8579	2.8608e-05	101.32	1
1534	KNDVSETVNTDNK	13	Unmodified	_KNDVSETVNTDNK_	A0A6B1RTI2	Uncharacterized protein OS=Staphylococcus aureus OX=1280 GN=GAY51_06375 PE=4 SV=1	2	732.352	-2.5284	0.00044327	93.243	1
1535	KNEIETLPFDQNLAQLSK	18	Unmodified	_KNEIETLPFDQNLAQLSK_	A0A6B5U8R7	Septation ring formation regulator EzrA OS=Staphylococcus aureus OX=1280 GN=ezrA PE=4 SV=1	3	696.704	-2.0001	9.9219e-19	135.09	1
1536	KNEIIKEYR	9	malon(K)	_KNEIIK(ma)EYR_	W8U6H8	30S ribosomal protein S15 OS=Staphylococcus aureus OX=1280 GN=rpsO PE=1 SV=1	3	426.894	1.316	0.0033176	75.416	1
1537	KNEIIKEYR	9	malon(K)	_KNEIIK(ma)EYR_	W8U6H8	30S ribosomal protein S15 OS=Staphylococcus aureus OX=1280 GN=rpsO PE=1 SV=1	2	639.838		2.6339e-06	99.752	1
1538	KNESLEDALR	10	malon(K)	_K(ma)NESLEDALR_	Q6GGC5	30S ribosomal protein S21 OS=Staphylococcus aureus (strain MRSA252) OX=282458 GN=rpsU PE=3 SV=1	2	630.807	0.44372	0.0039162	77.185	1
1539	KNESLEDALR	10	Unmodified	_KNESLEDALR_	Q6GGC5	30S ribosomal protein S21 OS=Staphylococcus aureus (strain MRSA252) OX=282458 GN=rpsU PE=3 SV=1	3	392.207	1.4323	0.0060807	57.785	1
1540	KNNVEVTTSK	10	malon(K)	_K(ma)NNVEVTTSK_	Q2FVA3	D-lactate dehydrogenase, putative OS=Staphylococcus aureus (strain NCTC 8325) OX=93061 GN=SAOUHSC_02830 PE=3 SV=1	2	603.304	-1.0996	0.00010932	107.39	1
1541	KNPGEVCPAK	10	Unmodified	_KNPGEVCPAK_	W8U1R6	Alkyl hydroperoxide reductase C OS=Staphylococcus aureus OX=1280 GN=ahpC PE=3 SV=1	2	550.282	-0.25137	0.0004225	120.06	1
1542	KNPGEVCPAK	10	Unmodified	_KNPGEVCPAK_	W8U1R6	Alkyl hydroperoxide reductase C OS=Staphylococcus aureus OX=1280 GN=ahpC PE=3 SV=1	3	367.19	1.1938	0.00042072	91.087	1
1543	KNPGEVCPAK	10	malon(K)	_K(ma)NPGEVCPAK_	W8U1R6	Alkyl hydroperoxide reductase C OS=Staphylococcus aureus OX=1280 GN=ahpC PE=3 SV=1	2	593.282	-0.96719	3.8982e-08	148.13	1
1544	KNPGEVCPAKWEEGAK	16	malon(K)	_KNPGEVCPAK(ma)WEEGAK_	W8U1R6	Alkyl hydroperoxide reductase C OS=Staphylococcus aureus OX=1280 GN=ahpC PE=3 SV=1	2	943.441	0.64625	0.00016132	97.256	1
1545	KNPGEVCPAKWEEGAK	16	malon(K)	_KNPGEVCPAK(ma)WEEGAK_	W8U1R6	Alkyl hydroperoxide reductase C OS=Staphylococcus aureus OX=1280 GN=ahpC PE=3 SV=1	3	629.296	1.7817	0.00018299	83.856	1
1546	KNVDLNELLQR	11	malon(K)	_K(ma)NVDLNELLQR_	Q8NYH4	Iron-sulfur cluster repair protein ScdA OS=Staphylococcus aureus (strain MW2) OX=196620 GN=scdA PE=3 SV=1	2	714.378	1.0347	0.003333	73.386	1
1547	KNVNLIR	7	2 Deamidation (NQ),malon(K)	_K(ma)N(de)VN(de)LIR_	A0A389XRT2	Ser-Asp rich fibrinogen/bone sialoprotein-binding protein SdrE_1 OS=Staphylococcus aureus OX=1280 GN=sdrE_1 PE=4 SV=1	2	472.756	-1.9824	0.027781	52.482	1
1548	KNYAVEATPGNLK	13	malon(K)	_K(ma)NYAVEATPGNLK_	W8TQ45	50S ribosomal protein L9 OS=Staphylococcus aureus OX=1280 GN=rplI PE=3 SV=1	2	745.878	0.73061	9.3117e-07	107.5	1
1549	KPDEIRPLDSEVGILPR	17	Unmodified	_KPDEIRPLDSEVGILPR_	W8UB98	Polyribonucleotide nucleotidyltransferase OS=Staphylococcus aureus OX=1280 GN=pnpA PE=3 SV=1	3	645.362	-2.745	0.00087686	72.583	1
1550	KPDEIRPLDSEVGILPR	17	malon(K)	_K(ma)PDEIRPLDSEVGILPR_	W8UB98	Polyribonucleotide nucleotidyltransferase OS=Staphylococcus aureus OX=1280 GN=pnpA PE=3 SV=1	3	674.029	1.56	0.0043744	52.451	1
1551	KPDLPFGGYK	10	Unmodified	_KPDLPFGGYK_	A0A6B1RRX7	Aldehyde dehydrogenase family protein OS=Staphylococcus aureus OX=1280 GN=GAY51_12455 PE=4 SV=1	2	561.303	2.4578	0.00054304	97.734	1
1552	KPETINYR	8	malon(K)	_K(ma)PETINYR_	A0A6B5TUA1	DNA-directed RNA polymerase subunit beta OS=Staphylococcus aureus OX=1280 GN=rpoC PE=4 SV=1	2	553.777	-1.1671	0.028768	57.785	1
1553	KPETINYR	8	Unmodified	_KPETINYR_	A0A6B5TUA1	DNA-directed RNA polymerase subunit beta OS=Staphylococcus aureus OX=1280 GN=rpoC PE=4 SV=1	2	510.777	1.2682	0.011575	116.73	1
1554	KPITATEEDLDDNNR	15	Unmodified	_KPITATEEDLDDNNR_	A0A5C8X2H2	16S rRNA (Cytosine(1402)-N(4))-methyltransferase (Fragment) OS=Staphylococcus aureus OX=1280 GN=mraW PE=4 SV=1	3	577.611	-0.64645	0.0078563	44.598	1
1555	KPITYEAGATSDSK	14	Unmodified	_KPITYEAGATSDSK_	A0A6B5L9I5	Molybdate ABC transporter substrate-binding protein (Fragment) OS=Staphylococcus aureus OX=1280 GN=modA PE=4 SV=1	3	489.916	-1.0275	1.6394e-05	104.09	1
1556	KPITYEAGATSDSK	14	Unmodified	_KPITYEAGATSDSK_	A0A6B5L9I5	Molybdate ABC transporter substrate-binding protein (Fragment) OS=Staphylococcus aureus OX=1280 GN=modA PE=4 SV=1	2	734.37	-1.7172	6.8206e-24	166.92	1
1557	KPLASSTWQACVDPVGGEGINYVTK	25	Unmodified	_KPLASSTWQACVDPVGGEGINYVTK_	A0A6B0BK82	Acryloyl-CoA reductase (Fragment) OS=Staphylococcus aureus OX=1280 GN=GO793_04015 PE=4 SV=1	3	893.115	-0.30737	4.0615e-20	117.61	1
1558	KPNLPFGGYK	10	Deamidation (NQ)	_KPN(de)LPFGGYK_	A0A033ULV4	Aldedh domain-containing protein OS=Staphylococcus aureus C0673 OX=1413510 GN=V070_02086 PE=3 SV=1	2	561.303	1.2334	8.6047e-06	88.495	1
1559	KPPFPTDGYGYEYNQR	16	Unmodified	_KPPFPTDGYGYEYNQR_	A0A5C8X7Z5	Catalase (Fragment) OS=Staphylococcus aureus OX=1280 GN=FVP29_08195 PE=4 SV=1	3	644.636	2.2262	4.8377e-18	135.47	1
1560	KPPFPTDGYGYEYNQR	16	Unmodified	_KPPFPTDGYGYEYNQR_	A0A5C8X7Z5	Catalase (Fragment) OS=Staphylococcus aureus OX=1280 GN=FVP29_08195 PE=4 SV=1	2	966.45	1.0905	0.021004	48.216	1
1561	KPVVINDMIAIR	12	Unmodified	_KPVVINDMIAIR_	A0A5C8X1Y9	2-oxo acid dehydrogenase subunit E2 (Fragment) OS=Staphylococcus aureus OX=1280 GN=FVP29_19450 PE=4 SV=1	3	456.939	2.593	5.589e-05	95.094	1
1562	KQAEIYPTALK	11	malon(K)	_K(ma)QAEIYPTALK_	I6QWL1	Uncharacterized protein OS=Staphylococcus aureus OX=1280 PE=4 SV=1	2	674.361	1.4627	0.013395	57.434	1
1563	KQAFSQMR	8	malon(K)	_K(ma)QAFSQMR_	A0A033UB82	Uncharacterized protein OS=Staphylococcus aureus C0673 OX=1413510 GN=V070_02785 PE=4 SV=1	2	541.258		0.017002	44.318	1
1564	KQDEPYLNYNLK	12	Unmodified	_KQDEPYLNYNLK_	A0A6B5IUF8	Signal peptidase I (Fragment) OS=Staphylococcus aureus OX=1280 GN=lepB PE=4 SV=1	3	508.928	0.074523	0.0089675	48.568	1
1565	KQFDQVQNYINK	12	Unmodified	_KQFDQVQNYINK_	A0A6B1RRX7	Aldehyde dehydrogenase family protein OS=Staphylococcus aureus OX=1280 GN=GAY51_12455 PE=4 SV=1	3	508.932	0.19232	0.0020091	66.267	1
1566	KQIVPQITEALTK	13	malon(K)	_K(ma)QIVPQITEALTK_	W8TS62	Probable manganese-dependent inorganic pyrophosphatase OS=Staphylococcus aureus OX=1280 GN=ppaC PE=3 SV=1	2	777.941	0.72422	0.0079468	59.345	1
1567	KQIVPQITEALTK	13	malon(K)	_K(ma)QIVPQITEALTK_	W8TS62	Probable manganese-dependent inorganic pyrophosphatase OS=Staphylococcus aureus OX=1280 GN=ppaC PE=3 SV=1	2	777.941	1.8812	0.0101	56.295	1
1568	KQKPNAKIK	9	Deamidation (NQ),3 malon(K)	_K(ma)Q(de)K(ma)PNAK(ma)IK_	A0A6B0BGX4	Transporter substrate-binding domain-containing protein (Fragment) OS=Staphylococcus aureus OX=1280 GN=GO793_18085 PE=4 SV=1	2	657.333	2.3738	0.0077184	55.37	1
1569	KQNNITTEIK	10	Unmodified	_KQNNITTEIK_	A0A5F0HPL9	D-alanine--D-alanine ligase OS=Staphylococcus aureus OX=1280 GN=ddl PE=3 SV=1	2	594.833	0.504	0.0012749	92.247	1
1570	KQYEVGEQASPIEFVTGR	18	malon(K)	_K(ma)QYEVGEQASPIEFVTGR_	A0A5C8X3J2	GTP pyrophosphokinase family protein (Fragment) OS=Staphylococcus aureus OX=1280 GN=FVP29_17825 PE=4 SV=1	3	708.68	0.34168	0.0052749	42.863	1
1571	KQYEVGEQASPIEFVTGR	18	malon(K)	_K(ma)QYEVGEQASPIEFVTGR_	A0A5C8X3J2	GTP pyrophosphokinase family protein (Fragment) OS=Staphylococcus aureus OX=1280 GN=FVP29_17825 PE=4 SV=1	2	1062.52	0.24048	7.0357e-05	60.735	1
1572	KSDSPALNK	9	Unmodified	_KSDSPALNK_	A0A5C8X5B7	30S ribosomal protein S12 (Fragment) OS=Staphylococcus aureus OX=1280 GN=FVP29_13465 PE=4 SV=1	2	480.261	-0.66357	0.0013691	102.52	1
1573	KSGSTGFGTSVNTSSNATSK	20	malon(K)	_K(ma)SGSTGFGTSVNTSSNATSK_	T1Y861	Cell division protein FtsZ OS=Staphylococcus aureus subsp. aureus CN1 OX=1193576 GN=ftsZ PE=3 SV=1	2	1002.46	-1.0228	8.602e-53	189.52	1
1574	KSITTDELK	9	malon(K)	_K(ma)SITTDELK_	X5EIY6	Rhodanese-like domain protein OS=Staphylococcus aureus OX=1280 GN=BTN44_03295 PE=4 SV=1	2	560.79	-1.9578	0.0040203	83.214	1
1575	KSPGTLAENR	10	malon(K)	_K(ma)SPGTLAENR_	A0A2X2KJ73	TmRNA-binding protein SmpB OS=Staphylococcus aureus OX=1280 GN=smpB_1 PE=4 SV=1	2	579.791	0.10493	0.0055666	70.808	2
1576	KSPYTLYDEK	10	Unmodified	_KSPYTLYDEK_	Q8NXF2	Argininosuccinate synthase OS=Staphylococcus aureus (strain MW2) OX=196620 GN=argG PE=3 SV=1	2	622.314	1.514	0.0067236	73.435	1
1577	KSSAEVQQTQQASIPASQK	19	Unmodified	_KSSAEVQQTQQASIPASQK_	P21222	30 kDa neutral phosphatase (Fragment) OS=Staphylococcus aureus OX=1280 PE=1 SV=2	3	672.683	-0.10192	0.0013958	56.347	1
1578	KSSAEVQQTQQASIPASQK	19	Unmodified	_KSSAEVQQTQQASIPASQK_	P21222	30 kDa neutral phosphatase (Fragment) OS=Staphylococcus aureus OX=1280 PE=1 SV=2	3	672.683		1.0868e-15	89.529	1
1579	KSTDALLNNAVATAVETGR	19	malon(K)	_K(ma)STDALLNNAVATAVETGR_	W8UX29	Pyruvate kinase OS=Staphylococcus aureus OX=1280 GN=pyk PE=3 SV=1	3	673.011	-2.2228	0.00017757	68.771	1
1580	KSTDALLNNAVATAVETGR	19	malon(K)	_K(ma)STDALLNNAVATAVETGR_	W8UX29	Pyruvate kinase OS=Staphylococcus aureus OX=1280 GN=pyk PE=3 SV=1	2	1009.01	-1.482	4.8273e-37	168.55	1
1581	KTEILDQLPK	10	Unmodified	_KTEILDQLPK_	T1YAM7	Leukocidin S subunit LukS OS=Staphylococcus aureus subsp. aureus CN1 OX=1193576 GN=SAKOR_01987 PE=4 SV=1	3	395.568	-1.1377	0.012357	48.981	1
1582	KTGNTPDGR	9	malon(K)	_K(ma)TGNTPDGR_	W8TSM8	Formate C-acetyltransferase OS=Staphylococcus aureus OX=1280 GN=pflB PE=4 SV=1	2	516.241		1.8537e-23	140.63	1
1583	KTILGHEEEIK	11	malon(K)	_K(ma)TILGHEEEIK_	T1YD05	Arginine deiminase OS=Staphylococcus aureus subsp. aureus CN1 OX=1193576 GN=arcA PE=3 SV=1	2	691.862	0.54503	1.424e-07	135.86	1
1584	KTILGHEEEIK	11	malon(K)	_K(ma)TILGHEEEIK_	T1YD05	Arginine deiminase OS=Staphylococcus aureus subsp. aureus CN1 OX=1193576 GN=arcA PE=3 SV=1	3	461.577	0.012458	0.00050309	82.651	1
1585	KTLLFGPMKPVGLEDPK	17	Oxidation (M),malon(K)	_K(ma)TLLFGPM(ox)KPVGLEDPK_	A0A6B0BUT7	Methylenetetrahydrofolate--tRNA-(Uracil(54)-C(5))-methyltransferase (FADH(2)-oxidizing) TrmFO (Fragment) OS=Staphylococcus aureus OX=1280 GN=GO793_12680 PE=4 SV=1	3	658.02	2.4558	0.0078063	41.689	1
1586	KTNSSVVVEDNPAIR	15	malon(K)	_K(ma)TNSSVVVEDNPAIR_	W8UVN7	50S ribosomal protein L30 OS=Staphylococcus aureus OX=1280 GN=rpmD PE=1 SV=1	2	857.934	1.2871	5.1214e-05	100.97	1
1587	KTTKNLVKKTTK	12	Deamidation (NQ),3 malon(K)	_K(ma)TTKN(de)LVK(ma)K(ma)TTK_	A0A143SME3	Immunoglobulin G binding protein A (Fragment) OS=Staphylococcus aureus OX=1280 GN=spa PE=4 SV=1	2	824.936	-1.9216	0.014386	40.493	1
1588	KVADSSDFDGPVGIGHTR	18	malon(K)	_K(ma)VADSSDFDGPVGIGHTR_	A0A6B5B7N3	Glutamine--fructose-6-phosphate transaminase (Isomerizing) OS=Staphylococcus aureus OX=1280 GN=glmS PE=4 SV=1	3	648.641	-1.2469	1.9216e-06	98.002	1
1589	KVAGTLR	7	malon(K)	_K(ma)VAGTLR_	A0A6D2GXJ7	ATP synthase F0F1 subunit alpha OS=Staphylococcus aureus OX=1280 GN=atpA PE=4 SV=1	2	415.74	-0.20442	0.022594	79.451	1
1590	KVAIENLR	8	malon(K)	_K(ma)VAIENLR_	W8TVL7	ATP-dependent 6-phosphofructokinase OS=Staphylococcus aureus OX=1280 GN=pfkA PE=3 SV=1	2	514.79	1.1953	0.029139	57.347	1
1591	KVDEAYNFLK	10	malon(K)	_K(ma)VDEAYNFLK_	A0A2X2M020	30S ribosomal protein S2 OS=Staphylococcus aureus OX=1280 GN=rpsB PE=1 SV=1	2	656.825	2.3625	0.000184	112.44	1
1592	KVDEAYNFLK	10	malon(K)	_K(ma)VDEAYNFLK_	A0A2X2M020	30S ribosomal protein S2 OS=Staphylococcus aureus OX=1280 GN=rpsB PE=1 SV=1	2	656.825	1.6064	0.00067264	93.766	1
1593	KVDEAYNFLK	10	Unmodified	_KVDEAYNFLK_	A0A2X2M020	30S ribosomal protein S2 OS=Staphylococcus aureus OX=1280 GN=rpsB PE=1 SV=1	3	409.552	1.1158	0.0031084	66.92	1
1594	KVDEAYNFLK	10	Unmodified	_KVDEAYNFLK_	A0A2X2M020	30S ribosomal protein S2 OS=Staphylococcus aureus OX=1280 GN=rpsB PE=1 SV=1	2	613.824	0.29741	0.00023699	126.19	1
1595	KVDELYQAAK	10	Unmodified	_KVDELYQAAK_	W8UU58	Superoxide dismutase OS=Staphylococcus aureus OX=1280 GN=sodA PE=3 SV=1	2	582.817	-0.83602	0.00020074	110.08	1
1596	KVDLDAR	7	Unmodified	_KVDLDAR_	T1YAQ4	30S ribosomal protein S3 OS=Staphylococcus aureus subsp. aureus CN1 OX=1193576 GN=rpsC PE=3 SV=1	2	408.732	-1.77	3.1967e-26	188.98	1
1597	KVDLQQNDAPETQK	14	malon(K)	_K(ma)VDLQQNDAPETQK_	R4R123	DNA-directed RNA polymerase subunit beta (Fragment) OS=Staphylococcus aureus OX=1280 GN=rpoB PE=3 SV=1	2	850.41	-0.51063	0.00011296	98.573	1
1598	KVDLQQNDAPETQK	14	Unmodified	_KVDLQQNDAPETQK_	R4R123	DNA-directed RNA polymerase subunit beta (Fragment) OS=Staphylococcus aureus OX=1280 GN=rpoB PE=3 SV=1	3	538.609	0.31416	0.0024146	58.723	1
1599	KVDLQQNDAPETQK	14	Unmodified	_KVDLQQNDAPETQK_	R4R123	DNA-directed RNA polymerase subunit beta (Fragment) OS=Staphylococcus aureus OX=1280 GN=rpoB PE=3 SV=1	2	807.41	0.2441	3.0936e-210	311	1
1600	KVEPDFVEVLPGVASK	16	Unmodified	_KVEPDFVEVLPGVASK_	A0A6B5QD35	Glycerol-3-phosphate responsive antiterminator GlpP (Fragment) OS=Staphylococcus aureus OX=1280 GN=G0Y42_14250 PE=4 SV=1	3	571.986	2.004	0.0052797	49.395	1
1601	KVFPELAAK	9	malon(K)	_K(ma)VFPELAAK_	A0A2Y9TRY4	Aspartyl/glutamyl-tRNA(Asn/Gln) amidotransferase subunit B OS=Staphylococcus aureus OX=1280 GN=gatB PE=3 SV=1	2	544.803		1.0308e-06	94.538	1
1602	KVHINVIEIK	10	Unmodified	_KVHINVIEIK_	T1YAQ4	30S ribosomal protein S3 OS=Staphylococcus aureus subsp. aureus CN1 OX=1193576 GN=rpsC PE=3 SV=1	3	398.252	-2.905	0.0007806	85.355	1
1603	KVHINVIEIK	10	malon(K)	_K(ma)VHINVIEIK_	T1YAQ4	30S ribosomal protein S3 OS=Staphylococcus aureus subsp. aureus CN1 OX=1193576 GN=rpsC PE=3 SV=1	3	426.919	1.6687	0.0032924	64.121	1
1604	KVHINVIEIK	10	malon(K)	_K(ma)VHINVIEIK_	T1YAQ4	30S ribosomal protein S3 OS=Staphylococcus aureus subsp. aureus CN1 OX=1193576 GN=rpsC PE=3 SV=1	2	639.874	1.084	0.00013565	109.44	1
1605	KVIAPLIK	8	malon(K)	_K(ma)VIAPLIK_	A0A2X2K1B6	Uncharacterized protein conserved in bacteria OS=Staphylococcus aureus OX=1280 GN=NCTC7878_01399 PE=4 SV=1	2	484.313	1.6348	0.023999	63.426	1
1606	KVKPEVDMTIK	11	malon(K)	_K(ma)VKPEVDMTIK_	A0A6B1RQ03	HTH-type transcriptional regulator SarS OS=Staphylococcus aureus OX=1280 GN=sarS PE=4 SV=1	3	458.583	0.44188	0.0090126	54.09	1
1607	KVLISAPATGDLK	13	malon(K)	_K(ma)VLISAPATGDLK_	T1Y6M8	Glyceraldehyde-3-phosphate dehydrogenase OS=Staphylococcus aureus subsp. aureus CN1 OX=1193576 GN=SAKOR_00776 PE=3 SV=1	2	699.896	1.1391	0.0093962	46.249	1
1608	KVNSLEIVTLLDKPNR	16	malon(K)	_K(ma)VNSLEIVTLLDKPNR_	A0A0H3K756	Hypoxanthine phosphoribosyltransferase OS=Staphylococcus aureus (strain Newman) OX=426430 GN=hpt PE=3 SV=1	3	642.362	-1.9042	0.00020076	82.651	1
1609	KVPGTQQELDK	11	Unmodified	_KVPGTQQELDK_	A0A2X2M9S7	APC family amino acid-polyamine-organocation transporter, antiporter OS=Staphylococcus aureus OX=1280 GN=NCTC7878_01978 PE=4 SV=1	2	621.838	1.0065	0.00025616	95.094	1
1610	KVPGTQQELDK	11	Unmodified	_KVPGTQQELDK_	A0A2X2M9S7	APC family amino acid-polyamine-organocation transporter, antiporter OS=Staphylococcus aureus OX=1280 GN=NCTC7878_01978 PE=4 SV=1	3	414.894	0.87779	0.0077116	53.211	1
1611	KVTELVK	7	Unmodified	_KVTELVK_	W0G6J3	Alkaline shock protein 23 (Fragment) OS=Staphylococcus aureus OX=1280 GN=asp23 PE=4 SV=1	2	408.763	-0.90237	0.026704	82.452	1
1612	KVTELVKEQVK	11	malon(K)	_KVTELVK(ma)EQVK_	W0G6J3	Alkaline shock protein 23 (Fragment) OS=Staphylococcus aureus OX=1280 GN=asp23 PE=4 SV=1	2	693.896	-0.79047	7.3065e-06	116.58	1
1613	KVTLANGK	8	Deamidation (NQ),malon(K)	_K(ma)VTLAN(de)GK_	A0A1Q8DHR5	Nitrate reductase subunit alpha OS=Staphylococcus aureus OX=1280 GN=BSZ10_00685 PE=3 SV=1	2	459.251		0.014958	47.657	1
1614	KVVAIEIPTSR	11	Unmodified	_KVVAIEIPTSR_	T1YD05	Arginine deiminase OS=Staphylococcus aureus subsp. aureus CN1 OX=1193576 GN=arcA PE=3 SV=1	3	404.915	-1.9739	0.029618	27.681	1
1615	KVVAIEIPTSR	11	malon(K)	_K(ma)VVAIEIPTSR_	T1YD05	Arginine deiminase OS=Staphylococcus aureus subsp. aureus CN1 OX=1193576 GN=arcA PE=3 SV=1	2	649.869	-0.49299	0.0011298	86.944	1
1616	KVVEYAHEK	9	malon(K)	_K(ma)VVEYAHEK_	A0A6B0BAU5	Ketose-bisphosphate aldolase (Fragment) OS=Staphylococcus aureus OX=1280 GN=GO793_02780 PE=4 SV=1	3	396.868	-1.1721	0.01099	50.116	1
1617	KVVEYAHEK	9	Unmodified	_KVVEYAHEK_	A0A6B0BAU5	Ketose-bisphosphate aldolase (Fragment) OS=Staphylococcus aureus OX=1280 GN=GO793_02780 PE=4 SV=1	3	368.201	-3.669	0.0041962	67.704	1
1618	KYALAYTPEK	10	malon(K)	_K(ma)YALAYTPEK_	A0A5C8X8E1	CoA-disulfide reductase (Fragment) OS=Staphylococcus aureus OX=1280 GN=FVP29_07925 PE=4 SV=1	2	635.322	-0.15342	0.00034889	99.283	1
1619	KYEAQTIPAVEQK	13	Unmodified	_KYEAQTIPAVEQK_	A0A6B0BWN7	NAD(P)H-dependent oxidoreductase OS=Staphylococcus aureus OX=1280 GN=GO793_15800 PE=4 SV=1	3	502.272	-1.9654	0.024201	32.295	1
1620	KYNEYQTNFK	10	Unmodified	_KYNEYQTNFK_	A0A6B5IKA9	Fibrinogen-binding protein (Fragment) OS=Staphylococcus aureus OX=1280 GN=G0Y40_13055 PE=4 SV=1	2	667.822	-0.0022819	0.0056941	76.326	1
1621	KYNHIELNNEVTK	13	Unmodified	_KYNHIELNNEVTK_	A0A6B1RLY3	Class 1b ribonucleoside-diphosphate reductase subunit alpha OS=Staphylococcus aureus OX=1280 GN=nrdE PE=4 SV=1	3	534.614	0.30972	1.8119e-08	118.76	1
1622	KYPALNTSFNEEAGEIVHK	19	Unmodified	_KYPALNTSFNEEAGEIVHK_	T1Y7U3	Dihydrolipoamide acetyltransferase component of pyruvate dehydrogenase complex OS=Staphylococcus aureus subsp. aureus CN1 OX=1193576 GN=SAKOR_01017 PE=3 SV=1	3	716.364	0.049915	0.0031655	47.726	1
1623	KYPALNTSFNEEAGEIVHK	19	malon(K)	_K(ma)YPALNTSFNEEAGEIVHK_	T1Y7U3	Dihydrolipoamide acetyltransferase component of pyruvate dehydrogenase complex OS=Staphylococcus aureus subsp. aureus CN1 OX=1193576 GN=SAKOR_01017 PE=3 SV=1	3	745.031	0.30272	6.4562e-07	91.589	1
1624	LAAESIENPQVR	12	Unmodified	_LAAESIENPQVR_	T1YD05	Arginine deiminase OS=Staphylococcus aureus subsp. aureus CN1 OX=1193576 GN=arcA PE=3 SV=1	2	663.854	1.1185	5.4456e-09	142.1	1
1625	LAAESIENPQVR	12	Unmodified	_LAAESIENPQVR_	T1YD05	Arginine deiminase OS=Staphylococcus aureus subsp. aureus CN1 OX=1193576 GN=arcA PE=3 SV=1	2	663.854	1.1197	0.030371	49.025	1
1626	LAAESIENPQVR	12	Unmodified	_LAAESIENPQVR_	T1YD05	Arginine deiminase OS=Staphylococcus aureus subsp. aureus CN1 OX=1193576 GN=arcA PE=3 SV=1	2	663.854	2.1025	2.731e-11	151.98	1
1627	LAEATAQDLLK	11	Unmodified	_LAEATAQDLLK_	A0A6B5T592	NAD-dependent malic enzyme OS=Staphylococcus aureus OX=1280 GN=G0Z16_05940 PE=4 SV=1	2	586.83	1.4338	0.00049158	93.345	1
1628	LAERPQNLSLALKEFVK	17	malon(K)	_LAERPQNLSLALK(ma)EFVK_	A0A5S9EUA0	Proline dehydrogenase OS=Staphylococcus aureus OX=1280 GN=TMSFP482_16730 PE=4 SV=1	3	681.381	-2.0979	2.5129e-08	110.12	1
1629	LAERPQNLSLAVK	13	Unmodified	_LAERPQNLSLAVK_	A0A6A9GTL8	Proline dehydrogenase OS=Staphylococcus aureus OX=1280 GN=GAY51_06235 PE=4 SV=1	3	480.284	-0.78407	0.0093588	45.28	1
1630	LAGEGTVVTVLNAISEQDAQASIK	24	Unmodified	_LAGEGTVVTVLNAISEQDAQASIK_	W8U595	Putative transcription factor OS=Staphylococcus aureus OX=1280 GN=uspA_1 PE=4 SV=1	3	805.431	0.9067	1.0237e-18	123.84	1
1631	LAHEINADLIMSGTSGLNAVER	22	Unmodified	_LAHEINADLIMSGTSGLNAVER_	T1Y978	Universal stress protein OS=Staphylococcus aureus subsp. aureus CN1 OX=1193576 GN=SAKOR_01651 PE=3 SV=1	3	771.062	-0.13718	0.00096547	48.706	1
1632	LAHEINADLIMSGTSGLNAVER	22	Unmodified	_LAHEINADLIMSGTSGLNAVER_	T1Y978	Universal stress protein OS=Staphylococcus aureus subsp. aureus CN1 OX=1193576 GN=SAKOR_01651 PE=3 SV=1	3	771.062	-0.42615	1.6942e-08	83.395	1
1633	LALEHKPK	8	Unmodified	_LALEHKPK_	A0A380DUE7	Serine hydroxymethyltransferase OS=Staphylococcus aureus OX=1280 GN=glyA PE=3 SV=1	2	468.287		0.026357	43.083	1
1634	LANEILDAANNTGGAVK	17	Deamidation (NQ)	_LANEILDAAN(de)NTGGAVK_	T1Y6H5	30S ribosomal protein S7 OS=Staphylococcus aureus subsp. aureus CN1 OX=1193576 GN=rpsG PE=3 SV=1	2	836.431	-3.2711	2.4347e-11	87.088	1
1635	LANEILDAANNTGGAVK	17	Deamidation (NQ)	_LANEILDAAN(de)NTGGAVK_	T1Y6H5	30S ribosomal protein S7 OS=Staphylococcus aureus subsp. aureus CN1 OX=1193576 GN=rpsG PE=3 SV=1	2	836.431	0.61588	0.011166	78.501	1
1636	LANEILDAANNTGGAVKK	18	malon(K)	_LANEILDAANNTGGAVK(ma)K_	T1Y6H5	30S ribosomal protein S7 OS=Staphylococcus aureus subsp. aureus CN1 OX=1193576 GN=rpsG PE=3 SV=1	3	628.994	2.297	0.0011402	59.163	1
1637	LANKPNFDR	9	Unmodified	_LANKPNFDR_	A0A2X2K209	2,3-bisphosphoglycerate-independent phosphoglycerate mutase OS=Staphylococcus aureus OX=1280 GN=pgm_2 PE=3 SV=1	3	358.861	1.4671	0.021648	39.622	1
1638	LAQDPALK	8	Unmodified	_LAQDPALK_	A0A142G9F0	N-acetylmuramoyl-L-alanine amidase OS=Staphylococcus aureus OX=1280 GN=atl PE=4 SV=1	2	428.25	1.3544	0.012583	87.476	1
1639	LAQTFTSNYGK	11	Unmodified	_LAQTFTSNYGK_	A0A6B0BGX4	Transporter substrate-binding domain-containing protein (Fragment) OS=Staphylococcus aureus OX=1280 GN=GO793_18085 PE=4 SV=1	2	615.312	1.1885	0.00016095	99.343	1
1640	LASESVVENMFTPVHDDNLK	20	Unmodified	_LASESVVENMFTPVHDDNLK_	A0A6B0BXN0	RNA-binding virulence regulatory protein CvfB (Fragment) OS=Staphylococcus aureus OX=1280 GN=cvfB PE=4 SV=1	3	749.032	1.5084	0.0018638	49.708	1
1642	LAVNEMLNAIQNK	13	Oxidation (M)	_LAVNEM(ox)LNAIQNK_	A0A5C8XAK5	Protein deglycase HchA (Fragment) OS=Staphylococcus aureus OX=1280 GN=hchA PE=4 SV=1	2	737.39	-0.55607	0.00034309	90.793	1
1643	LAVNEMLNAIQNK	13	Unmodified	_LAVNEMLNAIQNK_	A0A5C8XAK5	Protein deglycase HchA (Fragment) OS=Staphylococcus aureus OX=1280 GN=hchA PE=4 SV=1	2	729.393	-0.39383	0.01338	56.205	1
1644	LAVNEMLNAIQNK	13	Unmodified	_LAVNEMLNAIQNK_	A0A5C8XAK5	Protein deglycase HchA (Fragment) OS=Staphylococcus aureus OX=1280 GN=hchA PE=4 SV=1	3	486.598	1.0825	0.00094635	72.29	1
1645	LAYEINDFK	9	Unmodified	_LAYEINDFK_	A0A5C8X2V3	30S ribosomal protein S6 (Fragment) OS=Staphylococcus aureus OX=1280 GN=FVP29_18255 PE=3 SV=1	2	556.785	0.17744	0.00060775	129.63	1
1646	LCEDVAVYNHQIEK	14	Unmodified	_LCEDVAVYNHQIEK_	A0A3A3AQW1	Pyruvate oxidase OS=Staphylococcus aureus OX=1280 GN=cidC PE=3 SV=1	3	573.279	-1.9847	0.0049459	51.009	1
1647	LCRPETPAIIVTR	13	Unmodified	_LCRPETPAIIVTR_	A0A2X2K1Y7	HPr kinase/phosphorylase OS=Staphylococcus aureus OX=1280 GN=hprK_2 PE=4 SV=1	3	509.289	-1.2969	0.0069043	50.102	1
1648	LDAVVYSLGLAR	12	Unmodified	_LDAVVYSLGLAR_	W8TVK2	30S ribosomal protein S4 OS=Staphylococcus aureus OX=1280 GN=rpsD PE=1 SV=1	2	638.867	1.9957	0.013913	58.098	1
1649	LDDQATAYEHGDIVIEHADGEK	22	Unmodified	_LDDQATAYEHGDIVIEHADGEK_	Q6GHP2	Isoleucine--tRNA ligase OS=Staphylococcus aureus (strain MRSA252) OX=282458 GN=ileS PE=3 SV=1	4	607.283	0.51477	1.1463e-14	115.54	1
1650	LDDQATAYEHGDIVIEHADGEK	22	Unmodified	_LDDQATAYEHGDIVIEHADGEK_	Q6GHP2	Isoleucine--tRNA ligase OS=Staphylococcus aureus (strain MRSA252) OX=282458 GN=ileS PE=3 SV=1	3	809.375	-0.30383	0.00031554	55.128	1
1651	LDGYAMQCGHHLNINVFNR	19	Unmodified	_LDGYAMQCGHHLNINVFNR_	A0A6D1RXS6	Formate acetyltransferase OS=Staphylococcus aureus OX=1280 GN=pflB PE=4 SV=1	4	565.519	1.4306	0.0074005	37.851	1
1652	LDKEVEGTIR	10	malon(K)	_LDK(ma)EVEGTIR_	W8TQ45	50S ribosomal protein L9 OS=Staphylococcus aureus OX=1280 GN=rplI PE=3 SV=1	2	623.32		0.026473	53.869	1
1653	LDLAKAIKKEK	11	2 malon(K)	_LDLAKAIK(ma)K(ma)EK_	A0A033V0K8	Uncharacterized protein OS=Staphylococcus aureus C0673 OX=1413510 GN=V070_00520 PE=4 SV=1	2	714.901	1.9343	0.02401	55.314	1
1654	LDMSEYSDTTAVSK	14	Oxidation (M)	_LDM(ox)SEYSDTTAVSK_	A0A6B5I265	ATP-dependent Clp protease ATP-binding subunit OS=Staphylococcus aureus OX=1280 GN=G0X69_04915 PE=4 SV=1	2	781.848	-0.45578	1.5083e-07	111.83	1
1655	LDMSEYSDTTAVSK	14	Unmodified	_LDMSEYSDTTAVSK_	A0A6B5I265	ATP-dependent Clp protease ATP-binding subunit OS=Staphylococcus aureus OX=1280 GN=G0X69_04915 PE=4 SV=1	2	773.851	-0.80646	0.003833	72.898	1
1656	LDPAAASSITCAGVTTYK	18	Unmodified	_LDPAAASSITCAGVTTYK_	A0A6B1RIE9	Alcohol dehydrogenase AdhP OS=Staphylococcus aureus OX=1280 GN=adhP PE=4 SV=1	2	913.454	0.67424	4.9836e-37	174.68	1
1657	LDPAAASSITCAGVTTYK	18	Unmodified	_LDPAAASSITCAGVTTYK_	A0A6B1RIE9	Alcohol dehydrogenase AdhP OS=Staphylococcus aureus OX=1280 GN=adhP PE=4 SV=1	3	609.305	1.8666	0.0014276	57.171	1
1658	LDPAAASSITCAGVTTYK	18	Unmodified	_LDPAAASSITCAGVTTYK_	A0A6B1RIE9	Alcohol dehydrogenase AdhP OS=Staphylococcus aureus OX=1280 GN=adhP PE=4 SV=1	2	913.454	0.76108	0.012958	48.907	1
1659	LDPGEQKR	8	Deamidation (NQ)	_LDPGEQ(de)KR_	A0A0U2YGE1	Recombinase OS=Staphylococcus aureus OX=1280 GN=AUC57_00015 PE=4 SV=1	2	472.246		0.021644	45.081	1
1660	LDQKVKSVKSK	11	3 malon(K)	_LDQK(ma)VK(ma)SVK(ma)SK_	A0A033UHV7	Fe/B12 periplasmic-binding domain-containing protein OS=Staphylococcus aureus C0673 OX=1413510 GN=V070_02348 PE=4 SV=1	2	759.388	-0.018375	0.022756	63.185	1
1661	LDQPQNISIDK	11	Unmodified	_LDQPQNISIDK_	A0A142G9F0	N-acetylmuramoyl-L-alanine amidase OS=Staphylococcus aureus OX=1280 GN=atl PE=4 SV=1	2	635.836	1.5614	0.0012636	88.338	1
1662	LDRPAIESSNER	12	Unmodified	_LDRPAIESSNER_	W8U7S8	Probable malate:quinone oxidoreductase OS=Staphylococcus aureus OX=1280 GN=mqo2 PE=3 SV=1	2	693.852	-0.8026	1.9509e-06	111.12	1
1663	LDSLGQQLEEGLLK	14	Unmodified	_LDSLGQQLEEGLLK_	X5E188	Glutamate-1-semialdehyde 2,1-aminomutase OS=Staphylococcus aureus OX=1280 GN=gsaB PE=3 SV=1	2	771.922	2	0.0025421	80.96	1
1664	LDSSITIADHVVSPTLIHK	19	Unmodified	_LDSSITIADHVVSPTLIHK_	A0A380DXY3	Pyrimidine-nucleoside phosphorylase OS=Staphylococcus aureus OX=1280 GN=pdp PE=3 SV=1	4	512.286	0.093269	1.547e-06	85.937	1
1665	LDSSITIADHVVSPTLIHK	19	Unmodified	_LDSSITIADHVVSPTLIHK_	A0A380DXY3	Pyrimidine-nucleoside phosphorylase OS=Staphylococcus aureus OX=1280 GN=pdp PE=3 SV=1	3	682.713	-0.052948	8.7038e-07	90.718	1
1666	LDVDENPSTAAK	12	Unmodified	_LDVDENPSTAAK_	A0A2X2JXN0	Thioredoxin OS=Staphylococcus aureus OX=1280 GN=trxA_1 PE=4 SV=1	2	630.309	-1.5962	5.2069e-05	104.24	1
1667	LDVNEGDTFTFDK	13	Unmodified	_LDVNEGDTFTFDK_	Q99TK6	50S ribosomal protein L21 OS=Staphylococcus aureus (strain Mu50 / ATCC 700699) OX=158878 GN=rplU PE=3 SV=1	2	750.846	-1.5858	4.0565e-05	105.03	1
1668	LEAIVIQAQGYLK	13	2 Deamidation (NQ)	_LEAIVIQ(de)AQ(de)GYLK_	A0A5F0HIU2	DNA-3-methyladenine glycosylase I OS=Staphylococcus aureus OX=1280 GN=E3A28_00175 PE=4 SV=1	2	724.406	0.42946	0.021194	47.712	1
1669	LEDLGLGLR	9	Unmodified	_LEDLGLGLR_	W8TRE8	DNA-directed RNA polymerase subunit alpha OS=Staphylococcus aureus OX=1280 GN=rpoA PE=3 SV=1	2	493.287	1.719	0.0194	63.816	1
1670	LEDLGLGLR	9	Unmodified	_LEDLGLGLR_	W8TRE8	DNA-directed RNA polymerase subunit alpha OS=Staphylococcus aureus OX=1280 GN=rpoA PE=3 SV=1	2	493.287	0.46823	0.005057	83.948	1
1671	LEEAGLTVSSLCK	13	Unmodified	_LEEAGLTVSSLCK_	A0A6B1RND6	Xanthine phosphoribosyltransferase OS=Staphylococcus aureus OX=1280 GN=xpt PE=4 SV=1	2	703.863	-1.1298	0.0056644	67.234	1
1672	LEELGYGDLISHFDK	15	Unmodified	_LEELGYGDLISHFDK_	X5EIR3	Peptide methionine sulfoxide reductase MsrB OS=Staphylococcus aureus OX=1280 GN=msrB PE=3 SV=1	3	579.289	-0.40715	0.0086821	42.947	1
1673	LEFEQGFNHLATLK	14	Unmodified	_LEFEQGFNHLATLK_	T1Y861	Cell division protein FtsZ OS=Staphylococcus aureus subsp. aureus CN1 OX=1193576 GN=ftsZ PE=3 SV=1	3	549.623	2.1659	1.121e-07	108.97	1
1674	LEFGSPK	7	Unmodified	_LEFGSPK_	T1Y978	Universal stress protein OS=Staphylococcus aureus subsp. aureus CN1 OX=1193576 GN=SAKOR_01651 PE=3 SV=1	2	389.211	-0.56898	0.029542	79.469	1
1675	LEGTNVELGK	10	Unmodified	_LEGTNVELGK_	A0A6B5K1Z1	ADP-forming succinate--CoA ligase subunit beta OS=Staphylococcus aureus OX=1280 GN=sucC PE=4 SV=1	2	530.288	0.3989	0.00019749	110.39	1
1676	LEIVTTPNQDNPLTEGK	17	Unmodified	_LEIVTTPNQDNPLTEGK_	W8UU58	Superoxide dismutase OS=Staphylococcus aureus OX=1280 GN=sodA PE=3 SV=1	2	934.984	1.1286	4.9277e-08	113.01	1
1677	LELLSSDGMLVKR	13	malon(K)	_LELLSSDGMLVK(ma)R_	W8U5G0	Arsenate reductase OS=Staphylococcus aureus OX=1280 GN=spxA_2 PE=3 SV=1	2	773.911	-1.5472	0.0098006	56.514	1
1678	LELPASNIKK	10	malon(K)	_LELPASNIK(ma)K_	W8U8T8	30S ribosomal protein S8 OS=Staphylococcus aureus OX=1280 GN=rpsH PE=1 SV=1	2	599.838		0.0056057	53.557	1
1679	LELPASNIKK	10	Deamidation (NQ)	_LELPASN(de)IKK_	W8U8T8	30S ribosomal protein S8 OS=Staphylococcus aureus OX=1280 GN=rpsH PE=1 SV=1	2	557.329	0.85232	0.0082917	61.78	1
1680	LENMQFTGSFK	11	Oxidation (M)	_LENM(ox)QFTGSFK_	A0A658B9J9	L-threonine dehydratase catabolic TdcB OS=Staphylococcus aureus OX=1280 GN=DDL17_15820 PE=3 SV=1	2	659.311	-1.1108	0.00095341	83.182	1
1681	LENQDGTVITNDTLK	15	Unmodified	_LENQDGTVITNDTLK_	A0A380EJK6	Thiol peroxidase, Bcp-type OS=Staphylococcus aureus OX=1280 GN=NCTC10702_02956 PE=4 SV=1	2	830.923	0.54678	9.1464e-12	126.77	1
1682	LEQYEVLK	8	Unmodified	_LEQYEVLK_	A0A6B5U8R7	Septation ring formation regulator EzrA OS=Staphylococcus aureus OX=1280 GN=ezrA PE=4 SV=1	2	511.282		0.005576	80.438	1
1684	LETLLGFYK	9	Unmodified	_LETLLGFYK_	A0A2S6DJJ1	MarR family transcriptional regulator (Fragment) OS=Staphylococcus aureus OX=1280 GN=CSC87_14065 PE=4 SV=1	2	542.308	-0.78862	0.005057	83.948	1
1685	LETLLGFYK	9	Unmodified	_LETLLGFYK_	A0A2S6DJJ1	MarR family transcriptional regulator (Fragment) OS=Staphylococcus aureus OX=1280 GN=CSC87_14065 PE=4 SV=1	2	542.308		0.0057223	73.233	1
1686	LEVGEEQASHFGMTK	15	Oxidation (M)	_LEVGEEQASHFGM(ox)TK_	A0A077UVV7	Phnb OS=Staphylococcus aureus OX=1280 GN=ERS140147_01493 PE=4 SV=1	3	560.263	1.9498	0.0038476	57.288	1
1687	LEVGEEQASHFGMTK	15	Unmodified	_LEVGEEQASHFGMTK_	A0A077UVV7	Phnb OS=Staphylococcus aureus OX=1280 GN=ERS140147_01493 PE=4 SV=1	3	554.931	-2.6936	0.00029889	84.759	1
1688	LEYINNNAK	9	Unmodified	_LEYINNNAK_	A0A6B5QME4	PTS glucose transporter subunit IIA (Fragment) OS=Staphylococcus aureus OX=1280 GN=G0Y42_14040 PE=4 SV=1	2	539.78	0.58181	0.001814	96.948	1
1689	LEYQNPGGSVKDR	13	malon(K)	_LEYQNPGGSVK(ma)DR_	W8TRW6	Cysteine synthase OS=Staphylococcus aureus OX=1280 GN=cysK PE=3 SV=1	2	774.868	-1.9046	0.0012669	90.561	1
1690	LFATDWDNVKPDVYILGK	18	Unmodified	_LFATDWDNVKPDVYILGK_	A0A6B5BCA5	Ornithine--oxo-acid transaminase OS=Staphylococcus aureus OX=1280 GN=G0V21_03190 PE=4 SV=1	3	698.702	1.4875	1.6588e-05	89.311	1
1691	LFDEISDLEK	10	Unmodified	_LFDEISDLEK_	A0A033UGY8	Uncharacterized protein OS=Staphylococcus aureus C0673 OX=1413510 GN=V070_02277 PE=4 SV=1	2	604.806		0.013059	50.353	1
1692	LFDQIIK	7	Unmodified	_LFDQIIK_	A0A6B1RQ03	HTH-type transcriptional regulator SarS OS=Staphylococcus aureus OX=1280 GN=sarS PE=4 SV=1	2	438.763	1.6392	0.025402	82.671	1
1693	LFGSVSTKQIAEALK	15	malon(K)	_LFGSVSTK(ma)QIAEALK_	W8TQ45	50S ribosomal protein L9 OS=Staphylococcus aureus OX=1280 GN=rplI PE=3 SV=1	2	839.457	-2.3309	0.0022339	82.877	1
1694	LFNTSPVFSQIPGPNHVESR	20	Unmodified	_LFNTSPVFSQIPGPNHVESR_	A0A380DU87	Opine dehydrogenase OS=Staphylococcus aureus OX=1280 GN=odh PE=4 SV=1	3	742.715	1.6556	1.5988e-08	102.07	1
1695	LFTVTEHYER	10	Unmodified	_LFTVTEHYER_	T1Y9U1	D-alanine aminotransferase OS=Staphylococcus aureus subsp. aureus CN1 OX=1193576 GN=SAKOR_01692 PE=3 SV=1	2	647.825	0.89056	0.0033633	82.417	1
1696	LFTVTEHYER	10	Unmodified	_LFTVTEHYER_	T1Y9U1	D-alanine aminotransferase OS=Staphylococcus aureus subsp. aureus CN1 OX=1193576 GN=SAKOR_01692 PE=3 SV=1	3	432.219	1.1171	0.022302	33.89	1
1697	LFVIGGGDSAVEEGTFLTK	19	Unmodified	_LFVIGGGDSAVEEGTFLTK_	Q9KX07	Thioredoxin reductase (Fragment) OS=Staphylococcus aureus OX=1280 PE=3 SV=1	2	970.504	1.7217	9.1092e-10	108.71	1
1698	LFVIGGGDSAVEEGTFLTK	19	Unmodified	_LFVIGGGDSAVEEGTFLTK_	Q9KX07	Thioredoxin reductase (Fragment) OS=Staphylococcus aureus OX=1280 PE=3 SV=1	3	647.339	2.358	4.7008e-05	77.506	1
1699	LFVYGGAEHPHAAQQPENYELR	22	Unmodified	_LFVYGGAEHPHAAQQPENYELR_	W8TUE6	50S ribosomal protein L13 OS=Staphylococcus aureus OX=1280 GN=rplM PE=1 SV=1	4	632.309	1.1951	0.00011961	61.942	1
1700	LFVYGGAEHPHAAQQPENYELR	22	Unmodified	_LFVYGGAEHPHAAQQPENYELR_	W8TUE6	50S ribosomal protein L13 OS=Staphylococcus aureus OX=1280 GN=rplM PE=1 SV=1	3	842.744	1.5403	2.0224e-51	179.58	1
1701	LGDDQFVSTVAK	12	Unmodified	_LGDDQFVSTVAK_	A0A6B5I2R8	DNA gyrase subunit A OS=Staphylococcus aureus OX=1280 GN=gyrA PE=4 SV=1	2	640.33	2.35	0.0027296	76.073	1
1702	LGEFAPTR	8	Unmodified	_LGEFAPTR_	Q6GEI7	30S ribosomal protein S19 OS=Staphylococcus aureus (strain MRSA252) OX=282458 GN=rpsS PE=3 SV=1	2	445.74	-2.8812	0.028001	66.504	1
1703	LGEFINSLDNVEK	13	Unmodified	_LGEFINSLDNVEK_	A0A1D4ZSF7	Pyruvate formate-lyase activating enzyme OS=Staphylococcus aureus OX=1280 GN=pflA_2 PE=4 SV=1	2	739.38	0.65863	0.0058119	66.989	1
1704	LGGADIAR	8	Unmodified	_LGGADIAR_	T1YAQ4	30S ribosomal protein S3 OS=Staphylococcus aureus subsp. aureus CN1 OX=1193576 GN=rpsC PE=3 SV=1	2	386.719	-0.031558	0.013488	82.452	1
1705	LGGYAVDLLMQGETAK	16	Unmodified	_LGGYAVDLLMQGETAK_	W8TVL7	ATP-dependent 6-phosphofructokinase OS=Staphylococcus aureus OX=1280 GN=pfkA PE=3 SV=1	2	833.429	-0.905	5.1085e-06	106.38	1
1706	LGGYDAVGPVLQGLNSPVNDLSR	23	Unmodified	_LGGYDAVGPVLQGLNSPVNDLSR_	W8USY9	Phosphate acetyltransferase OS=Staphylococcus aureus OX=1280 GN=eutD PE=4 SV=1	3	781.076	1.9084	0.0050297	34.65	1
1707	LGIFTPELEQLHK	13	Unmodified	_LGIFTPELEQLHK_	A0A2S6DT44	Glucokinase OS=Staphylococcus aureus OX=1280 GN=glcK PE=4 SV=1	3	508.952	0.51899	0.027189	26.112	1
1708	LGIQAFEPTLVEGR	14	Unmodified	_LGIQAFEPTLVEGR_	A0A6B5TUA1	DNA-directed RNA polymerase subunit beta OS=Staphylococcus aureus OX=1280 GN=rpoC PE=4 SV=1	2	765.42	-1.262	8.2956e-05	102.52	1
1709	LGISDGDVEETEDAPK	16	Unmodified	_LGISDGDVEETEDAPK_	Q2FZ09	Protein RecA OS=Staphylococcus aureus (strain NCTC 8325) OX=93061 GN=recA PE=3 SV=1	2	837.889	0.5809	3.6313e-25	166.9	1
1710	LGISLSGTGK	10	Unmodified	_LGISLSGTGK_	W8TVK2	30S ribosomal protein S4 OS=Staphylococcus aureus OX=1280 GN=rpsD PE=1 SV=1	2	466.774	0.82119	0.015884	62.466	1
1711	LGQVDELTTANIGK	14	Unmodified	_LGQVDELTTANIGK_	A0A0U1MZZ9	Putative peptidase OS=Staphylococcus aureus OX=1280 GN=pepT_1 PE=3 SV=1	2	729.894	1.9858	0.015452	53.3	1
1712	LGSQATYLPLK	11	Unmodified	_LGSQATYLPLK_	A0A077VL81	Protein translocase subunit SecY OS=Staphylococcus aureus OX=1280 GN=secY_1 PE=3 SV=1	2	595.843	0.039954	0.0064401	68.536	1
1713	LGVDADK	7	Unmodified	_LGVDADK_	T1YA07	Acyl carrier protein OS=Staphylococcus aureus subsp. aureus CN1 OX=1193576 GN=acpP PE=3 SV=1	2	359.193	-0.31686	0.02542	84.097	1
1714	LGVDADKVTEDASFK	15	malon(K)	_LGVDADK(ma)VTEDASFK_	T1YA07	Acyl carrier protein OS=Staphylococcus aureus subsp. aureus CN1 OX=1193576 GN=acpP PE=3 SV=1	2	840.902		3.2022e-26	124.99	1
1715	LGVPGEQELGGR	12	Unmodified	_LGVPGEQELGGR_	A0A380E1N6	Thioredoxin reductase OS=Staphylococcus aureus OX=1280 GN=trxB_4 PE=4 SV=1	2	606.323	-1.8162	0.0096886	63.091	1
1716	LGYDQVLWLDGVEQK	15	Unmodified	_LGYDQVLWLDGVEQK_	A0A6A9H2G2	Branched-chain amino acid aminotransferase OS=Staphylococcus aureus OX=1280 GN=GAY51_12120 PE=4 SV=1	2	881.954	0.88041	0.00060862	90.229	1
1717	LHELKPAEGSR	11	Unmodified	_LHELKPAEGSR_	T1YCD9	50S ribosomal protein L15 OS=Staphylococcus aureus subsp. aureus CN1 OX=1193576 GN=rplO PE=3 SV=1	3	412.895	0.84963	4.6687e-07	110.08	1
1718	LHELKPAEGSR	11	Unmodified	_LHELKPAEGSR_	T1YCD9	50S ribosomal protein L15 OS=Staphylococcus aureus subsp. aureus CN1 OX=1193576 GN=rplO PE=3 SV=1	2	618.838	0.28637	0.0019371	92.866	1
1719	LHELKPAEGSR	11	Unmodified	_LHELKPAEGSR_	T1YCD9	50S ribosomal protein L15 OS=Staphylococcus aureus subsp. aureus CN1 OX=1193576 GN=rplO PE=3 SV=1	3	412.895	2.2488	0.0040522	60.691	1
1720	LHELKPAEGSR	11	Unmodified	_LHELKPAEGSR_	T1YCD9	50S ribosomal protein L15 OS=Staphylococcus aureus subsp. aureus CN1 OX=1193576 GN=rplO PE=3 SV=1	3	412.895	2.0354	0.021997	35.523	1
1721	LHELKPAEGSR	11	malon(K)	_LHELK(ma)PAEGSR_	T1YCD9	50S ribosomal protein L15 OS=Staphylococcus aureus subsp. aureus CN1 OX=1193576 GN=rplO PE=3 SV=1	3	441.561		0.0149	46.73	1
1722	LHLNDLHDSEISLISTSGTFSDR	23	Unmodified	_LHLNDLHDSEISLISTSGTFSDR_	A0A380EDH2	Transcriptional regulator OS=Staphylococcus aureus OX=1280 GN=NCTC10702_00728 PE=4 SV=1	4	640.069	1.5644	9.1803e-19	128.67	1
1723	LHLNDLHDSEISLISTSGTFSDR	23	Unmodified	_LHLNDLHDSEISLISTSGTFSDR_	A0A380EDH2	Transcriptional regulator OS=Staphylococcus aureus OX=1280 GN=NCTC10702_00728 PE=4 SV=1	3	853.089	1.7225	4.7019e-05	65.833	1
1724	LHMEEDAGK	9	Unmodified	_LHMEEDAGK_	A0A2Y9TRY4	Aspartyl/glutamyl-tRNA(Asn/Gln) amidotransferase subunit B OS=Staphylococcus aureus OX=1280 GN=gatB PE=3 SV=1	2	515.237	-0.92653	0.010815	72.243	1
[truncated: 2,042 more rows]

## Sheet: statistics
		Number of modification sites per protein	Number of proteins
		1	191
		2	51
[truncated: 5 more rows]
